# Supplementary material for: OmiXAI: An Ensemble XAI Pipeline for Interpretable Deep Learning in Omics Data
Source: Research Square preprint supplement (doi:10.21203/rs.3.rs-7178493/v1), 2025-08-27
Supplement: Supplementary file 1 [file 1bd121ef84fa8ab0ea565b2d.xlsx]

## Sheet: RRA ranking
feature	full_RRA_rank	full_RRA_score	cnn_RRA_rank	cnn_RRA_score	gnn_RRA_rank	gnn_RRA_score	cnn_IxG_rank	cnn_IxG	cnn_IG_rank	cnn_IG	cnn_GuidedBackprop_rank	cnn_GuidedBackprop	cnn_Deconvolution_rank	cnn_Deconvolution	gnn_IG_rank	gnn_IG	gnn_IxG_rank	gnn_IxG	gnn_Deconvolution_rank	gnn_Deconvolution	gnn_GuidedBackprop_rank	gnn_GuidedBackprop
T	1	1.26639e-25	1	4.44451e-12	1	4.10333e-14	1	4.76724	1	16.4291	1	0.598711	2	61.7296	1	0.321547	1	0.310316	2	0.0590028	2	0.0590028
G	2	5.80792e-19	2	4.44451e-12	3	2.05718e-10	2	1.59675	2	8.00062	2	0.593615	1	71.4414	2	0.316852	2	0.305881	11	0.0373166	11	0.0373166
KLF4	3	1.88751e-12	3	1.82253e-09	48	2.26076e-05	5	0.0150203	3	0.151485	9	0.00626303	7	32.5271	6	0.00162831	15	0.00076866	146	0.0116297	146	0.0116297
CIC	4	9.93346e-12	6	1.1048e-06	16	4.3679e-07	4	0.022583	1938	-0.0243057	8	0.00755651	8	28.5928	3	0.0028433	3	0.00348192	170	0.0108444	170	0.0108444
DDX5	5	2.92757e-11	65	0.00419973	4	7.96771e-10	1942	-0.0245201	1944	-0.0843793	26	-0.00724955	14	11.9035	5	0.00182992	4	0.00314184	20	0.029989	20	0.029989
ZNF417	6	9.19258e-11	42	0.00152323	7	2.11592e-08	90	0.000453775	68	0.00460819	72	-0.0158852	673	-2.98515	63	0.000319946	52	0.00031501	29	0.0267482	29	0.0267482
BMI1	7	1.72715e-10	116	0.0184193	2	2.01849e-10	1817	-0.00106121	55	0.00609271	32	-0.00895535	1616	-4.76049	16	0.00107189	12	0.000905614	8	0.0401653	8	0.0401653
CENPA	8	3.01728e-10	18	0.000136393	19	8.94367e-07	15	0.00427615	11	0.027064	40	-0.0102459	282	-2.10387	1600	-2.91035e-05	14	0.000828894	25	0.0282328	25	0.0282328
SOX17	9	5.10619e-10	54	0.00268543	11	9.14635e-08	1789	-0.000710044	32	0.0117489	109	-0.0191892	95	-1.09135	8	0.00139843	8	0.00108866	21	0.0293867	21	0.0293867
TET2	10	2.25092e-09	35	0.000922352	18	7.53375e-07	1886	-0.00276464	29	0.013073	23	-0.00559496	76	-0.588429	57	0.000372877	1753	-0.000109796	16	0.0315319	16	0.0315319
H3K4me2	11	5.20348e-09	22	0.00023495	35	4.93863e-06	8	0.00966493	5	0.0720295	48	-0.0113881	1453	-4.31355	1761	-0.000101528	1749	-0.000107246	5	0.0459109	5	0.0459109
KAT6B	12	7.86357e-09	41	0.0014736	10	7.64064e-08	1841	-0.00159384	36	0.0101842	89	-0.0177552	75	-0.550214	24	0.000831387	11	0.000912594	12	0.0348405	12	0.0348405
CTCF	13	1.40228e-08	115	0.017768	13	1.85198e-07	1936	-0.0103329	1935	-0.0190684	25	-0.00663904	54	0.304423	131	0.000119636	43	0.000411494	17	0.0309721	17	0.0309721
BrdU	14	1.76241e-08	4	1.7074e-07	82	0.0002561	6	0.0136457	4	0.0735502	28	-0.00829845	23	6.12499	15	0.0011274	69	0.000231184	185	0.0100348	185	0.0100348
ATRX	15	1.97672e-08	52	0.00208114	23	1.81168e-06	20	0.0031292	51	0.00664346	100	-0.0184272	678	-2.99071	9	0.00136939	7	0.00111378	51	0.0188917	51	0.0188917
SETDB1	16	2.17055e-08	37	0.00108509	51	3.80271e-05	216	0.000111739	15	0.0249153	86	-0.0175633	250	-1.98738	265	2.00419e-05	78	0.000180162	139	0.012138	139	0.012138
NKRF	17	3.16181e-08	99	0.0104606	15	3.62057e-07	75	0.000636863	60	0.00542299	173	-0.0222936	987	-3.48221	38	0.000589226	27	0.000509105	44	0.0218175	44	0.0218175
RNA polymerase III	18	4.5024e-08	101	0.0117484	30	3.6119e-06	1792	-0.000753824	14	0.0260227	180	-0.0224972	89	-0.997224	54	0.000403583	94	0.00013452	166	0.0109266	166	0.0109266
SLC30A9	19	6.606e-08	218	0.0811127	5	9.68319e-10	96	0.000420479	118	0.0025126	357	-0.0262021	1007	-3.51649	11	0.00129554	13	0.000892597	6	0.0447029	6	0.0447029
RNA polymerase II	20	9.23413e-08	88	0.00844067	32	4.31593e-06	1925	-0.00632553	188	0.000860753	33	-0.00896539	37	3.0128	1806	-0.00015239	1796	-0.000161027	14	0.033355	14	0.033355
H3K4me3	21	1.22987e-07	47	0.00180661	44	2.06201e-05	1938	-0.0112819	129	0.00227144	17	-0.00167717	15	10.1333	1928	-0.00115537	1946	-0.00322993	10	0.0373876	10	0.0373876
H2AK5ac	22	1.48773e-07	94	0.00932136	17	5.30002e-07	44	0.00122076	76	0.00438194	292	-0.0250545	428	-2.50399	51	0.000421069	55	0.000304015	23	0.0287912	23	0.0287912
macroH2A1.2	23	1.95793e-07	341	0.217198	12	1.64714e-07	1895	-0.00327108	326	0.000268643	27	-0.00778539	1169	-3.79642	41	0.000562389	252	1.12724e-05	38	0.0235553	38	0.0235553
ZNF770	24	2.96439e-07	295	0.158643	6	1.66171e-08	1767	-0.000527418	168	0.00116326	84	-0.0175244	470	-2.60401	45	0.000534717	44	0.0004027	4	0.0470298	4	0.0470298
ZNF384	25	3.69839e-07	71	0.00462052	58	7.71591e-05	29	0.00228804	107	0.00266669	131	-0.0206782	1585	-4.67793	46	0.000473106	60	0.000275679	145	0.011632	145	0.011632
MYCN	26	6.24413e-07	282	0.136309	21	1.10795e-06	1887	-0.0027864	1846	-0.0022671	135	-0.0208765	155	-1.56071	32	0.000704041	49	0.000331986	59	0.0180277	59	0.0180277
KLF11	26	6.24413e-07	278	0.133534	20	9.00218e-07	419	2.49377e-05	110	0.00262583	155	-0.0216379	1811	-5.799	17	0.00103613	10	0.00100643	43	0.0220121	43	0.0220121
ERBB2	28	7.97008e-07	129	0.0232924	38	1.05636e-05	31	0.00211315	62	0.00537026	1767	-0.0336055	688	-3.00029	81	0.000227763	97	0.000131405	39	0.0235447	39	0.0235447
NELFA	29	8.01023e-07	21	0.000182047	62	0.000105695	134	0.000295203	44	0.0086558	35	-0.00911211	160	-1.57277	1923	-0.00105468	1912	-0.000956065	47	0.0202591	47	0.0202591
ESR1	30	8.5513e-07	163	0.0430802	37	9.15156e-06	22	0.00279075	1697	-0.000398903	620	-0.0287536	85	-0.790579	22	0.000867998	16	0.000749598	62	0.0178312	62	0.0178312
EZH2	31	9.26625e-07	10	1.02821e-05	151	0.00191065	3	0.0414287	16	0.0248502	78	-0.0167131	24	5.68577	62	0.000324855	1873	-0.000429683	141	0.0120578	141	0.0120578
RAD21	32	1.19082e-06	25	0.000371921	140	0.00154255	1920	-0.00597566	28	0.0141809	37	-0.00942786	56	0.265657	10	0.00133718	5	0.00148764	267	0.00741096	267	0.00741096
DNMT3B	33	1.21637e-06	64	0.00411973	25	3.24832e-06	1931	-0.00864259	79	0.00408993	13	-0.000515128	126	-1.37466	1940	-0.00179918	1929	-0.00139552	27	0.0273236	27	0.0273236
KDM3A	34	1.4228e-06	30	0.00062814	94	0.000377403	1945	-0.0489724	1946	-0.190523	10	0.00325816	9	25.4743	4	0.00226862	1925	-0.00125109	669	0.000828253	669	0.000828253
H3	35	1.776e-06	8	3.84613e-06	351	0.0688572	61	0.000811006	8	0.0358128	19	-0.00269926	26	5.13871	56	0.000395414	1937	-0.00180946	1490	-0.00489515	1490	-0.00489515
CDC5L	36	2.49641e-06	195	0.0627446	33	4.40198e-06	104	0.000388447	131	0.00207712	321	-0.0255527	1146	-3.74006	34	0.000668498	39	0.000436734	42	0.0222364	42	0.0222364
ELL2	37	3.2065e-06	111	0.0152931	54	6.26337e-05	33	0.00200677	93	0.00318147	197	-0.0231129	1463	-4.33546	80	0.000228786	67	0.000233244	96	0.0147568	96	0.0147568
GPN1	38	4.04965e-06	230	0.0878201	46	2.25025e-05	60	0.000886349	123	0.00235979	603	-0.0286275	1045	-3.57609	99	0.000177213	80	0.000178946	36	0.0239257	36	0.0239257
KLF8	39	4.37589e-06	977	1	9	6.63967e-08	797	9.83918e-07	174	0.00110246	1296	-0.0316441	1506	-4.45451	33	0.000674955	35	0.000457456	1	0.0680145	1	0.0680145
ZNF300	40	5.00029e-06	53	0.00243551	106	0.000612615	68	0.000731522	124	0.00235972	306	-0.0252779	244	-1.97213	47	0.000470587	1764	-0.000121778	106	0.0140108	106	0.0140108
DMAP1	41	5.75243e-06	588	0.497661	8	5.83543e-08	1759	-0.000490832	169	0.00114567	314	-0.0254117	1563	-4.61202	21	0.000870094	17	0.000627477	13	0.0338967	13	0.0338967
ZNF768	42	7.11439e-06	977	1	14	2.8842e-07	1827	-0.00123883	1856	-0.00252913	425	-0.0270246	592	-2.83183	7	0.00145974	6	0.00124986	15	0.0330655	15	0.0330655
SIX2	43	7.45213e-06	5	2.25003e-07	706	0.685614	7	0.0111767	7	0.0562463	20	-0.00451916	30	4.02367	1932	-0.00138309	1935	-0.00163801	1398	-0.00346123	1398	-0.00346123
KMT2A	44	9.52775e-06	19	0.000146823	218	0.00788858	1933	-0.00917264	22	0.0199557	41	-0.0104631	25	5.30355	1880	-0.000360067	34	0.000458794	247	0.00793868	247	0.00793868
H3K27ac	45	1.00881e-05	686	0.632166	24	2.39158e-06	1913	-0.00474018	1887	-0.00422529	82	-0.0172836	914	-3.38824	1522	-1.63458e-05	74	0.000200124	9	0.0394269	9	0.0394269
GTF3C2	46	1.07722e-05	209	0.0733851	56	6.95957e-05	112	0.000357759	1796	-0.00114992	70	-0.0153325	1896	-7.19876	108	0.000159018	142	5.7445e-05	18	0.0307846	18	0.0307846
USF3	47	1.14532e-05	23	0.000272645	142	0.00163496	47	0.00116437	74	0.00445101	149	-0.0213953	177	-1.68945	232	2.80556e-05	139	5.98429e-05	496	0.00286329	496	0.00286329
ZNF354C	48	1.66306e-05	135	0.0255488	107	0.000637988	1798	-0.000789003	111	0.00261999	235	-0.024003	74	-0.457252	68	0.000275043	87	0.000153298	236	0.00821307	236	0.00821307
TRPS1	49	1.83428e-05	417	0.304888	29	3.49251e-06	1884	-0.00268586	1930	-0.0137532	239	-0.0240492	201	-1.81136	29	0.000750949	45	0.00035134	37	0.0235793	37	0.0235793
5-mC	50	2.23962e-05	80	0.00673291	103	0.000451058	1935	-0.0101737	1760	-0.000714178	24	-0.00583172	33	3.28312	1942	-0.00217385	1944	-0.00298917	82	0.015846	82	0.015846
ADNP	51	2.38207e-05	46	0.00178789	131	0.00109759	1924	-0.00613012	40	0.00943794	95	-0.0180324	55	0.274853	19	0.000976836	9	0.00102169	249	0.00778696	249	0.00778696
SMARCA2	52	2.60473e-05	238	0.0933007	78	0.000216091	1836	-0.00146807	82	0.00376131	369	-0.0264674	364	-2.35421	26	0.000817311	40	0.000426686	183	0.010042	183	0.010042
KMT2B	53	2.77631e-05	7	1.87925e-06	405	0.146232	9	0.00889909	21	0.0204911	51	-0.0119396	32	3.38857	110	0.000152907	1903	-0.000754113	695	0.000604687	695	0.000604687
NR2E3	54	3.78254e-05	76	0.00610305	123	0.000935811	62	0.000810424	173	0.00111695	346	-0.0260234	385	-2.40728	105	0.000167453	1786	-0.000141837	241	0.00810433	241	0.00810433
NR3C2	55	3.95866e-05	249	0.0998903	93	0.000368878	378	3.09005e-05	137	0.00192554	251	-0.0242536	1101	-3.6635	50	0.000429078	30	0.000484458	379	0.00467899	379	0.00467899
MSX2	56	4.14197e-05	79	0.00636067	216	0.00739396	389	2.90392e-05	152	0.00150198	248	-0.0242249	264	-2.02391	225	2.9853e-05	1857	-0.000320047	369	0.00498858	369	0.00498858
NR4A1	57	4.26603e-05	172	0.0481282	75	0.000189457	1890	-0.00304242	1901	-0.00573932	63	-0.0144333	90	-0.998003	28	0.000784785	18	0.000627225	174	0.0104816	174	0.0104816
GTF2I	58	4.50481e-05	825	0.802116	26	3.35942e-06	1865	-0.00210605	1759	-0.000713709	106	-0.0189803	1219	-3.88702	44	0.000547901	19	0.000622097	71	0.0172171	71	0.0172171
ZNF641	59	4.63342e-05	266	0.112304	57	7.0909e-05	377	3.09927e-05	181	0.000924517	394	-0.0267102	1262	-3.97183	145	9.87551e-05	101	0.00012225	104	0.0141977	104	0.0141977
CTR9	60	4.93434e-05	112	0.0154971	181	0.00392725	41	0.00132166	101	0.00277492	486	-0.0277627	309	-2.19431	173	6.53136e-05	176	3.43136e-05	229	0.00837278	229	0.00837278
JUN	61	5.58468e-05	12	4.06701e-05	411	0.149018	19	0.00339291	86	0.00359434	44	-0.0108177	110	-1.28782	1919	-0.000924939	1918	-0.00101441	1932	-0.0340138	1932	-0.0340138
RUNX1	62	6.52694e-05	512	0.417873	46	2.25025e-05	1891	-0.00307279	1844	-0.00219036	53	-0.0128903	1866	-6.49497	23	0.000851589	23	0.000554426	113	0.0135653	113	0.0135653
CHD7	63	9.18465e-05	915	0.918546	36	6.03706e-06	1872	-0.00234006	1870	-0.00310212	123	-0.0200555	829	-3.25761	40	0.000572546	57	0.00029585	66	0.0174866	66	0.0174866
ZSCAN23	64	9.50547e-05	131	0.024033	90	0.0003401	63	0.000802275	56	0.00600831	519	-0.0280627	1923	-8.29349	55	0.000399333	70	0.000226966	178	0.0103103	178	0.0103103
ASCL1	65	0.000104904	977	1	22	1.68307e-06	1894	-0.00320547	1899	-0.00565746	293	-0.025062	902	-3.36592	52	0.000412574	42	0.000417884	22	0.029019	22	0.029019
HIF1A	66	0.000105253	283	0.139649	92	0.000366423	1921	-0.00597738	1909	-0.00679888	157	-0.0217864	63	-0.0420249	25	0.000821452	50	0.000331424	199	0.00938336	199	0.00938336
POU6F1	67	0.000111662	114	0.0171279	171	0.00280747	53	0.000972084	31	0.0124816	271	-0.0246774	578	-2.80713	72	0.000267839	59	0.000281036	302	0.00654465	302	0.00654465
H4	68	0.000117158	290	0.151205	97	0.000404551	1831	-0.00136363	189	0.000838279	329	-0.0256936	438	-2.53792	30	0.000720525	28	0.000502647	134	0.0123224	134	0.0123224
ZNF574	69	0.000128176	932	0.945473	31	3.8156e-06	1685	-0.000248398	127	0.00232692	802	-0.029795	1277	-3.99554	71	0.000273832	79	0.000179512	7	0.0410071	7	0.0410071
FOXK2	70	0.000135471	168	0.0451647	26	3.35942e-06	246	8.81334e-05	209	0.000671682	456	-0.0274117	635	-2.91848	77	0.000243688	71	0.00022008	24	0.0283269	24	0.0283269
HOXC11	71	0.00013996	136	0.0268302	118	0.000875916	116	0.000350684	161	0.00131308	718	-0.0293355	239	-1.95088	122	0.000136243	137	6.15321e-05	153	0.0114135	153	0.0114135
CHD6	72	0.000155787	117	0.0186812	190	0.00451776	1765	-0.000520929	49	0.00830901	211	-0.0233245	106	-1.27321	48	0.000457352	144	5.64299e-05	1786	-0.0137171	1786	-0.0137171
WAS	73	0.000158967	147	0.0320434	145	0.00169759	1892	-0.00307286	1922	-0.0102928	59	-0.0141465	73	-0.440321	1881	-0.000369869	1852	-0.000302502	54	0.0185732	54	0.0185732
S100A10	74	0.000169803	93	0.00894455	265	0.0205809	74	0.000660079	52	0.00663897	164	-0.0220048	446	-2.55498	183	5.44288e-05	199	2.48725e-05	457	0.00343241	457	0.00343241
H3.Y	75	0.000187889	901	0.89694	39	1.1465e-05	1732	-0.000374563	1842	-0.00217279	443	-0.0271919	185	-1.71762	67	0.000288087	82	0.000170672	85	0.0157345	85	0.0157345
FOXP1	76	0.000190084	539	0.440502	53	5.62368e-05	1888	-0.00282145	1916	-0.00877916	56	-0.0134015	1416	-4.24136	49	0.000448575	73	0.000205343	136	0.0122758	136	0.0122758
JARID2	77	0.0001939	308	0.177598	60	8.49715e-05	1821	-0.00112492	357	0.000224497	464	-0.0275404	237	-1.94952	114	0.000151271	133	6.55747e-05	78	0.0163342	78	0.0163342
BAHCC1	78	0.000205742	977	1	26	3.35942e-06	1620	-0.000128848	1753	-0.000665192	577	-0.0284238	1398	-4.21242	75	0.000258439	65	0.000241229	26	0.0278853	26	0.0278853
FOXA1	79	0.000224038	15	9.95862e-05	607	0.51638	1934	-0.00951329	9	0.032088	21	-0.00457075	36	3.11206	1857	-0.000259707	1877	-0.000449309	1351	-0.00287295	1351	-0.00287295
KDM2B	80	0.000232215	757	0.718159	41	1.38709e-05	1796	-0.00077984	1798	-0.00115255	388	-0.0266879	172	-1.65916	138	0.000108251	109	9.93308e-05	49	0.0193523	49	0.0193523
PPARGC1A	81	0.000260604	72	0.00471773	280	0.0259864	99	0.000400598	37	0.0100273	274	-0.0247338	361	-2.34685	166	7.07318e-05	1644	-4.84612e-05	404	0.00421614	404	0.00421614
MAX	82	0.000271577	34	0.00090328	332	0.0552285	1941	-0.0211969	133	0.00203168	7	0.0121141	12	14.3851	1939	-0.00178309	1943	-0.00285231	434	0.00381039	434	0.00381039
TRIB3	83	0.000272635	124	0.0214263	208	0.00692573	199	0.00013543	318	0.000283364	527	-0.0281268	215	-1.86059	184	5.41973e-05	190	2.78286e-05	179	0.0102898	179	0.0102898
RYBP	84	0.000278708	977	1	34	4.59112e-06	1383	-1.96235e-05	241	0.000516048	908	-0.0302159	528	-2.70859	82	0.000227208	72	0.000212794	19	0.0303875	19	0.0303875
ZBTB14	85	0.000283019	58	0.00329428	346	0.0625661	21	0.00294949	50	0.00725139	177	-0.0224381	330	-2.24202	1898	-0.00058601	1896	-0.000668426	341	0.00564717	341	0.00564717
H2A.Zac	86	0.000285032	977	1	43	1.66836e-05	1799	-0.000805147	1819	-0.00148065	176	-0.0224336	1686	-4.97835	78	0.000243077	105	0.000108108	97	0.0147438	97	0.0147438
NCOR1	87	0.000295935	212	0.0758099	80	0.000223831	167	0.000209578	239	0.000518252	769	-0.0295955	343	-2.2785	180	5.75749e-05	174	3.46598e-05	34	0.0241575	34	0.0241575
E2F4	88	0.000353901	62	0.00388556	243	0.012808	10	0.00673476	25	0.016387	431	-0.0270898	512	-2.67981	69	0.000274814	66	0.000239457	554	0.00210179	554	0.00210179
HDAC3	89	0.00036842	606	0.520191	77	0.000212454	1763	-0.000515419	1799	-0.00116708	273	-0.0247039	322	-2.22013	79	0.000235056	56	0.000302095	270	0.00733665	270	0.00733665
H2A.Z	90	0.00037329	276	0.133005	110	0.000748907	1922	-0.00600155	1826	-0.0016641	153	-0.0215682	53	0.327786	1913	-0.000803496	1913	-0.000961204	107	0.014	107	0.014
ZNF692	91	0.000392944	222	0.0842717	52	4.38288e-05	330	4.54932e-05	356	0.000224738	1644	-0.0328706	252	-1.99703	195	4.60826e-05	159	4.51862e-05	3	0.047797	3	0.047797
ZBTB17	92	0.000421345	379	0.259782	128	0.00101415	1719	-0.000346915	219	0.000606055	42	-0.0105486	1330	-4.08796	20	0.000955844	20	0.00059478	245	0.0080285	245	0.0080285
KANSL1	93	0.00042782	226	0.0869889	108	0.000654411	178	0.000186163	335	0.000258049	360	-0.0262413	802	-3.19473	224	3.09259e-05	205	2.23574e-05	57	0.0181439	57	0.0181439
PDHA1	94	0.000431525	207	0.0717897	127	0.00101347	142	0.000268634	329	0.000266352	713	-0.0292882	546	-2.73658	124	0.000130841	145	5.62972e-05	370	0.00498813	370	0.00498813
ZNF610	95	0.000444677	142	0.0295152	241	0.0123309	117	0.000350028	141	0.00181754	247	-0.0242204	1632	-4.80493	119	0.000139869	1553	-2.48368e-05	221	0.00859435	221	0.00859435
ZNF217	96	0.000456743	95	0.00936486	87	0.000325426	28	0.00228886	39	0.00997424	949	-0.0303753	1878	-6.7371	159	7.59669e-05	111	9.81697e-05	116	0.0135232	116	0.0135232
SUZ12	97	0.000459881	123	0.0204408	188	0.00441627	1911	-0.00460882	1836	-0.00197856	39	-0.00988031	58	0.125109	1885	-0.000407516	1884	-0.000502202	91	0.0152632	91	0.0152632
ZNF227	98	0.000475135	167	0.045068	83	0.000259642	72	0.000676089	87	0.00348615	1266	-0.0315694	1892	-7.05594	259	2.13732e-05	168	4.02664e-05	76	0.0165347	76	0.0165347
ZBTB46	99	0.000497254	299	0.164005	104	0.000544901	97	0.000406177	171	0.00113505	517	-0.0280426	1083	-3.63933	128	0.00012309	88	0.000153141	151	0.0114198	151	0.0114198
ETS1	100	0.000554586	977	1	71	0.000141575	1714	-0.000331371	164	0.00122782	544	-0.02822	1084	-3.64077	96	0.000187705	76	0.000184356	70	0.0173196	70	0.0173196
ZNF207	101	0.000563553	454	0.345441	132	0.00111927	1851	-0.00179562	1889	-0.00439485	256	-0.0243906	256	-2.00624	61	0.000330141	51	0.000322771	250	0.00777172	250	0.00777172
CDKN1B	102	0.000578267	589	0.500448	49	2.56179e-05	1737	-0.000380401	461	0.000101526	201	-0.023184	679	-2.991	76	0.000247337	62	0.000257643	86	0.0155219	86	0.0155219
BAP1	103	0.00061976	74	0.00567115	316	0.0441445	159	0.000224936	162	0.00129583	378	-0.0265667	43	2.06179	347	7.2329e-06	278	7.67779e-06	172	0.010512	172	0.010512
MYOCD	104	0.000624482	773	0.739157	86	0.0003234	1899	-0.00370868	1927	-0.0113271	97	-0.0181448	737	-3.08273	1799	-0.000145278	37	0.000444014	67	0.0174466	67	0.0174466
ING2	105	0.000636814	44	0.00160142	235	0.0109096	1943	-0.0277755	1943	-0.0755944	16	-0.00153477	16	8.5929	1946	-0.00331067	1939	-0.00199863	214	0.00877936	214	0.00877936
EEA1	106	0.000651626	223	0.0846563	202	0.00654482	170	0.000208099	282	0.000365022	688	-0.0291933	743	-3.09554	238	2.65328e-05	213	1.99129e-05	149	0.0114775	149	0.0114775
LMNA	107	0.000673489	977	1	45	2.20551e-05	1700	-0.000285009	1827	-0.00166424	263	-0.0245213	1212	-3.86848	18	0.00102932	24	0.000538503	155	0.0113806	155	0.0113806
DACH1	108	0.000703295	275	0.129736	116	0.00081875	121	0.000332455	1438	-3.27467e-05	151	-0.0214889	736	-3.08191	171	6.70984e-05	143	5.71879e-05	152	0.0114173	152	0.0114173
SREBF2	109	0.000708011	470	0.367695	88	0.000331667	1785	-0.000679217	216	0.000635174	265	-0.0245278	1512	-4.47278	101	0.000173767	162	4.4162e-05	160	0.0112371	160	0.0112371
H3K27me3	110	0.000722382	530	0.432971	105	0.000574772	1912	-0.00464641	1890	-0.00448575	55	-0.0132627	510	-2.67694	1570	-2.30349e-05	1822	-0.000203713	35	0.0241539	35	0.0241539
CC2D1A	111	0.000775048	133	0.0252347	264	0.0204997	95	0.000423233	108	0.00264072	693	-0.0292064	234	-1.92629	359	5.25073e-06	347	2.33208e-06	271	0.00731511	271	0.00731511
ZFP36	112	0.00079403	977	1	40	1.35513e-05	1710	-0.000317352	1802	-0.00118143	283	-0.0248522	588	-2.82397	65	0.000312899	48	0.000335537	30	0.0264689	30	0.0264689
SOX2	112	0.00079403	154	0.0382952	138	0.00148298	1900	-0.00374441	1921	-0.00988658	76	-0.0163519	80	-0.711158	102	0.00017322	31	0.000470597	353	0.00533361	353	0.00533361
ZFP82	114	0.000816334	319	0.190026	96	0.000398413	132	0.0002974	185	0.000905657	1936	-0.0414169	1305	-4.02651	144	0.000100595	208	2.15231e-05	128	0.0125797	128	0.0125797
macroH2A1	115	0.00090182	50	0.00202401	390	0.128207	1946	-0.0526321	1945	-0.183481	18	-0.00228382	6	32.8579	1947	-0.00344315	1947	-0.00356518	1453	-0.00413814	1453	-0.00413814
NR5A2	116	0.000937038	61	0.00365587	312	0.0413352	1743	-0.000400851	12	0.0269149	52	-0.012278	121	-1.34232	43	0.000555827	1897	-0.000670868	969	-8.62049e-05	969	-8.62049e-05
CHD4	117	0.000970536	360	0.234136	149	0.00187756	1839	-0.00152332	89	0.00340156	207	-0.0232926	1699	-5.061	35	0.000648288	26	0.000511297	278	0.00706685	278	0.00706685
MED31	118	0.00103254	252	0.101771	72	0.000147044	250	8.15542e-05	554	5.5451e-05	694	-0.0292102	778	-3.1547	127	0.000124701	114	9.27069e-05	285	0.00684287	285	0.00684287
INO80	119	0.00103271	178	0.0521867	200	0.00599721	70	0.000696552	142	0.00181336	301	-0.0251666	1399	-4.21416	1815	-0.000161048	1891	-0.000570876	114	0.0135479	114	0.0135479
KDM5B	120	0.00104268	9	8.7892e-06	913	1	66	0.000738488	48	0.00831336	75	-0.0161582	44	1.82732	1482	-1.1133e-05	1777	-0.000131603	1638	-0.00808355	1638	-0.00808355
TFAP2A	120	0.00104268	204	0.0684303	228	0.0101623	1845	-0.00166304	1931	-0.0161631	94	-0.0180225	108	-1.28269	14	0.0011416	21	0.000568072	1444	-0.00409513	1444	-0.00409513
C	122	0.00105855	132	0.0245838	332	0.0552285	1948	-2.44784	1948	-5.8075	1947	-0.387175	3	58.8958	1943	-0.00283239	1945	-0.00302875	1947	-0.363393	1947	-0.363393
RUVBL2	123	0.00106421	797	0.775457	70	0.000139249	1722	-0.000350676	1784	-0.000938743	406	-0.0267965	280	-2.09982	89	0.000200935	102	0.000112408	102	0.0143384	102	0.0143384
TRIM22	124	0.00123902	13	6.37123e-05	354	0.0725196	25	0.00259666	13	0.0266996	430	-0.0270897	31	3.96485	132	0.000117376	129	6.77415e-05	1383	-0.00331905	1383	-0.00331905
UBTF	125	0.00127644	838	0.829803	85	0.00029195	1871	-0.0022943	1868	-0.00300045	110	-0.0192733	956	-3.44449	92	0.000193899	46	0.000350789	190	0.00993915	190	0.00993915
PAXIP1	126	0.00133597	26	0.000392049	442	0.193168	1927	-0.00696513	20	0.0205641	43	-0.0107773	57	0.173048	1936	-0.00145854	1821	-0.000200825	466	0.00332566	466	0.00332566
MKL2	127	0.00152067	977	1	90	0.0003401	177	0.0001945	1812	-0.00135903	1026	-0.0307013	1148	-3.74309	125	0.000130669	100	0.000124355	50	0.0191919	50	0.0191919
SMARCB1	128	0.00160629	431	0.318975	191	0.00463158	1753	-0.000440484	592	4.36509e-05	91	-0.0178224	245	-1.97937	206	3.72729e-05	169	3.95847e-05	177	0.0103456	177	0.0103456
ZNF750	129	0.00178789	977	1	50	3.15647e-05	1581	-9.38056e-05	1628	-0.000207199	715	-0.0292947	375	-2.38466	121	0.000136492	116	9.22936e-05	31	0.0257344	31	0.0257344
SMAD1	130	0.00181989	87	0.0083994	416	0.152518	300	5.86416e-05	417	0.000136608	143	-0.0211476	133	-1.41864	436	1.07149e-06	377	1.21935e-06	283	0.00685742	283	0.00685742
KCMF1	130	0.00181989	194	0.062601	256	0.016449	296	6.15501e-05	157	0.00139292	387	-0.0266528	689	-3.00212	205	3.84544e-05	283	7.27463e-06	366	0.00509989	366	0.00509989
ZNF557	132	0.00185145	720	0.674502	111	0.000764727	1464	-3.47961e-05	179	0.000989378	374	-0.0265058	1135	-3.72785	87	0.000206631	98	0.000127996	251	0.00774704	251	0.00774704
FBXO44	133	0.00185631	274	0.128683	288	0.0283553	612	7.91076e-06	229	0.000548737	825	-0.0298796	666	-2.96826	256	2.1674e-05	248	1.23369e-05	513	0.00261839	513	0.00261839
ZBTB11	134	0.00187671	17	0.000100917	295	0.0324159	1944	-0.0434243	1942	-0.0726799	4	0.0652719	4	43.4464	149	8.84511e-05	148	5.31467e-05	521	0.00251776	521	0.00251776
ZIC5	135	0.00206613	269	0.118579	224	0.00961074	73	0.00067286	144	0.0018112	1496	-0.0322651	1430	-4.27538	1663	-4.34694e-05	207	2.16623e-05	60	0.0179039	60	0.0179039
DDIT3	136	0.00226191	159	0.039997	272	0.0232792	328	4.58649e-05	453	0.000110931	616	-0.0287242	78	-0.649679	277	1.76504e-05	264	9.65028e-06	164	0.0110003	164	0.0110003
H3K56ac	137	0.00234773	29	0.000606466	698	0.674706	1850	-0.00174076	6	0.0583141	66	-0.0148929	38	2.79944	193	4.86857e-05	1895	-0.00065834	1443	-0.0040873	1443	-0.0040873
ZFX	138	0.00237077	977	1	81	0.0002464	1766	-0.000525035	1882	-0.00382496	356	-0.026185	1776	-5.4546	12	0.00124722	25	0.000536704	1696	-0.00962274	1696	-0.00962274
ATF1	139	0.00252732	501	0.399558	163	0.00248936	1547	-7.22765e-05	392	0.000166466	624	-0.0287701	534	-2.71892	214	3.46167e-05	226	1.67823e-05	119	0.0132981	119	0.0132981
ZBTB21	140	0.00258865	305	0.170238	157	0.00230581	362	3.50846e-05	457	0.000107595	383	-0.02661	1882	-6.85244	290	1.51531e-05	274	8.43097e-06	45	0.0212171	45	0.0212171
YBX1	141	0.00263975	90	0.00862837	329	0.0518169	1859	-0.00199853	66	0.00473474	111	-0.0195211	162	-1.58814	1678	-4.98439e-05	1702	-7.4826e-05	258	0.00758997	258	0.00758997
DNase-seq DNase-Seq	142	0.00275973	16	0.000100744	804	0.830651	23	0.00275381	26	0.0158576	81	-0.0172361	138	-1.45116	1874	-0.000330403	1911	-0.000949531	1774	-0.0131132	1774	-0.0131132
KDM1A	143	0.00285852	56	0.00306602	331	0.054219	84	0.000522459	114	0.00253142	1887	-0.0357908	17	8.54387	328	8.78281e-06	276	7.9731e-06	216	0.00868924	216	0.00868924
PTF1A	144	0.00289239	45	0.00167867	314	0.0429966	38	0.00153366	43	0.00869693	93	-0.0179333	715	-3.05338	134	0.000115404	1846	-0.000290002	425	0.00390759	425	0.00390759
SS18L1	145	0.00292435	20	0.000157575	913	1	1869	-0.00215474	1841	-0.00215038	3	0.136396	5	36.5336	1484	-1.13528e-05	1591	-3.20551e-05	1478	-0.00457654	1478	-0.00457654
JDP2	146	0.00293664	130	0.0239718	373	0.0965092	180	0.000179667	338	0.000253396	480	-0.0277093	542	-2.72758	298	1.25442e-05	326	3.29357e-06	635	0.00126574	635	0.00126574
EGR1	147	0.00297825	140	0.0287082	241	0.0123309	1903	-0.003902	1910	-0.00708035	64	-0.014447	69	-0.378756	1879	-0.000357591	1904	-0.000758797	169	0.0108896	169	0.0108896
ZNF680	148	0.00299518	55	0.00290981	531	0.358367	51	0.00103859	63	0.00522946	112	-0.0195477	520	-2.69678	1912	-0.000803437	1926	-0.00125557	1896	-0.0234398	1896	-0.0234398
POLR2A	149	0.00304283	654	0.583877	84	0.000269995	1834	-0.0014048	1879	-0.00363661	262	-0.0245195	344	-2.28021	64	0.00031742	89	0.000151328	187	0.00994488	187	0.00994488
TBX18	150	0.00305411	413	0.298162	73	0.000173919	222	0.000104575	1603	-0.000158693	529	-0.0281399	560	-2.7711	169	6.77601e-05	171	3.73992e-05	52	0.0186741	52	0.0186741
ZNF507	151	0.00309215	624	0.548832	173	0.00285286	1879	-0.00252047	1881	-0.003817	129	-0.0205226	332	-2.24517	36	0.000635843	22	0.000565253	303	0.00653119	303	0.00653119
NFATC3	152	0.00320922	127	0.0225628	304	0.0355014	37	0.00155566	61	0.00540406	683	-0.0291714	695	-3.00679	74	0.000264032	135	6.3516e-05	516	0.0025925	516	0.0025925
H2A.Z.2	153	0.00340286	100	0.0108187	379	0.104484	125	0.000312858	175	0.00108548	587	-0.0284644	117	-1.33339	377	3.5251e-06	328	3.24639e-06	484	0.00310251	484	0.00310251
BHLHE40	154	0.0034063	11	3.64116e-05	558	0.411326	26	0.00247855	46	0.00846738	107	-0.0190891	66	-0.334964	304	1.1749e-05	292	5.98837e-06	1000	-0.000207147	1000	-0.000207147
MYC	155	0.00345712	977	1	42	1.50236e-05	1816	-0.00105485	1804	-0.00119992	1881	-0.0355526	573	-2.79668	42	0.000558628	41	0.000421048	75	0.016591	75	0.016591
ANAPC1	156	0.0034722	206	0.0696541	152	0.00202487	79	0.000571839	109	0.00262719	874	-0.0300874	1166	-3.78473	142	0.000102386	134	6.48446e-05	261	0.00755499	261	0.00755499
HDAC1	157	0.00360719	640	0.572115	126	0.000994101	1328	-1.34262e-05	340	0.000249932	1076	-0.0308912	191	-1.77188	244	2.48774e-05	201	2.33356e-05	63	0.0176637	63	0.0176637
TET1	158	0.00367259	977	1	55	6.721e-05	1740	-0.000392878	1705	-0.000418878	511	-0.0280036	1340	-4.10228	126	0.000126581	141	5.84784e-05	33	0.0250747	33	0.0250747
MAML1	159	0.00389026	63	0.0038899	410	0.148076	168	0.000209151	198	0.000775079	344	-0.025957	329	-2.23967	178	5.90036e-05	126	7.28154e-05	1196	-0.00142264	1196	-0.00142264
H3K122sc	160	0.00397135	977	1	130	0.00109579	418	2.49648e-05	1572	-0.000118463	484	-0.0277483	1290	-4.01259	255	2.18428e-05	204	2.23677e-05	158	0.0113371	158	0.0113371
MBD4	161	0.00409211	977	1	114	0.00081027	550	1.16443e-05	1653	-0.000259645	1014	-0.0306377	175	-1.67391	143	0.000101372	128	7.06347e-05	72	0.0170025	72	0.0170025
ZSCAN29	162	0.00419153	24	0.000304782	480	0.276022	17	0.00425184	34	0.0115615	182	-0.0225161	166	-1.62799	1844	-0.000223282	1798	-0.000163123	348	0.00545276	348	0.00545276
TAF7	163	0.00423046	977	1	65	0.000121549	1721	-0.000349605	1743	-0.000618175	569	-0.0283813	938	-3.41796	73	0.000265984	77	0.000180432	48	0.0202277	48	0.0202277
ZSCAN5C	163	0.00423046	658	0.595923	146	0.00169772	1916	-0.00552749	1932	-0.0169515	77	-0.0164547	439	-2.53818	13	0.00114657	32	0.000466343	548	0.00220381	548	0.00220381
TP53BP1	163	0.00423046	36	0.000958861	422	0.164415	1940	-0.0163087	77	0.00424157	22	-0.00511275	42	2.37114	1789	-0.000135081	1830	-0.000212863	1180	-0.00127224	1180	-0.00127224
SP110	166	0.00428976	551	0.454855	117	0.000844691	119	0.000341742	509	7.70558e-05	1284	-0.0316139	655	-2.94853	230	2.86631e-05	183	2.96385e-05	103	0.0142811	103	0.0142811
LARP7	167	0.00432248	977	1	59	7.98203e-05	1533	-6.54444e-05	1702	-0.000413585	883	-0.0301278	600	-2.84048	112	0.000151958	99	0.000127447	58	0.0180485	58	0.0180485
SAP30	168	0.00433385	273	0.126503	298	0.0330455	149	0.000256052	130	0.0021245	742	-0.029443	873	-3.32981	247	2.39704e-05	211	2.08991e-05	415	0.00409315	415	0.00409315
HOXA6	169	0.00446245	977	1	95	0.000392354	1837	-0.00149441	147	0.00168375	861	-0.0300394	1396	-4.20867	107	0.000159923	93	0.000136311	74	0.016718	74	0.016718
TARDBP	170	0.00449501	883	0.884638	119	0.000880256	1852	-0.00180041	1661	-0.000277339	850	-0.030001	118	-1.33373	84	0.000218807	63	0.000253336	163	0.0111388	163	0.0111388
PYGO2	171	0.00460587	145	0.0316378	317	0.044165	11	0.00572752	75	0.00439678	253	-0.0242582	1011	-3.52141	117	0.000144138	107	0.000102413	1510	-0.00526529	1510	-0.00526529
GTF3C1	172	0.00470806	977	1	121	0.000916994	1419	-2.51494e-05	1610	-0.000169961	147	-0.0213367	1272	-3.98354	240	2.62541e-05	229	1.66816e-05	56	0.0182047	56	0.0182047
MGA	173	0.00483165	433	0.320392	229	0.0102025	322	4.73585e-05	296	0.00032006	575	-0.0284108	1280	-3.99979	288	1.56467e-05	374	1.3822e-06	413	0.00410093	413	0.00410093
NME2	174	0.00501887	499	0.397841	232	0.0104785	215	0.000112346	408	0.000146773	623	-0.0287683	1891	-7.05347	236	2.68069e-05	195	2.58792e-05	143	0.0119515	143	0.0119515
POLR3C	175	0.00504276	332	0.204243	124	0.000974361	136	0.000289414	682	2.27699e-05	435	-0.0271112	926	-3.40266	162	7.25249e-05	194	2.63547e-05	243	0.00806301	243	0.00806301
ASXL3	176	0.00505893	237	0.0926741	347	0.063181	166	0.000211682	324	0.000272058	760	-0.0295719	714	-3.05282	172	6.57029e-05	170	3.95627e-05	659	0.000912034	659	0.000912034
MYOD1	177	0.00512131	682	0.62867	144	0.0016584	359	3.63073e-05	325	0.000270278	1894	-0.0363587	1179	-3.8048	204	4.01184e-05	197	2.54165e-05	77	0.0164265	77	0.0164265
QSER1	178	0.00536332	977	1	139	0.00148707	1706	-0.000300417	1816	-0.00143735	504	-0.0279444	187	-1.75046	103	0.000170428	147	5.34037e-05	265	0.00747315	265	0.00747315
KLF7	179	0.00549912	169	0.0454499	278	0.0259116	143	0.000268552	148	0.00157845	363	-0.0263771	636	-2.91895	1877	-0.000356908	1853	-0.000306434	227	0.00843492	227	0.00843492
HDAC2	180	0.00554242	977	1	61	0.00010384	1564	-8.49438e-05	584	4.72396e-05	1108	-0.0310078	333	-2.24683	154	8.23102e-05	146	5.55913e-05	28	0.0268828	28	0.0268828
F2RL1	181	0.00595536	255	0.10388	338	0.0599082	223	0.000103649	347	0.000234149	707	-0.0292681	782	-3.16146	318	9.51621e-06	282	7.30285e-06	337	0.00568921	337	0.00568921
SATB1	182	0.00616285	836	0.824138	133	0.00116365	1909	-0.00444707	1925	-0.0106242	117	-0.0196674	421	-2.49383	27	0.000815056	29	0.000494996	252	0.00774342	252	0.00774342
SMARCC2	183	0.00659656	614	0.524153	69	0.000137374	400	2.78297e-05	406	0.000147041	1409	-0.0319931	691	-3.00429	163	7.24864e-05	127	7.14648e-05	32	0.0251339	32	0.0251339
ZNF112	184	0.00661873	977	1	66	0.000125362	1515	-5.42768e-05	1707	-0.000424911	712	-0.0292862	1321	-4.06365	160	7.50046e-05	125	7.3151e-05	40	0.023251	40	0.023251
H2BK12ac	185	0.00681265	977	1	67	0.000129269	1668	-0.000204033	1745	-0.0006343	736	-0.0294107	1227	-3.90233	94	0.000191939	103	0.000111465	46	0.0205496	46	0.0205496
Pan-acetyllysine	186	0.00735418	977	1	158	0.00232558	1595	-0.000109333	1737	-0.000594249	380	-0.0265804	495	-2.64622	192	5.01283e-05	161	4.44962e-05	147	0.0116024	147	0.0116024
ZNF335	186	0.00735418	780	0.746649	158	0.00232558	1760	-0.000496729	382	0.000182245	397	-0.0267345	1677	-4.95065	137	0.000108257	155	4.58265e-05	305	0.00650449	305	0.00650449
ZNF84	188	0.00821898	375	0.25516	271	0.0225312	1496	-4.65685e-05	529	6.79365e-05	421	-0.0269663	497	-2.65106	222	3.17418e-05	296	5.80247e-06	340	0.0056635	340	0.0056635
FOXL2	189	0.00863984	476	0.37523	175	0.00307275	1840	-0.00156586	1847	-0.00226762	268	-0.0246533	219	-1.88143	428	1.36018e-06	240	1.40264e-05	210	0.00885844	210	0.00885844
PPARG	190	0.00904503	391	0.271338	247	0.0140752	1697	-0.000273385	420	0.000135599	308	-0.0252925	541	-2.72696	260	2.09687e-05	1349	-4.57573e-06	176	0.0103518	176	0.0103518
LBX2	191	0.00913514	251	0.100496	227	0.0100088	76	0.000626288	132	0.00203175	823	-0.0298731	832	-3.26064	158	7.67103e-05	1594	-3.2159e-05	276	0.00714425	276	0.00714425
ZC3H8	192	0.00924555	977	1	74	0.000178981	1475	-3.88415e-05	1716	-0.000457963	367	-0.0264434	1248	-3.93413	123	0.000135609	104	0.000109456	53	0.0186693	53	0.0186693
ZNF711	193	0.00943489	461	0.355266	230	0.0102555	1755	-0.000460338	96	0.00306882	260	-0.024464	1692	-5.01937	136	0.000109798	178	3.36936e-05	395	0.00436557	395	0.00436557
HMGXB4	194	0.00955822	544	0.448022	147	0.00171884	1801	-0.000805555	1853	-0.00247542	57	-0.0136204	1622	-4.77476	248	2.35224e-05	175	3.43459e-05	208	0.00888797	208	0.00888797
USF2	195	0.00974089	48	0.00184421	913	1	14	0.00458329	23	0.0185454	96	-0.0181155	912	-3.37927	1933	-0.0013988	1938	-0.00194396	1724	-0.0107943	1724	-0.0107943
NR5A1	196	0.00989967	977	1	76	0.000198413	1681	-0.000227361	1800	-0.00117464	398	-0.0267503	1145	-3.73996	93	0.000193666	75	0.000186241	117	0.0134929	117	0.0134929
H4K20me1	197	0.0100015	667	0.611872	201	0.00617677	445	2.18875e-05	1722	-0.000509799	733	-0.0293947	490	-2.64123	253	2.25415e-05	239	1.43524e-05	127	0.0126436	127	0.0126436
IRF3	198	0.0100127	98	0.0103357	369	0.0918116	1930	-0.00841031	1939	-0.0252225	12	0.000894105	41	2.38302	1941	-0.00182627	1940	-0.00225209	1087	-0.000694495	1087	-0.000694495
H3K27M	199	0.0100587	977	1	63	0.000115708	1370	-1.79317e-05	1773	-0.000858986	399	-0.0267525	1648	-4.83931	199	4.16549e-05	157	4.5725e-05	95	0.0148086	95	0.0148086
NCAPG	200	0.0102199	366	0.240445	234	0.0108931	210	0.000117345	589	4.41128e-05	1776	-0.0337152	208	-1.83061	299	1.24527e-05	272	8.44606e-06	131	0.0124081	131	0.0124081
CREB1	201	0.0105485	977	1	64	0.000117901	1543	-7.08131e-05	412	0.000139203	578	-0.0284363	1708	-5.08909	113	0.000151925	121	8.11105e-05	73	0.0168333	73	0.0168333
ZNF691	202	0.0107611	322	0.196266	270	0.0218362	201	0.000128143	257	0.00045531	1259	-0.0315506	481	-2.6208	279	1.70586e-05	260	9.87958e-06	237	0.00816699	237	0.00816699
HAND1	203	0.0108859	623	0.545945	236	0.0114251	331	4.53648e-05	1527	-8.17991e-05	1491	-0.0322527	273	-2.08162	271	1.94056e-05	236	1.49223e-05	132	0.0123974	132	0.0123974
CDK9	204	0.011107	977	1	79	0.000217783	1603	-0.000115233	1282	-6.81543e-06	1734	-0.0333579	1356	-4.13602	179	5.78126e-05	140	5.89538e-05	41	0.023058	41	0.023058
ZNF460	204	0.011107	977	1	180	0.0037518	1770	-0.00056929	1862	-0.00280211	179	-0.0224924	804	-3.19641	1886	-0.000419535	1858	-0.000320703	90	0.0153353	90	0.0153353
CEBPA	206	0.0115383	30	0.00062814	913	1	1018	-5.10587e-07	1198	-2.56892e-06	6	0.0235021	10	23.2394	591	0	556	0	887	-6.5425e-30	887	-6.5425e-30
AML1-ETO	207	0.0123328	395	0.274464	309	0.039437	408	2.70165e-05	680	2.29881e-05	997	-0.0305745	288	-2.12556	301	1.20804e-05	256	1.07155e-05	294	0.00667653	294	0.00667653
XBP1	208	0.012602	102	0.0125284	616	0.52971	58	0.000894161	85	0.00366777	184	-0.0226759	1270	-3.98054	1905	-0.000680614	1894	-0.000654298	1873	-0.0210694	1873	-0.0210694
ZNF740	209	0.0127084	823	0.801319	193	0.00472659	1707	-0.000300724	1761	-0.000722934	414	-0.026904	207	-1.82853	91	0.000199644	119	8.39813e-05	382	0.00461051	382	0.00461051
ZNF146	210	0.013031	260	0.108196	194	0.00483241	233	9.56948e-05	738	1.49229e-05	289	-0.0249901	790	-3.1663	53	0.000406392	61	0.00027154	1595	-0.00699407	1595	-0.00699407
DNMT3A	211	0.0132773	525	0.432214	301	0.0343294	1692	-0.000258665	153	0.00143737	290	-0.0249908	1539	-4.5432	1865	-0.000292774	1854	-0.000308655	290	0.00675815	290	0.00675815
MEIS2	212	0.0137811	977	1	122	0.00092401	1508	-5.24173e-05	1713	-0.000447641	200	-0.0231527	1657	-4.8747	140	0.000107253	118	8.52658e-05	83	0.0158296	83	0.0158296
A	213	0.0139232	233	0.0895867	356	0.0735435	1947	-2.12471	1947	-4.26968	1948	-0.712256	11	22.4907	1948	-0.00347141	1948	-0.00705036	1948	-0.375373	1948	-0.375373
THAP8	214	0.0141318	373	0.251208	341	0.0608248	266	7.33184e-05	407	0.000146925	1310	-0.031683	526	-2.70714	344	7.88655e-06	364	1.66214e-06	211	0.00884792	211	0.00884792
TFAP4	215	0.0143	60	0.0035834	486	0.283521	13	0.00463799	24	0.0171101	294	-0.0250949	1913	-7.84624	1780	-0.000124782	1642	-4.80143e-05	292	0.00673973	292	0.00673973
ZNF75A	216	0.0145561	376	0.257265	248	0.0142353	193	0.000148491	421	0.000134156	968	-0.0304473	981	-3.47772	365	4.37055e-06	355	1.91435e-06	126	0.0126509	126	0.0126509
RNASEH2A	217	0.0145652	868	0.869182	164	0.00250542	288	6.44676e-05	869	5.00647e-06	1330	-0.0317659	750	-3.10603	294	1.36834e-05	237	1.46515e-05	87	0.0154685	87	0.0154685
RIOK2	218	0.0147743	747	0.706901	178	0.00355111	184	0.000172765	1690	-0.00038273	775	-0.0296298	424	-2.49778	241	2.61387e-05	235	1.51561e-05	88	0.0154575	88	0.0154575
MED1	219	0.0148342	977	1	167	0.00254693	1846	-0.0016924	1857	-0.0025995	226	-0.0238158	1459	-4.33061	39	0.000580206	33	0.000464867	296	0.00663759	296	0.00663759
H3K14ac	220	0.0149461	784	0.759414	174	0.00285935	1856	-0.00183954	1906	-0.00613836	191	-0.022966	401	-2.44646	120	0.000137693	53	0.0003086	1813	-0.0152491	1813	-0.0152491
NKX2-1	220	0.0149461	734	0.68955	213	0.00706641	1919	-0.00593063	1903	-0.00579306	90	-0.0177708	450	-2.5623	1908	-0.000731183	1886	-0.000520544	122	0.0129743	122	0.0129743
DEAF1	222	0.0156286	562	0.467256	186	0.0043115	163	0.000215335	303	0.000308545	901	-0.0301839	1342	-4.11063	168	6.77903e-05	154	4.69789e-05	238	0.00814437	238	0.00814437
PBX4	223	0.0156727	567	0.470508	215	0.00735399	1881	-0.00256943	1911	-0.00712964	60	-0.0141493	1557	-4.58492	1860	-0.000278477	64	0.000243916	193	0.00965078	193	0.00965078
H1.0	224	0.015906	977	1	99	0.00043414	1717	-0.000337125	1775	-0.000868963	372	-0.0264726	1757	-5.31219	191	5.03952e-05	166	4.11569e-05	64	0.0176521	64	0.0176521
KLF5	225	0.016046	977	1	169	0.00271558	1782	-0.000664002	1629	-0.000208352	194	-0.0229963	999	-3.50396	1870	-0.000319903	1696	-7.24841e-05	69	0.0173756	69	0.0173756
RAC1	226	0.0161406	164	0.0446078	402	0.145152	65	0.000739022	90	0.0033666	285	-0.0249455	1881	-6.83094	1872	-0.000324514	1789	-0.000143887	300	0.00657348	300	0.00657348
ZNF213	227	0.0167574	977	1	89	0.000335867	1379	-1.8923e-05	1708	-0.000428548	434	-0.0271028	1033	-3.55248	111	0.00015226	90	0.000146596	109	0.0137643	109	0.0137643
H2BK120ub	228	0.0172926	179	0.0523537	260	0.017031	94	0.000426444	81	0.00399651	782	-0.0296969	1417	-4.2422	237	2.65514e-05	316	4.2424e-06	323	0.0061178	323	0.0061178
E2F2	229	0.0176088	160	0.0411345	256	0.016449	83	0.000527209	67	0.00460903	1808	-0.033928	1518	-4.50045	227	2.93156e-05	209	2.14395e-05	436	0.00376206	436	0.00376206
ZNF71	230	0.0183806	571	0.480993	254	0.0156837	308	5.55066e-05	1171	-1.72106e-06	152	-0.0215181	1606	-4.742	243	2.5097e-05	210	2.10578e-05	205	0.00896651	205	0.00896651
CXXC1	231	0.018647	554	0.45637	261	0.0171813	1699	-0.000281131	1726	-0.000517378	288	-0.0249644	299	-2.16487	1504	-1.38834e-05	152	5.05123e-05	262	0.00751066	262	0.00751066
LCOR	231	0.018647	406	0.291054	261	0.0171813	1808	-0.000933308	135	0.002	233	-0.0239345	1694	-5.03559	106	0.000161019	81	0.000176511	440	0.0037131	440	0.0037131
APC	233	0.0197283	977	1	187	0.00440101	1428	-2.75747e-05	602	4.01331e-05	1348	-0.0318158	521	-2.69718	194	4.70101e-05	188	2.80495e-05	246	0.00801671	246	0.00801671
ZFP91	234	0.0207276	516	0.424029	267	0.0214518	1676	-0.000214629	293	0.000324808	638	-0.0288784	368	-2.36318	212	3.51166e-05	259	1.02417e-05	311	0.00632648	311	0.00632648
HES4	235	0.0208735	297	0.161051	283	0.0266418	128	0.000298585	1306	-8.33957e-06	448	-0.0272628	349	-2.29525	1643	-3.7068e-05	1742	-0.000102006	212	0.00882084	212	0.00882084
BATF	236	0.0210217	883	0.884638	156	0.00219606	1918	-0.00576448	1924	-0.010603	118	-0.0197881	1772	-5.441	31	0.000706473	38	0.000440437	332	0.00578651	332	0.00578651
SMARCA4	237	0.0215357	977	1	102	0.000444571	1679	-0.000220558	1508	-6.61868e-05	379	-0.0265698	1073	-3.62312	129	0.00012282	112	9.74116e-05	195	0.00956867	195	0.00956867
IRF8	238	0.0219154	150	0.0357778	414	0.152265	242	9.0499e-05	264	0.000416674	709	-0.0292762	171	-1.65783	252	2.28327e-05	312	4.46028e-06	1044	-0.000466394	1044	-0.000466394
POLQ	239	0.0223721	199	0.0648187	380	0.109812	45	0.00120042	105	0.00269254	326	-0.0256592	1302	-4.02506	1552	-2.05927e-05	262	9.851e-06	275	0.00720507	275	0.00720507
INTS12	240	0.0229956	977	1	68	0.000134247	1727	-0.000358647	1703	-0.000415452	455	-0.0274051	925	-3.40208	60	0.000335836	68	0.000232146	144	0.011713	144	0.011713
HJURP	241	0.023253	818	0.791564	153	0.00215531	1661	-0.000193339	471	9.4454e-05	810	-0.0298294	684	-2.99725	207	3.65686e-05	165	4.16067e-05	79	0.0162428	79	0.0162428
ZNF143	242	0.0234796	280	0.134653	384	0.118455	1826	-0.00118597	1684	-0.000358994	38	-0.0097349	154	-1.55621	211	3.52604e-05	149	5.30822e-05	1203	-0.00144158	1203	-0.00144158
MEAF6	243	0.0237202	977	1	167	0.00254693	502	1.51641e-05	1552	-0.000102568	1439	-0.0321387	323	-2.2214	187	5.22391e-05	167	4.06056e-05	99	0.0146615	99	0.0146615
DIDO1	243	0.0237202	294	0.155112	328	0.0512283	39	0.00148321	166	0.00117393	534	-0.0281858	1554	-4.57669	1619	-3.23184e-05	1531	-2.11893e-05	142	0.0119887	142	0.0119887
CRTC2	245	0.0252535	786	0.759545	297	0.0328956	497	1.55628e-05	1379	-1.58448e-05	797	-0.0297779	516	-2.69083	295	1.33431e-05	280	7.35434e-06	201	0.00927796	201	0.00927796
HBP1	246	0.0257103	308	0.177598	426	0.167578	464	1.99593e-05	451	0.000111266	1006	-0.0306081	149	-1.51914	419	1.57389e-06	380	1.12483e-06	462	0.00334874	462	0.00334874
HMGB1	247	0.0257478	977	1	184	0.00418858	1694	-0.000263152	1662	-0.000279661	218	-0.0234667	704	-3.02906	219	3.31812e-05	206	2.17399e-05	301	0.0065464	301	0.0065464
ZNF34	248	0.0267742	14	7.00142e-05	913	1	126	0.000309549	126	0.00235095	104	-0.0186473	35	3.22877	366	4.29075e-06	1569	-2.79892e-05	1571	-0.00628474	1571	-0.00628474
ZNF543	249	0.0274377	479	0.377919	205	0.00665338	407	2.71548e-05	566	5.23159e-05	1080	-0.0308992	875	-3.33286	261	2.06914e-05	222	1.72019e-05	111	0.0136769	111	0.0136769
SCRT2	250	0.027466	977	1	189	0.00444142	1415	-2.47668e-05	1367	-1.37705e-05	297	-0.0251095	1565	-4.61455	306	1.10398e-05	281	7.31209e-06	98	0.0147083	98	0.0147083
MCRS1	251	0.0277681	105	0.0134399	632	0.561181	230	9.72991e-05	377	0.000192416	432	-0.0270975	469	-2.6034	330	8.695e-06	311	4.46857e-06	1492	-0.00492789	1492	-0.00492789
ZBTB25	252	0.0281376	534	0.436575	135	0.00125656	390	2.89786e-05	1592	-0.000148257	470	-0.0275785	645	-2.9339	190	5.09944e-05	212	2.0713e-05	92	0.0151645	92	0.0151645
SP3	253	0.0283581	397	0.279722	321	0.0463153	182	0.000175422	228	0.000548853	1835	-0.0342315	1730	-5.18223	329	8.72008e-06	334	2.84109e-06	255	0.00764726	255	0.00764726
CDT1	254	0.0284085	27	0.00043444	913	1	59	0.000893607	59	0.00557644	1807	-0.0339262	18	7.91804	1368	-3.87409e-06	1453	-1.16554e-05	1565	-0.00618873	1565	-0.00618873
CBX1	255	0.0288126	59	0.00349851	913	1	48	0.00114222	70	0.00450538	160	-0.0218787	335	-2.2545	1840	-0.000213902	1757	-0.000113045	1818	-0.015632	1818	-0.015632
ETV3	256	0.0292703	385	0.264162	274	0.024237	1481	-4.0224e-05	1600	-0.000156442	221	-0.0236445	186	-1.73176	157	7.67179e-05	1587	-3.13961e-05	406	0.0042066	406	0.0042066
STAT3	257	0.0292728	977	1	160	0.00234469	1430	-2.79733e-05	336	0.000255063	1556	-0.0324823	1729	-5.17354	291	1.46007e-05	243	1.32239e-05	80	0.0161991	80	0.0161991
H4K5K8K16ac	258	0.0297387	208	0.0720921	450	0.22599	1858	-0.00195956	19	0.0207145	337	-0.0258461	194	-1.789	1705	-6.56343e-05	1483	-1.38722e-05	268	0.00737426	268	0.00737426
SKP2	259	0.0313357	977	1	109	0.000668833	1686	-0.000249224	1717	-0.000463653	1578	-0.0325816	553	-2.75139	133	0.00011541	225	1.6929e-05	65	0.0175476	65	0.0175476
ZNF488	260	0.0314957	364	0.238896	381	0.111932	528	1.27515e-05	923	2.49944e-06	963	-0.0304289	221	-1.88659	400	2.52104e-06	367	1.54951e-06	281	0.00697834	281	0.00697834
COPS2	261	0.0321563	185	0.0552254	490	0.29889	92	0.000436538	156	0.00140217	307	-0.0252788	1796	-5.68732	1640	-3.6625e-05	1643	-4.8103e-05	264	0.00747509	264	0.00747509
TRMT13	261	0.0321563	175	0.049169	483	0.278445	46	0.00117759	91	0.00324062	1746	-0.033422	342	-2.27834	263	2.02927e-05	271	8.49132e-06	1419	-0.00371574	1419	-0.00371574
ZNF737	263	0.0326578	344	0.218476	348	0.0639256	1538	-6.86304e-05	281	0.000365422	500	-0.0278847	325	-2.22442	296	1.31919e-05	343	2.37577e-06	230	0.00833637	230	0.00833637
H4K5K8K12ac	264	0.0328927	977	1	136	0.00135984	1645	-0.000161444	1786	-0.000950949	482	-0.0277294	855	-3.29255	151	8.63246e-05	150	5.20507e-05	360	0.00519454	360	0.00519454
Pan lysine crotonylation	265	0.0335419	173	0.0489784	457	0.24222	307	5.6138e-05	492	8.38556e-05	560	-0.028322	648	-2.93841	445	9.20427e-07	455	1.97884e-07	497	0.00285434	497	0.00285434
NEUROD2	266	0.033745	621	0.544055	220	0.00891195	190	0.000151062	366	0.000211275	1183	-0.0313198	1020	-3.53356	284	1.63735e-05	223	1.7054e-05	209	0.00886184	209	0.00886184
NFATC1	267	0.0344932	507	0.414146	258	0.0165943	472	1.82199e-05	743	1.44469e-05	737	-0.0294138	1105	-3.6705	239	2.64417e-05	234	1.53816e-05	171	0.0107551	171	0.0107551
FMR1	268	0.0346152	977	1	269	0.0218267	1613	-0.000126845	486	8.67048e-05	465	-0.0275535	1647	-4.83853	198	4.25232e-05	257	1.04565e-05	168	0.0109182	168	0.0109182
PAX5	269	0.0350534	176	0.0501989	397	0.13342	509	1.37051e-05	456	0.000108032	652	-0.0289552	223	-1.88918	420	1.40881e-06	369	1.48368e-06	309	0.00641975	309	0.00641975
ZNF19	270	0.0350571	806	0.781238	275	0.0247272	1295	-1.01731e-05	284	0.000359009	487	-0.0277769	820	-3.23194	402	2.41694e-06	342	2.44032e-06	148	0.0115493	148	0.0115493
ZNF423	270	0.0350571	977	1	259	0.0169959	1622	-0.000129799	487	8.60356e-05	312	-0.0253524	1444	-4.30064	332	8.66228e-06	286	7.08179e-06	336	0.00572798	336	0.00572798
SMC1A	272	0.0358304	977	1	172	0.0028146	1708	-0.000303762	1768	-0.000797934	654	-0.0289645	595	-2.83691	161	7.35873e-05	124	7.32599e-05	181	0.0101557	181	0.0101557
ESRRG	273	0.0359304	977	1	113	0.000776968	1490	-4.49864e-05	1431	-3.0353e-05	860	-0.0300335	1541	-4.54679	130	0.000120501	117	8.74229e-05	138	0.012164	138	0.012164
H3K14cr	274	0.0362242	177	0.0511292	447	0.217562	253	7.9979e-05	438	0.000121726	655	-0.0289676	602	-2.85221	464	5.649e-07	434	3.81016e-07	482	0.00314661	482	0.00314661
HIVEP1	275	0.0365737	32	0.000634202	913	1	18	0.00376306	17	0.024416	220	-0.0235785	67	-0.341189	1785	-0.000129626	1773	-0.000130621	1712	-0.0102789	1712	-0.0102789
FOXJ3	275	0.0365737	50	0.00202401	913	1	12	0.00557219	18	0.0242105	144	-0.0211939	540	-2.72506	1760	-9.95921e-05	1872	-0.000426581	1272	-0.00202027	1272	-0.00202027
H4K20me3	277	0.0366256	977	1	251	0.0150713	1860	-0.00201903	1860	-0.00275734	154	-0.0216378	1682	-4.96333	98	0.00018239	123	7.42298e-05	1751	-0.0121157	1751	-0.0121157
TBL1XR1	278	0.0373308	977	1	114	0.00081027	1615	-0.000127119	1664	-0.000281593	800	-0.0297853	735	-3.08095	234	2.74829e-05	215	1.93402e-05	55	0.0182175	55	0.0182175
PBX3	278	0.0373308	977	1	183	0.00402691	1781	-0.000655008	1815	-0.00141937	234	-0.0239683	721	-3.06069	1671	-4.69193e-05	1829	-0.000212119	165	0.0109452	165	0.0109452
ZNF346	280	0.037369	134	0.0255475	720	0.702295	1716	-0.000333562	65	0.00477728	36	-0.00914502	682	-2.99464	1899	-0.00059153	1907	-0.0008373	693	0.000626585	693	0.000626585
ZSCAN5B	281	0.0380233	843	0.834444	315	0.044114	518	1.34372e-05	474	9.2457e-05	1433	-0.0321111	827	-3.24904	320	9.33814e-06	251	1.13752e-05	307	0.00645813	307	0.00645813
MTA2	282	0.0385876	28	0.000571772	872	0.942878	157	0.000228618	213	0.000652568	159	-0.0218675	50	1.01071	1235	-8.80515e-07	1431	-9.84965e-06	354	0.005303	354	0.005303
5-hmC	283	0.0391451	293	0.153367	430	0.171839	707	3.5239e-06	862	5.32084e-06	547	-0.0282378	130	-1.39441	554	3.71969e-08	429	4.0123e-07	231	0.00829768	231	0.00829768
GTF2E2	284	0.0392432	977	1	142	0.00163496	1366	-1.7303e-05	262	0.000424674	1152	-0.0311929	1832	-6.07513	213	3.46228e-05	163	4.30749e-05	429	0.00387129	429	0.00387129
MAML3	285	0.0395072	57	0.00314615	885	0.955386	88	0.000485526	115	0.00252514	85	-0.0175505	399	-2.43891	1764	-0.00010201	1792	-0.00015525	1834	-0.0168917	1834	-0.0168917
MAPK14	286	0.0399346	762	0.72762	222	0.00941079	1597	-0.000112474	191	0.000831065	391	-0.0267033	1741	-5.2128	104	0.000167716	85	0.000160557	664	0.000841418	664	0.000841418
GLYR1	287	0.0402263	977	1	98	0.000410766	1680	-0.000224151	1744	-0.000624889	498	-0.0278648	1608	-4.7479	189	5.10178e-05	358	1.80324e-06	150	0.0114354	150	0.0114354
ZSCAN4	288	0.0402533	977	1	100	0.000436431	1720	-0.000348595	1715	-0.000456683	803	-0.0298015	1282	-4.00062	148	9.30461e-05	122	7.51764e-05	68	0.0174277	68	0.0174277
MNT	289	0.040342	977	1	195	0.00487214	1599	-0.000113488	1785	-0.000949285	1850	-0.0344358	357	-2.33424	242	2.56326e-05	218	1.86365e-05	124	0.0126923	124	0.0126923
PAF1	290	0.040397	977	1	149	0.00187756	1794	-0.000760151	1858	-0.00263298	445	-0.0272309	1395	-4.20599	141	0.000102728	1317	-3.17036e-06	140	0.0121191	140	0.0121191
SP2	291	0.0407252	977	1	225	0.0096474	1458	-3.41922e-05	300	0.000317153	1713	-0.0332302	499	-2.65554	289	1.56364e-05	1693	-7.11889e-05	129	0.0124846	129	0.0124846
OLIG2	292	0.0410097	977	1	120	0.000898476	1486	-4.36315e-05	1491	-5.57706e-05	1606	-0.0326848	758	-3.11554	229	2.88064e-05	202	2.33059e-05	81	0.015899	81	0.015899
DNAJC2	293	0.0412399	182	0.0534359	302	0.0346194	43	0.0012489	95	0.00308065	667	-0.0290521	1439	-4.29328	174	6.4876e-05	1636	-4.62925e-05	280	0.00700221	280	0.00700221
ZNF316	294	0.0415457	92	0.00889693	358	0.0755548	16	0.00427469	38	0.00998355	629	-0.0287955	1139	-3.73141	275	1.83668e-05	1552	-2.47114e-05	359	0.00519725	359	0.00519725
WDR5	295	0.0424359	446	0.335722	375	0.0998534	252	7.9983e-05	1936	-0.0194495	62	-0.0144196	1025	-3.54149	1888	-0.000440879	1910	-0.00094262	1864	-0.0198189	1864	-0.0198189
CTSG	296	0.0435068	688	0.63384	324	0.0486075	743	2.14595e-06	428	0.00012656	1628	-0.0327994	397	-2.4267	331	8.67585e-06	372	1.44881e-06	333	0.00575168	333	0.00575168
LYL1	297	0.0439233	508	0.415195	325	0.0489425	579	9.66692e-06	505	7.94194e-05	633	-0.0288425	1265	-3.97661	269	1.94932e-05	220	1.77868e-05	358	0.00519814	358	0.00519814
ZNF280D	298	0.0446775	107	0.0141875	601	0.500409	115	0.000351246	128	0.00227625	192	-0.0229739	976	-3.47361	1677	-4.89829e-05	1707	-7.74103e-05	364	0.00511538	364	0.00511538
MTOR	299	0.0457725	977	1	128	0.00101415	1587	-9.74774e-05	1591	-0.00014761	879	-0.0301093	1221	-3.89044	170	6.76161e-05	185	2.87427e-05	84	0.0157713	84	0.0157713
RXRB	300	0.0458437	977	1	263	0.0199902	1854	-0.00181224	1883	-0.00382843	146	-0.0213174	1834	-6.1069	59	0.000341579	36	0.0004568	1084	-0.000677577	1084	-0.000677577
MLLT3	301	0.0473126	705	0.656048	266	0.0208824	1502	-4.89104e-05	290	0.000328738	368	-0.0264631	1540	-4.54603	1556	-2.13606e-05	238	1.44979e-05	233	0.00825729	233	0.00825729
JMJD6	301	0.0473126	896	0.891442	214	0.00729801	1725	-0.00035637	1809	-0.00132332	119	-0.0198127	1380	-4.17045	167	6.8476e-05	120	8.36805e-05	368	0.00500486	368	0.00500486
NCOA1	303	0.0479088	107	0.0141875	544	0.379341	1878	-0.00249119	192	0.000830596	14	-0.000796345	71	-0.416395	1911	-0.000778016	1881	-0.000474863	465	0.0033318	465	0.0033318
ZNF704	304	0.0493453	82	0.00674924	913	1	42	0.00128025	149	0.00157342	99	-0.0183696	1348	-4.12511	1738	-8.47941e-05	1669	-5.91822e-05	660	0.000903717	660	0.000903717
SUPT6H	305	0.0493669	712	0.662182	365	0.0851899	1510	-5.25864e-05	370	0.000205744	209	-0.0233029	1347	-4.12368	357	6.3768e-06	359	1.80106e-06	371	0.004944	371	0.004944
HMGA2	306	0.0494123	748	0.708735	303	0.0353834	1677	-0.000216271	1663	-0.000279809	385	-0.0266329	195	-1.79169	250	2.33142e-05	307	4.66831e-06	315	0.00628021	315	0.00628021
ZSCAN22	306	0.0494123	73	0.00531956	913	1	36	0.00173668	117	0.00251278	365	-0.0264244	372	-2.37509	1781	-0.000125888	1836	-0.000232203	515	0.00260643	515	0.00260643
RUNX2	308	0.0498251	144	0.0311934	913	1	1929	-0.00809416	1933	-0.0176248	50	-0.0116607	72	-0.427442	1847	-0.000228869	1862	-0.000342287	1234	-0.00167287	1234	-0.00167287
FANCD2	309	0.0500451	37	0.00108509	913	1	86	0.000518624	119	0.00247507	250	-0.0242325	193	-1.78514	1850	-0.000234326	1869	-0.00040083	1166	-0.00117807	1166	-0.00117807
HEXIM1	310	0.0505958	977	1	233	0.0107167	1868	-0.00214054	1871	-0.00311778	335	-0.0257948	517	-2.69134	203	4.02089e-05	1715	-8.128e-05	192	0.00969465	192	0.00969465
C10orf12	311	0.0514124	586	0.494616	392	0.131154	368	3.34285e-05	1500	-6.22793e-05	676	-0.0291507	663	-2.9623	374	3.79587e-06	418	5.2906e-07	397	0.00435838	397	0.00435838
TRIM25	312	0.0517881	637	0.56672	281	0.0261659	1877	-0.00247018	1926	-0.0106668	73	-0.0160084	1508	-4.4584	1944	-0.00290522	1942	-0.00284928	1937	-0.0366778	1937	-0.0366778
BCL11A	313	0.0536827	977	1	219	0.00819754	1742	-0.000400637	1790	-0.00105262	345	-0.0259719	1055	-3.59292	83	0.000222954	86	0.000154101	377	0.00474131	377	0.00474131
TRIP13	314	0.0544295	597	0.509937	334	0.0560587	240	9.09298e-05	1164	-1.49977e-06	1009	-0.0306221	378	-2.39495	317	9.59269e-06	295	5.8233e-06	349	0.00542567	349	0.00542567
CSDE1	315	0.0546754	977	1	185	0.0042507	1769	-0.000554883	1770	-0.00080808	437	-0.0271301	694	-3.00617	135	0.000112033	130	6.65911e-05	329	0.00596537	329	0.00596537
WIZ	316	0.0549189	714	0.665251	243	0.012808	264	7.37003e-05	524	7.05932e-05	1227	-0.0314466	1244	-3.92283	268	1.95482e-05	228	1.67178e-05	156	0.0113767	156	0.0113767
HCFC1	317	0.05556	977	1	134	0.00121414	1650	-0.000170026	1678	-0.000335093	836	-0.0299299	525	-2.70596	152	8.48713e-05	158	4.53727e-05	125	0.0126872	125	0.0126872
WWTR1	318	0.0558006	977	1	239	0.0119532	1590	-0.000104142	1602	-0.00015839	586	-0.0284636	696	-3.01126	281	1.69231e-05	198	2.49596e-05	257	0.00761371	257	0.00761371
SOX3	319	0.05655	156	0.0389682	476	0.268912	229	9.74315e-05	416	0.000137169	570	-0.0283904	612	-2.87952	348	7.23025e-06	319	3.92589e-06	1059	-0.000585066	1059	-0.000585066
H2A.ZK4K7ac	320	0.0567183	738	0.696227	307	0.037994	1548	-7.37092e-05	381	0.000185254	113	-0.0195579	771	-3.1462	278	1.72657e-05	293	5.97352e-06	1598	-0.0070373	1598	-0.0070373
PBXIP1	321	0.0574853	148	0.0334793	670	0.609448	208	0.000118564	1513	-6.96099e-05	258	-0.0244508	124	-1.35495	182	5.65711e-05	1735	-9.38084e-05	1422	-0.00374407	1422	-0.00374407
LHX5	322	0.0590332	302	0.165809	474	0.266844	122	0.000325862	172	0.00112	889	-0.0301547	761	-3.12141	302	1.19723e-05	1166	-6.68842e-07	464	0.00333715	464	0.00333715
ZFP42	323	0.0610899	549	0.452916	472	0.263229	605	8.17409e-06	823	7.71285e-06	1130	-0.0310894	797	-3.17779	469	5.15812e-07	409	6.83247e-07	509	0.00266326	509	0.00266326
HIC1	324	0.0617199	977	1	221	0.00924199	1655	-0.000178554	1612	-0.000174498	706	-0.0292605	590	-2.82519	235	2.71168e-05	203	2.31767e-05	223	0.00852973	223	0.00852973
TAF3	325	0.0623508	977	1	148	0.00177838	1705	-0.000296483	1724	-0.000512073	664	-0.029029	1725	-5.14811	146	9.84261e-05	108	0.000100658	159	0.0113122	159	0.0113122
REST	325	0.0623508	276	0.133005	591	0.48056	1866	-0.00211227	1774	-0.000867558	61	-0.014337	153	-1.5519	1884	-0.000380342	1883	-0.000481711	1846	-0.0180078	1846	-0.0180078
POLR3B	327	0.0635783	977	1	137	0.00145993	1736	-0.000380143	1644	-0.000235018	459	-0.0274547	1314	-4.05243	147	9.6295e-05	151	5.06884e-05	248	0.00789846	248	0.00789846
CBFA2T3	327	0.0635783	104	0.0131349	913	1	1803	-0.000819816	58	0.00559576	187	-0.0228315	62	-0.0409412	1588	-2.5823e-05	1672	-5.99969e-05	1746	-0.0119584	1746	-0.0119584
PCF11	329	0.0637335	265	0.111501	504	0.316829	318	4.92602e-05	393	0.000166356	1133	-0.0311007	352	-2.30562	369	4.05687e-06	357	1.8325e-06	537	0.00230445	537	0.00230445
MKL1	330	0.0642293	977	1	177	0.00345968	1724	-0.000354128	1723	-0.000511853	649	-0.0289297	710	-3.04495	70	0.000274776	83	0.000168922	219	0.00862094	219	0.00862094
PHF19	331	0.0648893	565	0.469992	377	0.103091	262	7.51814e-05	304	0.000304984	1442	-0.0321452	1114	-3.6894	368	4.06711e-06	362	1.68664e-06	391	0.00441413	391	0.00441413
CPSF6	332	0.0655154	797	0.775457	249	0.0143053	1715	-0.000332301	1636	-0.00021441	181	-0.0225149	406	-2.4573	58	0.000352663	54	0.000308159	712	0.00046	712	0.00046
CARM1	333	0.0681517	977	1	250	0.0147943	1606	-0.000120416	1685	-0.00037321	687	-0.0291917	196	-1.79465	283	1.6603e-05	254	1.11968e-05	475	0.00324095	475	0.00324095
EBNA2	334	0.0681545	91	0.00878554	913	1	24	0.00260546	163	0.00125367	140	-0.0210788	1510	-4.46167	1728	-7.99045e-05	1717	-8.14957e-05	1617	-0.00764061	1617	-0.00764061
H4ac	335	0.0690078	977	1	278	0.0259116	1811	-0.00094707	1864	-0.00282921	203	-0.0232287	783	-3.16207	1805	-0.000152282	1685	-6.86138e-05	135	0.0122817	135	0.0122817
HOXA13	336	0.0695026	448	0.33885	401	0.138032	533	1.24674e-05	419	0.000136554	1730	-0.0333206	587	-2.82254	415	1.72134e-06	424	4.21614e-07	226	0.00844428	226	0.00844428
FOXP4	337	0.0696985	374	0.253839	518	0.33335	449	2.15935e-05	510	7.68901e-05	528	-0.0281318	1309	-4.03987	414	1.76218e-06	423	4.27121e-07	545	0.00222083	545	0.00222083
FOXC1	338	0.0704745	896	0.891442	322	0.04773	1530	-6.44729e-05	517	7.25789e-05	1057	-0.0308226	119	-1.33434	325	9.0912e-06	315	4.26822e-06	304	0.00651674	304	0.00651674
KLF10	339	0.0711284	977	1	100	0.000436431	1749	-0.000417893	1793	-0.00107786	662	-0.0290023	1638	-4.81998	86	0.000216804	84	0.000166743	225	0.00846645	225	0.00846645
NR1H3	340	0.0717677	434	0.321232	465	0.25258	324	4.65138e-05	615	3.62842e-05	350	-0.026082	1037	-3.56199	503	2.41765e-07	450	2.21075e-07	320	0.00616352	320	0.00616352
ZNF76	341	0.0727429	977	1	337	0.0589337	1825	-0.00117682	1837	-0.0020465	166	-0.0220261	811	-3.21682	88	0.000205596	110	9.83148e-05	1267	-0.00196171	1267	-0.00196171
ZBTB20	342	0.0728441	977	1	246	0.0136032	473	1.79378e-05	549	5.64903e-05	935	-0.0303188	1411	-4.23533	313	1.00774e-05	291	6.15123e-06	137	0.0122345	137	0.0122345
RBM14	343	0.0739392	575	0.483757	382	0.112946	1441	-2.95551e-05	1529	-8.27242e-05	309	-0.0253322	202	-1.81815	401	2.43288e-06	378	1.20836e-06	298	0.00661077	298	0.00661077
ERG	344	0.0740603	160	0.0411345	559	0.412701	1923	-0.0060858	1934	-0.0178999	46	-0.0111168	83	-0.74819	1937	-0.00148568	1931	-0.00142685	1836	-0.0170847	1836	-0.0170847
CBX5	345	0.0754726	365	0.23989	509	0.319761	127	0.000306377	222	0.000573771	964	-0.0304299	879	-3.33729	352	6.95834e-06	302	5.17274e-06	1195	-0.00142113	1195	-0.00142113
CHD1	346	0.0759166	859	0.857032	296	0.0326391	1883	-0.00264581	1886	-0.00421728	168	-0.0220367	431	-2.51977	37	0.000592543	47	0.000347662	1400	-0.00347661	1400	-0.00347661
SP7	347	0.0765942	486	0.384262	434	0.180702	615	7.46597e-06	565	5.23409e-05	1820	-0.0340681	197	-1.79547	528	1.03554e-07	420	4.57212e-07	240	0.00810552	240	0.00810552
PHB	348	0.0795936	43	0.00154296	840	0.88449	77	0.000626094	273	0.000392644	139	-0.021077	79	-0.652074	1609	-3.09214e-05	1482	-1.37317e-05	445	0.00362063	445	0.00362063
ZBTB16	349	0.0802863	69	0.00452587	913	1	786	1.281e-06	825	7.63199e-06	5	0.0294969	27	5.08527	1039	-6.17764e-08	1000	-7.31021e-08	1051	-0.000515065	1051	-0.000515065
POU5F1	350	0.081853	977	1	217	0.00768772	409	2.65124e-05	1419	-2.59413e-05	1855	-0.0345732	1175	-3.80151	316	9.86412e-06	270	8.54867e-06	108	0.01383	108	0.01383
LHX2	351	0.0820316	469	0.365479	519	0.336155	366	3.35771e-05	328	0.000266993	1071	-0.0308824	732	-3.07785	471	4.85273e-07	1084	-2.43358e-07	474	0.00324587	474	0.00324587
HIC2	352	0.0825451	97	0.0102845	913	1	1914	-0.0050461	78	0.00414382	172	-0.0221241	116	-1.32538	1921	-0.00100884	1920	-0.00102601	1610	-0.00737226	1610	-0.00737226
USP22	353	0.0860454	655	0.586829	388	0.125605	345	4.01311e-05	231	0.000543045	812	-0.0298347	1452	-4.31083	408	1.88499e-06	413	6.66292e-07	367	0.00502059	367	0.00502059
ZNF484	354	0.0865804	139	0.0283073	771	0.786014	406	2.72294e-05	176	0.00108539	565	-0.0283562	356	-2.32837	1546	-2.0022e-05	1554	-2.48913e-05	419	0.00396054	419	0.00396054
RBFOX2	355	0.0871187	977	1	245	0.0128441	1863	-0.00205993	1892	-0.00474252	225	-0.0237478	1391	-4.1918	85	0.000217554	91	0.000144731	414	0.00409474	414	0.00409474
RBM39	356	0.0895572	977	1	161	0.00235224	1824	-0.00116914	1832	-0.00178956	998	-0.0305753	812	-3.21704	176	6.27412e-05	138	6.01484e-05	118	0.0133498	118	0.0133498
H3K27me1	357	0.090027	977	1	153	0.00215531	1662	-0.000195216	1751	-0.000653382	426	-0.0270321	1275	-3.98892	215	3.44013e-05	164	4.23294e-05	254	0.00770751	254	0.00770751
CTBP2	358	0.0903176	426	0.311388	446	0.214406	387	2.91774e-05	569	5.15104e-05	1141	-0.0311345	493	-2.64401	480	3.76544e-07	428	4.08627e-07	293	0.00673493	293	0.00673493
ZNF132	359	0.0912717	536	0.437541	335	0.058391	161	0.000221274	292	0.000326512	1052	-0.030808	1612	-4.75662	246	2.41724e-05	250	1.1584e-05	570	0.00197657	570	0.00197657
SAFB	360	0.0913931	977	1	155	0.00219219	1632	-0.000142881	1515	-7.07327e-05	627	-0.0287877	1664	-4.89052	201	4.0906e-05	192	2.68133e-05	89	0.0153458	89	0.0153458
H3K79suc	361	0.0920762	289	0.15054	532	0.36028	613	7.67441e-06	858	5.52176e-06	678	-0.0291557	480	-2.61914	521	1.31313e-07	1103	-3.3709e-07	543	0.00224873	543	0.00224873
PRPF4	362	0.0932102	296	0.160422	651	0.586274	55	0.000949552	1757	-0.000687992	169	-0.0220623	1324	-4.06967	1910	-0.000760328	1905	-0.000779163	1773	-0.0130414	1773	-0.0130414
H3K9ac	363	0.0949214	565	0.469992	398	0.134563	1902	-0.00379529	1913	-0.00789557	122	-0.0200547	304	-2.1731	1783	-0.000126921	1761	-0.000117384	312	0.00630835	312	0.00630835
HEYL	364	0.0962254	811	0.786075	359	0.0786774	1297	-1.0447e-05	455	0.000109086	961	-0.0304258	717	-3.05451	363	4.77011e-06	322	3.5442e-06	220	0.00860456	220	0.00860456
ZNF256	365	0.0975024	232	0.0893067	537	0.372873	753	1.9908e-06	670	2.50334e-05	325	-0.0256399	483	-2.62314	474	4.51459e-07	1226	-1.20079e-06	1226	-0.00158861	1226	-0.00158861
H3K79me1	366	0.100623	236	0.0912195	729	0.722079	525	1.28574e-05	668	2.51346e-05	757	-0.0295621	319	-2.21408	591	0	556	0	578	0.00188222	578	0.00188222
STRA13	367	0.101551	121	0.0199997	766	0.778389	103	0.000388685	225	0.00056069	494	-0.0278206	518	-2.6948	338	8.32627e-06	408	7.02929e-07	1386	-0.00333828	1386	-0.00333828
RFXAP	368	0.102381	595	0.506441	548	0.383956	1162	-3.79526e-06	391	0.000168908	728	-0.0293753	386	-2.40867	1005	-2.87714e-08	1154	-5.50639e-07	958	-5.01401e-05	958	-5.01401e-05
RORC	369	0.104377	179	0.0523537	672	0.61845	56	0.000920973	94	0.00315024	1131	-0.0310914	1934	-9.59453	1786	-0.000129972	1747	-0.000105452	1930	-0.0327733	1930	-0.0327733
PHOX2B	370	0.106789	977	1	192	0.0047061	1539	-6.9237e-05	1669	-0.000301178	854	-0.0300088	932	-3.40948	185	5.35407e-05	173	3.53174e-05	120	0.0132534	120	0.0132534
ZNF274	371	0.10698	875	0.874422	252	0.015568	1332	-1.37328e-05	271	0.000396687	615	-0.028722	910	-3.3762	421	1.40726e-06	350	2.21715e-06	130	0.0124178	130	0.0124178
EPCAM	372	0.107477	702	0.652509	546	0.380232	1238	-6.87756e-06	640	3.13191e-05	1012	-0.0306321	814	-3.22328	354	6.74414e-06	1230	-1.29224e-06	396	0.0043642	396	0.0043642
EP400	373	0.109525	863	0.863651	350	0.0688466	433	2.35825e-05	322	0.000275874	1769	-0.0336575	1551	-4.56486	350	6.9735e-06	265	9.61471e-06	263	0.00750711	263	0.00750711
ZBTB5	374	0.11011	710	0.658857	543	0.378381	365	3.37792e-05	537	6.40177e-05	1241	-0.0315045	759	-3.12012	1229	-8.37235e-07	1218	-1.11298e-06	424	0.00391164	424	0.00391164
ATF2	375	0.110158	977	1	372	0.0954959	391	2.89516e-05	1595	-0.000152633	906	-0.0302055	779	-3.15558	388	2.9514e-06	310	4.46985e-06	977	-0.000107585	977	-0.000107585
OGT	376	0.110553	977	1	170	0.0027184	1410	-2.42306e-05	1318	-9.20239e-06	1607	-0.0326873	1195	-3.84062	274	1.84445e-05	182	2.96951e-05	94	0.0148731	94	0.0148731
H2A.XS139ph	377	0.112996	977	1	204	0.00665048	1654	-0.000173503	1649	-0.000245027	1149	-0.0311848	1862	-6.3833	188	5.10953e-05	186	2.85718e-05	154	0.0113951	154	0.0113951
ZNF407	378	0.113229	874	0.873604	340	0.0603266	1339	-1.39461e-05	436	0.000122106	1478	-0.0322247	260	-2.01415	280	1.69964e-05	300	5.37301e-06	561	0.00202301	561	0.00202301
GZF1	379	0.113429	96	0.0100381	913	1	71	0.000685543	54	0.00641507	436	-0.0271252	388	-2.41447	1853	-0.000253063	1825	-0.000208742	1807	-0.0146669	1807	-0.0146669
METTL14	380	0.1153	248	0.0986673	431	0.172033	524	1.30302e-05	201	0.000754344	772	-0.0296128	724	-3.06491	1765	-0.000102477	1841	-0.000249181	451	0.00350717	451	0.00350717
HNRNPLL	381	0.116089	977	1	112	0.000775286	1779	-0.000646553	1810	-0.00132349	606	-0.0286656	794	-3.17222	118	0.000142295	115	9.26028e-05	420	0.00395499	420	0.00395499
SMARCC1	382	0.117978	80	0.00673291	913	1	1784	-0.000676396	33	0.0116618	291	-0.0250291	28	4.65795	1533	-1.78989e-05	1682	-6.47951e-05	1632	-0.00795087	1632	-0.00795087
TCF7L2	383	0.119026	977	1	196	0.00492147	1667	-0.000204025	1645	-0.000235629	1182	-0.0313182	586	-2.81945	197	4.27818e-05	191	2.70418e-05	335	0.00573251	335	0.00573251
ZNF41	384	0.120269	727	0.68253	491	0.300972	1109	-2.16643e-06	669	2.50989e-05	1252	-0.0315321	1236	-3.91382	1154	-2.88709e-07	363	1.66417e-06	439	0.00373121	439	0.00373121
AFF4	385	0.120309	977	1	313	0.0419275	1520	-5.68474e-05	578	4.8123e-05	1008	-0.0306183	198	-1.79634	233	2.7537e-05	200	2.34422e-05	306	0.00645831	306	0.00645831
LMO1	386	0.12141	463	0.356299	459	0.243927	147	0.000258117	289	0.00033153	598	-0.0285857	1548	-4.5588	272	1.90366e-05	1490	-1.52367e-05	498	0.00279261	498	0.00279261
MTHFD1	387	0.122204	89	0.00856171	565	0.426975	235	9.52073e-05	312	0.000291963	339	-0.0258652	419	-2.48341	387	3.05397e-06	1213	-1.08288e-06	1254	-0.00187908	1254	-0.00187908
CTNNB1	388	0.122948	676	0.619626	421	0.161427	356	3.79293e-05	256	0.000464553	1413	-0.0320169	1511	-4.46249	386	3.06193e-06	317	4.24159e-06	443	0.00365824	443	0.00365824
H2AK119Ub	389	0.123694	181	0.0526856	913	1	213	0.000115318	302	0.000309248	255	-0.0242749	1680	-4.9591	1839	-0.000211909	1819	-0.000198418	1870	-0.0205854	1870	-0.0205854
T (TFs)	390	0.124356	977	1	252	0.015568	1635	-0.00015218	1699	-0.000402945	444	-0.0272186	1860	-6.37594	139	0.000107384	131	6.60216e-05	431	0.00385349	431	0.00385349
LEO1	391	0.124894	83	0.00714221	614	0.525189	1819	-0.00110246	1850	-0.00230699	34	-0.00904232	20	7.53939	458	6.27134e-07	453	2.08208e-07	744	0.000216773	744	0.000216773
FUS	392	0.126127	110	0.0146233	453	0.236274	91	0.000450618	194	0.000801373	190	-0.0229409	621	-2.89641	1832	-0.00019035	1820	-0.000199054	1943	-0.0523858	1943	-0.0523858
HNRNPH1	392	0.126127	977	1	210	0.00699713	461	2.0371e-05	1750	-0.000651545	1319	-0.0317377	872	-3.3245	175	6.44256e-05	153	4.77359e-05	194	0.00960258	194	0.00960258
H3ac	394	0.127003	193	0.0601439	913	1	1937	-0.0104749	452	0.000110941	101	-0.0184723	86	-0.886597	1890	-0.00047821	1914	-0.000992582	1625	-0.00785676	1625	-0.00785676
NUP153	395	0.127534	977	1	319	0.0457115	543	1.20681e-05	1585	-0.000138073	1446	-0.0321569	603	-2.85784	379	3.41489e-06	329	3.12034e-06	399	0.00431935	399	0.00431935
SRPK2	396	0.128788	170	0.0460776	587	0.472474	52	0.00101233	88	0.00345554	535	-0.0281979	1374	-4.16199	1794	-0.000139566	1769	-0.000127088	430	0.00386353	430	0.00386353
TFEB	397	0.130452	796	0.774248	404	0.145694	1896	-0.00329765	1918	-0.00943729	102	-0.018547	1069	-3.61562	1816	-0.000161702	58	0.000282699	1359	-0.00292355	1359	-0.00292355
CHD2	398	0.13067	977	1	176	0.00328787	1455	-3.33977e-05	1648	-0.000244768	819	-0.029858	788	-3.16453	312	1.0258e-05	266	9.37109e-06	110	0.013746	110	0.013746
EBF1	399	0.131578	913	0.917064	284	0.0270124	1820	-0.00111094	1866	-0.00291913	376	-0.0265376	449	-2.56192	1859	-0.000269325	1885	-0.000519821	215	0.00871369	215	0.00871369
H4K5K8ac	400	0.131986	84	0.00756329	913	1	35	0.00178391	27	0.0144962	287	-0.0249539	569	-2.79225	1824	-0.000175686	1688	-7.02774e-05	1628	-0.00789807	1628	-0.00789807
ZNF189	400	0.131986	84	0.00756329	810	0.837091	34	0.00181461	35	0.0114108	404	-0.0267764	1770	-5.41187	1863	-0.000287807	1855	-0.000312369	1852	-0.0182428	1852	-0.0182428
MEF2A	402	0.134261	316	0.184313	419	0.15916	105	0.000388428	182	0.000919523	833	-0.0299207	1754	-5.3063	228	2.89807e-05	1458	-1.23564e-05	314	0.00628648	314	0.00628648
NFYC	403	0.137821	977	1	273	0.0241626	1786	-0.0006902	1854	-0.00250879	199	-0.0231269	901	-3.36523	66	0.000310176	96	0.000132618	629	0.00133704	629	0.00133704
MLLT1	404	0.138707	977	1	277	0.0257307	498	1.55605e-05	1557	-0.000104386	838	-0.0299527	1005	-3.51519	342	8.05209e-06	318	3.95371e-06	161	0.01123	161	0.01123
DDX17	405	0.139169	480	0.379239	497	0.308772	593	8.85624e-06	612	3.67019e-05	564	-0.028352	1722	-5.13755	412	1.77055e-06	403	7.72278e-07	533	0.00235466	533	0.00235466
EBNA1	406	0.140923	761	0.727198	339	0.0599278	489	1.63972e-05	425	0.000129787	1272	-0.0315811	1110	-3.67937	381	3.34045e-06	287	6.9621e-06	524	0.00245853	524	0.00245853
HOXA9	407	0.142216	977	1	125	0.000987203	1675	-0.000211518	1673	-0.000314666	685	-0.0291796	1484	-4.38886	115	0.000149003	106	0.000104912	417	0.0040135	417	0.0040135
MBNL3	408	0.143549	977	1	179	0.00366093	1439	-2.93844e-05	1400	-1.98555e-05	721	-0.0293466	1183	-3.82185	319	9.3661e-06	275	8.16612e-06	61	0.0178804	61	0.0178804
GLIS1	409	0.145172	977	1	162	0.00240631	1709	-0.00031165	1710	-0.000440909	880	-0.0301152	1497	-4.4308	202	4.06766e-05	180	3.04391e-05	167	0.0109187	167	0.0109187
SNAI2	410	0.145371	977	1	182	0.00394717	1528	-6.40526e-05	1742	-0.000612708	458	-0.0274478	1017	-3.52865	153	8.4086e-05	136	6.28827e-05	256	0.00763688	256	0.00763688
ZNF398	411	0.146695	357	0.232927	688	0.65212	1898	-0.00358709	1929	-0.0132707	29	-0.00853478	459	-2.58801	1927	-0.00115073	1906	-0.000791063	1798	-0.0141862	1798	-0.0141862
MBD1	412	0.152312	204	0.0684303	913	1	1939	-0.0138965	1941	-0.0525761	108	-0.0191713	49	1.02892	1906	-0.000705053	1915	-0.000998207	1176	-0.00124461	1176	-0.00124461
ERCC3	413	0.152402	391	0.271338	594	0.487468	292	6.28461e-05	541	6.08321e-05	1045	-0.0307876	398	-2.43751	1282	-1.71235e-06	1239	-1.46141e-06	407	0.00419328	407	0.00419328
LMNB1	414	0.156151	472	0.372289	458	0.242308	1932	-0.00892776	1940	-0.0252889	47	-0.0111802	511	-2.67913	1925	-0.00111391	1932	-0.00150242	1874	-0.0210827	1874	-0.0210827
ZNF615	415	0.158451	789	0.762111	562	0.414863	412	2.58456e-05	513	7.54219e-05	1287	-0.031626	1014	-3.52502	399	2.5307e-06	1141	-5.10722e-07	1219	-0.00154754	1219	-0.00154754
GATA2	416	0.16021	977	1	320	0.0459954	463	1.99904e-05	518	7.24613e-05	1023	-0.030689	1490	-4.40504	373	3.90854e-06	309	4.63238e-06	284	0.00685613	284	0.00685613
SSRP1	417	0.160647	977	1	226	0.00978905	1830	-0.00135832	1849	-0.00228441	343	-0.025956	1334	-4.09398	1220	-7.71498e-07	1760	-0.000114603	93	0.0149999	93	0.0149999
MYB	418	0.161901	977	1	141	0.00155743	1616	-0.000127789	1732	-0.000569571	628	-0.0287884	947	-3.43396	90	0.000199863	92	0.000139121	288	0.00679936	288	0.00679936
NPM1	419	0.163997	219	0.0815052	461	0.250578	1915	-0.00513145	10	0.0307954	1176	-0.0312857	1943	-11.2884	1929	-0.00115705	1917	-0.0010124	1887	-0.0222545	1887	-0.0222545
ZNF608	420	0.164716	795	0.774024	383	0.116024	1200	-5.14683e-06	657	2.89494e-05	1292	-0.0316397	1107	-3.67259	404	2.30335e-06	373	1.42801e-06	297	0.00662942	297	0.00662942
HDAC9	421	0.167284	616	0.53219	606	0.515493	520	1.32642e-05	695	2.10737e-05	1180	-0.0313038	268	-2.04584	1133	-2.43151e-07	1219	-1.11347e-06	1285	-0.00217505	1285	-0.00217505
KDM5C	422	0.168014	977	1	210	0.00699713	1403	-2.34726e-05	1658	-0.000268492	1282	-0.0316115	501	-2.65817	266	1.97919e-05	284	7.23733e-06	198	0.00938705	198	0.00938705
SNAI1	423	0.169887	518	0.42627	609	0.520292	1113	-2.27253e-06	860	5.39499e-06	826	-0.0298882	965	-3.4597	1219	-7.61387e-07	470	1.25884e-07	286	0.00683823	286	0.00683823
GTF2H2C	423	0.169887	387	0.26588	609	0.520292	416	2.52107e-05	352	0.00022913	537	-0.0282022	1182	-3.81318	443	9.46626e-07	993	-6.14825e-08	525	0.00244744	525	0.00244744
ZNF18	425	0.171547	118	0.0189401	913	1	1867	-0.00213877	80	0.00401062	148	-0.0213777	212	-1.84947	1607	-3.05906e-05	1839	-0.00024091	1542	-0.00570825	1542	-0.00570825
CDK2	426	0.173861	285	0.142968	615	0.527561	154	0.000239081	278	0.000378146	847	-0.0299799	644	-2.93369	1191	-5.40627e-07	1299	-2.73981e-06	470	0.00330093	470	0.00330093
JAZF1	427	0.175204	552	0.455529	412	0.149688	1300	-1.06792e-05	698	2.06988e-05	58	-0.0138244	1229	-3.90744	467	5.45206e-07	506	4.49488e-08	355	0.00527285	355	0.00527285
ZMYND8	428	0.17619	67	0.00441182	913	1	114	0.000356802	226	0.000558164	355	-0.026178	48	1.16524	1762	-0.000101773	1745	-0.000104393	1918	-0.0281036	1918	-0.0281036
Biotin	429	0.177175	119	0.0194649	913	1	214	0.000112887	190	0.000835453	165	-0.0220249	1802	-5.76671	1823	-0.00017466	1814	-0.000179592	1865	-0.0199819	1865	-0.0199819
ZNF671	430	0.18078	491	0.389323	640	0.572838	618	7.41977e-06	1402	-2.11042e-05	224	-0.0236996	367	-2.36244	527	1.05011e-07	460	1.75073e-07	640	0.00122052	640	0.00122052
DMRT2	431	0.18206	286	0.144323	621	0.542351	196	0.000143014	442	0.000117314	849	-0.0300003	818	-3.22873	489	3.22148e-07	1305	-2.87357e-06	384	0.00454963	384	0.00454963
DUX4	432	0.184604	561	0.464526	395	0.132727	1897	-0.00341416	1923	-0.0102963	116	-0.0196177	302	-2.16951	1922	-0.00103611	1928	-0.00136611	1936	-0.036205	1936	-0.036205
RUNX1T1	433	0.185758	526	0.432969	648	0.581744	1687	-0.000249346	643	3.09959e-05	635	-0.0288628	91	-1.04409	1831	-0.000185986	1727	-8.81428e-05	491	0.00295004	491	0.00295004
TET3	434	0.187718	451	0.34282	625	0.552402	594	8.81094e-06	473	9.33452e-05	1046	-0.03079	1054	-3.59215	1290	-1.80847e-06	1309	-2.97284e-06	480	0.00317722	480	0.00317722
ZNF133	435	0.187989	977	1	305	0.0356406	1559	-8.28908e-05	713	1.83984e-05	1178	-0.031288	504	-2.66233	307	1.1006e-05	263	9.69742e-06	273	0.00726204	273	0.00726204
XPO1	436	0.188792	977	1	198	0.00554676	1752	-0.000437767	1725	-0.000515843	1355	-0.0318372	962	-3.4533	95	0.000188409	95	0.000133356	218	0.00862733	218	0.00862733
AAV Rep68	437	0.190841	492	0.391018	655	0.590735	375	3.21542e-05	619	3.60109e-05	1590	-0.032612	326	-2.23011	529	9.87466e-08	522	1.76942e-08	646	0.00108183	646	0.00108183
GGCT	438	0.192248	121	0.0199997	913	1	64	0.000797444	92	0.00318249	518	-0.0280517	334	-2.25203	1730	-8.02762e-05	1712	-8.00737e-05	1755	-0.0122799	1755	-0.0122799
H3.3	439	0.19331	977	1	285	0.0272947	1649	-0.000169759	1720	-0.00049593	469	-0.0275717	733	-3.07922	466	5.46665e-07	1313	-3.00054e-06	123	0.0128428	123	0.0128428
FOXF1	440	0.197277	977	1	286	0.027832	1516	-5.44563e-05	1335	-1.07261e-05	1174	-0.0312834	365	-2.35616	303	1.1905e-05	244	1.29336e-05	239	0.00812717	239	0.00812717
ZNF202	441	0.201304	871	0.873215	231	0.0103806	842	2.77513e-07	489	8.56269e-05	1836	-0.0342385	701	-3.0195	305	1.14703e-05	255	1.11909e-05	121	0.0129752	121	0.0129752
XRN2	442	0.203899	977	1	310	0.0396905	1054	-9.97431e-07	1503	-6.33752e-05	945	-0.0303675	807	-3.20731	358	5.73533e-06	301	5.23848e-06	175	0.0104043	175	0.0104043
MTA3	443	0.204001	977	1	206	0.00667149	1319	-1.24276e-05	1611	-0.00017185	1160	-0.0312183	1031	-3.55031	223	3.10024e-05	193	2.65178e-05	186	0.00998309	186	0.00998309
ZNF224	444	0.204103	428	0.314373	622	0.54485	552	1.15536e-05	571	5.10818e-05	1320	-0.0317394	338	-2.26753	1121	-1.98523e-07	1165	-6.60811e-07	486	0.00302165	486	0.00302165
ZIK1	445	0.206641	148	0.0334793	913	1	93	0.000430201	121	0.00245051	1357	-0.0318385	258	-2.01163	1836	-0.000203329	1832	-0.000214702	1914	-0.0274528	1914	-0.0274528
THRB	446	0.206656	894	0.890284	199	0.00557506	1338	-1.38658e-05	921	2.63471e-06	1122	-0.0310622	713	-3.05269	249	2.34713e-05	217	1.87973e-05	100	0.0144861	100	0.0144861
ZNF598	447	0.207034	931	0.945175	414	0.152265	1588	-9.8416e-05	180	0.000942473	869	-0.0300678	763	-3.12628	310	1.08365e-05	390	9.27607e-07	1056	-0.000556588	1056	-0.000556588
H3R8me2	448	0.208915	977	1	308	0.0391282	1492	-4.56578e-05	805	8.64563e-06	595	-0.0285371	1127	-3.71685	314	9.94928e-06	261	9.85895e-06	279	0.00701163	279	0.00701163
MAZ	449	0.209129	661	0.598689	487	0.286079	1670	-0.000208583	349	0.000232706	280	-0.0248493	1094	-3.6568	293	1.42277e-05	172	3.66595e-05	1380	-0.00323108	1380	-0.00323108
LRWD1	450	0.210414	412	0.297939	502	0.312783	236	9.43756e-05	186	0.000877328	1650	-0.0328906	657	-2.9517	416	1.64346e-06	406	7.54383e-07	535	0.00233943	535	0.00233943
ZNF485	451	0.21164	977	1	292	0.0297776	1334	-1.37422e-05	490	8.48235e-05	1877	-0.0351573	919	-3.39313	335	8.42231e-06	327	3.28957e-06	162	0.0111614	162	0.0111614
H2Bub	452	0.212281	33	0.000750661	913	1	32	0.00206121	45	0.00847784	228	-0.0238445	220	-1.88312	1754	-9.68222e-05	1731	-9.1912e-05	1687	-0.00935477	1687	-0.00935477
ZIC2	452	0.212281	465	0.356999	496	0.307393	1905	-0.00422164	1914	-0.00793754	45	-0.011015	781	-3.15788	1938	-0.00150449	1908	-0.000884415	1396	-0.0034334	1396	-0.0034334
CBFA2T2	454	0.213499	977	1	207	0.00674263	1146	-3.31853e-06	561	5.35438e-05	1299	-0.0316478	1477	-4.37121	226	2.96838e-05	184	2.93411e-05	105	0.0141261	105	0.0141261
LMTK3	455	0.21586	138	0.0278179	913	1	85	0.000519018	112	0.0025965	242	-0.0241234	945	-3.43052	1454	-8.54017e-06	1687	-6.96851e-05	603	0.0016458	603	0.0016458
KLF16	456	0.216686	977	1	343	0.0615365	459	2.0696e-05	526	6.87107e-05	1062	-0.0308366	1733	-5.19198	355	6.65386e-06	348	2.31699e-06	338	0.00568744	338	0.00568744
EP300	457	0.216728	128	0.0231053	913	1	1855	-0.00181624	47	0.00840619	150	-0.0214306	227	-1.90653	1779	-0.000124609	1850	-0.000299162	1607	-0.00733817	1607	-0.00733817
POLR2B	458	0.218027	977	1	287	0.0281462	1828	-0.00125089	1869	-0.00301516	442	-0.0271829	1013	-3.52352	97	0.000187373	1701	-7.46891e-05	234	0.0082543	234	0.0082543
ARID4B	459	0.219229	86	0.00801803	913	1	137	0.000288169	158	0.00138044	531	-0.028157	111	-1.28789	1736	-8.27664e-05	1714	-8.0575e-05	1822	-0.0160068	1822	-0.0160068
PBRM1	460	0.219986	977	1	386	0.121282	522	1.31673e-05	617	3.60722e-05	1051	-0.0308068	1771	-5.43235	409	1.86425e-06	407	7.43096e-07	362	0.0051208	362	0.0051208
ZNF839	461	0.221213	103	0.0129652	913	1	874	0	1004	0	15	-0.00120023	46	1.61708	591	0	556	0	904	-5.6116e-12	904	-5.6116e-12
H4K5ac	462	0.221806	670	0.61362	389	0.126291	1829	-0.00129762	1880	-0.0036929	354	-0.0261487	289	-2.13372	164	7.13648e-05	1606	-3.49866e-05	1719	-0.0105773	1719	-0.0105773
H3.3 K27M mutant	463	0.223329	929	0.94472	212	0.00701602	564	1.08701e-05	1358	-1.32542e-05	675	-0.0291493	1066	-3.60976	327	8.89983e-06	227	1.67582e-05	269	0.00736405	269	0.00736405
MLXIP	463	0.223329	411	0.296713	420	0.161124	155	0.000229599	367	0.000210906	559	-0.0283144	1470	-4.34858	196	4.3089e-05	231	1.63846e-05	1066	-0.000598708	1066	-0.000598708
ZNF175	465	0.224555	974	0.995175	460	0.247364	370	3.29845e-05	472	9.40329e-05	1863	-0.0347169	1596	-4.70853	500	2.6148e-07	345	2.36604e-06	476	0.00323821	476	0.00323821
NKX2-5	466	0.228987	347	0.220897	438	0.189279	357	3.71047e-05	1587	-0.000142808	502	-0.0279209	373	-2.37894	361	5.04841e-06	388	9.86203e-07	1047	-0.000485747	1047	-0.000485747
MXD1	467	0.22996	977	1	237	0.0114436	1340	-1.40006e-05	1646	-0.00023911	1273	-0.0315916	1360	-4.14016	231	2.85265e-05	224	1.69301e-05	200	0.00930872	200	0.00930872
CREB3L1	468	0.231227	977	1	423	0.165351	503	1.50985e-05	1679	-0.000335869	461	-0.0275132	1792	-5.62952	446	8.84189e-07	393	9.06483e-07	260	0.00757603	260	0.00757603
H3K9K14K18K23K27ac	469	0.231509	977	1	165	0.00251757	1534	-6.64235e-05	1289	-7.07531e-06	668	-0.0290562	1279	-3.99827	257	2.16266e-05	181	3.04062e-05	191	0.00973443	191	0.00973443
YBX3	470	0.231966	888	0.887626	617	0.530002	600	8.40185e-06	1218	-3.15986e-06	1020	-0.0306798	1337	-4.09798	1120	-1.97374e-07	1251	-1.71346e-06	741	0.000223195	741	0.000223195
HHEX	471	0.235514	977	1	209	0.00693096	1691	-0.000256317	1741	-0.000612006	1499	-0.0322879	670	-2.979	287	1.59025e-05	232	1.63644e-05	197	0.00950697	197	0.00950697
SOX6	472	0.237716	977	1	203	0.00656506	1303	-1.08468e-05	737	1.4928e-05	1579	-0.0325822	928	-3.40369	322	9.22027e-06	289	6.54265e-06	112	0.0135829	112	0.0135829
TEAD2	473	0.239923	66	0.00431554	913	1	27	0.00234555	83	0.00370927	492	-0.0278124	128	-1.38719	1509	-1.4092e-05	1533	-2.13339e-05	1262	-0.001905	1262	-0.001905
HDGF	473	0.239923	244	0.0947675	829	0.866722	1880	-0.00253008	116	0.00251612	128	-0.0204292	1288	-4.00981	1907	-0.000713883	1902	-0.000748025	1479	-0.00458275	1479	-0.00458275
TRERF1	475	0.240788	380	0.260426	678	0.641405	553	1.15068e-05	502	8.01182e-05	984	-0.0305318	608	-2.87127	538	8.70866e-08	1047	-1.67088e-07	1342	-0.00273198	1342	-0.00273198
MYBL2	476	0.244911	68	0.00441569	913	1	129	0.000298359	73	0.00448019	1907	-0.0374939	60	0.0103719	1740	-8.61162e-05	1616	-3.8108e-05	1192	-0.00139855	1192	-0.00139855
OTX1	477	0.247361	254	0.103417	913	1	57	0.000904289	134	0.00200648	495	-0.0278266	1074	-3.62414	1575	-2.32514e-05	1698	-7.43715e-05	510	0.00264666	510	0.00264666
TRIM28	478	0.248952	488	0.387532	541	0.37778	1926	-0.00671377	1928	-0.0127848	49	-0.0115813	387	-2.4124	1914	-0.000814873	1924	-0.00124909	1764	-0.0125971	1764	-0.0125971
LCORL	479	0.249954	524	0.431173	707	0.688583	642	6.25861e-06	611	3.71099e-05	1733	-0.0333425	523	-2.70137	546	5.52564e-08	546	1.59796e-09	677	0.000782213	677	0.000782213
NELFCD	480	0.25212	977	1	387	0.122353	1519	-5.6721e-05	205	0.000701328	512	-0.0280074	1824	-5.99369	375	3.73492e-06	339	2.51899e-06	410	0.0041432	410	0.0041432
CUL4A	481	0.253729	977	1	369	0.0918116	1698	-0.000279046	1813	-0.00137539	1042	-0.0307709	1058	-3.59859	1811	-0.00015744	1790	-0.000147037	1946	-0.139091	1946	-0.139091
ZNF444	482	0.254202	322	0.196266	682	0.644278	1457	-3.40707e-05	481	8.80813e-05	400	-0.0267538	236	-1.93881	450	8.10058e-07	439	3.67727e-07	679	0.000752949	679	0.000752949
ZBTB37	483	0.255061	39	0.00112023	913	1	49	0.00113927	53	0.0065792	252	-0.0242565	131	-1.39485	1561	-2.18506e-05	1528	-2.06448e-05	1631	-0.0079452	1631	-0.0079452
POLR3C (TFs)	484	0.257433	851	0.843579	568	0.434162	1348	-1.50079e-05	1259	-5.5217e-06	1113	-0.0310374	112	-1.28857	468	5.36935e-07	472	1.24991e-07	589	0.00175304	589	0.00175304
ASXL1	485	0.258506	809	0.785127	396	0.133211	1809	-0.000938524	1897	-0.00530738	409	-0.0268293	290	-2.13769	109	0.000155653	1624	-4.13106e-05	681	0.000743232	681	0.000743232
MCM2	486	0.260144	263	0.109371	573	0.445695	1399	-2.30084e-05	1300	-7.95644e-06	138	-0.0210506	34	3.26691	1189	-5.27463e-07	368	1.53734e-06	316	0.00623405	316	0.00623405
HNF1A	487	0.261837	573	0.482472	480	0.276022	1148	-3.36443e-06	413	0.000138992	302	-0.025206	786	-3.16332	516	1.59011e-07	481	1.02122e-07	511	0.00264362	511	0.00264362
BRD3	488	0.263047	151	0.0361704	913	1	158	0.000225206	265	0.000416513	231	-0.0238859	1775	-5.45435	1825	-0.000179858	1817	-0.000188567	1835	-0.0169954	1835	-0.0169954
ZNF70	488	0.263047	152	0.0365658	913	1	1842	-0.00164285	203	0.000713925	266	-0.0245715	70	-0.407224	1903	-0.000663631	1899	-0.000715689	1730	-0.011075	1730	-0.011075
TTF2	490	0.265157	576	0.484155	702	0.6796	1149	-3.3725e-06	802	8.73745e-06	460	-0.0275011	611	-2.87704	1236	-8.92111e-07	1217	-1.10417e-06	1284	-0.0021547	1284	-0.0021547
JRK	491	0.267281	598	0.510252	821	0.850481	501	1.52859e-05	596	4.25462e-05	684	-0.0291725	1485	-4.39162	591	0	556	0	623	0.00140427	623	0.00140427
THAP12	492	0.271087	703	0.65462	708	0.688678	644	6.22862e-06	960	9.70068e-07	1239	-0.0314879	825	-3.2462	1266	-1.47036e-06	1108	-3.61455e-07	1281	-0.00212572	1281	-0.00212572
H2BK5ac	493	0.275106	612	0.524101	713	0.694786	492	1.61891e-05	774	1.14462e-05	1172	-0.0312791	1065	-3.60919	1286	-1.77184e-06	1262	-1.92729e-06	1360	-0.00293199	1360	-0.00293199
SFMBT1	494	0.277135	633	0.560802	714	0.697857	546	1.18375e-05	515	7.50301e-05	1192	-0.0313466	1030	-3.54845	1272	-1.57259e-06	1291	-2.60129e-06	1361	-0.00295239	1361	-0.00295239
ICE1	495	0.279178	939	0.9559	645	0.580846	575	9.95727e-06	422	0.000133841	1362	-0.0318443	907	-3.37231	424	1.38988e-06	1175	-7.17912e-07	606	0.00163232	606	0.00163232
IKZF2	496	0.281464	977	1	468	0.254756	1835	-0.00140957	1873	-0.00318024	136	-0.0209347	1522	-4.51474	1945	-0.00299911	1941	-0.00271961	1791	-0.0139753	1791	-0.0139753
LRRFIP1	497	0.283186	543	0.445662	746	0.739181	650	6.03943e-06	583	4.72866e-05	647	-0.028921	1704	-5.06629	564	1.65571e-08	531	9.75843e-09	692	0.00063617	692	0.00063617
H1.4	497	0.283186	977	1	240	0.0120574	1509	-5.25497e-05	1549	-0.000102434	938	-0.0303454	604	-2.86184	311	1.07124e-05	249	1.21096e-05	184	0.0100413	184	0.0100413
H3K18ac	499	0.284194	977	1	366	0.0859498	1812	-0.000950765	1852	-0.00239234	246	-0.0241843	1502	-4.44459	100	0.000175141	113	9.71026e-05	627	0.00137419	627	0.00137419
HES5	500	0.287487	923	0.933639	448	0.222353	1294	-1.01228e-05	1354	-1.30571e-05	1201	-0.0313819	457	-2.58097	485	3.52357e-07	465	1.4036e-07	449	0.00352579	449	0.00352579
ZNF766	501	0.289598	520	0.427593	726	0.716521	640	6.40268e-06	460	0.000102305	1194	-0.031366	173	-1.66416	398	2.61354e-06	389	9.345e-07	1367	-0.00303775	1367	-0.00303775
ZNF264	501	0.289598	126	0.0220842	726	0.716521	203	0.000125759	252	0.000469508	264	-0.0245235	531	-2.71092	1334	-2.89528e-06	1354	-4.93665e-06	1296	-0.00227606	1296	-0.00227606
HBcAg	503	0.291724	652	0.583727	728	0.719671	1031	-6.32566e-07	1204	-2.73911e-06	1123	-0.031065	247	-1.98183	1074	-1.1536e-07	1125	-4.36162e-07	633	0.00128456	633	0.00128456
NFAT5	504	0.293863	875	0.874422	731	0.722833	1263	-7.98487e-06	1197	-2.56773e-06	1332	-0.0317713	822	-3.23345	1269	-1.50589e-06	1249	-1.6834e-06	1369	-0.00307586	1369	-0.00307586
ZNF30	504	0.293863	307	0.174956	521	0.339517	120	0.000336646	177	0.0010247	1233	-0.031452	1369	-4.14528	405	2.25937e-06	1207	-1.00178e-06	604	0.00164513	604	0.00164513
CASZ1	506	0.294983	191	0.0594479	592	0.480663	315	5.16447e-05	207	0.000684971	1419	-0.0320459	278	-2.09431	1279	-1.67656e-06	446	2.73868e-07	668	0.000830522	668	0.000830522
SIX5	507	0.296017	947	0.967179	733	0.726007	1206	-5.5378e-06	534	6.55614e-05	1366	-0.0318631	1326	-4.07862	1070	-1.09948e-07	1104	-3.44088e-07	608	0.00160767	608	0.00160767
VRK1	508	0.298184	960	0.981418	577	0.456387	683	4.3679e-06	1371	-1.49343e-05	1207	-0.0313964	977	-3.47376	1226	-7.99503e-07	1089	-2.65951e-07	483	0.00312222	483	0.00312222
NR3C1	509	0.298577	977	1	294	0.0319421	1618	-0.00012803	1651	-0.000253822	888	-0.0301538	591	-2.82719	262	2.02939e-05	344	2.37505e-06	224	0.00848016	224	0.00848016
ZNF445	510	0.302563	331	0.203363	739	0.735598	494	1.5881e-05	447	0.000113021	925	-0.0302883	142	-1.46594	1262	-1.35588e-06	1198	-9.18972e-07	1318	-0.00246061	1318	-0.00246061
ZNF549	510	0.302563	878	0.877051	739	0.735598	1333	-1.3733e-05	590	4.40089e-05	1029	-0.0307343	672	-2.98508	1373	-4.14345e-06	1290	-2.59541e-06	1137	-0.000979895	1137	-0.000979895
ATF4	512	0.304774	581	0.490749	743	0.738819	674	5.02371e-06	385	0.000174472	1156	-0.0312073	473	-2.60915	1316	-2.39374e-06	1224	-1.16773e-06	1374	-0.00313783	1374	-0.00313783
RREB1	513	0.306071	75	0.00597722	913	1	257	7.68467e-05	383	0.000180288	352	-0.0261229	235	-1.92784	1531	-1.74915e-05	1467	-1.2902e-05	1793	-0.0140394	1793	-0.0140394
ZC3H4	514	0.306221	977	1	165	0.00251757	1571	-8.86486e-05	1872	-0.0031622	1167	-0.0312709	828	-3.25635	245	2.46187e-05	179	3.08498e-05	427	0.00388613	427	0.00388613
ZNF664	515	0.306999	970	0.992922	535	0.365809	687	4.29889e-06	764	1.23954e-05	1001	-0.0305932	1375	-4.16634	560	2.46696e-08	503	4.93567e-08	327	0.00603461	327	0.00603461
ZNF558	516	0.311494	976	0.998711	520	0.337832	1027	-5.99879e-07	1377	-1.54938e-05	843	-0.0299656	746	-3.09676	393	2.74078e-06	385	1.02567e-06	671	0.000823033	671	0.000823033
ZNF555	517	0.312126	977	1	357	0.0738368	451	2.13587e-05	1473	-4.4569e-05	1347	-0.0318127	582	-2.81077	395	2.7342e-06	338	2.58004e-06	235	0.00822014	235	0.00822014
DDX21	518	0.312588	977	1	355	0.0732703	385	2.96254e-05	709	1.93515e-05	1852	-0.0344653	1188	-3.82689	356	6.62495e-06	294	5.90392e-06	206	0.00892403	206	0.00892403
RBPJ	518	0.312588	157	0.039231	643	0.575999	81	0.000545131	1848	-0.00227306	74	-0.016141	1945	-13.5205	1866	-0.000295134	1806	-0.000171241	385	0.00452718	385	0.00452718
ZNF7	520	0.315881	977	1	374	0.0983929	1731	-0.000372956	1714	-0.000453923	373	-0.026499	886	-3.34326	1741	-8.64326e-05	1723	-8.65849e-05	310	0.00636976	310	0.00636976
ZNF639	521	0.319199	258	0.106762	913	1	1906	-0.00422175	387	0.000173653	87	-0.0175655	339	-2.27006	1916	-0.000838509	1927	-0.00128404	1043	-0.000465083	1043	-0.000465083
HEY2	522	0.320662	977	1	499	0.310581	1381	-1.91226e-05	521	7.08612e-05	692	-0.0291998	1289	-4.01148	362	4.97071e-06	321	3.8858e-06	551	0.00219152	551	0.00219152
KMT2C	523	0.322991	171	0.0468961	757	0.765008	641	6.26421e-06	562	5.30319e-05	320	-0.025535	217	-1.86776	1166	-3.73873e-07	1081	-2.36959e-07	1382	-0.0033049	1382	-0.0033049
SLBP	523	0.322991	698	0.644117	757	0.765008	1234	-6.70598e-06	884	4.15149e-06	677	-0.0291517	881	-3.33809	1201	-6.12094e-07	1153	-5.45072e-07	1329	-0.00256378	1329	-0.00256378
HOXA3	525	0.323118	977	1	511	0.320908	1638	-0.000154121	266	0.000413827	507	-0.0279596	1253	-3.94333	1527	-1.68156e-05	1373	-5.80514e-06	259	0.00757608	259	0.00757608
BCL6	526	0.325998	819	0.791593	478	0.270473	1627	-0.000134537	411	0.000139618	236	-0.0240259	1825	-6.00303	426	1.37396e-06	324	3.40571e-06	540	0.00225737	540	0.00225737
E2F3	527	0.326769	77	0.00610477	913	1	144	0.000267925	143	0.00181267	1930	-0.0403271	59	0.0173353	1539	-1.89775e-05	1535	-2.13485e-05	1487	-0.00485927	1487	-0.00485927
ZNF677	528	0.329569	120	0.0197557	913	1	40	0.00142235	57	0.00568229	333	-0.0257441	1091	-3.6544	1774	-0.000114871	1721	-8.5672e-05	1671	-0.00892152	1671	-0.00892152
ATM	529	0.331254	281	0.135036	781	0.802277	243	8.98615e-05	363	0.000216719	835	-0.0299266	722	-3.06138	1393	-5.00545e-06	1382	-6.11205e-06	517	0.00259022	517	0.00259022
HOXA5	530	0.331284	513	0.418662	913	1	1108	-2.02876e-06	547	5.72276e-05	608	-0.0286743	963	-3.45534	1072	-1.14226e-07	524	1.50192e-08	747	0.000182807	747	0.000182807
TOP2B	531	0.332698	78	0.0062303	913	1	30	0.00225004	103	0.00274953	145	-0.0212942	1201	-3.85177	1586	-2.54776e-05	1527	-2.04247e-05	1669	-0.00887825	1669	-0.00887825
FOXA2	532	0.332706	977	1	377	0.103091	353	3.85962e-05	649	2.98849e-05	1653	-0.0328987	1307	-4.0305	391	2.81396e-06	277	7.78174e-06	342	0.00561243	342	0.00561243
H3K18cr	533	0.33299	190	0.0590004	913	1	54	0.000969727	100	0.00286759	601	-0.0285923	1925	-8.40772	1904	-0.000677822	1893	-0.000639278	1858	-0.0189909	1858	-0.0189909
ZNF462	534	0.337291	638	0.57027	769	0.785153	507	1.39681e-05	750	1.37795e-05	1197	-0.0313784	496	-2.64665	1360	-3.62952e-06	1327	-3.60817e-06	1388	-0.00336185	1388	-0.00336185
RFX1	535	0.34068	809	0.785127	444	0.202071	259	7.62506e-05	409	0.000140885	1398	-0.0319465	1602	-4.72863	343	7.96063e-06	1107	-3.6108e-07	357	0.00520794	357	0.00520794
ZBTB4	535	0.34068	700	0.646581	443	0.197595	1783	-0.000668199	84	0.00368786	545	-0.0282283	862	-3.30876	1800	-0.000146519	1840	-0.000242778	469	0.00330962	469	0.00330962
H3S57ph	537	0.34964	500	0.399356	781	0.802277	273	7.03054e-05	294	0.000324082	758	-0.0295701	1095	-3.65958	1332	-2.83751e-06	1393	-6.79003e-06	1387	-0.00334501	1387	-0.00334501
ID2	538	0.352159	977	1	635	0.567769	462	2.03323e-05	588	4.42126e-05	1394	-0.0319349	930	-3.40553	1150	-2.83248e-07	1137	-4.96228e-07	1178	-0.00126869	1178	-0.00126869
MESP1	538	0.352159	977	1	590	0.478413	1394	-2.18664e-05	1302	-8.09976e-06	679	-0.0291561	1193	-3.83525	509	2.10155e-07	1193	-8.71113e-07	339	0.00566618	339	0.00566618
H3K36me2	540	0.352765	301	0.165096	913	1	1768	-0.000534412	139	0.00186531	452	-0.0273162	307	-2.18568	1748	-8.93907e-05	1614	-3.77724e-05	549	0.00220312	549	0.00220312
BANP	541	0.353588	977	1	390	0.128207	1733	-0.000376325	1748	-0.000647401	644	-0.0289033	1713	-5.10587	1854	-0.000255239	1823	-0.000205735	1945	-0.0621071	1945	-0.0621071
LEF1	542	0.357244	225	0.0864593	789	0.8127	87	0.00049713	122	0.00244355	418	-0.0269411	798	-3.1801	1379	-4.39734e-06	1396	-7.07592e-06	1326	-0.00254422	1326	-0.00254422
MCM3	543	0.357273	977	1	197	0.00507199	1630	-0.000139836	1598	-0.000154361	784	-0.0297164	1472	-4.35225	341	8.10833e-06	398	8.46287e-07	101	0.0143897	101	0.0143897
TBL1Y	544	0.362029	977	1	326	0.050242	1483	-4.04649e-05	532	6.639e-05	1181	-0.0313151	815	-3.22396	351	6.96183e-06	288	6.91442e-06	173	0.0104856	173	0.0104856
CIITA	545	0.362395	977	1	668	0.607753	1398	-2.29861e-05	431	0.00012399	1281	-0.0316105	552	-2.74982	1330	-2.79212e-06	1199	-9.22815e-07	690	0.000669179	690	0.000669179
MAPK1	546	0.364996	514	0.419002	799	0.823235	237	9.2743e-05	285	0.000342029	653	-0.0289578	1386	-4.18237	1399	-5.338e-06	1363	-5.48611e-06	1373	-0.00313632	1373	-0.00313632
ZNF597	547	0.370247	402	0.286686	769	0.785153	291	6.30911e-05	1401	-1.99978e-05	552	-0.0282667	412	-2.46528	1106	-1.63092e-07	1010	-9.21352e-08	1328	-0.00255948	1328	-0.00255948
H4K12me1	547	0.370247	911	0.910183	539	0.374701	1401	-2.30746e-05	568	5.15165e-05	856	-0.0300163	389	-2.41511	507	2.24701e-07	1092	-2.79619e-07	438	0.00373351	438	0.00373351
ZFY	547	0.370247	977	1	682	0.644278	1196	-4.83119e-06	1323	-9.62823e-06	1401	-0.0319615	1211	-3.86537	1228	-8.34446e-07	1264	-1.93391e-06	1343	-0.00274419	1343	-0.00274419
AEBP2	550	0.375567	811	0.786075	445	0.208186	1189	-4.53522e-06	1287	-7.0566e-06	1297	-0.0316464	723	-3.06397	476	4.15621e-07	451	2.13398e-07	317	0.00623005	317	0.00623005
ZNF584	550	0.375567	977	1	456	0.241016	563	1.08828e-05	1366	-1.37289e-05	488	-0.0277884	1403	-4.22189	486	3.31271e-07	1140	-5.08798e-07	432	0.00382958	432	0.00382958
RFX5	550	0.375567	912	0.911787	600	0.498987	806	8.15303e-07	1403	-2.12561e-05	1374	-0.0318784	122	-1.34547	1057	-9.11218e-08	1223	-1.15975e-06	1235	-0.00168243	1235	-0.00168243
CDK8	553	0.376711	662	0.601044	467	0.254335	569	1.04655e-05	728	1.57441e-05	1636	-0.0328335	104	-1.23097	504	2.35348e-07	441	3.44639e-07	441	0.00367918	441	0.00367918
NRL	554	0.378252	384	0.263617	811	0.841047	369	3.33837e-05	748	1.38615e-05	987	-0.0305397	291	-2.13825	1311	-2.20421e-06	1404	-7.6383e-06	435	0.00378566	435	0.00378566
ZNF865	555	0.379605	977	1	392	0.131154	1268	-8.14075e-06	396	0.000162053	729	-0.0293755	1919	-8.07361	418	1.59547e-06	331	2.93512e-06	228	0.00839763	228	0.00839763
SOX21	556	0.382079	40	0.0014545	913	1	140	0.000274945	159	0.00136126	269	-0.024657	137	-1.44597	1336	-2.92648e-06	1491	-1.53519e-05	1533	-0.00562328	1533	-0.00562328
NCOA2	557	0.382516	609	0.522314	658	0.59375	730	2.89968e-06	722	1.69289e-05	1171	-0.0312783	476	-2.61266	487	3.23395e-07	447	2.69885e-07	647	0.0010722	647	0.0010722
CSTF2	558	0.383675	880	0.879686	819	0.848261	821	6.23038e-07	1334	-1.07205e-05	1261	-0.0315619	442	-2.54246	553	3.77069e-08	1080	-2.30618e-07	572	0.00196069	572	0.00196069
CUL3	558	0.383675	892	0.888967	752	0.751818	1406	-2.3697e-05	687	2.21813e-05	848	-0.0299984	834	-3.26433	1265	-1.46639e-06	1063	-1.86832e-07	571	0.00197278	571	0.00197278
INSR	560	0.386413	794	0.769242	822	0.851887	680	4.6404e-06	725	1.63404e-05	1290	-0.0316378	1281	-4.0001	1222	-7.78611e-07	1183	-7.775e-07	1407	-0.00355141	1407	-0.00355141
CAMTA2	561	0.386822	977	1	238	0.0116986	1365	-1.72125e-05	1507	-6.54521e-05	1494	-0.0322584	740	-3.08779	406	2.17419e-06	356	1.83647e-06	115	0.0135466	115	0.0135466
ZNF416	562	0.388298	329	0.202485	913	1	757	1.92639e-06	924	2.49841e-06	614	-0.0287121	913	-3.38572	591	0	556	0	800	7.70012e-06	800	7.70012e-06
RBMX	563	0.389168	432	0.319995	824	0.855526	1036	-7.41525e-07	715	1.82317e-05	747	-0.0295016	1034	-3.55434	1155	-3.02519e-07	1062	-1.86152e-07	746	0.00019579	746	0.00019579
H3K18ub	564	0.391941	977	1	676	0.638543	587	9.31433e-06	1245	-4.06296e-06	941	-0.0303512	1409	-4.23294	1208	-6.91504e-07	1126	-4.36493e-07	553	0.00212231	553	0.00212231
DEC1	565	0.394731	977	1	691	0.655878	1180	-4.3185e-06	415	0.000137943	1410	-0.0319938	1060	-3.60019	536	8.9149e-08	1070	-2.05108e-07	504	0.00274728	504	0.00274728
GLI1	566	0.399884	977	1	436	0.185649	861	9.08768e-08	1615	-0.000184287	1147	-0.031162	982	-3.47773	209	3.61355e-05	221	1.7326e-05	1114	-0.000881325	1114	-0.000881325
FAM208A	567	0.400366	977	1	793	0.816199	413	2.56691e-05	746	1.40758e-05	1412	-0.0320169	1000	-3.50516	1114	-1.87705e-07	1145	-5.24578e-07	764	9.85369e-05	764	9.85369e-05
TBP	568	0.401811	861	0.85731	583	0.464563	1807	-0.000922857	1877	-0.00332107	114	-0.0195756	1207	-3.86396	1672	-4.73801e-05	156	4.57395e-05	1596	-0.00699757	1596	-0.00699757
H3K29ac	569	0.403171	977	1	407	0.146334	1495	-4.64155e-05	1174	-1.90926e-06	1303	-0.0316575	597	-2.83906	1537	-1.83313e-05	269	8.88089e-06	1944	-0.0604506	1944	-0.0604506
BRPF1	570	0.405132	315	0.182253	913	1	812	7.43566e-07	900	3.69219e-06	739	-0.0294271	498	-2.65225	591	0	556	0	803	2.92099e-06	803	2.92099e-06
ZNF354B	571	0.406073	939	0.9559	756	0.764454	1362	-1.68508e-05	723	1.66647e-05	1213	-0.0314065	515	-2.68944	432	1.24223e-06	1414	-8.26355e-06	321	0.00614306	321	0.00614306
MAP2K1	572	0.406413	977	1	371	0.0951105	1589	-0.000100715	154	0.00142749	1937	-0.0432848	738	-3.08409	321	9.27117e-06	333	2.88665e-06	563	0.00200783	563	0.00200783
ZNF524	573	0.408954	969	0.990036	838	0.881366	1214	-5.7776e-06	1374	-1.51807e-05	510	-0.0280018	973	-3.4686	1242	-9.6358e-07	1186	-7.90888e-07	1357	-0.00291363	1357	-0.00291363
TCF7L1	574	0.410988	977	1	477	0.270305	352	3.92244e-05	491	8.42526e-05	1909	-0.0377913	1930	-9.10073	390	2.83619e-06	396	8.62645e-07	567	0.00198278	567	0.00198278
IKZF5	575	0.415534	977	1	289	0.0285316	1478	-3.92236e-05	423	0.000133212	1450	-0.0321653	975	-3.47322	276	1.82576e-05	230	1.65724e-05	203	0.00916337	203	0.00916337
HOXC9	575	0.415534	143	0.0302123	913	1	82	0.000534487	238	0.000519212	249	-0.0242324	1914	-7.95169	1642	-3.6681e-05	1541	-2.24334e-05	1637	-0.00807533	1637	-0.00807533
ZC3H10	577	0.416638	493	0.392112	913	1	474	1.7761e-05	572	5.05735e-05	1090	-0.0309348	866	-3.31754	506	2.25052e-07	1135	-4.8281e-07	661	0.00089738	661	0.00089738
HNRNPA2B1	578	0.417708	977	1	667	0.605017	1418	-2.50871e-05	215	0.00064162	920	-0.0302682	772	-3.14651	1329	-2.75334e-06	469	1.28008e-07	748	0.000171696	748	0.000171696
THRA	579	0.42663	386	0.264526	850	0.904028	536	1.23476e-05	1325	-9.9437e-06	433	-0.0271015	427	-2.50284	1306	-2.14806e-06	1293	-2.61162e-06	1089	-0.000696669	1089	-0.000696669
PHF5A	580	0.432673	839	0.830629	488	0.287307	1315	-1.18003e-05	1288	-7.06252e-06	238	-0.0240457	1040	-3.56625	456	6.45225e-07	379	1.16661e-06	522	0.00249947	522	0.00249947
GATAD2B	581	0.434164	202	0.0661543	913	1	153	0.000241459	212	0.000655687	327	-0.0256767	1815	-5.8682	1849	-0.000231037	1784	-0.000139782	1710	-0.0101359	1710	-0.0101359
TBX5	582	0.435379	977	1	500	0.310773	486	1.6566e-05	574	4.96043e-05	1751	-0.0334697	1418	-4.24475	478	4.02893e-07	476	1.13679e-07	534	0.00233981	534	0.00233981
NFIX	583	0.44499	644	0.576009	861	0.927174	833	4.19089e-07	1200	-2.65079e-06	1003	-0.0305948	993	-3.49022	1095	-1.45158e-07	1073	-2.1609e-07	1425	-0.00376101	1425	-0.00376101
ZNF621	583	0.44499	977	1	776	0.79539	1427	-2.70225e-05	905	3.46446e-06	1094	-0.030947	440	-2.54201	1227	-8.10025e-07	1277	-2.30122e-06	1167	-0.00118556	1167	-0.00118556
ZNF260	583	0.44499	977	1	861	0.927174	809	7.90968e-07	717	1.78841e-05	1416	-0.0320421	889	-3.34918	1214	-7.20976e-07	1233	-1.35654e-06	1283	-0.00214753	1283	-0.00214753
ZHX2	586	0.445602	610	0.522562	470	0.258653	1702	-0.000289979	1709	-0.000429475	67	-0.0149642	437	-2.5372	1828	-0.000183471	1626	-4.18514e-05	282	0.00694012	282	0.00694012
AGO2	587	0.448118	977	1	344	0.0618198	1235	-6.72603e-06	1428	-2.97591e-05	910	-0.0302263	1078	-3.63338	413	1.76394e-06	370	1.47167e-06	180	0.0101847	180	0.0101847
DICER1	587	0.448118	977	1	637	0.570365	1230	-6.5515e-06	552	5.56565e-05	1428	-0.0320807	358	-2.33473	1299	-1.92943e-06	1235	-1.37793e-06	1316	-0.00244368	1316	-0.00244368
H3K4me1	589	0.449503	977	1	425	0.166124	1910	-0.00452256	1920	-0.00969627	163	-0.0219303	1816	-5.87823	1930	-0.00117078	1916	-0.00100408	1922	-0.029211	1922	-0.029211
POU2F3	590	0.451266	977	1	549	0.386225	607	8.12551e-06	1364	-1.36557e-05	1429	-0.032087	1261	-3.97055	449	8.29711e-07	375	1.36938e-06	569	0.00198037	569	0.00198037
RNF2	591	0.453419	977	1	342	0.061227	1474	-3.83e-05	458	0.000106771	1099	-0.0309653	1728	-5.16388	339	8.24164e-06	299	5.45787e-06	196	0.00954471	196	0.00954471
NR1I2	592	0.454434	977	1	529	0.354992	537	1.2314e-05	1430	-3.02465e-05	1164	-0.0312445	852	-3.28898	429	1.32517e-06	1216	-1.0985e-06	599	0.00165875	599	0.00165875
H3.1	592	0.454434	212	0.0758099	869	0.938931	226	0.000100978	343	0.000239106	124	-0.0200896	1329	-4.08684	1430	-6.48901e-06	1420	-9.07739e-06	1276	-0.00206469	1276	-0.00206469
TAF1	594	0.454981	701	0.649933	623	0.547357	304	5.6629e-05	1483	-4.91407e-05	1360	-0.0318426	366	-2.35749	423	1.39273e-06	1307	-2.89621e-06	402	0.00428968	402	0.00428968
BCOR	595	0.455107	615	0.529951	820	0.850473	1917	-0.00574674	1937	-0.02101	68	-0.0151118	482	-2.62297	1935	-0.00144247	1936	-0.00176125	1782	-0.0135569	1782	-0.0135569
ZNF501	596	0.45709	977	1	345	0.061894	1431	-2.79956e-05	462	0.00010113	1693	-0.0331156	1575	-4.65619	340	8.13848e-06	268	8.94282e-06	188	0.00994461	188	0.00994461
TCF12	597	0.457622	977	1	872	0.942878	1287	-9.82503e-06	635	3.28516e-05	1418	-0.0320444	551	-2.74442	1431	-6.50072e-06	1289	-2.52942e-06	739	0.00023002	739	0.00023002
TAF15	597	0.457622	977	1	509	0.319761	1369	-1.76466e-05	711	1.89593e-05	1066	-0.0308524	1431	-4.27931	498	2.70329e-07	1195	-8.94407e-07	361	0.0051671	361	0.0051671
ONECUT1	599	0.46083	977	1	738	0.73239	1432	-2.81617e-05	915	2.88842e-06	610	-0.0286868	805	-3.19919	1256	-1.17749e-06	1185	-7.86239e-07	1278	-0.00207784	1278	-0.00207784
PCBP2	599	0.46083	938	0.953096	597	0.493745	491	1.6202e-05	759	1.26734e-05	1361	-0.0318426	1120	-3.70027	572	1.05593e-08	480	1.06551e-07	612	0.00152897	612	0.00152897
ZNF883	599	0.46083	977	1	836	0.877635	1017	-5.07281e-07	1432	-3.0872e-05	1342	-0.0318046	574	-2.79915	1414	-5.86792e-06	1350	-4.58445e-06	1253	-0.00187311	1253	-0.00187311
IRF2BP2	602	0.464058	511	0.417152	880	0.950812	1107	-1.98025e-06	990	3.37659e-07	605	-0.0286389	900	-3.36384	1238	-9.25829e-07	1147	-5.31099e-07	1433	-0.00388499	1433	-0.00388499
UPF1	602	0.464058	799	0.776423	880	0.950812	541	1.21109e-05	1293	-7.43314e-06	1248	-0.0315212	136	-1.42686	1281	-1.70818e-06	1208	-1.01916e-06	700	0.000570615	700	0.000570615
H2AT120ph	604	0.465444	306	0.173505	913	1	734	2.63682e-06	889	4.03942e-06	865	-0.0300555	393	-2.42237	950	-6.4017e-11	912	-9.30762e-12	937	-3.21587e-06	937	-3.21587e-06
PPP1R10	605	0.467307	449	0.338934	884	0.9548	1051	-9.41957e-07	605	3.96548e-05	583	-0.028456	507	-2.66535	1389	-4.7675e-06	1434	-1.00482e-05	1336	-0.00262534	1336	-0.00262534
EZH1	606	0.467307	140	0.0287082	913	1	69	0.000700149	64	0.00514989	1871	-0.0349957	1875	-6.62343	1807	-0.000154091	1813	-0.000177417	961	-5.44811e-05	961	-5.44811e-05
HIRA	607	0.470576	579	0.489302	887	0.958802	311	5.22923e-05	299	0.000317437	1340	-0.0318025	1370	-4.14707	1433	-6.77616e-06	1435	-1.00622e-05	1289	-0.00221075	1289	-0.00221075
HIV1 tat	608	0.473865	977	1	645	0.580846	1205	-5.51238e-06	519	7.21621e-05	1316	-0.0317236	1436	-4.28669	1258	-1.1978e-06	1320	-3.2304e-06	1091	-0.000710777	1091	-0.000710777
MEPCE	608	0.473865	977	1	714	0.697857	1436	-2.91833e-05	405	0.000150129	1056	-0.0308217	1081	-3.63489	1361	-3.64968e-06	1243	-1.55759e-06	1347	-0.00278642	1347	-0.00278642
ELF4	610	0.474474	718	0.669846	493	0.302817	759	1.89763e-06	678	2.3274e-05	277	-0.0248148	1709	-5.09378	530	9.55741e-08	495	6.58486e-08	398	0.00435752	398	0.00435752
PHF8	611	0.477176	977	1	856	0.923283	1274	-8.53555e-06	893	3.97398e-06	1437	-0.0321325	1129	-3.71882	1102	-1.57338e-07	1015	-1.01321e-07	574	0.00194918	574	0.00194918
ZUFSP	611	0.477176	457	0.35034	890	0.966848	209	0.000118186	258	0.000446824	1132	-0.0310991	946	-3.43102	1386	-4.66761e-06	1212	-1.06749e-06	655	0.000939448	655	0.000939448
ZNF589	613	0.480507	553	0.456131	892	0.970892	510	1.36512e-05	664	2.64564e-05	600	-0.028589	1132	-3.72382	1224	-7.84179e-07	1170	-6.82265e-07	1438	-0.00397807	1438	-0.00397807
CDK12	613	0.480507	977	1	452	0.235987	1249	-7.34826e-06	536	6.4356e-05	1438	-0.0321375	494	-2.64466	1136	-2.51088e-07	360	1.77505e-06	204	0.00904417	204	0.00904417
PITX1	615	0.48157	741	0.703781	363	0.0832986	1374	-1.84093e-05	813	8.18542e-06	1711	-0.0332255	92	-1.07321	380	3.41065e-06	436	3.77805e-07	274	0.00723958	274	0.00723958
TFAP2C	616	0.48232	977	1	300	0.0338897	1690	-0.0002552	1876	-0.0032946	876	-0.0300916	1082	-3.63497	1747	-8.89322e-05	1684	-6.65266e-05	289	0.00675956	289	0.00675956
H4K20me2	617	0.483859	607	0.520532	893	0.97495	1083	-1.47421e-06	690	2.19043e-05	1170	-0.0312777	831	-3.26006	1073	-1.14922e-07	1032	-1.35867e-07	1403	-0.00350236	1403	-0.00350236
E2F6	618	0.48485	390	0.268571	913	1	638	6.51145e-06	1157	-1.19461e-06	223	-0.0236876	211	-1.84724	591	0	556	0	762	0.000104803	762	0.000104803
GTF3C5	619	0.487232	716	0.667393	362	0.0813364	1040	-7.90285e-07	912	3.00829e-06	1245	-0.0315099	760	-3.1213	417	1.60365e-06	416	6.12045e-07	202	0.00919921	202	0.00919921
KAT2A	619	0.487232	977	1	561	0.414559	405	2.73218e-05	1440	-3.31861e-05	1054	-0.0308167	1377	-4.16973	494	2.91492e-07	478	1.12455e-07	581	0.00184912	581	0.00184912
ETV1	621	0.487711	977	1	223	0.00958215	1586	-9.73371e-05	1623	-0.000193798	1229	-0.0314482	1016	-3.52718	220	3.18332e-05	290	6.29262e-06	217	0.00865526	217	0.00865526
HSF2	622	0.489614	406	0.291054	913	1	649	6.04606e-06	1177	-2.10386e-06	213	-0.0234182	233	-1.91865	1164	-3.63201e-07	1133	-4.72333e-07	657	0.000929186	657	0.000929186
DDX11	623	0.48965	977	1	408	0.146362	367	3.35528e-05	667	2.56758e-05	1715	-0.0332474	970	-3.46505	431	1.26042e-06	427	4.11049e-07	422	0.00393562	422	0.00393562
ZNF550	624	0.490626	943	0.961527	903	0.983108	1364	-1.71877e-05	563	5.26942e-05	937	-0.0303246	491	-2.64203	1441	-7.52433e-06	1422	-9.10906e-06	381	0.00463189	381	0.00463189
XRCC6	624	0.490626	977	1	255	0.0163458	1360	-1.62261e-05	1441	-3.34669e-05	1078	-0.0308933	891	-3.35196	292	1.42583e-05	258	1.03069e-05	232	0.00828941	232	0.00828941
EED	626	0.492084	628	0.552048	671	0.615289	1907	-0.00425516	1905	-0.00606299	71	-0.0157861	1230	-3.90969	1934	-0.00141857	1934	-0.00156835	1855	-0.0188072	1855	-0.0188072
H4K4me3	627	0.494103	977	1	409	0.14758	1788	-0.000702516	233	0.000540184	785	-0.0297179	991	-3.48658	1606	-3.03786e-05	1513	-1.7797e-05	334	0.00574497	334	0.00574497
ARID2	627	0.494103	287	0.145479	913	1	164	0.000213768	1749	-0.000649042	407	-0.0268057	432	-2.5231	1530	-1.7484e-05	1785	-0.000141033	1707	-0.00994081	1707	-0.00994081
TRAFD1	629	0.497478	783	0.757385	909	0.991324	584	9.51616e-06	433	0.00012268	1285	-0.0316208	924	-3.40022	1324	-2.65948e-06	1389	-6.50998e-06	678	0.000779701	678	0.000779701
OSR1	630	0.498601	49	0.00201946	913	1	102	0.00039112	202	0.000724642	196	-0.023066	292	-2.14112	1545	-1.99754e-05	1436	-1.00888e-05	1541	-0.00570355	1541	-0.00570355
ZNF318	631	0.498862	977	1	433	0.18029	456	2.09377e-05	591	4.38484e-05	1427	-0.0320718	1515	-4.49008	457	6.30538e-07	417	6.0649e-07	426	0.00388778	426	0.00388778
NFE2L2	632	0.501495	977	1	367	0.0864884	146	0.000266758	1641	-0.000229657	1483	-0.0322318	863	-3.30925	326	8.95122e-06	371	1.46186e-06	708	0.000495163	708	0.000495163
H3K9me1	633	0.501649	773	0.739157	435	0.182449	1216	-5.83095e-06	1301	-8.0021e-06	927	-0.0302993	97	-1.13347	1617	-3.19666e-05	1610	-3.69412e-05	1942	-0.0513935	1942	-0.0513935
BDP1	634	0.504416	327	0.199868	912	0.999596	777	1.52785e-06	840	6.53588e-06	921	-0.030273	888	-3.34569	1083	-1.26969e-07	1067	-1.9507e-07	1292	-0.00226628	1292	-0.00226628
CCNT2	635	0.506735	977	1	352	0.0702355	394	2.86117e-05	1502	-6.26944e-05	907	-0.0302135	1516	-4.49366	345	7.7212e-06	332	2.88689e-06	593	0.00171157	593	0.00171157
C17orf49	636	0.507918	642	0.574091	913	1	603	8.2683e-06	685	2.24769e-05	1085	-0.0309216	1199	-3.84579	1211	-7.14236e-07	1194	-8.77305e-07	711	0.000468754	711	0.000468754
CDK11A	636	0.507918	977	1	811	0.841047	624	7.10767e-06	1446	-3.61825e-05	1019	-0.0306787	653	-2.94344	1404	-5.6114e-06	1376	-5.93944e-06	1368	-0.0030443	1368	-0.0030443
ATOH8	638	0.509714	707	0.65622	913	1	677	4.8836e-06	1264	-5.91377e-06	613	-0.0287045	753	-3.10886	583	8.08136e-10	545	2.47545e-09	769	9.18571e-05	769	9.18571e-05
NCOA5	639	0.512792	622	0.545897	910	0.995136	738	2.30559e-06	1146	-9.94814e-07	1184	-0.0313272	1056	-3.59369	591	0	556	0	389	0.00446024	389	0.00446024
PRRX2	640	0.513342	977	1	360	0.0788953	661	5.52459e-06	770	1.18461e-05	1373	-0.0318764	1613	-4.75877	367	4.22266e-06	346	2.33868e-06	207	0.00889635	207	0.00889635
ZNF234	641	0.514987	351	0.226255	913	1	218	0.000108755	449	0.000112609	745	-0.0294795	950	-3.437	1353	-3.43455e-06	1448	-1.1316e-05	595	0.00168988	595	0.00168988
ORC2	642	0.518554	977	1	592	0.480663	1347	-1.46551e-05	1423	-2.80934e-05	1230	-0.0314484	1449	-4.30765	1188	-5.20445e-07	1279	-2.31224e-06	485	0.00308429	485	0.00308429
RORA	642	0.518554	242	0.0941461	913	1	280	6.65805e-05	389	0.000170172	763	-0.0295809	320	-2.21846	1248	-1.03132e-06	1278	-2.30879e-06	1227	-0.00159154	1227	-0.00159154
VEZF1	644	0.52138	977	1	417	0.15377	438	2.26854e-05	1469	-4.36808e-05	1660	-0.0329251	698	-3.01313	437	1.03228e-06	410	6.83188e-07	352	0.00533575	352	0.00533575
H2	645	0.522144	463	0.356299	604	0.508364	1450	-3.15644e-05	437	0.000121965	88	-0.017691	598	-2.84035	1291	-1.841e-06	1259	-1.8271e-06	1096	-0.000759048	1096	-0.000759048
IFI16	646	0.525756	693	0.639951	913	1	1232	-6.58783e-06	985	4.37364e-07	612	-0.0286974	934	-3.41037	1194	-5.73299e-07	1101	-3.22784e-07	1451	-0.00413516	1451	-0.00413516
ERH	646	0.525756	303	0.167141	913	1	454	2.10868e-05	307	0.000303482	986	-0.030536	374	-2.38371	1451	-8.16795e-06	1370	-5.68453e-06	1449	-0.00412891	1449	-0.00412891
TSHZ1	648	0.526465	977	1	276	0.0256942	725	2.98945e-06	1417	-2.46331e-05	991	-0.0305488	1655	-4.8713	297	1.29699e-05	279	7.60699e-06	272	0.00726617	272	0.00726617
PRMT5	649	0.529391	977	1	852	0.911689	1452	-3.17366e-05	1351	-1.2214e-05	1391	-0.0319309	1251	-3.9424	1255	-1.1715e-06	1250	-1.713e-06	1423	-0.00374555	1423	-0.00374555
DONSON	649	0.529391	183	0.0536733	913	1	219	0.000107369	276	0.000379005	663	-0.0290145	314	-2.20404	1445	-7.722e-06	1452	-1.14833e-05	1174	-0.001218	1174	-0.001218
ZNF343	651	0.533048	587	0.496061	913	1	1156	-3.6351e-06	631	3.34367e-05	1053	-0.0308109	562	-2.77728	1066	-1.03576e-07	1097	-3.02549e-07	1259	-0.00189693	1259	-0.00189693
ZNF101	651	0.533048	279	0.13439	913	1	327	4.59339e-05	834	6.84008e-06	681	-0.0291629	180	-1.7098	510	2.05997e-07	1132	-4.66548e-07	1298	-0.00228196	1298	-0.00228196
ARNTL2	653	0.540431	927	0.93975	875	0.946838	867	6.404e-08	720	1.75749e-05	1455	-0.0321695	455	-2.57221	472	4.61834e-07	397	8.53652e-07	1228	-0.00159505	1228	-0.00159505
TCFL5	653	0.540431	371	0.247291	913	1	238	9.23306e-05	210	0.000671441	523	-0.0280761	1052	-3.58877	1364	-3.83802e-06	1336	-4.00941e-06	1455	-0.00415666	1455	-0.00415666
CAMTA1	655	0.544157	977	1	515	0.327091	1212	-5.68582e-06	1233	-3.62041e-06	1383	-0.0319109	395	-2.42506	542	7.6312e-08	479	1.10553e-07	539	0.00227302	539	0.00227302
WHSC1	655	0.544157	383	0.263176	913	1	458	2.07861e-05	500	8.09892e-05	1343	-0.031806	535	-2.72189	1443	-7.63615e-06	1456	-1.20214e-05	492	0.00294224	492	0.00294224
CDYL2	657	0.545674	579	0.489302	641	0.574803	1822	-0.00112672	1738	-0.000605006	126	-0.0201755	311	-2.19552	1909	-0.000755143	1933	-0.00156672	1733	-0.0111197	1733	-0.0111197
ZNF438	658	0.547906	715	0.665288	856	0.923283	309	5.36545e-05	441	0.000118024	1457	-0.0321784	757	-3.11518	1426	-6.38509e-06	1371	-5.75851e-06	975	-0.000106393	975	-0.000106393
CDX2	658	0.547906	977	1	785	0.805739	577	9.88654e-06	992	2.93069e-07	1209	-0.0314018	1457	-4.32912	1333	-2.84718e-06	1341	-4.1032e-06	1394	-0.00342215	1394	-0.00342215
POLR3D	660	0.550547	233	0.0895867	913	1	429	2.38594e-05	683	2.25805e-05	11	0.00301174	1909	-7.69474	1263	-1.38496e-06	1151	-5.39242e-07	1545	-0.0058567	1545	-0.0058567
DPF2	661	0.553477	977	1	644	0.580529	1802	-0.000812604	1805	-0.00120782	142	-0.0211285	1165	-3.78441	177	6.06732e-05	1826	-0.000208858	1718	-0.0105533	1718	-0.0105533
ISX	662	0.555245	977	1	311	0.0399265	1750	-0.000430924	1733	-0.000575587	526	-0.0281119	1623	-4.77757	200	4.16469e-05	132	6.58483e-05	1134	-0.000975012	1134	-0.000975012
NUDT21	663	0.555474	770	0.736388	913	1	739	2.27177e-06	838	6.54377e-06	1276	-0.0315947	979	-3.47719	1025	-5.15629e-08	1029	-1.28626e-07	1293	-0.0022723	1293	-0.0022723
EGFR	663	0.555474	596	0.508186	913	1	440	2.25874e-05	777	1.13547e-05	477	-0.027661	1163	-3.77414	1289	-1.79212e-06	1255	-1.78274e-06	1459	-0.00420467	1459	-0.00420467
ZSCAN30	665	0.559293	394	0.274092	913	1	306	5.6179e-05	360	0.00022225	543	-0.0282199	1160	-3.76358	1218	-7.60847e-07	1180	-7.39051e-07	1237	-0.00170163	1237	-0.00170163
REL	666	0.563135	977	1	290	0.0289313	1090	-1.7316e-06	1254	-4.91466e-06	1461	-0.0321818	1099	-3.66214	461	6.15847e-07	366	1.62879e-06	157	0.0113581	157	0.0113581
YEATS4	667	0.567001	977	1	516	0.331255	1312	-1.15295e-05	1462	-4.01019e-05	958	-0.0304137	492	-2.6439	497	2.7078e-07	491	7.2032e-08	544	0.00224594	544	0.00224594
TSC1	668	0.569001	977	1	428	0.168002	1250	-7.39328e-06	1474	-4.48675e-05	756	-0.0295574	353	-2.31062	448	8.54546e-07	391	9.17338e-07	351	0.00534809	351	0.00534809
TDRD3	669	0.570892	636	0.566469	913	1	796	1.00348e-06	1195	-2.54075e-06	588	-0.0284645	1029	-3.54763	989	-1.42485e-08	523	1.54594e-08	1335	-0.00261938	1335	-0.00261938
LMO2	669	0.570892	977	1	913	1	1426	-2.68566e-05	762	1.2539e-05	1112	-0.0310309	692	-3.00523	1118	-1.93818e-07	1111	-3.73901e-07	1204	-0.00144864	1204	-0.00144864
ZNF23	669	0.570892	554	0.45637	743	0.738819	1463	-3.47472e-05	705	1.98207e-05	299	-0.0251478	61	-0.00229966	1301	-1.98928e-06	1374	-5.86842e-06	1294	-0.00227313	1294	-0.00227313
MYF5	669	0.570892	203	0.067461	913	1	181	0.000178168	167	0.00116726	597	-0.0285779	702	-3.02002	444	9.25682e-07	1463	-1.25225e-05	1092	-0.000722303	1092	-0.000722303
ERF	673	0.572881	977	1	675	0.62754	588	9.25785e-06	607	3.89083e-05	1945	-0.049945	1937	-10.0629	591	0	556	0	490	0.00295572	490	0.00295572
H2BK120ac	674	0.572884	977	1	400	0.135713	590	9.06003e-06	1201	-2.72061e-06	813	-0.029836	1466	-4.34444	422	1.39708e-06	381	1.12286e-06	253	0.00772352	253	0.00772352
ZNF644	675	0.576349	977	1	553	0.401096	742	2.21228e-06	1556	-0.000104314	771	-0.0296052	957	-3.44626	1241	-9.59212e-07	415	6.43965e-07	244	0.00805566	244	0.00805566
BRDT	676	0.577977	381	0.261486	765	0.777637	421	2.46286e-05	560	5.36704e-05	416	-0.0269248	985	-3.48068	591	0	556	0	703	0.000545481	703	0.000545481
ZNF165	676	0.577977	569	0.473557	913	1	561	1.11047e-05	665	2.60943e-05	579	-0.028444	1156	-3.75926	591	0	556	0	787	2.80473e-05	787	2.80473e-05
ZMYND11	678	0.578744	977	1	897	0.979022	1289	-9.93135e-06	546	5.77815e-05	1465	-0.0321924	328	-2.23242	1312	-2.26747e-06	1210	-1.04718e-06	1440	-0.00402155	1440	-0.00402155
DMTF1	679	0.580118	378	0.259369	913	1	728	2.97076e-06	983	4.44769e-07	870	-0.030083	773	-3.14749	591	0	556	0	765	9.67804e-05	765	9.67804e-05
MXD4	680	0.581956	526	0.432969	891	0.970812	596	8.71176e-06	1274	-6.32975e-06	643	-0.0289032	253	-1.99724	591	0	556	0	676	0.000800014	676	0.000800014
CPSF7	680	0.581956	977	1	282	0.026289	560	1.11468e-05	1534	-8.5986e-05	1086	-0.0309254	1835	-6.10758	323	9.21118e-06	325	3.33794e-06	442	0.00366823	442	0.00366823
FOXQ1	682	0.582707	648	0.579859	913	1	450	2.1381e-05	364	0.0002152	774	-0.0296161	1202	-3.85246	1427	-6.45612e-06	1424	-9.16048e-06	1466	-0.00436616	1466	-0.00436616
MIER3	683	0.585956	775	0.740176	871	0.942856	698	3.85502e-06	789	9.99612e-06	1740	-0.03339	530	-2.71015	591	0	556	0	626	0.00138438	626	0.00138438
H1.4K34ac	684	0.586694	977	1	793	0.816199	1467	-3.60025e-05	434	0.000122278	1298	-0.0316464	649	-2.94035	1310	-2.19617e-06	337	2.69764e-06	1397	-0.00345871	1397	-0.00345871
ZNF700	684	0.586694	369	0.244906	913	1	249	8.3024e-05	399	0.000156218	969	-0.0304511	577	-2.80661	1467	-9.66772e-06	1360	-5.31786e-06	1300	-0.00228961	1300	-0.00228961
ZNF10	686	0.589975	165	0.0450595	880	0.950812	227	9.92785e-05	286	0.000341907	272	-0.0246796	1766	-5.3911	425	1.37942e-06	1433	-1.00319e-05	653	0.000976656	653	0.000976656
ZNF114	687	0.59031	977	1	534	0.363585	1674	-0.000211454	1735	-0.000580409	520	-0.0280627	613	-2.88223	324	9.09586e-06	1635	-4.55003e-05	559	0.00203169	559	0.00203169
NEIL1	688	0.590706	853	0.85045	711	0.691726	1241	-7.09349e-06	1463	-4.01886e-05	1468	-0.0321954	113	-1.29924	1200	-5.95812e-07	1031	-1.33458e-07	555	0.00208073	555	0.00208073
GREB1	688	0.590706	340	0.216878	913	1	281	6.65422e-05	786	1.02675e-05	795	-0.0297726	940	-3.42218	1251	-1.12403e-06	1241	-1.47729e-06	622	0.00143129	622	0.00143129
MDM2	688	0.590706	977	1	723	0.710254	1468	-3.68981e-05	279	0.000372076	686	-0.0291836	1445	-4.30123	1284	-1.75348e-06	1365	-5.58432e-06	1286	-0.00219402	1286	-0.00219402
ATF7	691	0.594742	229	0.0876766	913	1	1336	-1.3833e-05	361	0.00021896	134	-0.0208665	68	-0.34199	1365	-3.83952e-06	1338	-4.05313e-06	1469	-0.00440375	1469	-0.00440375
KAT8	691	0.594742	977	1	913	1	1229	-6.51554e-06	642	3.12169e-05	1459	-0.0321796	923	-3.40007	1429	-6.47487e-06	1469	-1.30814e-05	1268	-0.00196529	1268	-0.00196529
ZNF138	693	0.59926	656	0.591523	913	1	523	1.30786e-05	1208	-2.78979e-06	988	-0.0305435	876	-3.33463	591	0	556	0	387	0.0045131	387	0.0045131
MED13	694	0.602889	977	1	711	0.691726	1471	-3.81862e-05	499	8.16685e-05	1060	-0.0308309	565	-2.78318	1270	-1.53945e-06	1359	-5.28565e-06	558	0.00203303	558	0.00203303
INSM2	695	0.60362	977	1	364	0.0838346	1772	-0.000585132	1756	-0.000674096	450	-0.027291	1432	-4.28245	273	1.85183e-05	382	1.09884e-06	616	0.00148314	616	0.00148314
DLX4	696	0.607	408	0.292511	913	1	702	3.69532e-06	864	5.15368e-06	1013	-0.0306363	659	-2.95246	1204	-6.46524e-07	1069	-2.03856e-07	682	0.00073551	682	0.00073551
RBBP5	697	0.60704	388	0.266836	913	1	990	-1.84381e-07	903	3.57431e-06	472	-0.0275887	274	-2.08763	591	0	556	0	770	8.10435e-05	770	8.10435e-05
ZNF510	698	0.609512	154	0.0382952	913	1	80	0.000550442	69	0.00459013	699	-0.0292432	1926	-8.44877	1726	-7.78637e-05	1787	-0.000142357	1635	-0.0079563	1635	-0.0079563
BRD2	698	0.609512	673	0.617704	482	0.277882	1904	-0.00401606	1917	-0.00898007	80	-0.0168617	1545	-4.55623	1838	-0.000206297	1743	-0.000102096	444	0.0036384	444	0.0036384
SOX15	700	0.611136	292	0.153144	822	0.851887	310	5.36537e-05	440	0.000118523	1473	-0.0322056	145	-1.49917	1407	-5.69533e-06	1331	-3.81662e-06	1111	-0.000862758	1111	-0.000862758
PHB2	701	0.615298	977	1	913	1	1223	-6.2466e-06	533	6.57474e-05	1404	-0.0319679	699	-3.01396	1317	-2.41436e-06	1254	-1.78233e-06	1474	-0.0045116	1474	-0.0045116
H3T45ph	702	0.619485	977	1	748	0.745295	225	0.000101536	1310	-8.51588e-06	1104	-0.0309909	1475	-4.36475	1245	-1.0168e-06	1242	-1.52991e-06	801	5.42241e-06	801	5.42241e-06
GATA3	703	0.623698	977	1	913	1	305	5.6332e-05	1476	-4.63474e-05	1382	-0.0319083	1267	-3.97756	1460	-9.02476e-06	1447	-1.12885e-05	287	0.00680778	287	0.00680778
TAL1	704	0.629766	158	0.039828	570	0.439381	156	0.000228796	274	0.000391698	195	-0.0230386	1946	-13.713	1100	-1.51703e-07	1260	-1.83953e-06	460	0.00339111	460	0.00339111
HAND2	705	0.634381	977	1	526	0.345596	1585	-9.63604e-05	1840	-0.00212976	261	-0.0244707	836	-3.26592	1647	-3.89795e-05	1724	-8.67411e-05	242	0.00808488	242	0.00808488
ZNF629	706	0.635011	977	1	267	0.0214518	1350	-1.50602e-05	1682	-0.000343264	918	-0.0302604	623	-2.90318	353	6.918e-06	330	3.11737e-06	133	0.0123389	133	0.0123389
CDC73	707	0.636491	888	0.887626	913	1	573	1.01806e-05	1337	-1.08816e-05	750	-0.0295062	899	-3.35978	998	-2.14298e-08	953	-1.44745e-08	1088	-0.000695453	1088	-0.000695453
EVX1	707	0.636491	977	1	348	0.0639256	1392	-2.14793e-05	1479	-4.74826e-05	1044	-0.0307769	813	-3.21982	336	8.35753e-06	313	4.4441e-06	343	0.00552281	343	0.00552281
IRF1	709	0.636866	372	0.248606	913	1	1730	-0.000367029	1835	-0.00195397	31	-0.00881792	1793	-5.63939	1864	-0.00028812	1879	-0.000465999	1890	-0.0225606	1890	-0.0225606
CHAT	710	0.640727	192	0.0599895	913	1	248	8.50762e-05	247	0.000492398	858	-0.0300232	316	-2.21325	1697	-5.86102e-05	1730	-9.13879e-05	1848	-0.0180312	1848	-0.0180312
TOE1	711	0.640808	977	1	489	0.294995	1201	-5.24623e-06	1149	-1.06653e-06	1444	-0.0321557	853	-3.28899	526	1.06929e-07	467	1.36083e-07	403	0.0042812	403	0.0042812
NUP214	712	0.642721	977	1	532	0.36028	1176	-4.1531e-06	708	1.94308e-05	1840	-0.0342801	830	-3.25848	1016	-3.88979e-08	1128	-4.42443e-07	383	0.00455285	383	0.00455285
TBX21	713	0.644791	162	0.0423862	525	0.342678	124	0.000316548	331	0.000264488	625	-0.0287737	471	-2.60674	1821	-0.00017255	1804	-0.000168658	1941	-0.0435945	1941	-0.0435945
BCORL1	714	0.647663	256	0.105712	913	1	1159	-3.70199e-06	479	9.00653e-05	611	-0.0286885	13	12.3532	1233	-8.67353e-07	1098	-3.14346e-07	1731	-0.0110914	1731	-0.0110914
AKAP8	715	0.648392	800	0.776702	566	0.429207	576	9.94411e-06	804	8.70821e-06	639	-0.0288828	1501	-4.44154	490	3.05295e-07	457	1.81719e-07	587	0.00177758	587	0.00177758
ASUN	716	0.651578	751	0.710879	552	0.38974	1745	-0.000402154	1706	-0.000423731	1325	-0.0317493	93	-1.08187	1690	-5.55361e-05	1659	-5.50912e-05	189	0.0099394	189	0.0099394
CCND2	717	0.655426	216	0.0788852	913	1	557	1.12624e-05	730	1.5723e-05	296	-0.0251053	183	-1.71259	591	0	556	0	1002	-0.000211786	1002	-0.000211786
POLA1	718	0.656268	821	0.795166	440	0.191708	1908	-0.00429966	1904	-0.00604677	105	-0.0187572	803	-3.195	1868	-0.000309682	1898	-0.000689507	319	0.00619958	319	0.00619958
WDR77	719	0.658339	739	0.702368	913	1	1261	-7.8806e-06	740	1.45871e-05	934	-0.0303186	251	-1.99509	1179	-4.48752e-07	1156	-5.97131e-07	1029	-0.000383504	1029	-0.000383504
MPHOSPH8	719	0.658339	977	1	687	0.650057	1484	-4.22608e-05	1413	-2.3196e-05	1011	-0.0306262	799	-3.18482	1345	-3.05306e-06	1292	-2.60944e-06	550	0.0021942	550	0.0021942
SON	721	0.667265	970	0.992922	913	1	1185	-4.41708e-06	1375	-1.53154e-05	829	-0.0298986	1366	-4.14397	1187	-5.01761e-07	1265	-1.94727e-06	1486	-0.00485871	1486	-0.00485871
SAG	722	0.667974	400	0.283379	913	1	488	1.64421e-05	621	3.54131e-05	1005	-0.0306073	687	-2.99936	976	-6.77345e-09	988	-5.12276e-08	701	0.000564128	701	0.000564128
TGIF2	723	0.671701	681	0.627576	913	1	808	7.94166e-07	1190	-2.44587e-06	1226	-0.0314424	614	-2.88333	482	3.67502e-07	959	-2.00505e-08	1070	-0.00061878	1070	-0.00061878
ZNF24	724	0.673283	977	1	913	1	611	7.94662e-06	1332	-1.0633e-05	1384	-0.0319111	246	-1.9799	591	0	556	0	473	0.0032472	473	0.0032472
INTS6	725	0.676301	898	0.892949	913	1	508	1.38847e-05	1339	-1.11035e-05	1302	-0.0316543	1089	-3.64901	1116	-1.92336e-07	1095	-2.97031e-07	689	0.000674325	689	0.000674325
THAP11	726	0.677377	107	0.0141875	913	1	98	0.000403389	140	0.00185313	752	-0.0295112	192	-1.77431	1449	-8.11709e-06	1582	-3.06799e-05	1136	-0.00097849	1136	-0.00097849
NFXL1	727	0.679582	977	1	327	0.0506444	1331	-1.37291e-05	1551	-0.000102488	1107	-0.0309971	533	-2.71599	309	1.08516e-05	267	9.01263e-06	322	0.00612998	322	0.00612998
ZMAT3	728	0.680174	977	1	492	0.302502	1152	-3.47082e-06	1228	-3.4885e-06	1642	-0.0328581	726	-3.06691	519	1.41168e-07	1184	-7.78114e-07	618	0.00147006	618	0.00147006
AATF	729	0.683471	106	0.0135549	913	1	130	0.000298258	470	9.59947e-05	393	-0.0267072	467	-2.59787	1562	-2.18749e-05	1489	-1.50227e-05	1758	-0.0123433	1758	-0.0123433
ZNF134	730	0.69006	827	0.803183	511	0.320908	1304	-1.09354e-05	815	8.07309e-06	1246	-0.0315105	599	-2.84045	539	8.68526e-08	509	4.2146e-08	520	0.00255652	520	0.00255652
LHX6	730	0.69006	197	0.0640674	913	1	289	6.43837e-05	693	2.12328e-05	665	-0.0290377	402	-2.44721	972	-5.70665e-09	527	1.28741e-08	1256	-0.0018901	1256	-0.0018901
PDX1	732	0.69283	977	1	323	0.0482744	1429	-2.77677e-05	1607	-0.000167941	1395	-0.0319388	1385	-4.17805	285	1.63512e-05	297	5.59814e-06	324	0.00610258	324	0.00610258
ZNF404	733	0.693049	977	1	547	0.38209	647	6.12997e-06	1185	-2.3422e-06	1555	-0.0324691	966	-3.46012	1231	-8.4477e-07	1056	-1.77428e-07	450	0.00350915	450	0.00350915
RPA1	734	0.694702	467	0.360049	913	1	601	8.31001e-06	712	1.86924e-05	1067	-0.030853	792	-3.16988	1099	-1.49698e-07	1093	-2.81059e-07	731	0.000280535	731	0.000280535
TEAD4	734	0.694702	356	0.229969	733	0.726007	1122	-2.49581e-06	1492	-5.65965e-05	205	-0.0232897	188	-1.75334	1161	-3.51792e-07	1131	-4.61599e-07	1370	-0.00307621	1370	-0.00307621
ZNF668	736	0.699509	977	1	306	0.0364215	1213	-5.70497e-06	1544	-9.30291e-05	1059	-0.0308308	1359	-4.13985	254	2.21828e-05	253	1.12623e-05	325	0.00610009	325	0.00610009
SMC3	737	0.704071	677	0.621455	913	1	1009	-3.57942e-07	671	2.46722e-05	1223	-0.031436	102	-1.22639	1067	-1.05113e-07	1075	-2.18259e-07	1215	-0.00152616	1215	-0.00152616
TBX2	737	0.704071	977	1	563	0.418868	516	1.34676e-05	627	3.41731e-05	1137	-0.0311223	1494	-4.42274	1078	-1.19979e-07	432	3.88067e-07	390	0.00444102	390	0.00444102
ULK3	739	0.711135	977	1	330	0.0519723	1504	-4.93405e-05	1654	-0.000260512	1015	-0.0306496	937	-3.41673	308	1.08965e-05	349	2.24933e-06	512	0.00262473	512	0.00262473
DNA2	740	0.711381	70	0.00456285	913	1	174	0.000203521	306	0.000304278	358	-0.0262195	189	-1.75572	1752	-9.49055e-05	1686	-6.89865e-05	1641	-0.00812773	1641	-0.00812773
L3MBTL2	741	0.712555	335	0.211601	913	1	138	0.000280176	196	0.000782119	541	-0.028212	1390	-4.19017	1560	-2.1796e-05	1609	-3.60953e-05	1868	-0.0201913	1868	-0.0201913
ZNF764	742	0.713553	496	0.396129	913	1	204	0.000122545	376	0.0001976	622	-0.0287607	1310	-4.04114	1203	-6.15453e-07	411	6.77279e-07	1061	-0.000586465	1061	-0.000586465
ZNF513	742	0.713553	977	1	913	1	1453	-3.29637e-05	378	0.000191718	530	-0.028152	1496	-4.42683	1135	-2.47823e-07	1178	-7.25067e-07	621	0.00143375	621	0.00143375
BEND3	742	0.713553	977	1	580	0.461542	1118	-2.40363e-06	1496	-6.03822e-05	539	-0.0282084	651	-2.94222	384	3.14529e-06	518	2.53436e-08	767	9.58638e-05	767	9.58638e-05
XRCC1	745	0.717615	977	1	484	0.281627	1578	-9.2106e-05	1652	-0.000256057	640	-0.0288922	571	-2.79552	1232	-8.59779e-07	219	1.83226e-05	295	0.00666308	295	0.00666308
SMARCAL1	746	0.72315	684	0.629413	913	1	478	1.74084e-05	516	7.27654e-05	1244	-0.0315093	741	-3.08824	1062	-9.56206e-08	999	-7.01527e-08	1498	-0.00502606	1498	-0.00502606
FOXM1	746	0.72315	977	1	913	1	691	4.08099e-06	601	4.02827e-05	895	-0.0301649	1489	-4.40386	1123	-2.12693e-07	1022	-1.17283e-07	565	0.00199465	565	0.00199465
TP53	748	0.727728	241	0.094019	913	1	1790	-0.000736105	71	0.00449929	230	-0.0238775	370	-2.36849	1722	-7.66386e-05	1736	-9.63119e-05	642	0.0011713	642	0.0011713
ZNF717	749	0.732863	815	0.789077	612	0.525129	428	2.38651e-05	259	0.000444723	809	-0.0298241	1500	-4.44113	346	7.47427e-06	1298	-2.66051e-06	1121	-0.000904283	1121	-0.000904283
HK2	749	0.732863	312	0.179034	913	1	529	1.2748e-05	220	0.00059525	896	-0.0301713	181	-1.71068	1481	-1.11122e-05	1500	-1.63464e-05	1287	-0.00220425	1287	-0.00220425
ZNF83	751	0.7335	246	0.0966383	913	1	622	7.20506e-06	768	1.20111e-05	281	-0.0248508	425	-2.5018	591	0	556	0	1020	-0.000305337	1020	-0.000305337
RBL2	752	0.73422	228	0.0874242	913	1	148	0.000256985	235	0.000532921	479	-0.0276945	749	-3.10542	1804	-0.000149713	1781	-0.000134142	1907	-0.0258766	1907	-0.0258766
PRDM1	753	0.742694	462	0.356017	913	1	627	7.01348e-06	904	3.5712e-06	976	-0.0305036	1064	-3.60655	1159	-3.45264e-07	1157	-6.09968e-07	1482	-0.00475809	1482	-0.00475809
ZBTB24	753	0.742694	977	1	735	0.729193	1341	-1.42242e-05	1486	-5.13337e-05	1502	-0.0322936	1260	-3.96817	501	2.5308e-07	449	2.2511e-07	1102	-0.000780169	1102	-0.000780169
SLFN5	753	0.742694	977	1	913	1	206	0.000119297	1467	-4.13211e-05	946	-0.0303683	984	-3.48009	1300	-1.94805e-06	1263	-1.92989e-06	1135	-0.000976098	1135	-0.000976098
BCL10	756	0.748517	977	1	507	0.319098	681	4.51446e-06	1528	-8.19045e-05	636	-0.0288664	1357	-4.1361	407	2.12575e-06	438	3.73262e-07	586	0.00177956	586	0.00177956
RCOR2	757	0.751163	594	0.506317	555	0.406949	682	4.40831e-06	587	4.43957e-05	1506	-0.0323171	81	-0.725262	1174	-4.15933e-07	1090	-2.66409e-07	503	0.00275544	503	0.00275544
NUSAP1	757	0.751163	342	0.217271	555	0.406949	290	6.33259e-05	243	0.000504856	499	-0.0278725	1801	-5.76366	378	3.42257e-06	1244	-1.56578e-06	1225	-0.00158569	1225	-0.00158569
SMAD9	759	0.751775	418	0.305425	913	1	1024	-5.61011e-07	843	6.30506e-06	661	-0.0289989	906	-3.37218	591	0	556	0	683	0.000724458	683	0.000724458
RCOR1	759	0.751775	418	0.305425	913	1	1013	-4.28785e-07	927	2.44221e-06	983	-0.0305293	1024	-3.53972	591	0	556	0	963	-6.4813e-05	963	-6.4813e-05
H1.X	761	0.752643	504	0.406465	913	1	628	7.0093e-06	1395	-1.87296e-05	580	-0.0284459	151	-1.55039	1131	-2.28907e-07	1113	-3.78829e-07	1504	-0.00515801	1504	-0.00515801
NR4A2	761	0.752643	765	0.730588	761	0.771674	785	1.28679e-06	761	1.25484e-05	626	-0.0287743	1504	-4.45073	1168	-3.89708e-07	1086	-2.59008e-07	1093	-0.000725801	1093	-0.000725801
POLR3GL	761	0.752643	793	0.767253	913	1	1408	-2.37745e-05	585	4.5482e-05	971	-0.0304553	101	-1.19824	1274	-1.6065e-06	1253	-1.77622e-06	1138	-0.000984748	1138	-0.000984748
MYF6	761	0.752643	977	1	689	0.652962	1117	-2.39507e-06	1504	-6.41105e-05	1257	-0.0315453	1061	-3.60237	1307	-2.15001e-06	1346	-4.43229e-06	1345	-0.00275117	1345	-0.00275117
SUPT5H	765	0.75428	548	0.450961	913	1	1652	-0.000171698	297	0.000318972	216	-0.0234507	734	-3.08007	1772	-0.000111116	1783	-0.000138952	1863	-0.0197794	1863	-0.0197794
CASP8AP2	766	0.756397	405	0.290208	913	1	874	0	1004	0	995	-0.0305678	630	-2.90895	591	0	556	0	825	1.02281e-10	825	1.02281e-10
FBP1	766	0.756397	288	0.149142	913	1	832	4.43242e-07	856	5.58518e-06	832	-0.0299123	377	-2.38911	591	0	556	0	1025	-0.000351863	1025	-0.000351863
ZGPAT	768	0.757662	977	1	913	1	1448	-3.13368e-05	651	2.9591e-05	1311	-0.0316861	909	-3.37489	1438	-7.07905e-06	1410	-7.93184e-06	1505	-0.00516776	1505	-0.00516776
PRDM6	769	0.758139	802	0.778828	913	1	828	4.90563e-07	1294	-7.62264e-06	349	-0.0260458	436	-2.5357	591	0	556	0	675	0.000810794	675	0.000810794
H3.6	770	0.762711	965	0.985532	913	1	1437	-2.92129e-05	1471	-4.42606e-05	133	-0.0208615	708	-3.03371	1506	-1.3917e-05	1477	-1.35903e-05	1162	-0.0011608	1162	-0.0011608
ZNF257	770	0.762711	977	1	678	0.641405	1506	-5.16876e-05	498	8.17586e-05	509	-0.0279731	1048	-3.58254	552	3.88691e-08	1342	-4.26223e-06	1270	-0.0019904	1270	-0.0019904
AUTS2	772	0.767791	977	1	913	1	1143	-3.18013e-06	874	4.69166e-06	1507	-0.0323239	1200	-3.84732	575	6.9704e-09	942	-7.61512e-09	1470	-0.00441269	1470	-0.00441269
DLX5	772	0.767791	473	0.372712	913	1	1487	-4.384e-05	267	0.000407373	1411	-0.0320081	114	-1.31028	1257	-1.19334e-06	1240	-1.47575e-06	1507	-0.0051969	1507	-0.0051969
CREBBP	774	0.76785	849	0.842128	630	0.561094	540	1.2233e-05	830	7.10646e-06	1562	-0.0325089	718	-3.05511	591	0	556	0	418	0.00399832	418	0.00399832
ZNF414	775	0.772901	535	0.437095	913	1	320	4.8124e-05	816	8.01711e-06	1120	-0.0310571	283	-2.10892	563	1.79947e-08	1055	-1.76484e-07	1151	-0.00107253	1151	-0.00107253
NANOG	776	0.774432	977	1	495	0.305581	424	2.42083e-05	531	6.64445e-05	1669	-0.0329703	1747	-5.2612	442	9.66198e-07	488	8.12928e-08	651	0.000998486	651	0.000998486
HMGA1	777	0.778042	977	1	750	0.748551	735	2.46893e-06	1159	-1.26013e-06	1509	-0.0323271	1499	-4.4368	1239	-9.5267e-07	1053	-1.74672e-07	421	0.0039374	421	0.0039374
ZFP1	777	0.778042	977	1	913	1	1462	-3.45864e-05	1509	-6.69542e-05	476	-0.0276281	1075	-3.62717	1495	-1.26317e-05	1449	-1.13296e-05	1311	-0.00239947	1311	-0.00239947
RARG	779	0.779292	537	0.440197	563	0.418868	350	3.95133e-05	1547	-0.000100306	79	-0.0168379	647	-2.93663	1180	-4.53812e-07	1155	-5.78164e-07	1250	-0.00182385	1250	-0.00182385
ZNF670	780	0.779834	914	0.918201	449	0.223966	672	5.13868e-06	662	2.66375e-05	1622	-0.0327651	859	-3.30466	465	5.56864e-07	486	8.64938e-08	400	0.004305	400	0.004305
HOXB5	781	0.779984	173	0.0489784	913	1	648	6.09426e-06	400	0.00015491	92	-0.0178582	40	2.41378	1008	-3.0689e-08	1076	-2.1899e-07	1159	-0.00114363	1159	-0.00114363
BBX	782	0.783213	977	1	913	1	631	6.90581e-06	1221	-3.23274e-06	1448	-0.0321608	1079	-3.6341	973	-6.44467e-09	954	-1.57682e-08	1277	-0.00206891	1277	-0.00206891
ZNF20	783	0.785557	352	0.227897	913	1	89	0.00045904	204	0.000703919	1872	-0.0350075	1086	-3.64123	1766	-0.000102755	1767	-0.000124899	1860	-0.0192428	1860	-0.0192428
GRHL3	783	0.785557	643	0.575048	475	0.26746	1862	-0.00205186	1908	-0.00639325	204	-0.0232576	341	-2.27625	1920	-0.000983571	1919	-0.00101739	1940	-0.0394185	1940	-0.0394185
BRF2	785	0.789362	404	0.289061	913	1	874	0	1004	0	919	-0.0302608	585	-2.81808	591	0	556	0	879	-1.78706e-41	879	-1.78706e-41
ZNF645	786	0.792515	856	0.855013	598	0.496445	708	3.51298e-06	689	2.19168e-05	1671	-0.03298	835	-3.26571	483	3.67067e-07	419	5.05917e-07	613	0.0014954	613	0.0014954
GPBP1L1	787	0.793649	977	1	913	1	632	6.86163e-06	901	3.68939e-06	1449	-0.0321618	747	-3.09829	558	2.76265e-08	1030	-1.32134e-07	477	0.0032145	477	0.0032145
AFF1	787	0.793649	977	1	500	0.310773	1073	-1.26741e-06	1163	-1.39805e-06	1512	-0.0323316	454	-2.57142	534	9.15157e-08	502	5.07892e-08	423	0.00392433	423	0.00392433
HMGN1	787	0.793649	977	1	913	1	1446	-3.1215e-05	573	5.00435e-05	939	-0.0303484	1215	-3.87781	1512	-1.47916e-05	1478	-1.36273e-05	1415	-0.00366515	1415	-0.00366515
SIRT3	790	0.798913	523	0.430885	619	0.538051	1116	-2.33257e-06	692	2.15939e-05	657	-0.0289772	874	-3.33246	540	7.95498e-08	435	3.78484e-07	628	0.00136404	628	0.00136404
GTF2B	790	0.798913	977	1	605	0.510731	1513	-5.30353e-05	1448	-3.63644e-05	892	-0.0301582	632	-2.91275	434	1.09579e-06	1123	-4.33244e-07	575	0.00194358	575	0.00194358
ZNF155	792	0.799386	977	1	437	0.188809	1624	-0.000130595	1688	-0.00037869	490	-0.0278005	1619	-4.769	334	8.57079e-06	314	4.39588e-06	463	0.00333755	463	0.00333755
PAX6	793	0.803819	977	1	399	0.134977	1544	-7.13989e-05	1683	-0.000350304	670	-0.0290795	995	-3.49244	267	1.97583e-05	1035	-1.38427e-07	346	0.00546051	346	0.00546051
ZNF436	794	0.80421	977	1	913	1	1260	-7.84893e-06	543	5.85965e-05	792	-0.0297486	1514	-4.47959	1237	-9.20783e-07	1158	-6.1291e-07	1236	-0.0016893	1236	-0.0016893
ZKSCAN5	795	0.809537	977	1	630	0.561094	1296	-1.04069e-05	626	3.45568e-05	1021	-0.0306856	1405	-4.22511	452	7.96782e-07	475	1.15104e-07	636	0.00124544	636	0.00124544
MAFF	795	0.809537	977	1	759	0.768335	1202	-5.37296e-06	647	3.01416e-05	1515	-0.0323417	936	-3.41576	1278	-1.66684e-06	1229	-1.27901e-06	1024	-0.000345682	1024	-0.000345682
SKIL	797	0.811608	977	1	291	0.0292113	1660	-0.000187618	1676	-0.000331695	926	-0.0302955	1206	-3.86003	186	5.30648e-05	492	7.07744e-08	467	0.00331809	467	0.00331809
HOXB4	798	0.81212	977	1	462	0.250834	606	8.17247e-06	658	2.81816e-05	1575	-0.0325736	955	-3.44407	502	2.4248e-07	440	3.45794e-07	452	0.00349814	452	0.00349814
MKI67	799	0.812649	713	0.663015	913	1	756	1.94767e-06	1256	-5.23186e-06	463	-0.0275329	203	-1.82201	591	0	556	0	774	6.56864e-05	774	6.56864e-05
TBX3	800	0.818729	646	0.577986	783	0.802704	1656	-0.00017977	253	0.000469485	342	-0.0259138	1676	-4.94625	1746	-8.85101e-05	1750	-0.000107822	318	0.00621558	318	0.00621558
ZBTB6	800	0.818729	646	0.577986	624	0.550581	1236	-6.85364e-06	342	0.000247799	319	-0.0254966	1352	-4.12807	1855	-0.000257638	1828	-0.000211345	1933	-0.0343811	1933	-0.0343811
ZNF25	802	0.820288	651	0.581815	913	1	574	9.98092e-06	1270	-6.18513e-06	719	-0.0293414	566	-2.78725	1009	-3.26026e-08	1079	-2.29363e-07	631	0.00132588	631	0.00132588
ILK	802	0.820288	977	1	773	0.788553	372	3.24629e-05	679	2.31033e-05	1517	-0.0323465	1358	-4.13798	1296	-1.90991e-06	1315	-3.1053e-06	1389	-0.00336664	1389	-0.00336664
ZNF713	802	0.820288	689	0.63606	731	0.722833	744	2.14096e-06	1517	-7.26039e-05	546	-0.0282369	105	-1.2395	1369	-3.87958e-06	1287	-2.4778e-06	1150	-0.00105826	1150	-0.00105826
H3K28ac	802	0.820288	977	1	875	0.946838	1517	-5.48168e-05	1243	-3.96508e-06	1505	-0.0323036	1367	-4.14402	1405	-5.63781e-06	1432	-9.94175e-06	1378	-0.00322091	1378	-0.00322091
ZSCAN32	806	0.825711	977	1	913	1	980	-1.09754e-07	623	3.48379e-05	1177	-0.0312874	1505	-4.45287	1288	-1.78549e-06	1269	-2.07608e-06	1518	-0.00536368	1518	-0.00536368
ATOH1	807	0.831167	977	1	506	0.318864	1248	-7.33263e-06	1194	-2.514e-06	1482	-0.0322294	1519	-4.50418	430	1.31098e-06	414	6.44878e-07	538	0.00229859	538	0.00229859
TOX	807	0.831167	845	0.837001	682	0.644278	251	8.11393e-05	1519	-7.6081e-05	828	-0.0298964	654	-2.9443	372	3.98396e-06	1138	-5.01216e-07	1163	-0.00116591	1163	-0.00116591
HDAC6	809	0.836655	977	1	913	1	1361	-1.68382e-05	1411	-2.30234e-05	765	-0.029589	209	-1.8311	1128	-2.25537e-07	1091	-2.71129e-07	1520	-0.00539827	1520	-0.00539827
H3.7	809	0.836655	977	1	913	1	1137	-2.86679e-06	861	5.3832e-06	1460	-0.0321809	810	-3.21544	1086	-1.36796e-07	1130	-4.46408e-07	982	-0.000131882	982	-0.000131882
H1.4S187ph	811	0.838331	421	0.306619	913	1	874	0	1004	0	768	-0.029594	716	-3.05426	591	0	556	0	860	1.05685e-41	860	1.05685e-41
ZNF512B	812	0.839777	977	1	681	0.643274	637	6.58406e-06	1234	-3.73392e-06	1624	-0.0327676	347	-2.29034	532	9.37283e-08	473	1.22639e-07	663	0.000856682	663	0.000856682
U2AF1	813	0.842176	468	0.360218	913	1	1186	-4.42371e-06	826	7.55798e-06	65	-0.0144882	262	-2.01641	543	6.98826e-08	984	-4.71115e-08	1001	-0.000208455	1001	-0.000208455
MYNN	814	0.843184	745	0.706834	913	1	443	2.21725e-05	1263	-5.90469e-06	944	-0.0303675	391	-2.4196	1160	-3.46135e-07	1134	-4.79361e-07	1233	-0.00165633	1233	-0.00165633
SCML4	815	0.84353	666	0.609699	913	1	732	2.77372e-06	718	1.78384e-05	659	-0.0289928	1769	-5.41026	591	0	556	0	782	3.75552e-05	782	3.75552e-05
SUPT16H	815	0.84353	881	0.881074	772	0.788323	586	9.42261e-06	732	1.55109e-05	1631	-0.0328159	845	-3.27972	561	2.4168e-08	512	3.56123e-08	706	0.00052206	706	0.00052206
TEAD3	817	0.847729	827	0.803183	913	1	477	1.74285e-05	630	3.34875e-05	1304	-0.0316597	954	-3.44221	1253	-1.14305e-06	1247	-1.64142e-06	1231	-0.00164479	1231	-0.00164479
C17orf96	817	0.847729	977	1	902	0.982932	1522	-5.84898e-05	310	0.000299494	1055	-0.0308175	1072	-3.62255	1483	-1.12473e-05	1401	-7.38138e-06	308	0.00642919	308	0.00642919
ZNF560	817	0.847729	879	0.87845	913	1	1344	-1.44481e-05	232	0.000541915	536	-0.0281999	844	-3.2782	1037	-6.0045e-08	273	8.43525e-06	1522	-0.00545112	1522	-0.00545112
STAT6	820	0.848756	882	0.883701	602	0.507337	653	5.8779e-06	828	7.37437e-06	1352	-0.0318283	846	-3.28108	508	2.17689e-07	464	1.41963e-07	617	0.00147716	617	0.00147716
LMO3	821	0.853315	830	0.808122	913	1	512	1.35608e-05	576	4.89544e-05	1306	-0.0316637	1049	-3.58413	1093	-1.43779e-07	1014	-1.00943e-07	1523	-0.00545144	1523	-0.00545144
ZNF581	821	0.853315	977	1	802	0.830322	572	1.02942e-05	1436	-3.18242e-05	1523	-0.0323519	1420	-4.24819	1193	-5.47508e-07	1182	-7.48354e-07	1401	-0.00349562	1401	-0.00349562
FOXN3	821	0.853315	977	1	913	1	1416	-2.48457e-05	1523	-7.76246e-05	1117	-0.0310459	213	-1.85513	1497	-1.30403e-05	1438	-1.03515e-05	1418	-0.0037132	1418	-0.0037132
FOXB1	821	0.853315	977	1	806	0.83224	1523	-5.89733e-05	298	0.000317719	493	-0.0278154	1468	-4.34645	217	3.39359e-05	1485	-1.41343e-05	1030	-0.000383812	1030	-0.000383812
HOXA7	825	0.853379	977	1	576	0.449946	1065	-1.15697e-06	555	5.49217e-05	1157	-0.0312084	1603	-4.73184	1182	-4.6144e-07	1187	-7.9363e-07	1265	-0.00194191	1265	-0.00194191
TIGD6	826	0.855261	186	0.0556311	913	1	67	0.000736385	97	0.00302068	853	-0.0300072	1727	-5.16335	1675	-4.84586e-05	1704	-7.58208e-05	1497	-0.00499213	1497	-0.00499213
LIN54	827	0.858935	977	1	913	1	737	2.33328e-06	600	4.03229e-05	1124	-0.0310663	1379	-4.17007	1119	-1.9645e-07	1094	-2.9351e-07	1266	-0.00194617	1266	-0.00194617
BRCA1	828	0.862021	272	0.125591	913	1	169	0.000208569	136	0.00193542	820	-0.0298642	633	-2.91429	1771	-0.000111016	1733	-9.28544e-05	1824	-0.0160542	1824	-0.0160542
ZNF518A	829	0.864587	977	1	536	0.370285	1380	-1.8955e-05	1326	-1.01117e-05	1525	-0.0323576	408	-2.46108	562	2.08564e-08	511	3.69334e-08	394	0.00437948	394	0.00437948
STAG2	830	0.868035	977	1	293	0.0318266	1764	-0.000515872	1665	-0.000295781	915	-0.0302471	1208	-3.86476	216	3.42543e-05	189	2.78694e-05	501	0.00277384	501	0.00277384
CSRNP3	831	0.868793	422	0.307818	913	1	874	0	1004	0	807	-0.0298176	1026	-3.54443	591	0	556	0	905	-9.12965e-12	905	-9.12965e-12
H2A.Z.1	832	0.870274	692	0.639379	913	1	1275	-8.60743e-06	655	2.90029e-05	83	-0.0174729	1115	-3.68968	1001	-2.45986e-08	521	1.81087e-08	1246	-0.00180111	1246	-0.00180111
CNOT3	833	0.870595	188	0.056744	913	1	1609	-0.000121942	98	0.00301818	1914	-0.0381258	21	7.0693	1569	-2.30105e-05	1494	-1.57774e-05	1395	-0.00342617	1395	-0.00342617
TCF3	833	0.870595	778	0.746198	796	0.817847	1901	-0.00378316	1894	-0.00494862	98	-0.0182908	1427	-4.27207	1924	-0.0011105	1889	-0.000556347	1745	-0.011901	1745	-0.011901
ESRRA	835	0.873783	977	1	554	0.402598	1673	-0.000210098	277	0.000378471	669	-0.0290724	1641	-4.82411	1767	-0.000103526	1628	-4.21969e-05	412	0.00411525	412	0.00411525
NCAPH2	836	0.87407	977	1	376	0.101193	1191	-4.67824e-06	1562	-0.000107797	900	-0.0301761	1041	-3.56746	389	2.9099e-06	323	3.47579e-06	344	0.00550654	344	0.00550654
STAT4	837	0.874449	977	1	462	0.250834	1306	-1.10832e-05	1378	-1.5622e-05	1759	-0.0335115	486	-2.63297	477	4.12792e-07	444	3.04024e-07	502	0.00277324	502	0.00277324
ZNF473	837	0.874449	137	0.0274861	913	1	162	0.000219435	160	0.00131521	1143	-0.0311439	241	-1.95171	1817	-0.000163853	1778	-0.000132099	1753	-0.0121962	1753	-0.0121962
BCLAF1	839	0.875993	977	1	913	1	782	1.3915e-06	1480	-4.83009e-05	1258	-0.0315468	524	-2.70455	1260	-1.271e-06	402	7.79205e-07	1527	-0.00554253	1527	-0.00554253
RFX7	840	0.884567	977	1	582	0.462904	1636	-0.000152966	350	0.000231186	955	-0.0304028	634	-2.91828	270	1.94243e-05	177	3.4166e-05	1271	-0.0020133	1271	-0.0020133
HMG20B	841	0.887535	977	1	913	1	719	3.10888e-06	1309	-8.48599e-06	1529	-0.0323674	1361	-4.14233	488	3.22819e-07	405	7.67581e-07	1376	-0.00315849	1376	-0.00315849
ZNF331	841	0.887535	184	0.0542004	913	1	275	6.96752e-05	305	0.000304345	695	-0.0292185	19	7.88075	1381	-4.45742e-06	1172	-7.06135e-07	1529	-0.00559693	1529	-0.00559693
HOXD11	843	0.889853	977	1	584	0.465093	1237	-6.87546e-06	1613	-0.00017922	959	-0.0304163	297	-2.15512	988	-1.40541e-08	1272	-2.25544e-06	697	0.000590295	697	0.000590295
ZNF586	844	0.893356	977	1	913	1	1224	-6.30966e-06	1346	-1.16122e-05	1158	-0.0312122	1469	-4.34787	971	-5.62162e-09	525	1.47761e-08	1274	-0.00202862	1274	-0.00202862
KANSL3	844	0.893356	977	1	699	0.676596	293	6.2804e-05	1530	-8.52676e-05	953	-0.0303955	1192	-3.83522	1305	-2.14474e-06	1326	-3.5928e-06	1354	-0.00288723	1354	-0.00288723
XRCC3	846	0.893867	682	0.62867	596	0.492048	321	4.79806e-05	359	0.000222287	1034	-0.0307437	1719	-5.13054	475	4.29259e-07	1202	-9.44598e-07	505	0.00272176	505	0.00272176
NR0B2	847	0.895165	313	0.179736	585	0.467292	452	2.12868e-05	394	0.000165218	466	-0.027554	1642	-4.82659	473	4.61581e-07	1040	-1.51955e-07	1201	-0.00143481	1201	-0.00143481
MIER2	847	0.895165	977	1	585	0.467292	1071	-1.21815e-06	1543	-9.03899e-05	1033	-0.0307417	949	-3.43572	1207	-6.87707e-07	383	1.07622e-06	1273	-0.002028	1273	-0.002028
SOX5	849	0.899213	211	0.0750663	913	1	566	1.07065e-05	721	1.7365e-05	651	-0.0289505	281	-2.10232	1170	-3.98931e-07	1149	-5.3646e-07	1531	-0.0056135	1531	-0.0056135
MIER1	849	0.899213	968	0.989108	913	1	1531	-6.49098e-05	480	8.9515e-05	885	-0.0301441	242	-1.958	1457	-8.85784e-06	1437	-1.02369e-05	454	0.0034768	454	0.0034768
FOXO1	851	0.905103	977	1	913	1	1062	-1.11862e-06	1130	-5.3904e-07	310	-0.025341	1531	-4.53071	1080	-1.22982e-07	997	-6.83083e-08	1456	-0.00416202	1456	-0.00416202
CDC16	851	0.905103	977	1	913	1	1435	-2.88894e-05	1484	-4.95014e-05	999	-0.0305774	348	-2.29211	1498	-1.32734e-05	1479	-1.36694e-05	1532	-0.00561978	1532	-0.00561978
ELAVL1	853	0.911029	977	1	913	1	1265	-8.02012e-06	686	2.23946e-05	993	-0.0305552	1378	-4.16977	1149	-2.74584e-07	1011	-9.70654e-08	1222	-0.00157865	1222	-0.00157865
H3.3B	854	0.916039	455	0.34674	581	0.462058	532	1.24972e-05	879	4.38897e-06	755	-0.0295383	1057	-3.59708	514	1.74772e-07	471	1.25844e-07	600	0.00165733	600	0.00165733
CXXC5	855	0.916668	977	1	588	0.476171	1067	-1.18716e-06	929	2.24714e-06	796	-0.0297774	1924	-8.325	1094	-1.44161e-07	1192	-8.6038e-07	326	0.00609552	326	0.00609552
ZNF347	855	0.916668	977	1	588	0.476171	621	7.21323e-06	969	7.89792e-07	1634	-0.0328294	429	-2.51305	1206	-6.63072e-07	1112	-3.75735e-07	508	0.00271366	508	0.00271366
ZNF548	857	0.921405	465	0.356999	913	1	874	0	1004	0	478	-0.0276852	45	1.81133	591	0	556	0	889	-1.1895e-29	889	-1.1895e-29
HOXC8	858	0.926794	430	0.317531	913	1	874	0	1004	0	674	-0.029136	686	-2.99855	591	0	556	0	903	-5.11565e-12	903	-5.11565e-12
NFYB	858	0.926794	977	1	516	0.331255	865	7.32089e-08	913	2.97676e-06	1041	-0.0307702	1588	-4.68138	544	6.38712e-08	463	1.47428e-07	374	0.00483133	374	0.00483133
ZNF57	860	0.929015	304	0.168104	913	1	692	4.05861e-06	727	1.62535e-05	882	-0.0301267	144	-1.48826	1085	-1.32396e-07	1083	-2.40874e-07	1028	-0.000375648	1028	-0.000375648
RBM17	860	0.929015	977	1	913	1	778	1.51747e-06	1536	-8.69765e-05	1323	-0.0317472	1331	-4.09048	1377	-4.30962e-06	1334	-3.86956e-06	1481	-0.00470437	1481	-0.00470437
IKZF4	860	0.929015	977	1	913	1	1536	-6.75522e-05	548	5.70253e-05	1118	-0.031046	301	-2.16805	1472	-1.03e-05	1398	-7.17398e-06	1312	-0.00241013	1312	-0.00241013
ZHX1	863	0.932207	481	0.380727	913	1	874	0	1004	0	508	-0.02797	443	-2.54263	591	0	556	0	832	2.90336e-24	832	2.90336e-24
ZBTB1	864	0.935081	977	1	913	1	1321	-1.25039e-05	1414	-2.32486e-05	1537	-0.0324147	350	-2.29602	496	2.76818e-07	433	3.81163e-07	1071	-0.000622149	1071	-0.000622149
ING4	864	0.935081	967	0.988325	748	0.745295	470	1.85504e-05	468	9.63496e-05	975	-0.0304937	1537	-4.53695	1376	-4.3046e-06	1332	-3.8351e-06	1249	-0.00182191	1249	-0.00182191
FOXD3	864	0.935081	977	1	550	0.387711	1537	-6.86166e-05	866	5.15202e-06	727	-0.0293735	1456	-4.32314	1138	-2.59563e-07	1042	-1.5609e-07	754	0.000149241	754	0.000149241
TSC22D4	867	0.937643	474	0.373738	913	1	874	0	1004	0	396	-0.0267265	752	-3.10652	591	0	556	0	820	2.64983e-09	820	2.64983e-09
ZNF544	867	0.937643	458	0.352019	913	1	1061	-1.10893e-06	957	1.10673e-06	656	-0.028972	129	-1.38871	591	0	556	0	964	-7.06426e-05	964	-7.06426e-05
PKM	869	0.938587	977	1	406	0.146309	1281	-9.09405e-06	1576	-0.000120301	960	-0.0304197	1189	-3.82958	438	1.02758e-06	483	9.11856e-08	373	0.00484093	373	0.00484093
ZNF778	870	0.941182	568	0.472464	913	1	1142	-3.17461e-06	821	7.91379e-06	962	-0.030426	1006	-3.51569	1157	-3.19218e-07	1049	-1.72245e-07	1310	-0.00238556	1310	-0.00238556
HIVEP3	870	0.941182	977	1	913	1	1125	-2.55882e-06	609	3.76191e-05	1498	-0.0322848	847	-3.28145	1176	-4.43487e-07	1143	-5.20518e-07	1538	-0.00566629	1538	-0.00566629
ZFP30	870	0.941182	977	1	907	0.987209	1356	-1.53814e-05	551	5.57277e-05	1538	-0.0324181	143	-1.47217	515	1.68132e-07	996	-6.54763e-08	560	0.0020284	560	0.0020284
NRF1	873	0.941861	804	0.781232	816	0.843546	1893	-0.00317718	1907	-0.00622262	103	-0.0185707	1527	-4.52572	1814	-0.000159653	1772	-0.000130358	1795	-0.014084	1795	-0.014084
GTF2F1	874	0.946787	522	0.429342	724	0.711931	864	7.81696e-08	1115	-1.88993e-07	691	-0.0291973	664	-2.96516	591	0	556	0	684	0.000721737	684	0.000721737
PITX3	875	0.948602	804	0.781232	913	1	1498	-4.66648e-05	1605	-0.000162395	764	-0.029584	103	-1.23058	1590	-2.67103e-05	1474	-1.33602e-05	1909	-0.0264016	1909	-0.0264016
MLL-AF6	876	0.949703	603	0.516982	913	1	595	8.74265e-06	769	1.18845e-05	1168	-0.0312732	452	-2.56783	1172	-4.06428e-07	1127	-4.39113e-07	1194	-0.00141266	1194	-0.00141266
STAT5A	877	0.953493	977	1	913	1	1540	-6.96182e-05	1532	-8.55111e-05	1335	-0.0317845	601	-2.85113	1517	-1.56051e-05	1539	-2.19787e-05	1424	-0.00375327	1424	-0.00375327
SMARCD1	878	0.956574	226	0.0869889	913	1	101	0.000391379	146	0.00170717	1587	-0.0325945	360	-2.34522	1795	-0.000140217	1870	-0.000408584	1704	-0.00985358	1704	-0.00985358
TFAM	878	0.956574	558	0.461801	913	1	301	5.83323e-05	178	0.00100342	779	-0.0296626	1164	-3.78257	1753	-9.53348e-05	1713	-8.00826e-05	1879	-0.0216826	1879	-0.0216826
MED30	880	0.959627	439	0.328732	913	1	874	0	1004	0	680	-0.0291587	561	-2.77452	591	0	556	0	891	-1.89198e-29	891	-1.89198e-29
ZNF212	881	0.959703	942	0.958711	913	1	1242	-7.11729e-06	1333	-1.07122e-05	1363	-0.0318446	1157	-3.7602	551	3.97072e-08	1050	-1.73836e-07	594	0.0017102	594	0.0017102
CCDC101	881	0.959703	977	1	674	0.621592	1541	-6.9843e-05	1408	-2.25076e-05	696	-0.0292186	824	-3.24276	1246	-1.02773e-06	1335	-3.90289e-06	1305	-0.00232809	1305	-0.00232809
SRSF4	883	0.960925	410	0.295268	913	1	354	3.84401e-05	558	5.42057e-05	202	-0.0232073	1285	-4.00598	1109	-1.70231e-07	1150	-5.36641e-07	973	-9.42733e-05	973	-9.42733e-05
ZNF395	884	0.964463	196	0.0636349	913	1	100	0.000395697	104	0.00271295	1941	-0.0447033	1935	-9.65731	1638	-3.64874e-05	1600	-3.31802e-05	1819	-0.0157777	1819	-0.0157777
CD74	885	0.965949	954	0.974656	787	0.809213	466	1.90869e-05	1382	-1.60836e-05	1542	-0.032432	265	-2.02965	1205	-6.59777e-07	1118	-4.09179e-07	619	0.00144212	619	0.00144212
RHOXF2B	885	0.965949	977	1	743	0.738819	1542	-7.01933e-05	1538	-8.74174e-05	1038	-0.0307566	922	-3.39991	1374	-4.20744e-06	1308	-2.95315e-06	1012	-0.000251424	1012	-0.000251424
MLL-AF10	887	0.970762	442	0.33253	913	1	874	0	1004	0	811	-0.0298307	140	-1.46327	591	0	556	0	846	5.73299e-31	846	5.73299e-31
GATA1	888	0.972232	200	0.0655594	913	1	646	6.17771e-06	697	2.08008e-05	673	-0.0291295	100	-1.17413	1342	-3.04498e-06	1258	-1.82216e-06	1543	-0.00579863	1543	-0.00579863
TFE3	889	0.972654	125	0.0219423	913	1	188	0.000156043	223	0.000565544	1779	-0.0337528	135	-1.42446	1398	-5.29462e-06	1403	-7.57197e-06	1457	-0.0041748	1457	-0.0041748
ZNF678	890	0.981992	459	0.3528	913	1	1069	-1.18894e-06	899	3.8038e-06	54	-0.0130765	259	-2.01216	591	0	556	0	1004	-0.000216905	1004	-0.000216905
H3T11ph	891	0.984907	659	0.596742	913	1	635	6.63727e-06	726	1.63263e-05	1545	-0.0324401	147	-1.51414	579	1.70018e-09	1046	-1.64779e-07	1032	-0.000388691	1032	-0.000388691
MTF1	891	0.984907	266	0.112304	867	0.93108	376	3.17588e-05	1545	-9.47103e-05	257	-0.0244213	394	-2.42494	1428	-6.45861e-06	1369	-5.67726e-06	1350	-0.00283549	1350	-0.00283549
NFIB	893	0.988813	977	1	361	0.0794718	1815	-0.00104274	1828	-0.00167464	585	-0.0284618	1001	-3.51184	181	5.74667e-05	233	1.55933e-05	1477	-0.00454456	1477	-0.00454456
UBE2I	894	0.991301	503	0.405224	913	1	1099	-1.80864e-06	928	2.44047e-06	957	-0.0304111	269	-2.04746	1019	-4.16381e-08	966	-2.59631e-08	1229	-0.00159917	1229	-0.00159917
SOX4	894	0.991301	977	1	913	1	1272	-8.23039e-06	1460	-3.94579e-05	568	-0.0283743	1546	-4.55674	1063	-9.62521e-08	1121	-4.20677e-07	638	0.00122582	638	0.00122582
PREB	896	0.993319	456	0.349372	913	1	874	0	1004	0	427	-0.0270736	434	-2.53205	591	0	556	0	847	3.7379e-32	847	3.7379e-32
CBX2	897	0.993436	393	0.273009	913	1	1928	-0.0070765	1895	-0.00500976	125	-0.0201619	225	-1.89563	1918	-0.000900844	1930	-0.00140532	1175	-0.00124369	1175	-0.00124369
ZMAT5	898	0.996435	201	0.0660126	913	1	50	0.00105011	106	0.00267517	703	-0.0292564	791	-3.16782	1510	-1.41291e-05	1520	-1.9259e-05	1586	-0.00673237	1586	-0.00673237
ING5	899	1	977	1	569	0.435114	859	9.21913e-08	1303	-8.25308e-06	1463	-0.032182	887	-3.34517	591	0	556	0	299	0.00660771	299	0.00660771
MATR3	899	1	977	1	652	0.586808	1058	-1.05061e-06	800	8.78077e-06	1485	-0.0322328	1503	-4.44667	591	0	556	0	328	0.00601122	328	0.00601122
CEBPG	899	1	977	1	619	0.538051	663	5.48296e-06	1239	-3.83265e-06	1425	-0.0320661	1542	-4.54979	591	0	556	0	372	0.00485259	372	0.00485259
ZNF195	899	1	977	1	868	0.938667	1023	-5.58192e-07	1272	-6.2693e-06	1385	-0.0319111	519	-2.69573	591	0	556	0	376	0.00480293	376	0.00480293
ZNF37A	899	1	977	1	913	1	721	3.0648e-06	1176	-1.99771e-06	1663	-0.0329409	784	-3.16276	591	0	556	0	380	0.00466224	380	0.00466224
CPSF4	899	1	977	1	629	0.558181	776	1.53426e-06	1267	-6.13001e-06	859	-0.030031	1687	-4.97857	591	0	556	0	411	0.00413211	411	0.00413211
NAB2	899	1	977	1	906	0.986991	1010	-3.64304e-07	850	6.03158e-06	1612	-0.0327203	856	-3.29596	591	0	556	0	433	0.00381776	433	0.00381776
ZXDB	899	1	973	0.994666	913	1	747	2.09442e-06	887	4.05119e-06	592	-0.0284979	1853	-6.29482	591	0	556	0	459	0.00340427	459	0.00340427
SMC2	899	1	977	1	913	1	1055	-1.02989e-06	973	6.85564e-07	1534	-0.032399	680	-2.99146	591	0	556	0	461	0.00337209	461	0.00337209
SMAD2	899	1	977	1	913	1	1056	-1.03798e-06	853	5.73767e-06	1892	-0.0362703	1241	-3.91656	591	0	556	0	468	0.00331805	468	0.00331805
SP5	899	1	977	1	913	1	1211	-5.64731e-06	1118	-2.45946e-07	1828	-0.0341188	1467	-4.34527	591	0	556	0	472	0.00329276	472	0.00329276
FEZF1	899	1	977	1	686	0.646449	626	7.02787e-06	1444	-3.55261e-05	1917	-0.0383209	1043	-3.56787	591	0	556	0	514	0.00261662	514	0.00261662
MED9	899	1	585	0.494347	866	0.931015	988	-1.78419e-07	1155	-1.16174e-06	572	-0.0284053	1085	-3.6409	591	0	556	0	529	0.00242669	529	0.00242669
POLRMT	899	1	961	0.984284	913	1	1372	-1.81599e-05	1338	-1.10183e-05	475	-0.0276272	570	-2.7936	591	0	556	0	532	0.0023552	532	0.0023552
ZNF761	899	1	977	1	913	1	1029	-6.16623e-07	807	8.63442e-06	734	-0.0294008	1844	-6.20514	591	0	556	0	536	0.00233754	536	0.00233754
KMT2D	899	1	977	1	831	0.873069	754	1.9778e-06	1158	-1.24501e-06	749	-0.0295047	1734	-5.19711	591	0	556	0	542	0.00225339	542	0.00225339
PKNOX1	899	1	923	0.933639	913	1	1354	-1.51421e-05	772	1.17242e-05	776	-0.0296514	1116	-3.69504	591	0	556	0	547	0.0022048	547	0.0022048
MTA1	899	1	977	1	888	0.962778	1003	-2.74981e-07	878	4.4994e-06	1899	-0.0366956	1668	-4.89914	591	0	556	0	556	0.00204124	556	0.00204124
ZSCAN21	899	1	977	1	913	1	723	3.0232e-06	1225	-3.36175e-06	1544	-0.032435	456	-2.57609	591	0	556	0	568	0.0019808	568	0.0019808
SREBF1	899	1	977	1	913	1	1120	-2.42298e-06	1106	-2.89038e-08	1535	-0.0324006	158	-1.56833	591	0	556	0	573	0.00195793	573	0.00195793
GTF3A	899	1	745	0.706834	705	0.685286	1126	-2.57303e-06	914	2.92209e-06	1263	-0.0315665	768	-3.14116	591	0	556	0	576	0.00189725	576	0.00189725
IRF5	899	1	977	1	808	0.835611	762	1.84157e-06	988	3.93051e-07	1893	-0.0363217	413	-2.46736	591	0	556	0	605	0.00164448	605	0.00164448
KHSRP	899	1	977	1	828	0.861733	1077	-1.36657e-06	1464	-4.06629e-05	188	-0.0228524	1204	-3.85681	591	0	556	0	607	0.00160917	607	0.00160917
ZNF148	899	1	977	1	913	1	1293	-1.01027e-05	942	1.59976e-06	371	-0.0264713	1611	-4.75388	591	0	556	0	615	0.0014841	615	0.0014841
INTS5	899	1	977	1	805	0.831917	571	1.03366e-05	1290	-7.0823e-06	1927	-0.0391533	1740	-5.20877	591	0	556	0	644	0.00109999	644	0.00109999
ISL2	899	1	977	1	818	0.84675	1252	-7.52676e-06	1193	-2.49489e-06	1822	-0.0340831	1646	-4.83614	591	0	556	0	666	0.00083356	666	0.00083356
E2F8	899	1	733	0.689095	755	0.763521	1184	-4.38711e-06	1255	-5.0684e-06	1098	-0.0309622	1063	-3.60476	591	0	556	0	699	0.000571208	699	0.000571208
CDX1	899	1	977	1	764	0.774094	1011	-3.88327e-07	852	5.75062e-06	1814	-0.0340011	769	-3.14459	591	0	556	0	702	0.000552668	702	0.000552668
CHD3	899	1	977	1	783	0.802704	609	8.04729e-06	1425	-2.90719e-05	1190	-0.0313402	1327	-4.08363	591	0	556	0	710	0.000469196	710	0.000469196
ZNF253	899	1	729	0.684713	913	1	1060	-1.07406e-06	1187	-2.38388e-06	1253	-0.031533	776	-3.15317	591	0	556	0	715	0.000435413	715	0.000435413
HNF4G	899	1	977	1	801	0.828232	740	2.23531e-06	991	3.01497e-07	1380	-0.0319019	1410	-4.23485	591	0	556	0	717	0.000423465	717	0.000423465
SNAPC1	899	1	977	1	913	1	625	7.05994e-06	1381	-1.60367e-05	1683	-0.0330637	165	-1.61776	591	0	556	0	718	0.000414391	718	0.000414391
AICDA	899	1	977	1	808	0.835611	558	1.11663e-05	949	1.40652e-06	1745	-0.0334113	403	-2.44881	591	0	556	0	719	0.000397629	719	0.000397629
ARID3B	899	1	977	1	815	0.843027	1068	-1.18827e-06	1266	-6.03051e-06	1815	-0.0340075	885	-3.34114	591	0	556	0	721	0.00037613	721	0.00037613
ZNF211	899	1	977	1	913	1	977	-9.76076e-08	962	9.09543e-07	1518	-0.0323479	988	-3.48258	591	0	556	0	726	0.000322035	726	0.000322035
PPP2R1A	899	1	977	1	913	1	1279	-8.83621e-06	1433	-3.10345e-05	1403	-0.0319673	929	-3.40432	591	0	556	0	730	0.000284058	730	0.000284058
NCOA6	899	1	977	1	911	0.999222	851	1.748e-07	952	1.37115e-06	1327	-0.0317557	1631	-4.80149	591	0	556	0	733	0.000265837	733	0.000265837
UBE3A	899	1	949	0.970015	913	1	1280	-8.90411e-06	926	2.47436e-06	1367	-0.0318641	270	-2.06241	591	0	556	0	734	0.000258729	734	0.000258729
REPIN1	899	1	977	1	913	1	975	-8.48346e-08	1166	-1.57573e-06	773	-0.0296153	1806	-5.78276	591	0	556	0	738	0.00023558	738	0.00023558
ZNF518B	899	1	732	0.686901	913	1	1254	-7.57448e-06	1231	-3.55788e-06	658	-0.0289833	141	-1.46505	591	0	556	0	740	0.000227601	740	0.000227601
CSDC2	899	1	590	0.502963	878	0.950797	1111	-2.18905e-06	1160	-1.27289e-06	481	-0.0277242	146	-1.50604	591	0	556	0	749	0.000160336	749	0.000160336
HSP90B1	899	1	977	1	883	0.954781	838	3.1802e-07	1279	-6.60889e-06	1212	-0.0314031	1465	-4.34264	591	0	556	0	750	0.000160048	750	0.000160048
DRAP1	899	1	977	1	886	0.958775	766	1.69924e-06	1152	-1.12742e-06	902	-0.0301937	1520	-4.50433	591	0	556	0	751	0.000153309	751	0.000153309
SET	899	1	977	1	913	1	770	1.64804e-06	998	7.60157e-08	1453	-0.0321665	1345	-4.12071	591	0	556	0	752	0.000151397	752	0.000151397
WRN	899	1	977	1	913	1	1133	-2.84382e-06	731	1.55128e-05	1833	-0.0341839	230	-1.91708	591	0	556	0	753	0.000150997	753	0.000150997
TFB2M	899	1	977	1	913	1	829	4.87345e-07	1129	-5.31268e-07	1819	-0.0340518	677	-2.99009	591	0	556	0	755	0.000146337	755	0.000146337
BCL9	899	1	977	1	896	0.978883	995	-2.1473e-07	1162	-1.3938e-06	1456	-0.0321699	1113	-3.68935	591	0	556	0	756	0.000138213	756	0.000138213
ZZZ3	899	1	538	0.440226	913	1	874	0	1004	0	618	-0.0287432	1122	-3.70788	591	0	556	0	757	0.000137321	757	0.000137321
CDK6	899	1	977	1	908	0.991058	1157	-3.64251e-06	1227	-3.47646e-06	1115	-0.0310393	1471	-4.35173	591	0	556	0	759	0.000118208	759	0.000118208
ZNF326	899	1	977	1	913	1	758	1.90861e-06	1276	-6.40714e-06	1565	-0.0325234	472	-2.60799	591	0	556	0	761	0.000109514	761	0.000109514
ELF2	899	1	727	0.68253	913	1	1195	-4.81891e-06	934	1.93564e-06	402	-0.0267644	1252	-3.94326	591	0	556	0	766	9.66561e-05	766	9.66561e-05
BHLHE41	899	1	977	1	913	1	604	8.25227e-06	1133	-6.29653e-07	1778	-0.0337376	1124	-3.71098	591	0	556	0	768	9.32604e-05	768	9.32604e-05
H1t	899	1	742	0.704598	913	1	704	3.64912e-06	814	8.16106e-06	1262	-0.0315619	567	-2.78958	591	0	556	0	771	6.98487e-05	771	6.98487e-05
MAF1	899	1	977	1	913	1	499	1.5511e-05	1002	1.47741e-08	403	-0.0267723	1587	-4.68126	591	0	556	0	772	6.76362e-05	772	6.76362e-05
ARID3A	899	1	977	1	913	1	853	1.61012e-07	967	8.60381e-07	1880	-0.0355383	231	-1.91759	591	0	556	0	775	6.4612e-05	775	6.4612e-05
BARX1	899	1	977	1	913	1	1059	-1.05777e-06	783	1.09527e-05	1924	-0.0389345	1944	-11.3667	591	0	556	0	776	6.39942e-05	776	6.39942e-05
BMI	899	1	977	1	913	1	870	3.60896e-08	1141	-8.44933e-07	1661	-0.0329384	882	-3.33878	591	0	556	0	777	6.21131e-05	777	6.21131e-05
ZNF662	899	1	977	1	913	1	678	4.85962e-06	1126	-4.53297e-07	1926	-0.0390685	1789	-5.61412	591	0	556	0	778	6.07e-05	778	6.07e-05
ZNF891	899	1	618	0.540386	913	1	1181	-4.3284e-06	1134	-6.3745e-07	720	-0.0293441	1106	-3.67185	591	0	556	0	780	4.89965e-05	780	4.89965e-05
AIM2	899	1	977	1	913	1	874	0	1004	0	1696	-0.0331329	1144	-3.7399	591	0	556	0	783	3.61041e-05	783	3.61041e-05
MLX	899	1	593	0.5047	913	1	651	6.03065e-06	1161	-1.31645e-06	845	-0.0299746	905	-3.37187	591	0	556	0	784	3.4795e-05	784	3.4795e-05
RERE	899	1	855	0.853603	913	1	1255	-7.73029e-06	1324	-9.63681e-06	868	-0.030065	451	-2.56742	591	0	556	0	785	3.35445e-05	785	3.35445e-05
MEIS1	899	1	977	1	913	1	1132	-2.8384e-06	931	2.1245e-06	1557	-0.0324864	232	-1.91843	591	0	556	0	786	3.27431e-05	786	3.27431e-05
NFRKB	899	1	944	0.961539	913	1	565	1.08522e-05	875	4.56321e-06	698	-0.0292396	1805	-5.77976	591	0	556	0	788	2.7171e-05	788	2.7171e-05
ZNF547	899	1	357	0.232927	913	1	585	9.51598e-06	1116	-2.19332e-07	1890	-0.0359509	29	4.51097	591	0	556	0	789	2.41094e-05	789	2.41094e-05
NR2C1	899	1	977	1	913	1	1368	-1.75709e-05	1214	-3.07717e-06	525	-0.0281053	1904	-7.49382	591	0	556	0	792	2.17639e-05	792	2.17639e-05
ZSCAN16	899	1	977	1	913	1	1001	-2.68975e-07	785	1.03358e-05	1694	-0.0331252	1898	-7.22386	591	0	556	0	793	1.89403e-05	793	1.89403e-05
MXD3	899	1	977	1	913	1	982	-1.29699e-07	1001	2.94174e-08	1516	-0.0323434	1338	-4.1002	591	0	556	0	794	1.5287e-05	794	1.5287e-05
NOS2	899	1	648	0.579859	913	1	855	1.4649e-07	1202	-2.735e-06	295	-0.025097	1140	-3.73676	591	0	556	0	795	1.41688e-05	795	1.41688e-05
ID1	899	1	977	1	913	1	716	3.21495e-06	1000	5.57358e-08	1388	-0.0319134	558	-2.76754	591	0	556	0	796	1.33859e-05	796	1.33859e-05
ESRRB	899	1	977	1	913	1	1064	-1.15479e-06	1224	-3.33499e-06	1471	-0.0321991	478	-2.61708	591	0	556	0	798	1.11102e-05	798	1.11102e-05
H2B	899	1	977	1	913	1	874	0	1004	0	1691	-0.0331059	1088	-3.64549	591	0	556	0	804	3.009e-07	804	3.009e-07
ISL1	899	1	977	1	913	1	874	0	1004	0	1934	-0.040671	1564	-4.61349	591	0	556	0	805	2.66122e-07	805	2.66122e-07
SVIL	899	1	652	0.583727	913	1	874	0	1004	0	1204	-0.0313859	1173	-3.79938	591	0	556	0	806	2.21127e-07	806	2.21127e-07
ZNF623	899	1	977	1	913	1	874	0	1004	0	1729	-0.033318	1706	-5.08178	591	0	556	0	807	1.95546e-07	807	1.95546e-07
ARHGAP35	899	1	660	0.597421	913	1	871	8.98744e-09	1112	-9.09099e-08	1211	-0.0314024	1111	-3.68064	591	0	556	0	808	1.76803e-07	808	1.76803e-07
CCNE1	899	1	816	0.790935	913	1	863	8.27518e-08	1299	-7.95632e-06	821	-0.0298681	1242	-3.91688	591	0	556	0	809	1.69338e-07	809	1.69338e-07
HMGN2	899	1	977	1	913	1	874	0	1004	0	866	-0.0300573	1702	-5.06578	591	0	556	0	810	1.6503e-07	810	1.6503e-07
H3K36me1	899	1	423	0.30902	913	1	874	0	1004	0	424	-0.0270189	739	-3.08644	591	0	556	0	811	1.589e-07	811	1.589e-07
STAT5	899	1	977	1	913	1	874	0	1004	0	1848	-0.0344154	336	-2.25854	591	0	556	0	812	4.7773e-08	812	4.7773e-08
NRIP1	899	1	977	1	913	1	860	9.16414e-08	1145	-9.29294e-07	1717	-0.0332573	765	-3.13362	591	0	556	0	813	3.42119e-08	813	3.42119e-08
HOXD9	899	1	977	1	913	1	1000	-2.68907e-07	1114	-1.71829e-07	1620	-0.0327625	315	-2.20877	591	0	556	0	814	3.3627e-08	814	3.3627e-08
SPIN1	899	1	864	0.863966	913	1	727	2.98123e-06	1229	-3.51494e-06	770	-0.0295959	1328	-4.08478	591	0	556	0	815	2.14246e-08	815	2.14246e-08
ZSCAN9	899	1	977	1	913	1	874	0	1004	0	1854	-0.0344968	1301	-4.02484	591	0	556	0	816	4.88559e-09	816	4.88559e-09
ZNF451	899	1	489	0.387813	913	1	874	0	1004	0	1050	-0.0308066	787	-3.16378	591	0	556	0	817	4.19772e-09	817	4.19772e-09
LIN9	899	1	977	1	913	1	790	1.09614e-06	1313	-8.96001e-06	1637	-0.0328383	1451	-4.30866	591	0	556	0	818	3.80967e-09	818	3.80967e-09
CBX4	899	1	977	1	913	1	874	0	1004	0	1148	-0.0311731	1746	-5.25082	591	0	556	0	819	2.76853e-09	819	2.76853e-09
CBX6	899	1	582	0.490932	913	1	1114	-2.27902e-06	968	8.33268e-07	1095	-0.0309498	1153	-3.75236	591	0	556	0	821	2.49206e-09	821	2.49206e-09
ZNF782	899	1	977	1	913	1	874	0	1004	0	1783	-0.0337793	809	-3.21222	591	0	556	0	822	1.50756e-09	822	1.50756e-09
IKZF3	899	1	977	1	913	1	874	0	1004	0	1596	-0.0326445	706	-3.0316	591	0	556	0	823	6.51681e-10	823	6.51681e-10
ZNF491	899	1	977	1	913	1	874	0	1004	0	1561	-0.0324997	1446	-4.30473	591	0	556	0	824	6.42735e-10	824	6.42735e-10
ZFP37	899	1	770	0.736388	913	1	874	0	1004	0	929	-0.0303059	1276	-3.99202	591	0	556	0	826	1.37012e-11	826	1.37012e-11
PTBP1	899	1	977	1	913	1	983	-1.34938e-07	970	7.60185e-07	1451	-0.0321663	312	-2.19576	591	0	556	0	827	5.31613e-12	827	5.31613e-12
MGEA5	899	1	977	1	913	1	874	0	1004	0	1668	-0.0329692	1483	-4.38724	591	0	556	0	828	3.38173e-12	828	3.38173e-12
RPA2	899	1	577	0.487535	913	1	874	0	1004	0	1151	-0.0311886	1032	-3.55177	591	0	556	0	829	3.15057e-12	829	3.15057e-12
MED22	899	1	977	1	913	1	874	0	1004	0	1861	-0.0346833	306	-2.18353	591	0	556	0	830	2.64144e-12	830	2.64144e-12
IRX5	899	1	434	0.321232	913	1	874	0	1004	0	557	-0.0282964	559	-2.77085	591	0	556	0	831	1.33411e-12	831	1.33411e-12
HOXD4	899	1	977	1	913	1	874	0	1004	0	1588	-0.0326073	1047	-3.5792	591	0	556	0	833	1.94097e-24	833	1.94097e-24
SETX	899	1	908	0.906361	913	1	874	0	1004	0	1344	-0.0318084	1225	-3.9001	591	0	556	0	834	1.54414e-24	834	1.54414e-24
DTL	899	1	977	1	913	1	874	0	1004	0	497	-0.0278463	1716	-5.12044	591	0	556	0	835	8.53669e-25	835	8.53669e-25
HOXB2	899	1	977	1	913	1	874	0	1004	0	1795	-0.0338783	422	-2.49469	591	0	556	0	836	2.8175e-25	836	2.8175e-25
PHF2	899	1	977	1	913	1	874	0	1004	0	1532	-0.0323953	625	-2.90626	591	0	556	0	837	1.97011e-25	837	1.97011e-25
NKX2-8	899	1	607	0.520532	913	1	849	2.14966e-07	1107	-3.32486e-08	864	-0.0300518	1170	-3.79654	591	0	556	0	838	1.31907e-25	838	1.31907e-25
RNF20	899	1	546	0.449718	913	1	874	0	1004	0	1128	-0.0310841	224	-1.89407	591	0	556	0	839	7.26768e-26	839	7.26768e-26
CDX4	899	1	977	1	913	1	854	1.57756e-07	971	7.48677e-07	1317	-0.031732	1843	-6.19418	591	0	556	0	840	2.24311e-29	840	2.24311e-29
RDme1	899	1	837	0.825587	913	1	874	0	1004	0	1313	-0.0317145	229	-1.91617	591	0	556	0	841	1.77237e-29	841	1.77237e-29
MYH11	899	1	977	1	913	1	847	2.29998e-07	906	3.42072e-06	1527	-0.0323628	1826	-6.01104	591	0	556	0	842	8.80437e-30	842	8.80437e-30
ZNF605	899	1	953	0.972856	913	1	874	0	1004	0	1368	-0.0318641	1168	-3.78803	591	0	556	0	843	5.02473e-30	843	5.02473e-30
MED6	899	1	735	0.691294	913	1	874	0	1004	0	1256	-0.0315451	296	-2.15062	591	0	556	0	844	1.72568e-30	844	1.72568e-30
ZNF516	899	1	977	1	913	1	874	0	1004	0	1475	-0.032209	1143	-3.73878	591	0	556	0	845	7.88963e-31	845	7.88963e-31
PTRF	899	1	926	0.939167	913	1	874	0	1004	0	1356	-0.0318385	916	-3.39051	591	0	556	0	848	1.14393e-40	848	1.14393e-40
HLTF	899	1	977	1	913	1	874	0	1004	0	1630	-0.0328125	1560	-4.60304	591	0	556	0	849	5.85e-41	849	5.85e-41
ALKBH1	899	1	489	0.387813	913	1	874	0	1004	0	1087	-0.0309261	742	-3.09269	591	0	556	0	850	4.29139e-41	850	4.29139e-41
MLLT10	899	1	444	0.333804	913	1	874	0	1004	0	392	-0.0267044	411	-2.46467	591	0	556	0	851	2.92845e-41	851	2.92845e-41
NFIA	899	1	977	1	913	1	874	0	1004	0	1864	-0.0348011	1237	-3.9155	591	0	556	0	852	2.81368e-41	852	2.81368e-41
ELANE	899	1	829	0.80565	913	1	874	0	1004	0	1305	-0.0316625	294	-2.14517	591	0	556	0	853	2.61957e-41	853	2.61957e-41
ZNF786	899	1	977	1	913	1	874	0	1004	0	632	-0.0288329	1861	-6.37785	591	0	556	0	854	2.32967e-41	854	2.32967e-41
PGBD5	899	1	977	1	913	1	874	0	1004	0	1853	-0.0344696	948	-3.43517	591	0	556	0	855	2.2848e-41	855	2.2848e-41
ZBTB7B	899	1	977	1	913	1	874	0	1004	0	1179	-0.0313002	1818	-5.93404	591	0	556	0	856	1.65603e-41	856	1.65603e-41
ZNF449	899	1	977	1	913	1	592	8.89174e-06	1249	-4.71516e-06	1718	-0.0332756	1780	-5.49827	591	0	556	0	857	1.48335e-41	857	1.48335e-41
ZNF302	899	1	977	1	913	1	874	0	1004	0	1774	-0.0336747	152	-1.55145	591	0	556	0	858	1.40597e-41	858	1.40597e-41
ZNF655	899	1	498	0.396447	913	1	874	0	1004	0	830	-0.0299043	709	-3.0341	591	0	556	0	859	1.39614e-41	859	1.39614e-41
PRKDC	899	1	917	0.919924	913	1	874	0	1004	0	1349	-0.031816	1223	-3.89479	591	0	556	0	861	1.03984e-41	861	1.03984e-41
TCF25	899	1	977	1	913	1	874	0	1004	0	1920	-0.0385529	176	-1.6809	591	0	556	0	862	5.27378e-42	862	5.27378e-42
LIN28B	899	1	977	1	913	1	874	0	1004	0	909	-0.0302241	1561	-4.60592	591	0	556	0	863	4.52695e-42	863	4.52695e-42
SOX8	899	1	977	1	913	1	874	0	1004	0	1510	-0.0323288	974	-3.46924	591	0	556	0	864	3.92757e-42	864	3.92757e-42
SMC4	899	1	929	0.94472	913	1	874	0	1004	0	1358	-0.0318394	1191	-3.83237	591	0	556	0	865	2.82016e-42	865	2.82016e-42
CHAMP1	899	1	409	0.293668	913	1	874	0	1004	0	483	-0.0277386	345	-2.28291	591	0	556	0	866	2.80159e-42	866	2.80159e-42
ZNF776	899	1	977	1	913	1	850	1.7777e-07	966	8.61279e-07	1422	-0.0320557	1240	-3.91605	591	0	556	0	867	2.63026e-42	867	2.63026e-42
LDB1	899	1	721	0.676011	913	1	974	-7.75929e-08	1108	-3.53968e-08	1101	-0.0309723	1249	-3.93704	591	0	556	0	868	3.72511e-43	868	3.72511e-43
GATA4	899	1	977	1	913	1	874	0	1004	0	1910	-0.0378353	1883	-6.85265	591	0	556	0	869	-1.18951e-42	869	-1.18951e-42
THAP7	899	1	977	1	913	1	874	0	1004	0	1135	-0.031104	1493	-4.41307	591	0	556	0	870	-5.65005e-42	870	-5.65005e-42
ETV2	899	1	921	0.930884	913	1	848	2.2729e-07	1278	-6.4492e-06	1353	-0.0318284	543	-2.73338	591	0	556	0	871	-6.12915e-42	871	-6.12915e-42
ZNF324	899	1	977	1	913	1	874	0	1004	0	1701	-0.0331619	1177	-3.80311	591	0	556	0	872	-6.28877e-42	872	-6.28877e-42
PPARD	899	1	977	1	913	1	874	0	1004	0	1420	-0.0320479	346	-2.28569	591	0	556	0	873	-6.40888e-42	873	-6.40888e-42
HDAC4	899	1	961	0.984284	913	1	874	0	1004	0	1196	-0.0313725	1372	-4.15475	591	0	556	0	874	-6.59836e-42	874	-6.59836e-42
ZNF17	899	1	482	0.382136	913	1	874	0	1004	0	893	-0.0301616	843	-3.27661	591	0	556	0	875	-8.78569e-42	875	-8.78569e-42
PDS5B	899	1	977	1	913	1	874	0	1004	0	1928	-0.0396176	1176	-3.80229	591	0	556	0	876	-1.02003e-41	876	-1.02003e-41
ATR	899	1	910	0.909062	913	1	874	0	1004	0	1345	-0.0318095	1256	-3.96174	591	0	556	0	877	-1.09987e-41	877	-1.09987e-41
PRAME	899	1	749	0.709075	913	1	874	0	1004	0	1264	-0.0315669	861	-3.30749	591	0	556	0	878	-1.59032e-41	878	-1.59032e-41
BCL6B	899	1	977	1	913	1	874	0	1004	0	584	-0.028461	1854	-6.29551	591	0	556	0	880	-2.01614e-41	880	-2.01614e-41
ZNF215	899	1	919	0.922655	913	1	874	0	1004	0	1350	-0.0318224	894	-3.35337	591	0	556	0	881	-2.06924e-41	881	-2.06924e-41
APOBEC3B	899	1	977	1	913	1	874	0	1004	0	551	-0.0282593	1867	-6.49714	591	0	556	0	882	-3.85372e-41	882	-3.85372e-41
H3T6ph	899	1	425	0.310225	913	1	874	0	1004	0	422	-0.0269803	896	-3.35439	591	0	556	0	883	-7.57663e-41	883	-7.57663e-41
FOXP2	899	1	977	1	913	1	1050	-9.41954e-07	1165	-1.56984e-06	1511	-0.0323308	878	-3.33709	591	0	556	0	884	-1.31665e-30	884	-1.31665e-30
CRY1	899	1	977	1	913	1	874	0	1004	0	1547	-0.0324436	1841	-6.1654	591	0	556	0	885	-2.56197e-30	885	-2.56197e-30
OSR2	899	1	977	1	913	1	1049	-9.40016e-07	1184	-2.33902e-06	793	-0.0297517	1711	-5.09477	591	0	556	0	886	-5.55526e-30	886	-5.55526e-30
TAF1C	899	1	977	1	913	1	874	0	1004	0	1851	-0.0344555	1162	-3.76973	591	0	556	0	888	-7.91401e-30	888	-7.91401e-30
FOSL2	899	1	776	0.741016	913	1	874	0	1004	0	1278	-0.0316023	163	-1.59695	591	0	556	0	890	-1.33051e-29	890	-1.33051e-29
ZSCAN20	899	1	977	1	913	1	874	0	1004	0	1738	-0.0333739	1870	-6.558	591	0	556	0	892	-2.29266e-29	892	-2.29266e-29
DPPA3	899	1	648	0.579859	913	1	874	0	1004	0	1202	-0.0313829	359	-2.33478	591	0	556	0	893	-2.33632e-29	893	-2.33632e-29
ZNF8	899	1	977	1	913	1	1035	-7.13327e-07	1203	-2.73869e-06	1599	-0.0326586	150	-1.53529	591	0	556	0	894	-1.54439e-25	894	-1.54439e-25
THAP4	899	1	977	1	913	1	874	0	1004	0	1791	-0.0338333	167	-1.63673	591	0	556	0	895	-4.75448e-25	895	-4.75448e-25
MBD3	899	1	693	0.639951	913	1	874	0	1004	0	1232	-0.0314504	1100	-3.66336	591	0	556	0	896	-8.61541e-25	896	-8.61541e-25
H1K85ac	899	1	506	0.412649	913	1	872	4.38833e-09	1104	-8.02968e-09	576	-0.0284112	754	-3.10943	591	0	556	0	897	-8.7244e-25	897	-8.7244e-25
U2AF2	899	1	766	0.731782	913	1	874	0	1004	0	1269	-0.0315757	1274	-3.98857	591	0	556	0	898	-1.65727e-24	898	-1.65727e-24
DBP	899	1	977	1	913	1	874	0	1004	0	1390	-0.0319281	1579	-4.66422	591	0	556	0	899	-4.12147e-24	899	-4.12147e-24
SP4	899	1	977	1	913	1	874	0	1004	0	1574	-0.0325691	1845	-6.22165	591	0	556	0	900	-1.7464e-13	900	-1.7464e-13
MDN1	899	1	977	1	913	1	874	0	1004	0	447	-0.0272615	1480	-4.37956	591	0	556	0	901	-3.28816e-13	901	-3.28816e-13
AHRR	899	1	977	1	913	1	874	0	1004	0	1074	-0.0308887	1630	-4.80121	591	0	556	0	902	-3.94936e-12	902	-3.94936e-12
THAP1	899	1	756	0.718094	913	1	874	0	1004	0	1268	-0.0315719	405	-2.45685	591	0	556	0	906	-9.70465e-12	906	-9.70465e-12
ZNF773	899	1	505	0.411156	913	1	874	0	1004	0	1103	-0.0309784	998	-3.50284	591	0	556	0	908	-1.29484e-10	908	-1.29484e-10
NXF1	899	1	977	1	913	1	874	0	1004	0	1665	-0.0329573	972	-3.46852	591	0	556	0	909	-6.16149e-10	909	-6.16149e-10
HOXB8	899	1	977	1	913	1	874	0	1004	0	650	-0.0289443	1877	-6.70115	591	0	556	0	910	-1.42377e-09	910	-1.42377e-09
TRMT112	899	1	768	0.734083	913	1	836	3.27972e-07	1275	-6.34351e-06	846	-0.0299768	676	-2.98877	591	0	556	0	911	-1.51985e-09	911	-1.51985e-09
FUBP3	899	1	977	1	913	1	1041	-7.98215e-07	854	5.67485e-06	1703	-0.0331787	978	-3.47595	591	0	556	0	912	-1.58226e-09	912	-1.58226e-09
FGFR1	899	1	977	1	913	1	869	4.49131e-08	993	2.44169e-07	1731	-0.0333268	1762	-5.33667	591	0	556	0	914	-7.28178e-09	914	-7.28178e-09
ZNF319	899	1	977	1	913	1	981	-1.2728e-07	1121	-2.84179e-07	183	-0.0226517	1486	-4.3937	591	0	556	0	915	-7.8262e-09	915	-7.8262e-09
HMGN3	899	1	977	1	913	1	994	-2.09968e-07	999	6.02357e-08	1859	-0.0346371	1599	-4.71655	591	0	556	0	916	-1.9565e-08	916	-1.9565e-08
DDX20	899	1	977	1	913	1	823	5.91345e-07	984	4.41662e-07	1215	-0.0314097	1533	-4.5337	591	0	556	0	917	-2.51423e-08	917	-2.51423e-08
MAP1LC3B	899	1	898	0.892949	913	1	1225	-6.35207e-06	940	1.69953e-06	1339	-0.0318011	379	-2.39604	591	0	556	0	918	-3.51418e-08	918	-3.51418e-08
PRDM15	899	1	977	1	913	1	874	0	1004	0	1737	-0.033372	164	-1.61426	591	0	556	0	919	-4.23841e-08	919	-4.23841e-08
FOXC2	899	1	977	1	913	1	874	0	1004	0	932	-0.0303122	1817	-5.9251	591	0	556	0	920	-5.52581e-08	920	-5.52581e-08
CDAN1	899	1	977	1	913	1	874	0	1004	0	1530	-0.0323704	1397	-4.20912	591	0	556	0	921	-6.19675e-08	921	-6.19675e-08
POLH	899	1	977	1	913	1	874	0	1004	0	1688	-0.0330884	1605	-4.74057	591	0	556	0	922	-6.55667e-08	922	-6.55667e-08
NFKBIZ	899	1	977	1	913	1	874	0	1004	0	1495	-0.0322606	1450	-4.30765	591	0	556	0	923	-6.71659e-08	923	-6.71659e-08
ZSCAN12	899	1	977	1	913	1	874	0	1004	0	1865	-0.0348119	1764	-5.3661	591	0	556	0	925	-9.31181e-08	925	-9.31181e-08
MED8	899	1	839	0.830629	913	1	1006	-3.06203e-07	964	8.93639e-07	903	-0.0301944	1315	-4.05595	591	0	556	0	926	-1.22014e-07	926	-1.22014e-07
CBX8	899	1	977	1	913	1	1028	-6.05017e-07	963	8.99104e-07	1755	-0.033483	1698	-5.05757	591	0	556	0	928	-1.53389e-07	928	-1.53389e-07
NAT10	899	1	577	0.487535	913	1	825	5.32132e-07	1151	-1.10475e-06	904	-0.0302021	423	-2.49475	591	0	556	0	929	-1.69483e-07	929	-1.69483e-07
LDB2	899	1	977	1	913	1	1008	-3.37954e-07	1261	-5.65058e-06	1082	-0.0309006	1491	-4.40505	591	0	556	0	930	-2.00693e-07	930	-2.00693e-07
SCMH1	899	1	711	0.660983	913	1	480	1.72565e-05	1242	-3.94104e-06	1028	-0.030723	409	-2.46432	591	0	556	0	931	-4.65398e-07	931	-4.65398e-07
YY1	899	1	977	1	913	1	1134	-2.84551e-06	896	3.90774e-06	1849	-0.0344174	1571	-4.64033	591	0	556	0	932	-5.95441e-07	932	-5.95441e-07
PTTG1	899	1	977	1	913	1	858	1.15419e-07	1111	-5.74264e-08	1602	-0.032677	484	-2.62442	591	0	556	0	933	-6.68756e-07	933	-6.68756e-07
PAX9	899	1	894	0.890284	913	1	807	8.08658e-07	995	1.7832e-07	1338	-0.031794	522	-2.698	591	0	556	0	935	-2.70774e-06	935	-2.70774e-06
TP63	899	1	977	1	913	1	874	0	1004	0	1891	-0.0361286	1404	-4.22305	591	0	556	0	938	-3.95019e-06	938	-3.95019e-06
CDK7	899	1	556	0.459363	913	1	1015	-4.97774e-07	1109	-5.21881e-08	1134	-0.0311039	161	-1.58568	591	0	556	0	940	-5.66965e-06	940	-5.66965e-06
THOC5	899	1	977	1	913	1	826	5.25929e-07	1103	-7.25212e-09	1826	-0.0341086	414	-2.46741	591	0	556	0	942	-7.03729e-06	942	-7.03729e-06
ZNF44	899	1	977	1	913	1	1207	-5.59499e-06	752	1.34405e-05	1591	-0.0326128	593	-2.83302	591	0	556	0	946	-1.06956e-05	946	-1.06956e-05
SHOX2	899	1	977	1	913	1	1042	-8.07311e-07	961	9.65789e-07	970	-0.0304543	1487	-4.39422	591	0	556	0	947	-1.12484e-05	947	-1.12484e-05
NR1H4	899	1	977	1	913	1	1039	-7.86892e-07	1226	-3.36558e-06	1781	-0.03377	1547	-4.55765	591	0	556	0	948	-1.59828e-05	948	-1.59828e-05
SMARCA1	899	1	977	1	913	1	1397	-2.28834e-05	749	1.38461e-05	1626	-0.0327851	502	-2.6595	591	0	556	0	951	-1.9532e-05	951	-1.9532e-05
ZNF503	899	1	977	1	913	1	1047	-9.33151e-07	909	3.12416e-06	1687	-0.0330835	1092	-3.65451	591	0	556	0	953	-2.64345e-05	953	-2.64345e-05
HOXB6	899	1	977	1	913	1	1141	-3.05769e-06	1269	-6.15734e-06	1754	-0.0334812	1093	-3.65618	591	0	556	0	954	-3.45787e-05	954	-3.45787e-05
ZNF570	899	1	806	0.781238	913	1	1130	-2.76799e-06	1232	-3.58046e-06	1295	-0.0316427	674	-2.98613	591	0	556	0	955	-3.79793e-05	955	-3.79793e-05
NIPBL	899	1	977	1	913	1	1190	-4.56346e-06	819	7.95982e-06	1789	-0.0338201	751	-3.10624	591	0	556	0	957	-4.58899e-05	957	-4.58899e-05
HMG20A	899	1	719	0.673849	913	1	997	-2.33368e-07	1248	-4.49819e-06	524	-0.0280897	321	-2.21966	591	0	556	0	960	-5.15985e-05	960	-5.15985e-05
NCOR2	899	1	977	1	913	1	1053	-9.8765e-07	1105	-1.61411e-08	1533	-0.0323986	1639	-4.82053	591	0	556	0	965	-7.63832e-05	965	-7.63832e-05
SRCAP	899	1	923	0.933639	913	1	862	8.80286e-08	1181	-2.21353e-06	1354	-0.0318368	971	-3.46529	591	0	556	0	966	-7.95154e-05	966	-7.95154e-05
SOX13	899	1	977	1	913	1	722	3.05556e-06	930	2.21365e-06	1616	-0.032741	1748	-5.26228	591	0	556	0	967	-7.97381e-05	967	-7.97381e-05
ZNF169	899	1	977	1	913	1	1033	-6.77627e-07	888	4.04158e-06	178	-0.0224523	1807	-5.78436	591	0	556	0	968	-7.9997e-05	968	-7.9997e-05
EN1	899	1	398	0.281047	913	1	538	1.22888e-05	1230	-3.53241e-06	408	-0.0268287	548	-2.73748	591	0	556	0	970	-9.16951e-05	970	-9.16951e-05
ZNF646	899	1	977	1	913	1	769	1.65021e-06	855	5.65853e-06	1692	-0.0331096	1108	-3.67334	591	0	556	0	971	-9.1873e-05	971	-9.1873e-05
CRTC1	899	1	977	1	913	1	839	3.1774e-07	956	1.11824e-06	1554	-0.032468	1283	-4.00182	591	0	556	0	974	-0.000102264	974	-0.000102264
ZNF16	899	1	977	1	913	1	1104	-1.95175e-06	1222	-3.23986e-06	1436	-0.0321149	1027	-3.5447	591	0	556	0	979	-0.000109822	979	-0.000109822
MYOG	899	1	977	1	913	1	1145	-3.20016e-06	1265	-5.93245e-06	1546	-0.0324425	505	-2.66433	591	0	556	0	986	-0.000155192	986	-0.000155192
NUP98	899	1	754	0.715831	913	1	784	1.29267e-06	1196	-2.56665e-06	1267	-0.0315714	127	-1.38656	591	0	556	0	987	-0.000160024	987	-0.000160024
SUPT20H	899	1	850	0.843335	913	1	772	1.63095e-06	1320	-9.33629e-06	990	-0.0305475	860	-3.30479	591	0	556	0	989	-0.00016582	989	-0.00016582
THAP9	899	1	550	0.454522	913	1	814	7.02275e-07	1131	-5.55307e-07	799	-0.0297792	1130	-3.71902	591	0	556	0	991	-0.000166254	991	-0.000166254
HOXB1	899	1	977	1	913	1	1082	-1.45986e-06	1189	-2.4175e-06	1543	-0.0324334	1068	-3.61214	591	0	556	0	995	-0.000189106	995	-0.000189106
CEBPD	899	1	675	0.619425	913	1	710	3.39188e-06	829	7.35002e-06	1222	-0.0314335	620	-2.89291	591	0	556	0	996	-0.000194898	996	-0.000194898
STAG3	899	1	977	1	913	1	803	8.64737e-07	987	4.1832e-07	1381	-0.0319025	1651	-4.84849	591	0	556	0	997	-0.00020444	997	-0.00020444
ZNF674	899	1	949	0.970015	913	1	1367	-1.74379e-05	935	1.85955e-06	384	-0.0266168	1015	-3.52564	591	0	556	0	999	-0.00020656	999	-0.00020656
NR1H2	899	1	725	0.679012	913	1	720	3.1034e-06	763	1.24259e-05	1707	-0.0332139	555	-2.75582	591	0	556	0	1006	-0.000226669	1006	-0.000226669
PAWR	899	1	870	0.871799	913	1	999	-2.65204e-07	1117	-2.28813e-07	1331	-0.0317673	1313	-4.0491	591	0	556	0	1007	-0.000232586	1007	-0.000232586
DDX39B	899	1	703	0.65462	913	1	671	5.21134e-06	1156	-1.16353e-06	1036	-0.0307447	1239	-3.91579	591	0	556	0	1011	-0.000243334	1011	-0.000243334
YY2	899	1	557	0.460986	913	1	1052	-9.72744e-07	1135	-6.52389e-07	206	-0.0232907	685	-2.99765	591	0	556	0	1013	-0.000253277	1013	-0.000253277
KAT5	899	1	977	1	913	1	1150	-3.38077e-06	917	2.81673e-06	1189	-0.0313327	1874	-6.6194	591	0	556	0	1016	-0.00026809	1016	-0.00026809
CUL4B	899	1	977	1	913	1	818	6.48737e-07	953	1.3603e-06	1821	-0.0340811	1768	-5.39563	591	0	556	0	1018	-0.00028135	1018	-0.00028135
RTF1	899	1	631	0.556701	913	1	583	9.55464e-06	707	1.96906e-05	1240	-0.0315027	466	-2.59757	591	0	556	0	1023	-0.000343496	1023	-0.000343496
ZNF337	899	1	977	1	913	1	1123	-2.54416e-06	863	5.28371e-06	1479	-0.0322262	1756	-5.30891	591	0	556	0	1033	-0.000393896	1033	-0.000393896
WRNIP1	899	1	977	1	913	1	1139	-2.98881e-06	902	3.59271e-06	1686	-0.0330767	1317	-4.05871	591	0	556	0	1034	-0.000398342	1034	-0.000398342
ZFHX4	899	1	977	1	913	1	1174	-4.12157e-06	1170	-1.71744e-06	1609	-0.0326939	1292	-4.01347	591	0	556	0	1037	-0.000424693	1037	-0.000424693
FOXS1	899	1	977	1	913	1	866	7.15257e-08	994	2.31797e-07	1237	-0.0314752	1464	-4.33786	591	0	556	0	1039	-0.000441002	1039	-0.000441002
TCEAL8	899	1	518	0.42627	913	1	581	9.5758e-06	1113	-1.56084e-07	1035	-0.0307441	363	-2.34972	591	0	556	0	1041	-0.000456098	1041	-0.000456098
PCGF3	899	1	977	1	913	1	582	9.57458e-06	1286	-6.98408e-06	1646	-0.0328776	1087	-3.6424	591	0	556	0	1045	-0.000466994	1045	-0.000466994
VCP	899	1	977	1	913	1	998	-2.6256e-07	1140	-8.03058e-07	992	-0.0305495	1400	-4.21748	591	0	556	0	1046	-0.00047952	1046	-0.00047952
ZNF652	899	1	977	1	913	1	817	6.54875e-07	837	6.62698e-06	1091	-0.030937	1738	-5.20489	591	0	556	0	1048	-0.000486498	1048	-0.000486498
FOXO4	899	1	612	0.524101	913	1	521	1.32465e-05	1172	-1.80517e-06	666	-0.0290418	990	-3.48653	591	0	556	0	1052	-0.000524558	1052	-0.000524558
ZNF3	899	1	977	1	913	1	715	3.24164e-06	1206	-2.7731e-06	1635	-0.032833	1700	-5.06204	591	0	556	0	1060	-0.000586251	1060	-0.000586251
AKNA	899	1	977	1	913	1	1140	-2.99484e-06	1285	-6.91085e-06	362	-0.0263571	1804	-5.77806	591	0	556	0	1062	-0.000587911	1062	-0.000587911
PPP2CA	899	1	310	0.17766	913	1	544	1.20505e-05	629	3.36849e-05	1882	-0.0355651	22	7.01056	591	0	556	0	1063	-0.000590723	1063	-0.000590723
ZNF552	899	1	540	0.441797	913	1	978	-1.05127e-07	1123	-3.73324e-07	887	-0.0301506	205	-1.82485	591	0	556	0	1064	-0.000591136	1064	-0.000591136
ZFP14	899	1	917	0.919924	913	1	1138	-2.87107e-06	1349	-1.18291e-05	894	-0.0301625	1023	-3.53899	591	0	556	0	1065	-0.00059505	1065	-0.00059505
ETV4	899	1	532	0.435536	913	1	530	1.26729e-05	793	9.79784e-06	722	-0.0293514	1119	-3.6993	591	0	556	0	1068	-0.000613029	1068	-0.000613029
ZSCAN31	899	1	598	0.510252	913	1	684	4.36249e-06	579	4.81121e-05	1291	-0.0316381	652	-2.94229	591	0	556	0	1069	-0.000617019	1069	-0.000617019
ZNF585B	899	1	977	1	913	1	813	7.11255e-07	1154	-1.15407e-06	1720	-0.0332783	461	-2.58911	591	0	556	0	1075	-0.000643657	1075	-0.000643657
SMN1	899	1	977	1	913	1	810	7.59847e-07	933	1.99447e-06	1431	-0.0320981	1402	-4.22014	591	0	556	0	1077	-0.000652518	1077	-0.000652518
HECTD1	899	1	977	1	913	1	685	4.34009e-06	1127	-4.5983e-07	594	-0.0285024	1415	-4.23991	591	0	556	0	1085	-0.000685677	1085	-0.000685677
ZNF410	899	1	786	0.759545	913	1	699	3.81989e-06	797	9.05923e-06	1566	-0.0325265	174	-1.66996	591	0	556	0	1090	-0.00071077	1090	-0.00071077
DROSHA	899	1	977	1	913	1	986	-1.71708e-07	1137	-6.7882e-07	1885	-0.0357488	514	-2.68583	591	0	556	0	1094	-0.000740963	1094	-0.000740963
HINFP (TFs)	899	1	977	1	913	1	973	-4.68103e-08	836	6.71927e-06	1441	-0.032141	1408	-4.23147	591	0	556	0	1095	-0.000756322	1095	-0.000756322
H3K27me2	899	1	977	1	913	1	820	6.30627e-07	1128	-4.99772e-07	1732	-0.0333344	1886	-6.98195	591	0	556	0	1097	-0.000760639	1097	-0.000760639
PCNA	899	1	326	0.198536	913	1	483	1.69763e-05	1398	-1.97339e-05	282	-0.0248508	107	-1.27985	591	0	556	0	1100	-0.00077061	1100	-0.00077061
ZNF709	899	1	977	1	913	1	1098	-1.80155e-06	920	2.64222e-06	1407	-0.0319803	549	-2.74181	591	0	556	0	1101	-0.000778967	1101	-0.000778967
RFXANK	899	1	382	0.26255	913	1	819	6.3238e-07	986	4.3196e-07	780	-0.0296725	96	-1.09824	591	0	556	0	1103	-0.000792606	1103	-0.000792606
ZNF551	899	1	977	1	913	1	1129	-2.70678e-06	972	7.3008e-07	1728	-0.0333128	1194	-3.8397	591	0	556	0	1105	-0.000798557	1105	-0.000798557
HES7	899	1	842	0.833159	913	1	873	2.50317e-09	1215	-3.11817e-06	254	-0.0242718	1316	-4.05804	591	0	556	0	1107	-0.00082429	1107	-0.00082429
ZSCAN5A	899	1	977	1	913	1	874	0	1004	0	1846	-0.0343885	538	-2.72338	591	0	556	0	1108	-0.000830065	1108	-0.000830065
KLF9	899	1	977	1	913	1	783	1.36681e-06	1136	-6.61779e-07	1753	-0.0334787	1795	-5.68008	591	0	556	0	1110	-0.000860655	1110	-0.000860655
BATF3	899	1	977	1	913	1	726	2.98835e-06	1211	-2.95485e-06	1627	-0.032798	170	-1.64431	591	0	556	0	1112	-0.000878599	1112	-0.000878599
HOXB13	899	1	772	0.738699	913	1	1277	-8.76337e-06	1250	-4.74872e-06	1173	-0.0312817	725	-3.06595	591	0	556	0	1117	-0.000890281	1117	-0.000890281
PURB	899	1	977	1	913	1	1151	-3.461e-06	849	6.11663e-06	1869	-0.0349783	1259	-3.96735	591	0	556	0	1120	-0.000902473	1120	-0.000902473
ALOX5	899	1	977	1	913	1	1192	-4.73071e-06	1405	-2.19391e-05	1760	-0.033519	1123	-3.70914	591	0	556	0	1124	-0.000928824	1124	-0.000928824
KDM4C	899	1	868	0.869182	913	1	1330	-1.36152e-05	908	3.30468e-06	645	-0.0289035	550	-2.74262	591	0	556	0	1127	-0.000937108	1127	-0.000937108
ZNF362	899	1	977	1	913	1	1084	-1.53326e-06	1182	-2.25684e-06	1271	-0.0315799	1667	-4.8961	591	0	556	0	1131	-0.000960649	1131	-0.000960649
ZNF281	899	1	977	1	913	1	1246	-7.20675e-06	981	4.60168e-07	1583	-0.0325874	1171	-3.79713	591	0	556	0	1133	-0.000973916	1133	-0.000973916
H3K31ac	899	1	418	0.305425	913	1	984	-1.52391e-07	982	4.53976e-07	1024	-0.0306937	556	-2.76059	591	0	556	0	1142	-0.00101514	1142	-0.00101514
ZNF250	899	1	977	1	913	1	506	1.41335e-05	780	1.12322e-05	1540	-0.0324229	1783	-5.51159	591	0	556	0	1146	-0.00103494	1146	-0.00103494
TCEA2	899	1	977	1	913	1	1074	-1.34993e-06	877	4.52632e-06	1408	-0.0319813	310	-2.19489	591	0	556	0	1153	-0.00109047	1153	-0.00109047
HOXC13	899	1	777	0.745666	913	1	799	9.36551e-07	1280	-6.69351e-06	276	-0.0248127	1203	-3.8549	591	0	556	0	1154	-0.00110297	1154	-0.00110297
BRD1	899	1	888	0.887626	913	1	774	1.57378e-06	1209	-2.79293e-06	1337	-0.0317903	1046	-3.57755	591	0	556	0	1155	-0.00110433	1155	-0.00110433
SAMD1	899	1	977	1	913	1	780	1.43943e-06	848	6.12415e-06	1640	-0.0328483	1492	-4.40841	591	0	556	0	1160	-0.00115146	1160	-0.00115146
YTHDC1	899	1	736	0.695708	913	1	1166	-4.01599e-06	1258	-5.50268e-06	1154	-0.0312048	690	-3.00382	591	0	556	0	1170	-0.00120598	1170	-0.00120598
KLF12	899	1	977	1	913	1	824	5.67808e-07	1257	-5.31708e-06	1938	-0.0438485	1869	-6.55495	591	0	556	0	1172	-0.00121509	1172	-0.00121509
MYRF	899	1	346	0.220593	913	1	567	1.06026e-05	699	2.01439e-05	822	-0.0298708	944	-3.42775	591	0	556	0	1177	-0.0012537	1177	-0.0012537
CHUK	899	1	920	0.928135	913	1	1283	-9.2059e-06	1352	-1.23882e-05	1228	-0.0314475	867	-3.31776	591	0	556	0	1181	-0.00129051	1181	-0.00129051
CREBL2	899	1	977	1	913	1	846	2.31484e-07	997	9.67505e-08	1876	-0.0350893	1528	-4.52618	591	0	556	0	1182	-0.00131304	1182	-0.00131304
STAT2	899	1	839	0.830629	913	1	989	-1.82024e-07	1240	-3.92441e-06	1315	-0.0317192	1077	-3.62887	591	0	556	0	1185	-0.00134154	1185	-0.00134154
ELF1	899	1	977	1	913	1	1030	-6.20856e-07	1199	-2.59056e-06	1804	-0.033919	800	-3.18533	591	0	556	0	1186	-0.00134281	1186	-0.00134281
ZNF561	899	1	724	0.678179	913	1	700	3.79943e-06	794	9.47666e-06	574	-0.0284093	1250	-3.93864	591	0	556	0	1189	-0.00138127	1189	-0.00138127
CBX7	899	1	977	1	913	1	1182	-4.36764e-06	811	8.29174e-06	1904	-0.0372245	1901	-7.34918	591	0	556	0	1193	-0.00141171	1193	-0.00141171
OVOL2	899	1	977	1	913	1	714	3.25565e-06	1180	-2.14067e-06	1424	-0.0320604	1424	-4.25857	591	0	556	0	1198	-0.00142699	1198	-0.00142699
SETD1A	899	1	679	0.623491	913	1	750	2.061e-06	810	8.31941e-06	1224	-0.0314381	303	-2.17088	591	0	556	0	1213	-0.00151063	1213	-0.00151063
NFATC2	899	1	977	1	913	1	791	1.09385e-06	809	8.34444e-06	973	-0.030485	1498	-4.43398	591	0	556	0	1220	-0.00154884	1220	-0.00154884
SRSF9	899	1	977	1	913	1	717	3.1591e-06	818	7.96865e-06	1771	-0.0336711	1287	-4.0064	591	0	556	0	1223	-0.00157912	1223	-0.00157912
ICE2	899	1	898	0.892949	913	1	1032	-6.63228e-07	980	4.65042e-07	732	-0.0293906	1339	-4.10064	591	0	556	0	1230	-0.00160542	1230	-0.00160542
H1.2	899	1	977	1	913	1	1378	-1.86773e-05	1383	-1.62303e-05	761	-0.0295722	1125	-3.71384	591	0	556	0	1240	-0.00174389	1240	-0.00174389
HOXB7	899	1	977	1	913	1	675	4.96503e-06	688	2.21797e-05	1458	-0.0321789	1462	-4.33386	591	0	556	0	1245	-0.00179198	1245	-0.00179198
PHF21A	899	1	729	0.684713	913	1	578	9.84978e-06	1253	-4.89892e-06	1058	-0.0308237	109	-1.28712	591	0	556	0	1247	-0.0018013	1247	-0.0018013
ZNF710	899	1	559	0.464153	913	1	526	1.285e-05	469	9.62575e-05	1721	-0.0332835	660	-2.9559	591	0	556	0	1251	-0.00186212	1251	-0.00186212
ZNF79	899	1	888	0.887626	913	1	1337	-1.38378e-05	845	6.20925e-06	1243	-0.0315082	1133	-3.72437	591	0	556	0	1255	-0.00188963	1255	-0.00188963
H2BS112GlcNAc	899	1	768	0.734083	913	1	1063	-1.13002e-06	691	2.18364e-05	1275	-0.0315923	933	-3.40966	591	0	556	0	1280	-0.00211099	1280	-0.00211099
pFM2	899	1	243	0.0946406	913	1	718	3.12863e-06	736	1.50366e-05	702	-0.0292542	764	-3.12959	591	0	556	0	1303	-0.00231492	1303	-0.00231492
DYRK1A	899	1	977	1	913	1	874	0	1004	0	1915	-0.0381667	453	-2.57135	591	0	556	0	1304	-0.00231745	1304	-0.00231745
H3K18la	899	1	672	0.61538	913	1	841	2.97252e-07	1220	-3.19591e-06	1169	-0.0312742	226	-1.89675	591	0	556	0	1313	-0.00241109	1313	-0.00241109
HOXD13	899	1	977	1	913	1	1124	-2.55846e-06	1268	-6.13781e-06	1702	-0.0331654	468	-2.59949	591	0	556	0	1319	-0.00246704	1319	-0.00246704
RUVBL1	899	1	961	0.984284	913	1	652	6.01179e-06	910	3.12055e-06	1372	-0.0318759	1300	-4.02383	591	0	556	0	1325	-0.00252823	1325	-0.00252823
NETO2	899	1	977	1	913	1	816	6.57322e-07	979	5.05551e-07	1800	-0.0338998	508	-2.66735	591	0	556	0	1334	-0.00260569	1334	-0.00260569
ZNF493	899	1	977	1	913	1	840	3.06827e-07	936	1.84055e-06	1946	-0.0523649	1938	-10.1711	591	0	556	0	1339	-0.00264034	1339	-0.00264034
ZNF277	899	1	977	1	913	1	992	-1.8914e-07	1238	-3.76512e-06	1379	-0.0319017	892	-3.35201	591	0	556	0	1344	-0.00274511	1344	-0.00274511
ATF7IP	899	1	977	1	913	1	1046	-8.97907e-07	1139	-7.93846e-07	1501	-0.0322924	503	-2.66113	591	0	556	0	1348	-0.00282288	1348	-0.00282288
HDAC8	899	1	521	0.427804	913	1	1103	-1.93805e-06	939	1.78149e-06	1114	-0.0310392	801	-3.18623	591	0	556	0	1353	-0.00288197	1353	-0.00288197
BACH1	899	1	977	1	913	1	669	5.24556e-06	1590	-0.000147162	1772	-0.0336732	756	-3.11339	591	0	556	0	1372	-0.00313097	1372	-0.00313097
HES1	899	1	856	0.855013	913	1	835	3.29271e-07	694	2.11145e-05	215	-0.0234368	1663	-4.88977	591	0	556	0	1393	-0.00341808	1393	-0.00341808
PCGF2	899	1	325	0.197759	913	1	811	7.57166e-07	1186	-2.3768e-06	189	-0.0228864	39	2.63023	591	0	556	0	1402	-0.00349985	1402	-0.00349985
ID4	899	1	977	1	913	1	1386	-2.00139e-05	945	1.56133e-06	1884	-0.0357301	1214	-3.87709	591	0	556	0	1405	-0.00350862	1405	-0.00350862
PARK7	899	1	977	1	913	1	1240	-6.93691e-06	1292	-7.11404e-06	1421	-0.0320536	1150	-3.74829	591	0	556	0	1409	-0.00359438	1409	-0.00359438
CHAF1A	899	1	977	1	913	1	703	3.67131e-06	1317	-9.18098e-06	1614	-0.0327289	730	-3.07428	591	0	556	0	1411	-0.00363987	1411	-0.00363987
CEBPZ	899	1	977	1	913	1	729	2.9575e-06	1295	-7.72236e-06	1786	-0.0338138	168	-1.6379	591	0	556	0	1432	-0.00388094	1432	-0.00388094
SP140L	899	1	752	0.713574	913	1	1171	-4.10581e-06	832	7.03798e-06	913	-0.0302416	1266	-3.97673	591	0	556	0	1434	-0.00390891	1434	-0.00390891
CHCHD3	899	1	977	1	913	1	767	1.69638e-06	951	1.37669e-06	1862	-0.0347048	536	-2.72234	591	0	556	0	1436	-0.00395322	1436	-0.00395322
PALB2	899	1	532	0.435536	913	1	1119	-2.41428e-06	710	1.90743e-05	817	-0.0298515	218	-1.87097	591	0	556	0	1450	-0.00413187	1450	-0.00413187
HINFP (Histone)	899	1	729	0.684713	913	1	1253	-7.54553e-06	872	4.79979e-06	855	-0.0300129	594	-2.83673	591	0	556	0	1488	-0.00487472	1488	-0.00487472
ZNF394	899	1	564	0.469783	913	1	555	1.14589e-05	663	2.66059e-05	648	-0.0289266	1559	-4.59941	591	0	556	0	1499	-0.00502822	1499	-0.00502822
FANCM	899	1	864	0.863966	913	1	1100	-1.83013e-06	1328	-1.02448e-05	842	-0.0299607	697	-3.01183	591	0	556	0	1511	-0.00526621	1511	-0.00526621
G-quadruplex	899	1	970	0.992922	913	1	856	1.39294e-07	1142	-9.05446e-07	1375	-0.0318797	575	-2.80113	591	0	556	0	1512	-0.00529041	1512	-0.00529041
RLF	899	1	977	1	913	1	1043	-8.53692e-07	946	1.51174e-06	1675	-0.0330053	1705	-5.07474	591	0	556	0	1513	-0.00529043	1513	-0.00529043
PRDM10	899	1	977	1	913	1	874	0	1004	0	1799	-0.0338979	700	-3.01884	591	0	556	0	1524	-0.00545625	1524	-0.00545625
NELFB	899	1	977	1	913	1	1005	-3.04201e-07	681	2.29054e-05	1414	-0.0320283	1460	-4.33215	591	0	556	0	1556	-0.00600294	1556	-0.00600294
ZNF2	899	1	686	0.632166	913	1	748	2.0718e-06	1241	-3.93407e-06	966	-0.0304385	82	-0.734606	591	0	556	0	1581	-0.00645979	1581	-0.00645979
ZFHX2	899	1	977	1	913	1	874	0	1004	0	730	-0.0293811	1800	-5.75681	591	0	556	0	1591	-0.00690052	1591	-0.00690052
GLTSCR1	899	1	977	1	913	1	1007	-3.08963e-07	932	2.05319e-06	1841	-0.0342898	1454	-4.31363	591	0	556	0	1612	-0.00750801	1612	-0.00750801
MAFK	899	1	977	1	913	1	1095	-1.76091e-06	1343	-1.14894e-05	1944	-0.0464172	1929	-8.71333	591	0	556	0	1623	-0.00778281	1623	-0.00778281
ZNF747	899	1	570	0.475782	913	1	1085	-1.54321e-06	916	2.87442e-06	1144	-0.0311447	960	-3.44914	591	0	556	0	1792	-0.0140159	1792	-0.0140159
GABPB2	899	1	885	0.884973	913	1	1021	-5.504e-07	974	6.51077e-07	1336	-0.0317888	870	-3.32197	588	1.36238e-10	917	-2.34083e-10	723	0.000350961	723	0.000350961
GATAD2A	899	1	494	0.392718	913	1	432	2.35998e-05	620	3.58913e-05	485	-0.0277614	1916	-7.97128	957	-9.32192e-10	913	-1.43559e-11	1437	-0.00396094	1437	-0.00396094
ZNF341	899	1	977	1	913	1	673	5.04763e-06	1305	-8.29066e-06	1817	-0.0340456	627	-2.90736	960	-1.11194e-09	538	4.1438e-09	1420	-0.00372196	1420	-0.00372196
PAX2	899	1	831	0.813084	913	1	996	-2.26584e-07	1205	-2.75871e-06	1308	-0.0316745	295	-2.14547	963	-1.8285e-09	550	8.09581e-10	1190	-0.00139538	1190	-0.00139538
TFCP2L1	899	1	977	1	913	1	1387	-2.05565e-05	938	1.8059e-06	1553	-0.0324543	238	-1.95053	990	-1.4905e-08	540	3.83549e-09	620	0.00143849	620	0.00143849
MEF2D	899	1	977	1	913	1	1179	-4.29371e-06	943	1.59893e-06	1593	-0.0326351	1894	-7.09947	953	-5.31025e-10	923	-8.00681e-10	984	-0.000140253	984	-0.000140253
DNMT3L	899	1	977	1	913	1	620	7.29916e-06	847	6.12667e-06	1526	-0.0323618	1675	-4.92894	981	-8.28686e-09	934	-3.94957e-09	1263	-0.00192039	1263	-0.00192039
H2A	899	1	977	1	913	1	697	3.90096e-06	911	3.10544e-06	1943	-0.0452299	1401	-4.21857	956	-6.31381e-10	924	-8.72727e-10	962	-5.6456e-05	962	-5.6456e-05
MINA	899	1	977	1	913	1	1204	-5.48056e-06	1434	-3.12845e-05	1830	-0.0341292	1915	-7.95652	1028	-5.21765e-08	926	-1.37613e-09	1109	-0.000845131	1109	-0.000845131
CREB3L2	899	1	602	0.51345	913	1	1153	-3.48e-06	1119	-2.55558e-07	1166	-0.0312659	656	-2.95052	959	-1.03792e-09	921	-6.6975e-10	1099	-0.000768301	1099	-0.000768301
CCAR2	899	1	629	0.553312	913	1	1188	-4.44648e-06	978	5.37795e-07	790	-0.0297451	134	-1.42195	589	1.88712e-11	552	8.11809e-12	934	-2.23791e-06	934	-2.23791e-06
MED7	899	1	590	0.502963	913	1	1160	-3.70472e-06	824	7.65468e-06	912	-0.0302298	404	-2.44922	1042	-6.47202e-08	964	-2.47443e-08	1568	-0.00624547	1568	-0.00624547
CPSF3L	899	1	977	1	913	1	1034	-6.94243e-07	922	2.63092e-06	1564	-0.0325186	642	-2.92718	995	-1.72121e-08	952	-1.35656e-08	745	0.00020958	745	0.00020958
ZNF775	899	1	977	1	913	1	1391	-2.13114e-05	831	7.05487e-06	1378	-0.031901	1284	-4.00207	961	-1.41139e-09	937	-6.133e-09	802	4.44623e-06	802	4.44623e-06
EGR2	899	1	478	0.376522	913	1	792	1.08909e-06	890	4.03805e-06	1079	-0.0308974	920	-3.39533	1076	-1.19369e-07	965	-2.5235e-08	1588	-0.00684675	1588	-0.00684675
ZNF514	899	1	755	0.716327	913	1	608	8.06094e-06	779	1.1304e-05	1440	-0.0321402	615	-2.88553	1107	-1.65005e-07	1012	-9.80822e-08	1665	-0.00869881	1665	-0.00869881
ARNT2	899	1	415	0.30068	913	1	1020	-5.44271e-07	758	1.27494e-05	561	-0.0283251	77	-0.644248	969	-4.70504e-09	941	-7.45425e-09	1149	-0.00104958	1149	-0.00104958
SNAPC2	899	1	977	1	913	1	1012	-4.10975e-07	1407	-2.24136e-05	1689	-0.033098	369	-2.36358	967	-4.23865e-09	498	5.94022e-08	1009	-0.000235821	1009	-0.000235821
RBBP4	899	1	975	0.995813	913	1	1376	-1.85076e-05	892	4.00279e-06	1089	-0.030931	1051	-3.58723	1002	-2.56978e-08	519	2.36073e-08	530	0.00242041	530	0.00242041
ZFP62	899	1	977	1	913	1	696	3.90702e-06	948	1.48485e-06	1837	-0.0342445	1387	-4.18452	586	2.77586e-10	930	-2.04871e-09	1035	-0.00040464	1035	-0.00040464
SALL4	899	1	977	1	913	1	1407	-2.37092e-05	444	0.000115092	602	-0.0286271	1830	-6.05826	1092	-1.43326e-07	998	-6.85745e-08	1365	-0.00300051	1365	-0.00300051
NUTM1	899	1	669	0.613365	913	1	1026	-5.89111e-07	919	2.64883e-06	1219	-0.0314276	1172	-3.79873	1020	-4.38191e-08	1007	-8.61681e-08	1139	-0.000985636	1139	-0.000985636
STAG1	899	1	977	1	913	1	845	2.43206e-07	791	9.87003e-06	1940	-0.0444587	1884	-6.90665	556	2.83252e-08	1190	-8.32592e-07	392	0.00440425	392	0.00440425
JADE3	899	1	977	1	913	1	1233	-6.60465e-06	1169	-1.647e-06	1780	-0.0337683	1149	-3.74592	975	-6.65025e-09	927	-1.73376e-09	728	0.00030769	728	0.00030769
SALL1	899	1	977	1	913	1	798	9.65115e-07	644	3.08599e-05	1600	-0.03266	1903	-7.47883	1012	-3.54874e-08	978	-4.23785e-08	1148	-0.00104471	1148	-0.00104471
PHF10	899	1	977	1	913	1	1305	-1.09651e-05	1350	-1.19769e-05	746	-0.0294813	1426	-4.26553	1030	-5.39986e-08	983	-4.67823e-08	1208	-0.00146799	1208	-0.00146799
BAHD1	899	1	977	1	913	1	1072	-1.22975e-06	1223	-3.28801e-06	1727	-0.0333108	317	-2.21381	978	-6.8839e-09	537	4.68438e-09	1118	-0.000891312	1118	-0.000891312
SOD1	899	1	871	0.873215	913	1	802	8.66188e-07	842	6.32383e-06	1765	-0.0335617	665	-2.96772	979	-7.76337e-09	947	-9.75945e-09	1168	-0.00118818	1168	-0.00118818
AGO1	899	1	977	1	913	1	633	6.81004e-06	654	2.90103e-05	1570	-0.0325477	1197	-3.84269	587	2.38745e-10	915	-1.23276e-10	939	-4.43469e-06	939	-4.43469e-06
ZNF587	899	1	665	0.60935	913	1	1057	-1.04724e-06	1217	-3.15681e-06	562	-0.0283442	619	-2.89205	955	-6.17836e-10	929	-1.97015e-09	724	0.000330403	724	0.000330403
SF3B1	899	1	696	0.642743	913	1	554	1.14943e-05	747	1.39145e-05	298	-0.02512	1393	-4.19459	576	6.11929e-09	539	3.96422e-09	1297	-0.00227823	1297	-0.00227823
ZNF251	899	1	961	0.984284	913	1	662	5.50292e-06	1372	-1.50151e-05	1150	-0.0311869	576	-2.80293	982	-9.66725e-09	946	-9.6751e-09	1165	-0.0011774	1165	-0.0011774
SYNCRIP	899	1	977	1	913	1	511	1.36312e-05	803	8.72514e-06	1541	-0.0324303	1354	-4.13239	1003	-2.76687e-08	973	-3.51097e-08	1209	-0.00148584	1209	-0.00148584
QKI	899	1	977	1	913	1	760	1.87653e-06	1397	-1.91916e-05	1077	-0.0308931	1336	-4.09728	1038	-6.02749e-08	979	-4.32031e-08	1648	-0.00826401	1648	-0.00826401
NR0B1	899	1	977	1	913	1	746	2.09706e-06	958	1.04786e-06	1743	-0.0333996	1311	-4.04137	951	-3.20327e-10	533	7.07473e-09	799	9.70962e-06	799	9.70962e-06
HEY1	899	1	657	0.59545	913	1	749	2.06665e-06	1210	-2.86544e-06	940	-0.0303491	1196	-3.84224	1047	-7.87767e-08	955	-1.73668e-08	1010	-0.00024001	1010	-0.00024001
NFKB2	899	1	977	1	524	0.341816	712	3.29992e-06	676	2.36136e-05	1916	-0.0382176	1761	-5.33522	549	4.98049e-08	456	1.83996e-07	345	0.00546775	345	0.00546775
ZNF843	899	1	977	1	913	1	1228	-6.48449e-06	1183	-2.26018e-06	1723	-0.0332983	908	-3.37468	574	8.09435e-09	935	-5.47001e-09	654	0.000973016	654	0.000973016
DMC1	899	1	767	0.732979	913	1	339	4.31004e-05	597	4.2498e-05	786	-0.0297189	1880	-6.81095	1004	-2.79805e-08	956	-1.78798e-08	1465	-0.00433837	1465	-0.00433837
LRIF1	899	1	691	0.638283	913	1	694	3.97694e-06	745	1.4238e-05	1481	-0.0322279	448	-2.55985	1053	-8.53337e-08	1016	-1.0622e-07	716	0.000423565	716	0.000423565
POLR3E	899	1	977	1	913	1	1173	-4.11745e-06	975	6.40873e-07	1406	-0.0319782	1246	-3.93214	1069	-1.08732e-07	1036	-1.4546e-07	1352	-0.00287817	1352	-0.00287817
ZNF490	899	1	885	0.884973	913	1	1197	-4.84719e-06	1336	-1.0869e-05	646	-0.0289103	248	-1.98625	580	1.63724e-09	928	-1.96264e-09	742	0.000221792	742	0.000221792
ZNF248	899	1	259	0.107869	913	1	1221	-6.1736e-06	1125	-4.26182e-07	137	-0.0209794	47	1.33305	952	-3.64149e-10	916	-1.82614e-10	993	-0.00017895	993	-0.00017895
N6AMT1	899	1	977	1	913	1	1038	-7.5677e-07	610	3.75242e-05	1763	-0.0335443	1291	-4.01339	1026	-5.20313e-08	967	-3.09417e-08	1241	-0.00174693	1241	-0.00174693
METTL3	899	1	634	0.562686	913	1	395	2.84206e-05	1144	-9.22789e-07	1193	-0.0313584	157	-1.56401	974	-6.57294e-09	931	-2.29643e-09	1106	-0.000816674	1106	-0.000816674
ZNF382	899	1	977	1	913	1	1106	-1.96432e-06	812	8.24685e-06	1825	-0.0341039	1524	-4.5198	1022	-4.72648e-08	972	-3.26108e-08	1406	-0.00352292	1406	-0.00352292
SMAD3	899	1	977	1	913	1	1101	-1.85312e-06	817	7.98653e-06	1690	-0.0331051	1683	-4.96404	977	-6.86357e-09	948	-1.26764e-08	1340	-0.00265828	1340	-0.00265828
ZNF571	899	1	977	1	913	1	1239	-6.88552e-06	894	3.92803e-06	1205	-0.0313933	1589	-4.68834	1081	-1.25581e-07	1061	-1.84841e-07	1212	-0.00150733	1212	-0.00150733
ZNF117	899	1	977	1	551	0.388537	1217	-5.94975e-06	976	5.92047e-07	1719	-0.033276	1044	-3.57425	570	1.18122e-08	526	1.38396e-08	481	0.00317531	481	0.00317531
H2BK120ub1	899	1	977	1	913	1	771	1.64451e-06	944	1.58841e-06	642	-0.0288994	1743	-5.24295	947	-1.53535e-13	553	2.80275e-12	913	-5.5888e-09	913	-5.5888e-09
MEOX2	899	1	977	1	913	1	844	2.43302e-07	1153	-1.14861e-06	1341	-0.0318043	1726	-5.15302	590	1.34403e-14	554	8.56873e-13	927	-1.52271e-07	927	-1.52271e-07
ZKSCAN3	899	1	811	0.786075	913	1	549	1.16612e-05	1297	-7.87517e-06	890	-0.0301548	420	-2.48531	965	-3.28288e-09	919	-3.38846e-10	1171	-0.00121345	1171	-0.00121345
H1B	899	1	977	1	913	1	761	1.85878e-06	1251	-4.78593e-06	1376	-0.0318879	1656	-4.87251	1058	-9.22922e-08	945	-9.42889e-09	1202	-0.00143684	1202	-0.00143684
ZBTB10	899	1	617	0.534916	913	1	831	4.56092e-07	1178	-2.10798e-06	837	-0.029946	580	-2.80855	1087	-1.37664e-07	1001	-7.53878e-08	1144	-0.00102834	1144	-0.00102834
ZFP41	899	1	977	1	913	1	1091	-1.73334e-06	1246	-4.34095e-06	1911	-0.037839	1763	-5.34792	994	-1.67221e-08	962	-2.04962e-08	1243	-0.00177455	1243	-0.00177455
POU2AF1	899	1	977	1	913	1	775	1.53776e-06	1122	-3.43004e-07	1629	-0.0328038	477	-2.61364	954	-5.8247e-10	920	-4.72979e-10	950	-1.76587e-05	950	-1.76587e-05
TERF1	899	1	667	0.611872	913	1	434	2.35667e-05	733	1.5488e-05	338	-0.025855	1308	-4.03863	992	-1.54039e-08	536	4.69455e-09	949	-1.73662e-05	949	-1.73662e-05
ZNF221	899	1	977	1	913	1	689	4.26159e-06	1175	-1.98242e-06	1677	-0.0330088	240	-1.95106	1075	-1.16569e-07	1052	-1.74416e-07	1688	-0.00942152	1688	-0.00942152
LHX4	899	1	977	1	913	1	979	-1.09627e-07	1271	-6.1895e-06	1742	-0.0333976	1691	-5.01509	1007	-3.01613e-08	960	-2.01288e-08	1214	-0.0015113	1214	-0.0015113
SNRNP70	899	1	822	0.800722	913	1	1163	-3.89615e-06	1283	-6.81729e-06	708	-0.0292746	1303	-4.02508	1096	-1.46286e-07	496	6.40858e-08	714	0.000441974	714	0.000441974
BRWD1	899	1	977	1	913	1	1209	-5.61689e-06	1124	-3.99386e-07	1617	-0.0327556	1434	-4.28436	585	3.29479e-10	542	2.9435e-09	944	-1.02882e-05	944	-1.02882e-05
ZNF350	899	1	977	1	913	1	852	1.66947e-07	989	3.52579e-07	637	-0.0288727	1720	-5.13125	1031	-5.52314e-08	1065	-1.91456e-07	1540	-0.00569526	1540	-0.00569526
MED26	899	1	977	1	913	1	570	1.038e-05	1435	-3.15227e-05	1470	-0.032199	1635	-4.81595	1126	-2.21949e-07	1009	-9.15263e-08	1695	-0.00956296	1695	-0.00956296
FXR1	899	1	977	1	767	0.784752	857	1.34245e-07	977	5.75154e-07	704	-0.0292578	1544	-4.55535	565	1.54851e-08	532	8.07431e-09	705	0.000536796	705	0.000536796
PSMB5	899	1	977	1	913	1	1076	-1.36641e-06	841	6.39691e-06	1827	-0.0341179	1578	-4.66031	968	-4.66828e-09	938	-6.70699e-09	1128	-0.000937115	1128	-0.000937115
MED21	899	1	353	0.228167	913	1	667	5.36854e-06	881	4.34938e-06	952	-0.0303937	509	-2.66944	996	-1.76976e-08	925	-1.04963e-09	1188	-0.00136878	1188	-0.00136878
ZNF532	899	1	977	1	913	1	827	5.0767e-07	1219	-3.17662e-06	1513	-0.0323324	1448	-4.30575	948	-2.97635e-13	555	7.61202e-13	924	-8.35058e-08	924	-8.35058e-08
MBD3L2	899	1	680	0.625531	913	1	709	3.50542e-06	937	1.82508e-06	1225	-0.031439	115	-1.31773	946	-3.39218e-15	911	-2.3793e-15	907	-1.11181e-11	907	-1.11181e-11
SIX4	899	1	977	1	913	1	731	2.86859e-06	918	2.70905e-06	1750	-0.0334548	669	-2.97556	1048	-8.0611e-08	386	9.99463e-07	1732	-0.0111017	1732	-0.0111017
FOXR2	899	1	977	1	913	1	793	1.0436e-06	1132	-5.87282e-07	1191	-0.0313421	1584	-4.67379	966	-3.72929e-09	969	-3.1162e-08	797	1.22475e-05	797	1.22475e-05
KDM4B	899	1	977	1	913	1	1048	-9.3632e-07	1298	-7.88681e-06	1608	-0.0326923	1753	-5.3007	1023	-4.84702e-08	971	-3.24612e-08	1392	-0.00338769	1392	-0.00338769
ZNF696	899	1	977	1	913	1	830	4.70964e-07	1191	-2.44748e-06	1699	-0.0331495	1473	-4.35988	1044	-7.01249e-08	1003	-8.06752e-08	735	0.00025233	735	0.00025233
NOTCH3	899	1	977	1	913	1	837	3.21456e-07	898	3.87598e-06	1185	-0.0313275	1659	-4.87898	1017	-3.8973e-08	939	-6.72917e-09	580	0.00185791	580	0.00185791
POLR2C	899	1	977	1	729	0.722079	1019	-5.37961e-07	871	4.85618e-06	1844	-0.0343327	261	-2.01556	569	1.29359e-08	520	2.06017e-08	687	0.000700084	687	0.000700084
ZNF486	899	1	977	1	913	1	1081	-1.41848e-06	851	5.92089e-06	1761	-0.0335225	849	-3.28332	1029	-5.22789e-08	995	-6.26437e-08	1302	-0.00231397	1302	-0.00231397
CSE1L	899	1	977	1	913	1	670	5.22555e-06	1316	-9.14192e-06	1664	-0.0329462	254	-1.99788	985	-1.12495e-08	943	-7.8427e-09	1079	-0.000653853	1079	-0.000653853
ZNF280A	899	1	977	1	840	0.88449	500	1.5508e-05	1110	-5.49273e-08	1249	-0.0315277	1654	-4.86907	578	2.42389e-09	549	1.31098e-09	732	0.000279406	732	0.000279406
PSMD1	899	1	977	1	913	1	1164	-3.93737e-06	1284	-6.82374e-06	1288	-0.0316307	1389	-4.18781	949	-3.59345e-11	914	-3.29283e-11	936	-3.08009e-06	936	-3.08009e-06
ZNF720	899	1	977	1	913	1	614	7.4716e-06	1252	-4.79421e-06	1735	-0.033361	1458	-4.32995	1024	-5.14393e-08	1013	-9.90621e-08	1081	-0.000661879	1081	-0.000661879
KDM5A	899	1	977	1	913	1	386	2.92357e-05	504	7.95611e-05	1902	-0.0370218	1583	-4.67377	1010	-3.34967e-08	968	-3.10655e-08	1515	-0.00529965	1515	-0.00529965
ZNF596	899	1	977	1	913	1	993	-1.91526e-07	885	4.07984e-06	1613	-0.0327225	1268	-3.97768	1040	-6.27456e-08	990	-5.74101e-08	1399	-0.00346755	1399	-0.00346755
ELK1	899	1	977	1	913	1	1096	-1.78358e-06	1355	-1.30788e-05	1712	-0.0332264	1777	-5.46137	1098	-1.48531e-07	1006	-8.56128e-08	992	-0.000177407	992	-0.000177407
CCNT1	899	1	977	1	913	1	1110	-2.17692e-06	776	1.14042e-05	1708	-0.0332175	410	-2.46457	512	1.94216e-07	1282	-2.35598e-06	388	0.00449256	388	0.00449256
PHF20	899	1	749	0.709075	913	1	1264	-8.01345e-06	1167	-1.58011e-06	1126	-0.0310784	681	-2.99302	1046	-7.25381e-08	1025	-1.19012e-07	1200	-0.0014318	1200	-0.0014318
WAPL	899	1	763	0.729487	627	0.555277	1273	-8.3923e-06	873	4.7706e-06	852	-0.0300024	1198	-3.84382	524	1.12565e-07	515	3.12936e-08	634	0.00126988	634	0.00126988
ZNF425	899	1	977	1	913	1	676	4.88883e-06	996	9.79991e-08	1752	-0.0334757	376	-2.38664	1036	-5.97391e-08	977	-4.22022e-08	416	0.00404075	416	0.00404075
ZNF707	899	1	977	1	913	1	325	4.63121e-05	636	3.25582e-05	1775	-0.0337104	1859	-6.35584	1059	-9.34902e-08	985	-4.71401e-08	1463	-0.00431869	1463	-0.00431869
SOX9	899	1	977	1	913	1	1420	-2.52237e-05	1396	-1.88835e-05	1111	-0.0310216	400	-2.44642	1162	-3.56345e-07	1087	-2.60244e-07	1880	-0.0216913	1880	-0.0216913
KSHV LANA	899	1	977	1	913	1	1044	-8.7198e-07	556	5.45414e-05	1672	-0.0329805	1865	-6.49052	1221	-7.72127e-07	1163	-6.5406e-07	1817	-0.015589	1817	-0.015589
FOS	899	1	977	1	913	1	711	3.3781e-06	870	4.86036e-06	1426	-0.0320668	1851	-6.28137	1041	-6.34694e-08	987	-5.02017e-08	393	0.00438722	393	0.00438722
HMGN4	899	1	977	1	648	0.581744	1172	-4.11562e-06	766	1.21773e-05	641	-0.0288934	1637	-4.81997	522	1.26332e-07	497	6.02222e-08	643	0.00116641	643	0.00116641
ZBTB39	899	1	977	1	913	1	789	1.18718e-06	734	1.52446e-05	1563	-0.0325127	958	-3.44737	1097	-1.46572e-07	1064	-1.87631e-07	670	0.000824383	670	0.000824383
MBD5	899	1	977	1	913	1	1433	-2.83919e-05	466	9.72512e-05	1857	-0.0345911	1715	-5.11781	1127	-2.22034e-07	1017	-1.08233e-07	1660	-0.00857084	1660	-0.00857084
CRX	899	1	977	1	913	1	701	3.79095e-06	1388	-1.75128e-05	1581	-0.0325834	1438	-4.2923	571	1.18001e-08	932	-3.05903e-09	1147	-0.00103996	1147	-0.00103996
ATF5	899	1	977	1	913	1	1177	-4.17682e-06	950	1.39833e-06	1680	-0.0330144	206	-1.82537	986	-1.1308e-08	936	-5.50909e-09	1179	-0.00127131	1179	-0.00127131
WTAP	899	1	977	1	913	1	706	3.57835e-06	1345	-1.16101e-05	1758	-0.0335051	184	-1.71761	1068	-1.07912e-07	1027	-1.20977e-07	1067	-0.000605643	1067	-0.000605643
KLF1	899	1	977	1	913	1	1154	-3.5288e-06	1260	-5.61696e-06	898	-0.0301741	1650	-4.84139	984	-1.1101e-08	922	-7.94961e-10	779	5.41778e-05	779	5.41778e-05
CPSF3	899	1	977	1	504	0.316829	1231	-6.58715e-06	1356	-1.3174e-05	1773	-0.0336733	1344	-4.11933	537	8.7436e-08	490	7.55702e-08	458	0.00341813	458	0.00341813
NELFE	899	1	977	1	913	1	1105	-1.95546e-06	672	2.40618e-05	1704	-0.0331789	298	-2.16326	1186	-4.98764e-07	1068	-2.0351e-07	1445	-0.00410443	1445	-0.00410443
EWSR1	899	1	977	1	913	1	1121	-2.42905e-06	844	6.29827e-06	1674	-0.0329878	1581	-4.66546	581	1.52662e-09	541	3.14829e-09	1082	-0.000662902	1082	-0.000662902
ZNF26	899	1	977	1	527	0.348256	1285	-9.65127e-06	1314	-8.97612e-06	1757	-0.0334977	190	-1.77062	535	9.13612e-08	462	1.66126e-07	552	0.00213825	552	0.00213825
MEF2C	899	1	977	1	798	0.822072	1080	-1.41028e-06	883	4.18875e-06	1136	-0.0311041	1840	-6.14777	1027	-5.20398e-08	982	-4.62378e-08	356	0.00523433	356	0.00523433
MIF	899	1	955	0.975704	913	1	800	9.13889e-07	867	5.04883e-06	1369	-0.0318653	1319	-4.06071	962	-1.75718e-09	544	2.65616e-09	943	-9.70597e-06	943	-9.70597e-06
SOX18	899	1	977	1	913	1	795	1.012e-06	666	2.59599e-05	1654	-0.0329005	1062	-3.60329	993	-1.56482e-08	989	-5.16554e-08	976	-0.000106481	976	-0.000106481
ZNF777	899	1	977	1	497	0.308772	1226	-6.37922e-06	1380	-1.58898e-05	1768	-0.0336366	1136	-3.72835	533	9.22408e-08	508	4.30969e-08	405	0.00421168	405	0.00421168
MSH6	899	1	573	0.482472	913	1	1147	-3.36275e-06	1148	-1.05592e-06	1032	-0.0307389	489	-2.63841	582	1.04282e-09	528	1.27491e-08	959	-5.09049e-05	959	-5.09049e-05
XRCC4	899	1	693	0.639951	913	1	985	-1.69906e-07	965	8.90045e-07	1163	-0.031243	1232	-3.91178	970	-5.36443e-09	534	6.53726e-09	1015	-0.000265338	1015	-0.000265338
AHCTF1	899	1	977	1	860	0.927086	610	8.02149e-06	897	3.89248e-06	1484	-0.0322322	1447	-4.3057	577	5.86024e-09	547	1.58196e-09	743	0.000219467	743	0.000219467
PRTN3	899	1	977	1	913	1	1087	-1.67078e-06	1311	-8.64862e-06	1724	-0.0332988	727	-3.06771	1122	-2.04192e-07	1059	-1.81154e-07	1385	-0.00333341	1385	-0.00333341
H1	899	1	977	1	913	1	741	2.22938e-06	880	4.36537e-06	1447	-0.032159	1552	-4.56702	997	-2.1244e-08	507	4.40898e-08	1634	-0.00795427	1634	-0.00795427
ZBTB7A	899	1	977	1	429	0.168601	1324	-1.29339e-05	603	4.01322e-05	1918	-0.038397	1689	-4.99912	454	7.10207e-07	404	7.71036e-07	213	0.00879021	213	0.00879021
H2AK9ac	899	1	977	1	913	1	476	1.74902e-05	782	1.11204e-05	1474	-0.0322074	1723	-5.13886	983	-1.05271e-08	1021	-1.16616e-07	658	0.00092688	658	0.00092688
DLX6	899	1	977	1	913	1	787	1.27893e-06	1410	-2.27847e-05	851	-0.0300012	1036	-3.56058	1110	-1.75037e-07	1018	-1.08979e-07	1608	-0.00734883	1608	-0.00734883
MED25	899	1	875	0.874422	913	1	1136	-2.8626e-06	1188	-2.40397e-06	1199	-0.0313791	1332	-4.0907	1015	-3.71444e-08	543	2.69804e-09	1184	-0.00133834	1184	-0.00133834
H3S28ph	899	1	788	0.759745	913	1	1086	-1.56082e-06	1237	-3.76203e-06	1218	-0.0314244	1286	-4.00631	1018	-4.09353e-08	981	-4.58851e-08	1098	-0.000766899	1098	-0.000766899
NKX3-1	899	1	977	1	913	1	535	1.23773e-05	1387	-1.69833e-05	1577	-0.0325742	1538	-4.53892	1105	-1.61972e-07	994	-6.18883e-08	493	0.00294168	493	0.00294168
HES2	899	1	563	0.467519	913	1	752	2.00239e-06	751	1.34982e-05	1139	-0.0311244	568	-2.79047	964	-2.1392e-09	951	-1.31105e-08	614	0.0014855	614	0.0014855
ZBTB40	899	1	977	1	913	1	1270	-8.14705e-06	1452	-3.70118e-05	1796	-0.0338914	257	-2.00852	1212	-7.15619e-07	1177	-7.24047e-07	1711	-0.0101849	1711	-0.0101849
BRD8	899	1	977	1	913	1	773	1.61134e-06	744	1.43384e-05	1536	-0.0324137	1210	-3.86508	1209	-7.08459e-07	1124	-4.34889e-07	1808	-0.0148285	1808	-0.0148285
ASCL2	899	1	644	0.576009	913	1	781	1.40124e-06	796	9.16887e-06	1200	-0.0313796	1126	-3.71645	1052	-8.46919e-08	1038	-1.50068e-07	1157	-0.00111199	1157	-0.00111199
ZNF33B	899	1	856	0.855013	913	1	659	5.6138e-06	835	6.75838e-06	1860	-0.0346688	671	-2.98477	1051	-8.31793e-08	1058	-1.80221e-07	667	0.000832222	667	0.000832222
NCOA4	899	1	977	1	913	1	822	6.09221e-07	1406	-2.23956e-05	1508	-0.0323265	667	-2.96986	980	-7.96083e-09	933	-3.1187e-09	1080	-0.000657057	1080	-0.000657057
OLA1	899	1	977	1	889	0.962818	1218	-5.96082e-06	625	3.47799e-05	1552	-0.0324521	980	-3.47724	1088	-1.38597e-07	474	1.17369e-07	1330	-0.00256399	1330	-0.00256399
SVS-1	899	1	977	1	913	1	779	1.47922e-06	1357	-1.32396e-05	1027	-0.0307073	1593	-4.69414	1000	-2.32116e-08	975	-3.87034e-08	1050	-0.000504439	1050	-0.000504439
H2A.X	899	1	835	0.821714	913	1	688	4.28245e-06	822	7.72133e-06	175	-0.0223927	1355	-4.13422	1021	-4.40339e-08	944	-9.06282e-09	1205	-0.00145597	1205	-0.00145597
BRCA2	899	1	977	1	913	1	1093	-1.75673e-06	941	1.60753e-06	1582	-0.0325864	337	-2.26482	987	-1.32828e-08	530	1.09652e-08	1054	-0.000546823	1054	-0.000546823
H4K5cr	899	1	977	1	913	1	453	2.11558e-05	1308	-8.41149e-06	1812	-0.0339913	506	-2.665	1124	-2.16738e-07	980	-4.38331e-08	1726	-0.0108452	1726	-0.0108452
MXI1	899	1	977	1	451	0.232145	1291	-1.00543e-05	760	1.26267e-05	1016	-0.030665	1871	-6.57176	491	3.03483e-07	426	4.13057e-07	277	0.00712279	277	0.00712279
H3K14me3	899	1	977	1	913	1	657	5.77342e-06	1392	-1.82724e-05	1896	-0.0364348	1779	-5.48168	1033	-5.69892e-08	976	-4.16169e-08	1019	-0.000297938	1019	-0.000297938
ZNF366	899	1	977	1	854	0.91554	619	7.33944e-06	1213	-3.06001e-06	1603	-0.0326785	1833	-6.07746	1043	-6.72283e-08	1039	-1.51853e-07	1309	-0.00235806	1309	-0.00235806
DDX55	899	1	816	0.790935	742	0.735742	695	3.91733e-06	1150	-1.07979e-06	596	-0.0285743	1299	-4.02279	548	5.40214e-08	517	2.71244e-08	691	0.000666906	691	0.000666906
GUCY1B3	899	1	977	1	913	1	1320	-1.24621e-05	947	1.48817e-06	1396	-0.0319445	324	-2.22282	1061	-9.45581e-08	1008	-8.89047e-08	1211	-0.00149658	1211	-0.00149658
NEDD4	899	1	977	1	897	0.979022	1167	-4.02578e-06	684	2.24953e-05	690	-0.0291972	1695	-5.03588	1091	-1.40529e-07	1078	-2.24117e-07	1158	-0.00112077	1158	-0.00112077
NHLH1	899	1	517	0.425809	913	1	527	1.28237e-05	1455	-3.80955e-05	162	-0.0218971	639	-2.92368	1084	-1.28734e-07	504	4.5675e-08	1017	-0.000275183	1017	-0.000275183
HNRNPUL1	899	1	977	1	913	1	1215	-5.78231e-06	1360	-1.3334e-05	1415	-0.0320325	1134	-3.72508	1178	-4.46487e-07	1041	-1.52272e-07	1558	-0.00602066	1558	-0.00602066
H4K12ac	899	1	852	0.849848	913	1	693	4.01765e-06	833	6.85391e-06	617	-0.0287306	1820	-5.9373	1035	-5.90824e-08	1051	-1.74054e-07	624	0.00138979	624	0.00138979
SUV39H1	899	1	977	1	792	0.813588	1269	-8.14337e-06	959	1.01748e-06	1839	-0.0342553	222	-1.88719	557	2.8252e-08	493	6.90766e-08	713	0.000453682	713	0.000453682
RAD21L1	899	1	977	1	913	1	548	1.17796e-05	1192	-2.45452e-06	1514	-0.0323383	1703	-5.06588	1339	-2.94732e-06	1234	-1.36311e-06	1741	-0.01163	1741	-0.01163
POU2F2	899	1	317	0.184695	913	1	804	8.50185e-07	865	5.15364e-06	816	-0.0298512	903	-3.37118	1050	-8.2225e-08	963	-2.46576e-08	1197	-0.00142694	1197	-0.00142694
FERD3L	899	1	215	0.0767461	913	1	636	6.61649e-06	648	2.99482e-05	725	-0.0293601	631	-2.91142	1011	-3.45309e-08	958	-1.89991e-08	1123	-0.000928122	1123	-0.000928122
XRCC5	899	1	977	1	701	0.678719	1045	-8.96615e-07	1143	-9.20084e-07	1749	-0.0334477	139	-1.45997	555	3.61111e-08	510	3.86831e-08	674	0.000811437	674	0.000811437
CREM	899	1	977	1	824	0.855526	471	1.84266e-05	598	4.07322e-05	1434	-0.0321114	1932	-9.5032	1079	-1.209e-07	1100	-3.15958e-07	1338	-0.00263753	1338	-0.00263753
GTF2F2	899	1	253	0.103349	913	1	562	1.09032e-05	781	1.11343e-05	227	-0.0238198	487	-2.63694	1014	-3.69017e-08	494	6.86377e-08	1238	-0.00170495	1238	-0.00170495
ZNF292	899	1	447	0.337289	913	1	539	1.2273e-05	586	4.51894e-05	1878	-0.0352924	52	0.396763	566	1.43759e-08	974	-3.53259e-08	722	0.000353544	722	0.000353544
POLR2M	899	1	977	1	811	0.841047	1288	-9.86452e-06	567	5.20694e-05	1572	-0.032555	1621	-4.77423	991	-1.51542e-08	501	5.34991e-08	1022	-0.000324707	1022	-0.000324707
ZNF367	899	1	977	1	913	1	1092	-1.74691e-06	1331	-1.05549e-05	1328	-0.0317611	1615	-4.76002	1195	-5.73737e-07	431	3.88504e-07	1643	-0.00813528	1643	-0.00813528
GRWD1	899	1	808	0.78164	913	1	724	2.99349e-06	806	8.64437e-06	726	-0.0293659	1669	-4.90179	1006	-2.93793e-08	940	-6.91766e-09	1057	-0.000558427	1057	-0.000558427
NCAPG2	899	1	977	1	913	1	1243	-7.14216e-06	1262	-5.88176e-06	1592	-0.0326278	767	-3.13875	463	6.03703e-07	454	2.03835e-07	1113	-0.000880693	1113	-0.000880693
E2F5	899	1	939	0.9559	913	1	1194	-4.8121e-06	1362	-1.36449e-05	951	-0.0303843	883	-3.34023	1103	-1.59119e-07	1043	-1.56125e-07	1616	-0.00760026	1616	-0.00760026
MZF1	899	1	977	1	913	1	1349	-1.50528e-05	716	1.79245e-05	1100	-0.0309663	1893	-7.08787	1130	-2.27975e-07	1162	-6.49151e-07	1244	-0.00177604	1244	-0.00177604
ZNF214	899	1	707	0.65622	789	0.8127	745	2.13542e-06	753	1.34137e-05	522	-0.0280698	1634	-4.80698	1169	-3.94117e-07	986	-4.77765e-08	1375	-0.0031392	1375	-0.0031392
ASXL2	899	1	977	1	775	0.791966	514	1.34971e-05	1236	-3.75579e-06	1558	-0.0324885	858	-3.30441	1077	-1.19899e-07	1034	-1.381e-07	1295	-0.00227522	1295	-0.00227522
GABPA	899	1	977	1	773	0.788553	423	2.42938e-05	1526	-8.05698e-05	1571	-0.0325501	1102	-3.66475	1298	-1.92758e-06	1322	-3.42881e-06	1083	-0.000664089	1083	-0.000664089
KDM5D	899	1	936	0.950615	913	1	444	2.19227e-05	494	8.30467e-05	1888	-0.0358284	871	-3.32432	1104	-1.6112e-07	1077	-2.23582e-07	1494	-0.00494256	1494	-0.00494256
G-quadruplexes	899	1	977	1	913	1	1066	-1.15801e-06	1518	-7.46392e-05	1462	-0.0321819	1592	-4.69145	1185	-4.84114e-07	1048	-1.71731e-07	1461	-0.00420682	1461	-0.00420682
ZNF483	899	1	977	1	540	0.374795	630	6.91446e-06	1216	-3.12146e-06	1666	-0.0329615	865	-3.31569	492	3.01851e-07	482	1.00331e-07	564	0.00200496	564	0.00200496
KLF15	899	1	778	0.746198	903	0.983108	1022	-5.56445e-07	775	1.14066e-05	1559	-0.0324928	98	-1.16023	1158	-3.25865e-07	1148	-5.31697e-07	1126	-0.000934429	1126	-0.000934429
H4K16ac	899	1	977	1	913	1	415	2.52467e-05	652	2.95493e-05	1307	-0.0316729	1580	-4.66527	1247	-1.02808e-06	1271	-2.12687e-06	1825	-0.0161556	1825	-0.0161556
HBZ	899	1	977	1	661	0.596775	1075	-1.35939e-06	701	2.00882e-05	884	-0.0301366	1653	-4.85356	520	1.39934e-07	514	3.24643e-08	648	0.00106908	648	0.00106908
PBX1	899	1	977	1	603	0.508121	1155	-3.56305e-06	788	1.0023e-05	965	-0.0304308	1697	-5.05616	493	3.01227e-07	918	-3.0829e-10	266	0.00744338	266	0.00744338
ZNF837	899	1	977	1	913	1	668	5.29834e-06	808	8.46513e-06	1274	-0.0315917	1827	-6.01312	1064	-9.71782e-08	961	-2.03296e-08	1038	-0.000434855	1038	-0.000434855
ZNF48	899	1	977	1	739	0.735598	1456	-3.3713e-05	1384	-1.63572e-05	571	-0.0283979	1744	-5.24418	1181	-4.57733e-07	395	8.76031e-07	456	0.00345419	456	0.00345419
HDGF2	899	1	977	1	855	0.919405	713	3.28757e-06	1168	-1.62141e-06	1766	-0.0335792	1097	-3.66098	1177	-4.43906e-07	1033	-1.35938e-07	707	0.000501377	707	0.000501377
NFE2L3	899	1	977	1	735	0.729193	815	7.01063e-07	1003	6.90941e-09	1710	-0.0332246	277	-2.09382	1152	-2.87061e-07	422	4.47217e-07	1366	-0.00302862	1366	-0.00302862
EPOP	899	1	977	1	595	0.488372	425	2.41708e-05	729	1.57409e-05	994	-0.0305641	1887	-6.99558	541	7.93947e-08	477	1.13269e-07	610	0.00157273	610	0.00157273
PROSER1	899	1	803	0.779169	913	1	805	8.15997e-07	754	1.29423e-05	322	-0.0255855	1673	-4.91768	1199	-5.93981e-07	1191	-8.41553e-07	1666	-0.00878359	1666	-0.00878359
RARB	899	1	977	1	913	1	1088	-1.68442e-06	1409	-2.27409e-05	1153	-0.0311951	951	-3.438	584	6.52142e-10	551	3.30728e-10	791	2.22672e-05	791	2.22672e-05
TIGD3	899	1	977	1	913	1	1525	-6.04255e-05	820	7.92779e-06	1908	-0.0377014	1009	-3.5175	1139	-2.61028e-07	1074	-2.16538e-07	1207	-0.00146209	1207	-0.00146209
RBM15	899	1	684	0.629413	913	1	519	1.32687e-05	741	1.45789e-05	1387	-0.0319133	266	-2.03781	1173	-4.1434e-07	1110	-3.72323e-07	1659	-0.00853192	1659	-0.00853192
HESX1	899	1	709	0.658481	913	1	468	1.87946e-05	594	4.29913e-05	754	-0.0295328	1428	-4.27234	1034	-5.88587e-08	950	-1.27588e-08	978	-0.000108731	978	-0.000108731
TSHZ2	899	1	434	0.321232	913	1	598	8.66746e-06	624	3.48278e-05	1037	-0.0307505	748	-3.09948	1273	-1.58594e-06	1146	-5.25087e-07	1600	-0.00708995	1600	-0.00708995
ZNF280C	899	1	977	1	913	1	1135	-2.85404e-06	955	1.12667e-06	1678	-0.0330111	795	-3.17375	958	-1.0095e-09	548	1.51758e-09	941	-6.76181e-06	941	-6.76181e-06
KDM6B	899	1	977	1	708	0.688678	634	6.71603e-06	765	1.21928e-05	1847	-0.0344129	1254	-3.94702	1140	-2.61541e-07	1096	-2.9869e-07	562	0.00200999	562	0.00200999
ZNF600	899	1	619	0.542329	913	1	556	1.13124e-05	700	2.0112e-05	1638	-0.0328443	94	-1.08365	1264	-1.44454e-06	1120	-4.19894e-07	1501	-0.00513362	1501	-0.00513362
ZNF408	899	1	502	0.402726	913	1	1342	-1.43362e-05	1389	-1.76685e-05	1043	-0.0307738	51	0.696997	1071	-1.10943e-07	1026	-1.20825e-07	1221	-0.00155275	1221	-0.00155275
ZNF433	899	1	977	1	913	1	1278	-8.77703e-06	868	5.03314e-06	1811	-0.0339715	1373	-4.16077	547	5.40268e-08	1085	-2.47753e-07	698	0.000581721	698	0.000581721
EMSY	899	1	854	0.852429	913	1	834	3.72732e-07	581	4.73345e-05	1604	-0.0326812	557	-2.76592	1314	-2.35567e-06	437	3.76786e-07	1915	-0.0275667	1915	-0.0275667
ETV5	899	1	977	1	913	1	597	8.68511e-06	1412	-2.30933e-05	1883	-0.0356305	572	-2.79651	1111	-1.76682e-07	1044	-1.60427e-07	1143	-0.00102136	1143	-0.00102136
ZNF658	899	1	977	1	502	0.312783	655	5.84616e-06	773	1.15963e-05	1756	-0.0334956	1205	-3.85978	517	1.58837e-07	1054	-1.74766e-07	182	0.0101405	182	0.0101405
TCEB3	899	1	977	1	802	0.830322	1208	-5.59555e-06	742	1.45567e-05	1651	-0.0328919	893	-3.35209	1055	-9.02644e-08	1072	-2.13109e-07	584	0.00181712	584	0.00181712
HOXA11	899	1	977	1	845	0.888867	1089	-1.69125e-06	1368	-1.38665e-05	1639	-0.0328452	1482	-4.38492	1223	-7.8085e-07	1197	-9.09291e-07	1417	-0.00369468	1417	-0.00369468
ZNF12	899	1	977	1	913	1	1168	-4.03372e-06	1393	-1.82857e-05	1667	-0.0329653	1185	-3.82355	1045	-7.03239e-08	513	3.28116e-08	760	0.000112268	760	0.000112268
NCL	899	1	977	1	666	0.602853	1259	-7.82489e-06	1426	-2.94449e-05	1886	-0.0357573	838	-3.26857	523	1.204e-07	485	8.90053e-08	650	0.00100403	650	0.00100403
H4R3me2	899	1	674	0.618419	913	1	736	2.41332e-06	410	0.000139727	1797	-0.0338919	396	-2.42589	1101	-1.54509e-07	1099	-3.15867e-07	1187	-0.0013594	1187	-0.0013594
NR1D1	899	1	915	0.918546	913	1	1102	-1.87258e-06	557	5.42881e-05	1784	-0.0337834	123	-1.34797	1156	-3.08071e-07	1139	-5.06356e-07	1053	-0.000542379	1053	-0.000542379
SCML2	899	1	956	0.978069	913	1	467	1.88144e-05	1322	-9.62167e-06	240	-0.024057	1732	-5.18457	1285	-1.75595e-06	1037	-1.45583e-07	1900	-0.0247451	1900	-0.0247451
HMGXB3	899	1	977	1	913	1	1175	-4.14438e-06	846	6.16638e-06	1741	-0.0333917	1440	-4.29495	1175	-4.21693e-07	1102	-3.23298e-07	1489	-0.00487626	1489	-0.00487626
FOXP3	899	1	475	0.374254	913	1	426	2.3981e-05	511	7.60658e-05	1684	-0.0330665	609	-2.87139	1065	-1.0313e-07	1071	-2.06787e-07	704	0.000543487	704	0.000543487
HOXA4	899	1	977	1	913	1	589	9.2554e-06	1348	-1.17046e-05	1777	-0.03373	1507	-4.4557	1089	-1.38843e-07	1023	-1.17569e-07	1173	-0.00121651	1173	-0.00121651
H2BP1me1	899	1	977	1	656	0.591487	1203	-5.39662e-06	1418	-2.50823e-05	1658	-0.0329137	1625	-4.78617	1049	-8.14485e-08	529	1.14661e-08	448	0.00356819	448	0.00356819
SNAPC5	899	1	977	1	654	0.588812	1301	-1.0754e-05	925	2.48582e-06	1764	-0.0335479	1553	-4.57241	1115	-1.91841e-07	1019	-1.13145e-07	1074	-0.000633914	1074	-0.000633914
SIX1	899	1	977	1	913	1	1316	-1.1844e-05	1212	-3.03511e-06	1580	-0.0325824	331	-2.2427	1363	-3.83164e-06	1256	-1.78775e-06	1747	-0.0119642	1747	-0.0119642
SRSF1	899	1	977	1	797	0.819711	446	2.18135e-05	1454	-3.78582e-05	1831	-0.0341508	1568	-4.62078	1142	-2.65879e-07	1179	-7.30495e-07	1161	-0.00115359	1161	-0.00115359
YWHAZ	899	1	977	1	913	1	1097	-1.78838e-06	882	4.33429e-06	1770	-0.0336707	1096	-3.66097	1148	-2.74544e-07	1060	-1.83863e-07	1508	-0.00523562	1508	-0.00523562
ASF1A	899	1	977	1	634	0.565184	1227	-6.48036e-06	1344	-1.14936e-05	1843	-0.0343326	1104	-3.66585	495	2.84681e-07	1215	-1.09581e-06	350	0.00539922	350	0.00539922
TOX2	899	1	977	1	628	0.557486	1131	-2.81003e-06	859	5.47584e-06	1823	-0.0340901	204	-1.82215	1090	-1.39831e-07	1005	-8.36943e-08	363	0.00512042	363	0.00512042
SIN3B	899	1	509	0.416953	913	1	277	6.86761e-05	634	3.28615e-05	1539	-0.0324221	618	-2.89006	1225	-7.93342e-07	1152	-5.42835e-07	1645	-0.00817722	1645	-0.00817722
ZNF230	899	1	977	1	913	1	1198	-4.96004e-06	784	1.07605e-05	1682	-0.0330455	837	-3.26746	1137	-2.57887e-07	1136	-4.90577e-07	1132	-0.000966395	1132	-0.000966395
NFE2	899	1	977	1	913	1	686	4.33451e-06	675	2.39899e-05	1371	-0.0318687	1765	-5.38534	999	-2.31319e-08	505	4.49802e-08	763	0.000104309	763	0.000104309
ZNF397	899	1	945	0.96435	913	1	788	1.22215e-06	1307	-8.40864e-06	1365	-0.0318585	351	-2.30223	573	8.35736e-09	535	4.87243e-09	956	-4.36539e-05	956	-4.36539e-05
THRAP3	899	1	977	1	913	1	1389	-2.09276e-05	1207	-2.78346e-06	1905	-0.0373527	616	-2.88835	1151	-2.83305e-07	1105	-3.54071e-07	1248	-0.00182004	1248	-0.00182004
MAU2	899	1	820	0.793373	913	1	551	1.15927e-05	886	4.06726e-06	1300	-0.0316521	728	-3.07035	1309	-2.18334e-06	1283	-2.39151e-06	1603	-0.00719611	1603	-0.00719611
SMC1B	899	1	977	1	861	0.927174	602	8.30856e-06	757	1.27799e-05	1560	-0.0324983	1298	-4.02273	1192	-5.41301e-07	1171	-7.04401e-07	1427	-0.00382596	1427	-0.00382596
IGF1	899	1	977	1	913	1	666	5.43914e-06	771	1.17372e-05	1469	-0.0321957	1681	-4.96132	1056	-9.04116e-08	991	-5.91326e-08	981	-0.00012599	981	-0.00012599
ZNF140	899	1	977	1	653	0.587729	1375	-1.84514e-05	608	3.78516e-05	1670	-0.0329793	1907	-7.58154	545	5.85501e-08	489	8.06543e-08	645	0.00109904	645	0.00109904
ATAD3A	899	1	359	0.233244	719	0.700939	267	7.30546e-05	512	7.59615e-05	503	-0.0279239	1837	-6.12036	1198	-5.87325e-07	1167	-6.69323e-07	1362	-0.00295866	1362	-0.00295866
SIRT6	899	1	977	1	913	1	1251	-7.48283e-06	401	0.000154636	1159	-0.0312173	1897	-7.19959	1321	-2.51299e-06	1221	-1.15124e-06	1667	-0.00880536	1667	-0.00880536
COBLL1	899	1	977	1	913	1	1476	-3.88773e-05	1315	-9.05177e-06	1933	-0.0406693	917	-3.39087	1146	-2.7293e-07	445	2.90233e-07	1264	-0.00193615	1264	-0.00193615
KLF3	899	1	977	1	455	0.23883	1634	-0.000150673	891	4.02091e-06	1364	-0.0318517	539	-2.72391	455	7.07845e-07	468	1.29181e-07	495	0.0028844	495	0.0028844
HAT1	899	1	396	0.277782	913	1	623	7.12709e-06	795	9.1895e-06	1000	-0.0305905	435	-2.53292	1348	-3.25202e-06	1280	-2.3183e-06	1145	-0.0010311	1145	-0.0010311
PCBP1	899	1	862	0.858773	913	1	1326	-1.31096e-05	790	9.89654e-06	506	-0.0279516	1128	-3.71843	1252	-1.13631e-06	1116	-3.97231e-07	1569	-0.00624551	1569	-0.00624551
ZNF622	899	1	639	0.571278	856	0.923283	580	9.65307e-06	714	1.83663e-05	286	-0.0249508	1890	-7.03909	1082	-1.26451e-07	1004	-8.18548e-08	1307	-0.00235378	1307	-0.00235378
NAIF1	899	1	977	1	557	0.409748	1363	-1.70912e-05	645	3.0758e-05	1633	-0.0328256	1187	-3.8267	499	2.63035e-07	421	4.56864e-07	579	0.00187157	579	0.00187157
ADNP2	899	1	977	1	913	1	1377	-1.85442e-05	595	4.25635e-05	1647	-0.0328803	1441	-4.29625	1125	-2.18193e-07	1160	-6.16019e-07	945	-1.05655e-05	945	-1.05655e-05
POLR3A	899	1	977	1	913	1	1257	-7.78098e-06	954	1.30326e-06	1597	-0.0326542	1570	-4.62233	513	1.85471e-07	500	5.36998e-08	773	6.61701e-05	773	6.61701e-05
KLF13	899	1	740	0.702473	913	1	383	3.00976e-05	876	4.5357e-06	158	-0.0218439	1809	-5.79156	1276	-1.61986e-06	1284	-2.40311e-06	1714	-0.0103955	1714	-0.0103955
ZNF521	899	1	977	1	637	0.570365	764	1.76526e-06	798	8.81573e-06	1676	-0.0330083	1750	-5.27537	1240	-9.57571e-07	1117	-4.02518e-07	601	0.00165387	601	0.00165387
TERF2	899	1	247	0.096927	913	1	220	0.00010553	374	0.000197781	186	-0.0228236	1797	-5.70481	1108	-1.66313e-07	949	-1.2736e-08	1042	-0.000456675	1042	-0.000456675
NCBP1	899	1	977	1	913	1	298	6.00954e-05	1321	-9.38721e-06	1803	-0.0339124	1688	-4.98202	1343	-3.05055e-06	1227	-1.23428e-06	1678	-0.00909792	1678	-0.00909792
NKX6-1	899	1	977	1	697	0.673603	1284	-9.42604e-06	604	4.01148e-05	1793	-0.0338405	1678	-4.9514	470	5.02818e-07	430	3.95755e-07	994	-0.000179248	994	-0.000179248
ZNF184	899	1	977	1	799	0.823235	542	1.21009e-05	1173	-1.84163e-06	1550	-0.0324464	1294	-4.01396	1145	-2.72492e-07	1142	-5.11465e-07	1242	-0.00177241	1242	-0.00177241
BCL3	899	1	977	1	571	0.441477	1078	-1.37171e-06	1327	-1.0154e-05	1698	-0.0331488	500	-2.65716	439	1.01996e-06	957	-1.85635e-08	291	0.00674385	291	0.00674385
HIV Tat	899	1	977	1	832	0.873918	1115	-2.28886e-06	1404	-2.17973e-05	1879	-0.035321	1419	-4.24794	1147	-2.73128e-07	1109	-3.66369e-07	1324	-0.00250791	1324	-0.00250791
SMAD4	899	1	977	1	913	1	991	-1.87318e-07	674	2.40414e-05	1568	-0.0325466	1759	-5.32257	1117	-1.92756e-07	459	1.76911e-07	725	0.000323167	725	0.000323167
EPAS1	899	1	977	1	913	1	599	8.41024e-06	1353	-1.29662e-05	1165	-0.0312469	1785	-5.54528	1184	-4.79113e-07	394	8.82436e-07	641	0.00121883	641	0.00121883
H3K5ac	899	1	977	1	913	1	401	2.77776e-05	1429	-3.01275e-05	1598	-0.0326577	869	-3.31908	1153	-2.87593e-07	516	3.08203e-08	1119	-0.000897801	1119	-0.000897801
PHC1	899	1	977	1	913	1	1307	-1.12333e-05	1487	-5.29773e-05	1586	-0.0325913	1341	-4.10479	1215	-7.25583e-07	1176	-7.22817e-07	972	-9.23074e-05	972	-9.23074e-05
FIP1L1	899	1	977	1	913	1	801	8.78361e-07	1376	-1.54264e-05	1216	-0.0314149	1562	-4.60956	1367	-3.86137e-06	1232	-1.3459e-06	1621	-0.00771991	1621	-0.00771991
MCM7	899	1	977	1	836	0.877635	1292	-1.00803e-05	618	3.60645e-05	1935	-0.0408752	1908	-7.68005	1112	-1.77651e-07	487	8.22105e-08	1414	-0.00365689	1414	-0.00365689
ARID1A	899	1	977	1	913	1	335	4.32937e-05	1147	-1.00651e-06	1522	-0.0323517	537	-2.72299	1409	-5.73627e-06	1400	-7.33985e-06	1862	-0.0197627	1862	-0.0197627
H3K79me3	899	1	977	1	913	1	1183	-4.37217e-06	1247	-4.44366e-06	1280	-0.031608	1696	-5.04718	1054	-8.95308e-08	1129	-4.43029e-07	1141	-0.0010003	1141	-0.0010003
SNAPC4	899	1	977	1	635	0.567769	1004	-2.96627e-07	706	1.98034e-05	1549	-0.032446	607	-2.86996	550	4.63793e-08	1082	-2.37361e-07	479	0.0031817	479	0.0031817
GLI2	899	1	977	1	913	1	1170	-4.06647e-06	1361	-1.36276e-05	1655	-0.0329012	1624	-4.78485	1424	-6.3724e-06	1441	-1.07246e-05	1622	-0.00773208	1622	-0.00773208
ZNF619	899	1	790	0.762615	913	1	402	2.7756e-05	1494	-5.91682e-05	382	-0.0266048	921	-3.39615	1167	-3.89396e-07	1168	-6.74736e-07	1715	-0.0104583	1715	-0.0104583
MCM5	899	1	977	1	913	1	1402	-2.33506e-05	1622	-0.000191908	1632	-0.032816	313	-2.20099	1470	-1.00826e-05	1486	-1.44354e-05	1592	-0.00690464	1592	-0.00690464
ZNF174	899	1	977	1	699	0.676596	399	2.80687e-05	495	8.27296e-05	1802	-0.0339082	1620	-4.76967	567	1.43592e-08	1119	-4.14243e-07	523	0.00247983	523	0.00247983
FLI1	899	1	977	1	537	0.372873	334	4.4111e-05	580	4.78617e-05	1875	-0.0350631	1911	-7.76685	1143	-2.66114e-07	970	-3.13579e-08	453	0.00349744	453	0.00349744
ZBED2	899	1	977	1	913	1	1501	-4.84816e-05	1472	-4.44821e-05	1782	-0.0337786	1349	-4.12571	1440	-7.25183e-06	1356	-5.13499e-06	1615	-0.00755299	1615	-0.00755299
ASH2L	899	1	350	0.225788	913	1	439	2.26844e-05	506	7.84541e-05	1921	-0.038558	65	-0.130396	1202	-6.13068e-07	1114	-3.84581e-07	1550	-0.00590057	1550	-0.00590057
TRIM24	899	1	977	1	608	0.517888	490	1.62198e-05	1420	-2.63468e-05	1254	-0.0315367	1822	-5.97385	1190	-5.32418e-07	499	5.89845e-08	590	0.00174507	590	0.00174507
NR2F6	899	1	977	1	530	0.356748	302	5.78859e-05	1340	-1.11095e-05	777	-0.0296588	1936	-9.84291	451	8.04785e-07	1144	-5.22831e-07	437	0.00375388	437	0.00375388
WT1	899	1	904	0.900287	913	1	351	3.9311e-05	1330	-1.03857e-05	1435	-0.0321124	444	-2.54711	1479	-1.07898e-05	1358	-5.18928e-06	1810	-0.0149199	1810	-0.0149199
ZNF124	899	1	977	1	528	0.34977	479	1.73157e-05	1516	-7.13126e-05	1868	-0.0348731	661	-2.95743	1032	-5.55825e-08	443	3.2922e-07	330	0.00590643	330	0.00590643
OVOL1	899	1	977	1	913	1	1161	-3.72981e-06	632	3.34119e-05	1405	-0.031978	1582	-4.66994	1366	-3.84917e-06	1286	-2.47401e-06	1760	-0.0123864	1760	-0.0123864
ZKSCAN8	899	1	977	1	913	1	455	2.10191e-05	482	8.74041e-05	1829	-0.0341221	1900	-7.33811	1129	-2.25912e-07	1196	-9.07043e-07	758	0.000133655	758	0.000133655
WDR33	899	1	977	1	521	0.339517	515	1.34914e-05	1386	-1.69269e-05	1040	-0.0307632	1671	-4.91167	1171	-4.00359e-07	1002	-7.89734e-08	378	0.00470985	378	0.00470985
TRRAP	899	1	977	1	842	0.88511	495	1.56031e-05	799	8.79507e-06	1656	-0.0329103	1376	-4.16953	1250	-1.06714e-06	1201	-9.35408e-07	1036	-0.000423439	1036	-0.000423439
BPTF	899	1	977	1	418	0.158846	987	-1.72078e-07	1415	-2.35955e-05	1623	-0.0327665	1534	-4.53596	441	9.84761e-07	400	8.2143e-07	428	0.00388403	428	0.00388403
HMBOX1	899	1	977	1	913	1	374	3.23713e-05	1422	-2.80804e-05	1870	-0.0349792	943	-3.42611	1582	-2.45509e-05	1625	-4.17197e-05	1911	-0.0271631	1911	-0.0271631
PROX1	899	1	977	1	454	0.237147	1396	-2.26025e-05	778	1.13185e-05	1643	-0.032864	877	-3.33661	447	8.7312e-07	392	9.08008e-07	494	0.00291747	494	0.00291747
ILF3	899	1	977	1	779	0.799094	568	1.05783e-05	1512	-6.85727e-05	942	-0.0303551	200	-1.79969	511	1.98042e-07	461	1.69975e-07	709	0.00048405	709	0.00048405
SS18	899	1	977	1	913	1	1199	-5.10916e-06	704	1.99049e-05	1573	-0.0325627	1217	-3.88532	1356	-3.46872e-06	1275	-2.28976e-06	1611	-0.00743985	1611	-0.00743985
HNRNPL	899	1	977	1	714	0.697857	664	5.4608e-06	501	8.09865e-05	1929	-0.0401678	1774	-5.45191	1351	-3.33947e-06	1300	-2.76664e-06	1288	-0.00220911	1288	-0.00220911
MAFG	899	1	977	1	761	0.771674	287	6.50013e-05	523	7.06132e-05	1931	-0.0403815	1906	-7.54107	1384	-4.63564e-06	1314	-3.0482e-06	557	0.00203958	557	0.00203958
ZNF616	899	1	977	1	824	0.855526	382	3.01136e-05	1546	-9.88877e-05	1621	-0.0327645	1346	-4.12257	1408	-5.73333e-06	353	2.07231e-06	1346	-0.00275903	1346	-0.00275903
SOX10	899	1	977	1	817	0.844647	363	3.4906e-05	1120	-2.77073e-07	1685	-0.0330722	1155	-3.75795	525	1.0984e-07	458	1.78957e-07	790	2.25609e-05	790	2.25609e-05
PLRG1	899	1	977	1	913	1	1144	-3.1856e-06	787	1.0086e-05	1787	-0.0338142	1216	-3.88288	1461	-9.20558e-06	1405	-7.64319e-06	1866	-0.0199887	1866	-0.0199887
KDM2A	899	1	977	1	913	1	1256	-7.75862e-06	801	8.77003e-06	1186	-0.0313279	1731	-5.18264	1538	-1.86388e-05	1514	-1.79195e-05	1904	-0.0253016	1904	-0.0253016
ZNF830	899	1	902	0.898235	913	1	1222	-6.17381e-06	650	2.97081e-05	1657	-0.0329128	120	-1.33557	1308	-2.17198e-06	1173	-7.12045e-07	1526	-0.0054943	1526	-0.0054943
DCP2	899	1	369	0.244906	913	1	690	4.19881e-06	564	5.25254e-05	933	-0.0303142	969	-3.46495	1210	-7.13072e-07	1174	-7.13588e-07	1590	-0.00689034	1590	-0.00689034
ZNF614	899	1	271	0.12498	913	1	447	2.16653e-05	404	0.000151764	731	-0.0293826	819	-3.22912	1338	-2.94572e-06	1276	-2.29079e-06	1686	-0.00933886	1686	-0.00933886
NFIL3	899	1	946	0.965552	633	0.562608	1489	-4.47905e-05	1564	-0.000108206	130	-0.0206322	1141	-3.73685	1313	-2.35392e-06	1246	-1.63819e-06	729	0.000300323	729	0.000300323
SALL2	899	1	977	1	494	0.304794	1329	-1.34954e-05	1449	-3.67696e-05	1088	-0.0309282	1721	-5.13147	460	6.1883e-07	412	6.68174e-07	531	0.00238309	531	0.00238309
SERPINE1	899	1	977	1	599	0.496665	1357	-1.56456e-05	1443	-3.48359e-05	954	-0.0303978	1846	-6.22223	1267	-1.48893e-06	1225	-1.19851e-06	591	0.00173301	591	0.00173301
ZFP36L2	899	1	977	1	913	1	1385	-1.99707e-05	1373	-1.51212e-05	1659	-0.0329249	1296	-4.01969	568	1.40713e-08	1066	-1.92813e-07	688	0.000676639	688	0.000676639
ETS2	899	1	600	0.511702	659	0.594173	255	7.84202e-05	319	0.000278534	1900	-0.0367313	1902	-7.35662	1325	-2.66128e-06	1203	-9.47759e-07	1314	-0.002412	1314	-0.002412
ERCC2	899	1	377	0.25915	913	1	326	4.59704e-05	483	8.71546e-05	1722	-0.0332858	532	-2.71598	1163	-3.56986e-07	992	-5.97411e-08	1072	-0.000625885	1072	-0.000625885
SRF	899	1	977	1	913	1	338	4.31444e-05	1457	-3.86278e-05	1480	-0.0322269	1388	-4.1872	1597	-2.89536e-05	1584	-3.10385e-05	1547	-0.00588279	1547	-0.00588279
IRF9	899	1	977	1	704	0.682615	272	7.06091e-05	1421	-2.733e-05	1824	-0.0340964	1525	-4.5242	1013	-3.5828e-08	1024	-1.18881e-07	506	0.00271509	506	0.00271509
HOXD1	899	1	977	1	785	0.805739	1488	-4.40217e-05	1514	-6.97088e-05	1794	-0.0338638	629	-2.90809	1287	-1.78264e-06	1394	-6.95231e-06	386	0.0045243	386	0.0045243
TCF15	899	1	977	1	913	1	342	4.16289e-05	1385	-1.64185e-05	1472	-0.0322045	755	-3.11202	1418	-6.02646e-06	1329	-3.76777e-06	1829	-0.0165112	1829	-0.0165112
EBF3	899	1	753	0.713964	832	0.873918	263	7.46163e-05	553	5.5637e-05	778	-0.0296595	1787	-5.57508	385	3.14459e-06	351	2.09856e-06	1413	-0.00364547	1413	-0.00364547
INTS3	899	1	977	1	471	0.259648	1465	-3.50857e-05	1539	-8.77551e-05	1858	-0.0346111	1264	-3.9761	427	1.36424e-06	365	1.63035e-06	507	0.00271509	507	0.00271509
H3R3me2	899	1	977	1	845	0.888867	843	2.65162e-07	1447	-3.62937e-05	395	-0.0267253	1736	-5.19893	433	1.17766e-06	1273	-2.25726e-06	990	-0.000166234	990	-0.000166234
ZBTB34	899	1	977	1	913	1	1352	-1.50775e-05	1399	-1.97864e-05	1641	-0.0328551	1461	-4.3327	1244	-1.00493e-06	1188	-7.93792e-07	1191	-0.00139642	1191	-0.00139642
RELA	899	1	977	1	913	1	1193	-4.7444e-06	719	1.76665e-05	1452	-0.0321664	381	-2.40013	1354	-3.43558e-06	1328	-3.61553e-06	1652	-0.00833305	1652	-0.00833305
VSV-G	899	1	977	1	913	1	442	2.22928e-05	696	2.1024e-05	1466	-0.0321944	1660	-4.8806	1144	-2.69998e-07	1181	-7.42851e-07	1116	-0.000888903	1116	-0.000888903
RORB	899	1	977	1	778	0.798827	1014	-4.95721e-07	1363	-1.36547e-05	1567	-0.0325389	989	-3.48385	1392	-4.99393e-06	1214	-1.08885e-06	1363	-0.00297672	1363	-0.00297672
PRMT1	899	1	906	0.903636	913	1	260	7.60113e-05	445	0.000113249	1895	-0.0364004	1617	-4.76431	1303	-2.06322e-06	1236	-1.39642e-06	1689	-0.0094311	1689	-0.0094311
ZNF529	899	1	871	0.873215	913	1	411	2.58519e-05	613	3.6671e-05	1445	-0.0321566	842	-3.27632	1491	-1.17415e-05	1495	-1.59937e-05	1805	-0.0145022	1805	-0.0145022
NABP2	899	1	977	1	484	0.281627	1025	-5.7058e-07	702	2.00433e-05	1816	-0.0340222	1879	-6.76238	435	1.09377e-06	384	1.04889e-06	519	0.00255958	519	0.00255958
ZNF701	899	1	977	1	913	1	1353	-1.5106e-05	606	3.95729e-05	278	-0.0248288	1626	-4.79294	1213	-7.17595e-07	1220	-1.13155e-06	1493	-0.00493308	1493	-0.00493308
CREB5	899	1	977	1	913	1	629	6.96051e-06	1680	-0.000338438	1377	-0.0318954	433	-2.52531	1420	-6.18942e-06	1366	-5.64657e-06	1797	-0.0141648	1797	-0.0141648
MYBL1	899	1	600	0.511702	913	1	319	4.85877e-05	1359	-1.3299e-05	1486	-0.032242	214	-1.8581	1234	-8.76948e-07	1106	-3.54613e-07	1649	-0.00827884	1649	-0.00827884
MED4	899	1	977	1	469	0.256098	1165	-3.94789e-06	1319	-9.20375e-06	936	-0.0303189	1556	-4.58252	505	2.30222e-07	484	9.07134e-08	478	0.00319273	478	0.00319273
BRPF3	899	1	977	1	913	1	393	2.8758e-05	638	3.19209e-05	1370	-0.031867	1781	-5.50481	1165	-3.66009e-07	1266	-1.97348e-06	1539	-0.00569117	1539	-0.00569117
PHF6	899	1	977	1	913	1	768	1.67532e-06	767	1.20163e-05	1856	-0.0345769	1707	-5.0846	1359	-3.58383e-06	442	3.43892e-07	1536	-0.00564854	1536	-0.00564854
ZNF77	899	1	951	0.971246	913	1	379	3.06328e-05	907	3.39175e-06	1615	-0.0327361	465	-2.59602	1132	-2.32688e-07	1122	-4.28332e-07	1577	-0.00635547	1577	-0.00635547
QRICH1	899	1	736	0.695708	913	1	1258	-7.7953e-06	792	9.85489e-06	1097	-0.0309581	1235	-3.91311	1315	-2.37192e-06	1321	-3.35833e-06	1670	-0.00890756	1670	-0.00890756
ZNF511	899	1	977	1	718	0.698533	482	1.71182e-05	756	1.28804e-05	1605	-0.0326837	994	-3.49153	459	6.26719e-07	452	2.11754e-07	680	0.000750077	680	0.000750077
PADI2	899	1	438	0.326111	913	1	195	0.000143273	248	0.000484215	1521	-0.0323509	1607	-4.74679	1413	-5.8113e-06	1348	-4.44619e-06	1691	-0.00945351	1691	-0.00945351
ZNF197	899	1	441	0.330903	913	1	183	0.0001733	250	0.000479379	1867	-0.0348531	1917	-7.99661	1358	-3.52229e-06	1312	-2.9998e-06	1448	-0.00411545	1448	-0.00411545
E2F7	899	1	977	1	441	0.192412	1384	-1.987e-05	1566	-0.000109338	1195	-0.031372	1421	-4.24981	370	4.01215e-06	336	2.76098e-06	546	0.00221063	546	0.00221063
TRF2	899	1	977	1	913	1	341	4.20953e-05	1555	-0.000103823	1047	-0.0307907	918	-3.39132	481	3.74363e-07	1288	-2.491e-06	1454	-0.00415541	1454	-0.00415541
ZNF225	899	1	934	0.947506	913	1	1359	-1.58796e-05	522	7.06459e-05	1127	-0.0310833	554	-2.75273	1295	-1.90677e-06	1237	-1.39779e-06	1563	-0.00613298	1563	-0.00613298
ZNF430	899	1	214	0.0763235	913	1	475	1.77358e-05	724	1.65012e-05	284	-0.024856	415	-2.47409	1344	-3.05058e-06	1316	-3.15303e-06	1580	-0.00643071	1580	-0.00643071
H2AK120Ub	899	1	977	1	913	1	1325	-1.30507e-05	507	7.80618e-05	814	-0.0298414	1857	-6.3138	1568	-2.29983e-05	1505	-1.68655e-05	1899	-0.0239191	1899	-0.0239191
NUP93	899	1	485	0.383549	913	1	420	2.48201e-05	484	8.70305e-05	1084	-0.030912	774	-3.14757	1475	-1.06541e-05	1347	-4.43396e-06	1784	-0.0136983	1784	-0.0136983
NRP2	899	1	977	1	662	0.596869	1411	-2.42696e-05	1506	-6.4764e-05	347	-0.0260328	1910	-7.70937	1326	-2.6672e-06	1206	-9.89318e-07	527	0.00243329	527	0.00243329
WDHD1	899	1	977	1	913	1	976	-9.12487e-08	1235	-3.74823e-06	1423	-0.0320576	895	-3.35423	1397	-5.22914e-06	1339	-4.06044e-06	1663	-0.00859845	1663	-0.00859845
JUND	899	1	977	1	913	1	1322	-1.29066e-05	1488	-5.30752e-05	1739	-0.0333753	719	-3.05758	1437	-6.92435e-06	1368	-5.6729e-06	1816	-0.0153906	1816	-0.0153906
IKZF1	899	1	801	0.778677	913	1	337	4.31954e-05	1394	-1.83218e-05	805	-0.0298138	407	-2.46043	1508	-1.40841e-05	241	1.35993e-05	1599	-0.00704332	1599	-0.00704332
ZNF607	899	1	977	1	913	1	1424	-2.62001e-05	443	0.000115291	1809	-0.0339574	544	-2.73459	1436	-6.90578e-06	401	7.88201e-07	1500	-0.00511125	1500	-0.00511125
BRAF	899	1	977	1	913	1	545	1.20132e-05	1468	-4.32785e-05	1610	-0.0326957	1600	-4.72411	1395	-5.05235e-06	1323	-3.50563e-06	1739	-0.0115157	1739	-0.0115157
STAT5B	899	1	763	0.729487	913	1	1178	-4.27772e-06	1273	-6.31006e-06	1251	-0.0315297	1152	-3.75216	1134	-2.46588e-07	1028	-1.24995e-07	1552	-0.00591884	1552	-0.00591884
ATF6	899	1	977	1	513	0.321369	733	2.70809e-06	1520	-7.66489e-05	872	-0.0300853	1573	-4.64798	1196	-5.74897e-07	352	2.08931e-06	1152	-0.00108016	1152	-0.00108016
PLSCR1	899	1	977	1	913	1	513	1.35122e-05	1450	-3.67744e-05	1102	-0.0309777	868	-3.31891	1370	-3.89824e-06	1297	-2.64e-06	1589	-0.00688165	1589	-0.00688165
FOSB	899	1	977	1	650	0.586147	794	1.03768e-06	570	5.14461e-05	1652	-0.0328956	1167	-3.7852	1283	-1.73795e-06	1238	-1.45464e-06	662	0.000884795	662	0.000884795
ALYREF	899	1	977	1	708	0.688678	705	3.60439e-06	1304	-8.27985e-06	1334	-0.0317808	1576	-4.65654	1323	-2.56389e-06	1304	-2.81215e-06	1358	-0.00291936	1358	-0.00291936
PSIP1	899	1	977	1	913	1	1343	-1.4404e-05	485	8.68508e-05	1874	-0.0350579	1558	-4.59535	1385	-4.64004e-06	1222	-1.15669e-06	1639	-0.00811579	1639	-0.00811579
TRIM33	899	1	977	1	913	1	1187	-4.42486e-06	1525	-8.03867e-05	1706	-0.0332135	1231	-3.91134	1271	-1.54353e-06	1267	-1.99337e-06	1472	-0.00448954	1472	-0.00448954
NCOA3	899	1	977	1	913	1	1219	-6.11776e-06	839	6.54194e-06	1399	-0.0319523	380	-2.39739	1446	-7.74445e-06	1442	-1.07372e-05	1882	-0.0218766	1882	-0.0218766
SALL3	899	1	977	1	913	1	1417	-2.48819e-05	1618	-0.000189015	1618	-0.0327568	1213	-3.87063	1513	-1.48437e-05	448	2.40842e-07	1845	-0.0179794	1845	-0.0179794
ZNF205	899	1	905	0.900978	913	1	645	6.17888e-06	1342	-1.13485e-05	1203	-0.0313833	460	-2.58871	1442	-7.54974e-06	1406	-7.66056e-06	1801	-0.0142738	1801	-0.0142738
SATB2	899	1	362	0.235762	663	0.599574	448	2.1634e-05	514	7.50398e-05	457	-0.0274349	1767	-5.39411	1327	-2.70011e-06	1169	-6.75417e-07	998	-0.000204882	998	-0.000204882
IRX2	899	1	823	0.801319	692	0.658805	344	4.06367e-05	414	0.0001387	1619	-0.0327593	1543	-4.55108	518	1.48184e-07	1088	-2.62946e-07	596	0.00168244	596	0.00168244
SPDEF	899	1	977	1	913	1	504	1.49004e-05	1639	-0.000223945	210	-0.0233048	1022	-3.53638	1564	-2.20529e-05	1445	-1.12362e-05	1716	-0.0105108	1716	-0.0105108
ZFP64	899	1	977	1	913	1	392	2.89261e-05	475	9.23005e-05	1069	-0.0308797	1629	-4.7989	1328	-2.75174e-06	1274	-2.28712e-06	1676	-0.009067	1676	-0.009067
MIXL1	899	1	977	1	913	1	1574	-8.97573e-05	660	2.81734e-05	1805	-0.0339201	1724	-5.14551	1576	-2.36445e-05	1502	-1.65526e-05	1217	-0.00152765	1217	-0.00152765
ZNF92	899	1	333	0.205443	913	1	404	2.745e-05	365	0.000213669	489	-0.0277975	1320	-4.06161	1292	-1.84676e-06	1355	-4.97203e-06	1551	-0.00591213	1551	-0.00591213
POLR3G	899	1	977	1	849	0.899092	1449	-3.14931e-05	1244	-4.00526e-06	1594	-0.0326366	1710	-5.09389	1563	-2.20396e-05	1532	-2.11972e-05	1924	-0.0297444	1924	-0.0297444
ZCCHC11	899	1	977	1	659	0.594173	1388	-2.08054e-05	371	0.000204469	766	-0.0295916	1947	-14.1295	531	9.53303e-08	1161	-6.19441e-07	1040	-0.000452167	1040	-0.000452167
H3R17me2	899	1	977	1	913	1	441	2.25568e-05	1456	-3.81308e-05	1236	-0.0314743	1610	-4.75088	1350	-3.33179e-06	1345	-4.36909e-06	1549	-0.00589941	1549	-0.00589941
ZNF276	899	1	977	1	577	0.456387	1244	-7.15966e-06	1558	-0.00010505	1736	-0.0333715	430	-2.51349	1268	-1.49176e-06	1231	-1.31052e-06	983	-0.00013241	983	-0.00013241
PML	899	1	957	0.978558	913	1	414	2.56109e-05	1370	-1.47537e-05	981	-0.0305269	952	-3.43887	1473	-1.0313e-05	1455	-1.18866e-05	1771	-0.0128309	1771	-0.0128309
ACTR5	899	1	977	1	913	1	591	8.97606e-06	1138	-7.86749e-07	1569	-0.032547	416	-2.4762	1318	-2.43031e-06	1302	-2.79407e-06	1491	-0.00492122	1491	-0.00492122
ZNF333	899	1	977	1	678	0.641405	1412	-2.43254e-05	857	5.52835e-06	1679	-0.033013	986	-3.48112	479	3.76885e-07	1200	-9.30456e-07	781	4.21246e-05	781	4.21246e-05
FOXK1	899	1	977	1	913	1	1094	-1.75977e-06	430	0.000124527	781	-0.0296879	1517	-4.49639	1584	-2.50358e-05	1551	-2.46177e-05	1713	-0.0103063	1713	-0.0103063
ZNF383	899	1	977	1	811	0.841047	1345	-1.44574e-05	386	0.000174202	1584	-0.0325879	1318	-4.05925	1249	-1.03332e-06	1164	-6.60589e-07	1027	-0.000355228	1027	-0.000355228
ARID5B	899	1	977	1	913	1	1016	-5.04764e-07	656	2.90011e-05	1897	-0.0364759	1933	-9.52908	1383	-4.63022e-06	1351	-4.61161e-06	1703	-0.00983156	1703	-0.00983156
RTA	899	1	977	1	913	1	1442	-2.98082e-05	1369	-1.42794e-05	1464	-0.032185	816	-3.22431	1406	-5.66155e-06	1383	-6.32615e-06	1561	-0.00606502	1561	-0.00606502
NPAT	899	1	977	1	913	1	1472	-3.81875e-05	1575	-0.000119763	1289	-0.0316312	1693	-5.0274	1499	-1.33281e-05	1303	-2.80068e-06	1653	-0.00836831	1653	-0.00836831
BRD7	899	1	697	0.643835	913	1	364	3.45868e-05	1365	-1.36873e-05	1726	-0.0333045	88	-0.946089	1304	-2.11829e-06	1257	-1.79962e-06	1614	-0.00752822	1614	-0.00752822
POLR1D	899	1	958	0.978883	913	1	1575	-9.00723e-05	1616	-0.000184373	132	-0.0208574	641	-2.92496	1528	-1.68608e-05	1497	-1.60774e-05	1809	-0.0148945	1809	-0.0148945
CIZ1	899	1	977	1	544	0.379341	1451	-3.16865e-05	1565	-0.000108289	1601	-0.0326684	1070	-3.62182	396	2.69267e-06	335	2.81166e-06	566	0.00198711	566	0.00198711
ID3	899	1	977	1	913	1	1444	-3.10015e-05	1501	-6.24522e-05	1321	-0.0317419	626	-2.90677	1355	-3.46677e-06	1353	-4.86516e-06	1673	-0.00902245	1673	-0.00902245
ZNF121	899	1	937	0.950842	913	1	435	2.33398e-05	459	0.0001031	1903	-0.0370934	1920	-8.07966	1534	-1.79409e-05	1512	-1.77467e-05	1895	-0.0233374	1895	-0.0233374
WDR82	899	1	330	0.203125	913	1	487	1.6463e-05	280	0.000368958	1326	-0.0317549	293	-2.14427	1302	-2.0437e-06	1285	-2.4087e-06	1597	-0.00702743	1597	-0.00702743
EBNA3	899	1	977	1	913	1	1247	-7.22263e-06	1489	-5.41786e-05	1524	-0.0323561	1186	-3.82379	1566	-2.25219e-05	1481	-1.37317e-05	1503	-0.00515135	1503	-0.00515135
HNRNPC	899	1	354	0.228257	913	1	380	3.03959e-05	508	7.73567e-05	1662	-0.0329399	272	-2.07926	1060	-9.42321e-08	1211	-1.06546e-06	588	0.00177301	588	0.00177301
ZNF781	899	1	452	0.343001	913	1	211	0.000116937	255	0.000466418	979	-0.0305192	1618	-4.76877	1462	-9.24319e-06	1364	-5.54304e-06	1516	-0.00530376	1516	-0.00530376
PPARA	899	1	977	1	913	1	1355	-1.53084e-05	1559	-0.000105075	1121	-0.0310607	1523	-4.51901	1293	-1.84862e-06	1261	-1.91677e-06	1471	-0.00445349	1471	-0.00445349
ZNF697	899	1	977	1	571	0.441477	1346	-1.44678e-05	1465	-4.08967e-05	1925	-0.038951	1423	-4.25662	1261	-1.27284e-06	466	1.36736e-07	488	0.00300442	488	0.00300442
PHTF2	899	1	832	0.814337	893	0.97495	297	6.09555e-05	418	0.000136577	1798	-0.0338959	1478	-4.37617	1113	-1.78238e-07	1205	-9.73385e-07	1257	-0.00189393	1257	-0.00189393
TAF2	899	1	977	1	842	0.88511	333	4.48838e-05	1296	-7.80062e-06	1493	-0.0322541	1794	-5.67271	1388	-4.72338e-06	1324	-3.51479e-06	1416	-0.00366742	1416	-0.00366742
POU2F1	899	1	848	0.840543	903	0.983108	1373	-1.8286e-05	426	0.000129351	405	-0.0267848	1685	-4.96833	1417	-5.95456e-06	1352	-4.85031e-06	1441	-0.00403865	1441	-0.00403865
KAT2B	899	1	363	0.238296	913	1	303	5.7781e-05	432	0.000123371	516	-0.0280358	1271	-3.9824	1435	-6.79791e-06	1428	-9.68955e-06	1750	-0.0120851	1750	-0.0120851
ZNF311	899	1	977	1	913	1	1434	-2.88783e-05	1563	-0.0001082	412	-0.0268697	1778	-5.48119	1280	-1.67686e-06	1228	-1.27464e-06	1210	-0.00148791	1210	-0.00148791
ASH1L	899	1	977	1	913	1	1460	-3.42659e-05	261	0.000432069	1116	-0.0310456	1852	-6.2814	1648	-3.93149e-05	1546	-2.34428e-05	1788	-0.0138755	1788	-0.0138755
ESR2	899	1	977	1	913	1	360	3.57853e-05	677	2.351e-05	977	-0.0305053	1791	-5.61963	1488	-1.1571e-05	1421	-9.09986e-06	1544	-0.00585016	1544	-0.00585016
TCF7	899	1	977	1	913	1	457	2.08094e-05	1522	-7.73178e-05	1039	-0.030763	1690	-5.00141	1447	-7.8187e-06	1372	-5.77776e-06	1811	-0.0151998	1811	-0.0151998
ZNF239	899	1	977	1	864	0.927633	1440	-2.94168e-05	659	2.81739e-05	1293	-0.0316405	1735	-5.19777	462	6.14955e-07	1057	-1.78523e-07	985	-0.000153192	985	-0.000153192
ORC1	899	1	705	0.656048	913	1	347	4.00492e-05	368	0.000210156	1700	-0.0331517	1752	-5.29041	1371	-3.89905e-06	1375	-5.91149e-06	1583	-0.00661831	1583	-0.00661831
KLF14	899	1	977	1	913	1	1282	-9.12853e-06	1329	-1.03093e-05	1531	-0.0323801	1178	-3.80398	1390	-4.78494e-06	1344	-4.27493e-06	1633	-0.00795284	1633	-0.00795284
ZBED1	899	1	977	1	913	1	1607	-0.000121553	1642	-0.000232246	167	-0.0220307	1948	-15.7105	1402	-5.54698e-06	1245	-1.58701e-06	1464	-0.00432396	1464	-0.00432396
PRDM11	899	1	299	0.164005	735	0.729193	660	5.60992e-06	1617	-0.000186584	171	-0.0220868	156	-1.56395	1335	-2.89739e-06	1367	-5.66217e-06	1371	-0.00312509	1371	-0.00312509
ZNF526	899	1	977	1	777	0.798678	665	5.46024e-06	559	5.37604e-05	1235	-0.0314733	1636	-4.81709	559	2.66687e-08	1020	-1.14086e-07	672	0.000822266	672	0.000822266
DR1	899	1	977	1	787	0.809213	1313	-1.15893e-05	1560	-0.000106094	1762	-0.0335276	1569	-4.62119	1382	-4.59855e-06	1395	-7.0624e-06	1390	-0.00336793	1390	-0.00336793
ALKBH3	899	1	903	0.898296	696	0.672994	355	3.80648e-05	1341	-1.12575e-05	844	-0.0299705	996	-3.49437	410	1.81464e-06	242	1.33608e-05	1636	-0.00805262	1636	-0.00805262
PBX2	899	1	977	1	913	1	1482	-4.02341e-05	599	4.05004e-05	716	-0.0293231	1384	-4.1743	1692	-5.62525e-05	1677	-6.19702e-05	1920	-0.0285487	1920	-0.0285487
RING1	899	1	977	1	913	1	1563	-8.44712e-05	1601	-0.000157911	1842	-0.0343097	1435	-4.28459	1515	-1.557e-05	1443	-1.07971e-05	1876	-0.0213809	1876	-0.0213809
ZSCAN5D	899	1	977	1	913	1	484	1.6637e-05	334	0.000260313	1247	-0.0315142	1842	-6.17114	1340	-2.971e-06	1296	-2.63688e-06	1252	-0.00186435	1252	-0.00186435
TFCP2	899	1	782	0.749835	913	1	317	5.01928e-05	398	0.000159318	877	-0.0301038	1529	-4.52702	1352	-3.38996e-06	1333	-3.85772e-06	1566	-0.00622536	1566	-0.00622536
ARRB1	899	1	977	1	656	0.591487	430	2.38345e-05	1470	-4.3869e-05	1589	-0.0326112	1433	-4.28403	1259	-1.20953e-06	425	4.14613e-07	1005	-0.000218806	1005	-0.000218806
PATZ1	899	1	977	1	367	0.0864884	1286	-9.67395e-06	1499	-6.20858e-05	1346	-0.0318112	1745	-5.24807	397	2.68169e-06	399	8.22946e-07	222	0.00855725	222	0.00855725
USF1	899	1	624	0.548832	913	1	1220	-6.11796e-06	332	0.000263008	801	-0.0297921	178	-1.69223	1698	-5.89748e-05	1699	-7.43965e-05	1889	-0.0223933	1889	-0.0223933
PRDM12	899	1	977	1	668	0.607753	1477	-3.90497e-05	1550	-0.000102458	1673	-0.0329855	383	-2.40538	1294	-1.88711e-06	1330	-3.76988e-06	637	0.00123684	637	0.00123684
GRHL1	899	1	977	1	579	0.458551	1497	-4.66154e-05	1521	-7.66489e-05	1818	-0.0340494	1922	-8.14714	440	9.90291e-07	361	1.71381e-06	1269	-0.00196769	1269	-0.00196769
SIN3A	899	1	977	1	913	1	1466	-3.59049e-05	1631	-0.000209238	1270	-0.0315764	1002	-3.51235	1486	-1.14496e-05	1411	-8.06362e-06	665	0.000834294	665	0.000834294
SOX1	899	1	977	1	913	1	656	5.80774e-06	497	8.23729e-05	1548	-0.0324441	1574	-4.65609	1500	-1.33288e-05	1462	-1.25217e-05	1624	-0.00784612	1624	-0.00784612
H3K4ac	899	1	977	1	618	0.532453	1314	-1.16063e-05	628	3.41088e-05	1645	-0.0328735	785	-3.16295	1141	-2.64646e-07	1301	-2.77807e-06	526	0.00243859	526	0.00243859
AHDC1	899	1	977	1	851	0.907852	1421	-2.55938e-05	1568	-0.000112308	1217	-0.0314171	1701	-5.06368	1422	-6.3156e-06	1399	-7.18408e-06	630	0.00132607	630	0.00132607
ZNF263	899	1	977	1	913	1	559	1.11511e-05	582	4.73094e-05	1140	-0.0311298	1758	-5.31331	1579	-2.38418e-05	1568	-2.78117e-05	1892	-0.022626	1892	-0.022626
TLX1	899	1	977	1	913	1	1298	-1.04744e-05	379	0.000190248	1392	-0.0319335	1788	-5.57838	1415	-5.87301e-06	1325	-3.56452e-06	1574	-0.0063166	1574	-0.0063166
ZNF512	899	1	583	0.492637	913	1	1079	-1.38167e-06	739	1.49169e-05	513	-0.0280288	1154	-3.75673	1516	-1.55876e-05	1472	-1.32465e-05	1777	-0.0134077	1777	-0.0134077
WDR61	899	1	678	0.622805	913	1	460	2.05122e-05	1589	-0.000146819	738	-0.0294158	210	-1.83357	1612	-3.1607e-05	1580	-3.00557e-05	1843	-0.0176465	1843	-0.0176465
MethylCap	899	1	958	0.978883	913	1	1266	-8.07991e-06	1490	-5.52577e-05	1017	-0.0306734	132	-1.39799	1520	-1.59834e-05	1488	-1.49546e-05	1684	-0.00920852	1684	-0.00920852
GLIS3	899	1	977	1	353	0.0715016	679	4.84533e-06	1531	-8.53117e-05	1810	-0.0339686	1245	-3.92815	315	9.9058e-06	387	9.9057e-07	347	0.00545288	347	0.00545288
YEATS2	899	1	443	0.333309	750	0.748551	231	9.6429e-05	251	0.000476105	609	-0.0286819	1858	-6.314	1357	-3.51902e-06	1377	-5.94137e-06	1291	-0.00226234	1291	-0.00226234
ZNF654	899	1	605	0.518755	913	1	1169	-4.05033e-06	646	3.03449e-05	1065	-0.0308509	276	-2.09374	1468	-9.68762e-06	1415	-8.47522e-06	1705	-0.00986412	1705	-0.00986412
YAP1	899	1	483	0.382823	913	1	271	7.14688e-05	260	0.000432321	1919	-0.0385063	1848	-6.25948	1489	-1.16266e-05	1499	-1.62965e-05	1917	-0.0280336	1917	-0.0280336
PCGF5	899	1	977	1	913	1	1473	-3.81882e-05	1541	-9.01366e-05	916	-0.0302472	1071	-3.62202	1372	-4.12327e-06	1294	-2.61289e-06	1593	-0.00690485	1593	-0.00690485
CEBPE	899	1	187	0.0557425	913	1	217	0.000109523	308	0.000303468	275	-0.0247598	1679	-4.95157	1277	-1.66027e-06	1209	-1.02471e-06	1206	-0.001462	1206	-0.001462
RFX3	899	1	977	1	913	1	1390	-2.10605e-05	653	2.92802e-05	701	-0.0292495	1577	-4.65725	1465	-9.52616e-06	1378	-5.9576e-06	1578	-0.00636495	1578	-0.00636495
ONECUT2	899	1	977	1	913	1	1568	-8.68143e-05	1730	-0.000554972	1611	-0.0327091	1717	-5.12554	1502	-1.35687e-05	1412	-8.06573e-06	1306	-0.00233549	1306	-0.00233549
VSX2	899	1	977	1	913	1	278	6.71525e-05	477	9.06505e-05	1625	-0.0327825	1899	-7.27857	1559	-2.15132e-05	1530	-2.11397e-05	447	0.00358872	447	0.00358872
MAF	899	1	977	1	913	1	436	2.30775e-05	1548	-0.000100416	1142	-0.03114	1760	-5.32495	1535	-1.80203e-05	1407	-7.74832e-06	1762	-0.0124737	1762	-0.0124737
POU3F2	899	1	977	1	913	1	1308	-1.14156e-05	463	0.000100179	1716	-0.0332498	1413	-4.23648	1503	-1.35696e-05	1511	-1.75504e-05	1567	-0.00623084	1567	-0.00623084
ZNF785	899	1	977	1	722	0.707137	517	1.34675e-05	1437	-3.21837e-05	1286	-0.0316247	1856	-6.30997	1319	-2.46507e-06	1189	-8.24548e-07	1364	-0.00299765	1364	-0.00299765
PTBP3	899	1	977	1	473	0.266145	1545	-7.15996e-05	1461	-3.97124e-05	1813	-0.0339948	880	-3.3377	411	1.78993e-06	1159	-6.15162e-07	487	0.00300862	487	0.00300862
ZBTB8A	899	1	977	1	913	1	531	1.25162e-05	1498	-6.18317e-05	743	-0.0294463	1567	-4.61971	1421	-6.29219e-06	1416	-8.71386e-06	1528	-0.00555789	1528	-0.00555789
NONO	899	1	559	0.464153	913	1	176	0.000195835	320	0.000278364	660	-0.0289973	1661	-4.88282	1540	-1.90356e-05	1571	-2.82483e-05	1618	-0.00767031	1618	-0.00767031
ZBTB2	899	1	328	0.200737	913	1	496	1.55834e-05	339	0.000251553	922	-0.0302745	462	-2.59124	1494	-1.24593e-05	1461	-1.24445e-05	1840	-0.0174137	1840	-0.0174137
BRF1	899	1	416	0.303998	913	1	234	9.55272e-05	314	0.000289883	1093	-0.030946	564	-2.78273	1718	-7.36005e-05	1660	-5.51033e-05	1832	-0.0167476	1832	-0.0167476
Cyclobutane pyrimidine dimers	899	1	626	0.551451	913	1	340	4.30066e-05	263	0.000421213	1187	-0.0313283	1121	-3.70659	1651	-3.98487e-05	1560	-2.57459e-05	1537	-0.00565336	1537	-0.00565336
DZIP1	899	1	349	0.224559	913	1	228	9.81233e-05	439	0.000120381	505	-0.0279482	1350	-4.12603	1587	-2.57771e-05	1586	-3.13535e-05	1682	-0.00920174	1682	-0.00920174
NFKBIA	899	1	977	1	676	0.638543	765	1.73514e-06	661	2.70617e-05	1898	-0.0364837	1184	-3.82247	1297	-1.91665e-06	1295	-2.62783e-06	1341	-0.00270301	1341	-0.00270301
ARID1B	899	1	792	0.76582	913	1	299	5.93381e-05	403	0.000152647	1792	-0.0338362	884	-3.34067	1400	-5.35395e-06	1385	-6.433e-06	1559	-0.00603299	1559	-0.00603299
PRMT3	899	1	977	1	913	1	151	0.000247357	827	7.53428e-06	1487	-0.0322444	1798	-5.73348	1275	-1.60986e-06	1454	-1.17043e-05	1301	-0.00231313	1301	-0.00231313
ZNF699	899	1	977	1	847	0.892637	751	2.03136e-06	520	7.18644e-05	1145	-0.0311519	1790	-5.61868	1217	-7.59117e-07	1306	-2.89536e-06	602	0.0016516	602	0.0016516
FOXJ2	899	1	690	0.637755	913	1	312	5.20675e-05	362	0.000218623	1279	-0.031604	1042	-3.56771	1605	-3.0315e-05	1391	-6.71801e-06	1780	-0.0135243	1780	-0.0135243
MYBBP1A	899	1	977	1	913	1	1438	-2.9271e-05	542	5.96008e-05	1402	-0.0319625	640	-2.92383	1450	-8.1207e-06	1425	-9.1833e-06	1582	-0.00648008	1582	-0.00648008
PGR	899	1	977	1	893	0.97495	1302	-1.07756e-05	311	0.000293627	1912	-0.0379164	1942	-11.2131	484	3.62096e-07	1045	-1.61184e-07	1439	-0.00401294	1439	-0.00401294
SRSF3	899	1	814	0.788358	900	0.979272	410	2.63928e-05	353	0.000228698	1389	-0.0319188	1098	-3.66148	1592	-2.74294e-05	1574	-2.87517e-05	1925	-0.0298807	1925	-0.0298807
ASPSCR1	899	1	977	1	642	0.575586	1596	-0.000110969	236	0.000530783	1231	-0.0314491	1258	-3.96366	403	2.38809e-06	1318	-3.20782e-06	597	0.00167182	597	0.00167182
SUMO2	899	1	977	1	913	1	1267	-8.12978e-06	1347	-1.16128e-05	1476	-0.03221	1323	-4.0672	1501	-1.33629e-05	1430	-9.73245e-06	1775	-0.0133009	1775	-0.0133009
GLIS2	899	1	977	1	913	1	1037	-7.47709e-07	639	3.18246e-05	1294	-0.0316406	1784	-5.53251	1487	-1.14504e-05	1476	-1.35341e-05	1804	-0.0144453	1804	-0.0144453
ZBTB3	899	1	977	1	913	1	1317	-1.21018e-05	1477	-4.67174e-05	911	-0.030227	527	-2.70764	1554	-2.07628e-05	1617	-3.84907e-05	1356	-0.0029068	1356	-0.0029068
ARNTL	899	1	526	0.432969	913	1	643	6.22933e-06	464	9.93757e-05	1649	-0.0328891	125	-1.35718	1598	-2.89782e-05	1543	-2.29617e-05	1878	-0.0216333	1878	-0.0216333
NEUROD1	899	1	977	1	913	1	1554	-7.8777e-05	1451	-3.6831e-05	1788	-0.0338197	854	-3.28953	1644	-3.80761e-05	1597	-3.25077e-05	1885	-0.0221543	1885	-0.0221543
PAX8	899	1	153	0.0377683	645	0.580846	232	9.57881e-05	269	0.000398148	1906	-0.0373604	64	-0.0471457	1320	-2.49445e-06	1268	-2.05265e-06	583	0.00181948	583	0.00181948
SPI1	899	1	977	1	913	1	617	7.44292e-06	240	0.000516677	1932	-0.0405606	1941	-10.9735	1448	-7.91599e-06	1357	-5.16716e-06	1594	-0.00695155	1594	-0.00695155
ZEB2	899	1	977	1	913	1	276	6.89831e-05	1391	-1.79582e-05	1873	-0.03502	1927	-8.57968	1476	-1.06708e-05	1429	-9.70609e-06	1727	-0.0108755	1727	-0.0108755
RBL1	899	1	531	0.434875	913	1	221	0.000104876	291	0.000326973	1467	-0.0321947	1742	-5.22448	1715	-7.23444e-05	1668	-5.84212e-05	1849	-0.0180832	1849	-0.0180832
PCGF1	899	1	334	0.208691	913	1	371	3.24659e-05	380	0.000188715	798	-0.0297782	931	-3.40748	1620	-3.25093e-05	1602	-3.33861e-05	1851	-0.0181208	1851	-0.0181208
H3K32ac	899	1	977	1	913	1	1400	-2.30364e-05	1620	-0.000189961	1454	-0.0321667	1050	-3.58677	1474	-1.06326e-05	1492	-1.53886e-05	1725	-0.0107959	1725	-0.0107959
CEBPB	899	1	401	0.284233	856	0.923283	1549	-7.43412e-05	230	0.000545835	217	-0.0234591	1921	-8.14472	1411	-5.80037e-06	1408	-7.83175e-06	1426	-0.00376412	1426	-0.00376412
GATA6	899	1	977	1	913	1	1623	-0.000130184	1554	-0.000103644	1329	-0.0317636	1147	-3.74085	1614	-3.18123e-05	1581	-3.06677e-05	1861	-0.0193608	1861	-0.0193608
MED12	899	1	977	1	913	1	1657	-0.000180078	1626	-0.000202716	950	-0.030378	1868	-6.51928	1646	-3.83926e-05	1655	-5.36542e-05	1806	-0.0146381	1806	-0.0146381
H3K23ac	899	1	471	0.369307	913	1	437	2.29635e-05	346	0.000235378	1155	-0.0312067	606	-2.86629	1394	-5.00722e-06	1402	-7.54406e-06	1548	-0.0058866	1548	-0.0058866
E4F1	899	1	717	0.668118	913	1	1579	-9.25914e-05	616	3.6282e-05	1250	-0.0315292	87	-0.891532	1524	-1.64466e-05	1508	-1.72636e-05	1337	-0.00263259	1337	-0.00263259
CSNK2A1	899	1	977	1	913	1	658	5.75363e-06	575	4.89708e-05	1417	-0.0320438	1437	-4.28959	1455	-8.68305e-06	1362	-5.41654e-06	1661	-0.008574	1661	-0.008574
PAX7	899	1	977	1	479	0.273109	1617	-0.000127864	1670	-0.000303848	1242	-0.0315052	983	-3.47858	337	8.33243e-06	298	5.47725e-06	632	0.00131478	632	0.00131478
UBP1	899	1	757	0.718159	747	0.742051	361	3.54957e-05	388	0.000172195	1806	-0.0339259	1864	-6.45255	1375	-4.29184e-06	1340	-4.10099e-06	686	0.000706127	686	0.000706127
PHIP	899	1	348	0.223411	913	1	202	0.000127357	395	0.00016347	947	-0.0303698	563	-2.78161	1581	-2.44175e-05	1565	-2.72899e-05	1769	-0.0128116	1769	-0.0128116
PLAG1	899	1	189	0.0569855	541	0.37778	348	4.00026e-05	673	2.40426e-05	451	-0.02731	624	-2.90578	1641	-3.66619e-05	1588	-3.15121e-05	1939	-0.0388892	1939	-0.0388892
BACH2	899	1	977	1	913	1	1323	-1.29151e-05	703	1.99688e-05	1503	-0.0322972	284	-2.11097	1555	-2.13313e-05	1555	-2.49204e-05	1702	-0.00982639	1702	-0.00982639
PRDM4	899	1	389	0.267238	913	1	417	2.50642e-05	538	6.22048e-05	1386	-0.031912	267	-2.0421	1603	-2.96047e-05	1526	-2.03697e-05	1923	-0.0293705	1923	-0.0293705
ZBTB43	899	1	509	0.416953	913	1	349	3.96938e-05	544	5.81049e-05	634	-0.0288469	1889	-7.02292	1485	-1.14022e-05	1484	-1.38733e-05	1677	-0.00907302	1677	-0.00907302
ZNF703	899	1	977	1	897	0.979022	1112	-2.25041e-06	1574	-0.000119656	1838	-0.0342506	789	-3.1659	1322	-2.5585e-06	1440	-1.05481e-05	455	0.00345493	455	0.00345493
GLI4	899	1	977	1	913	1	1514	-5.30793e-05	1594	-0.000150628	1430	-0.0320883	1831	-6.07022	1439	-7.13196e-06	1417	-8.85355e-06	1483	-0.00480972	1483	-0.00480972
KLF6	899	1	977	1	913	1	194	0.00014624	1643	-0.00023226	1913	-0.0379201	1371	-4.14932	1456	-8.79139e-06	1516	-1.87196e-05	1675	-0.00905329	1675	-0.00905329
ZFP2	899	1	245	0.0961948	913	1	224	0.000101652	373	0.000199701	305	-0.0252476	1819	-5.93508	1496	-1.26653e-05	1475	-1.35143e-05	1844	-0.017973	1844	-0.017973
ZNF784	899	1	977	1	913	1	1573	-8.92692e-05	1542	-9.03775e-05	1004	-0.0305962	821	-3.23299	1624	-3.26187e-05	1567	-2.77728e-05	1585	-0.00671442	1585	-0.00671442
DNMT1	899	1	977	1	318	0.044423	1276	-8.70664e-06	1459	-3.93443e-05	972	-0.030483	1643	-4.82804	382	3.29413e-06	340	2.50281e-06	409	0.00416188	409	0.00416188
HSF1	899	1	722	0.677592	913	1	329	4.54948e-05	375	0.000197608	1889	-0.0359259	1838	-6.13015	1565	-2.21599e-05	1573	-2.87438e-05	1841	-0.0175166	1841	-0.0175166
ZNF592	899	1	977	1	913	1	1560	-8.39629e-05	372	0.000203018	989	-0.0305475	1109	-3.67891	1331	-2.8226e-06	1270	-2.11217e-06	1055	-0.000555355	1055	-0.000555355
SNIP1	899	1	977	1	913	1	1651	-0.000170642	614	3.65176e-05	1845	-0.0343332	199	-1.79692	1629	-3.38245e-05	1621	-4.0665e-05	1579	-0.0064206	1579	-0.0064206
RCOR3	899	1	496	0.396129	842	0.88511	381	3.02282e-05	622	3.5165e-05	1697	-0.0331479	426	-2.50188	1416	-5.92593e-06	1409	-7.92596e-06	1232	-0.00164764	1232	-0.00164764
Pan lysine acetylation	899	1	781	0.749828	913	1	493	1.60132e-05	427	0.00012818	1500	-0.0322902	793	-3.17193	1492	-1.21577e-05	1439	-1.04753e-05	1765	-0.0126006	1765	-0.0126006
ZNF530	899	1	224	0.0855715	913	1	274	6.97584e-05	301	0.000311049	604	-0.0286358	745	-3.0964	1452	-8.27248e-06	1444	-1.08716e-05	1679	-0.00914181	1679	-0.00914181
H4K5bu	899	1	977	1	639	0.572276	1562	-8.44424e-05	1711	-0.000440924	1063	-0.0308379	1067	-3.61141	286	1.59089e-05	306	4.83055e-06	1554	-0.00592305	1554	-0.00592305
SOX11	899	1	460	0.353089	913	1	314	5.19437e-05	355	0.000225426	1351	-0.0318254	596	-2.83873	1432	-6.75543e-06	1384	-6.35083e-06	1674	-0.00903913	1674	-0.00903913
SIRT1	899	1	977	1	913	1	1561	-8.40735e-05	1588	-0.000144255	1110	-0.0310099	1304	-4.02509	1665	-4.42688e-05	1619	-3.94465e-05	1871	-0.0209537	1871	-0.0209537
ZKSCAN1	899	1	977	1	913	1	654	5.85584e-06	641	3.12343e-05	1709	-0.0332207	1594	-4.69459	1391	-4.79349e-06	1480	-1.37183e-05	1496	-0.00497227	1496	-0.00497227
TUBG1	899	1	345	0.219686	913	1	113	0.000357678	200	0.000773598	1489	-0.0322519	1666	-4.89396	1536	-1.83288e-05	1386	-6.4373e-06	1502	-0.00514576	1502	-0.00514576
RAG2	899	1	604	0.517356	714	0.697857	282	6.62883e-05	321	0.00027678	863	-0.0300455	1810	-5.79727	1346	-3.0621e-06	1361	-5.40824e-06	585	0.0017968	585	0.0017968
HLF	899	1	198	0.0644353	913	1	107	0.000381644	270	0.000396829	324	-0.0256338	840	-3.2718	1580	-2.42516e-05	1537	-2.14769e-05	1717	-0.0105248	1717	-0.0105248
DAXX	899	1	977	1	682	0.644278	1551	-7.60417e-05	1505	-6.43025e-05	1748	-0.0334454	392	-2.41964	1254	-1.15702e-06	1343	-4.26375e-06	499	0.0027844	499	0.0027844
TCF4	899	1	437	0.321347	913	1	165	0.000212691	246	0.000492607	1333	-0.0317792	1939	-10.7145	1735	-8.20024e-05	1718	-8.19203e-05	1279	-0.00208166	1279	-0.00208166
HOMEZ	899	1	270	0.119686	869	0.938931	403	2.75935e-05	165	0.00117413	361	-0.0262553	1863	-6.42562	1337	-2.9396e-06	1319	-3.2135e-06	952	-2.62211e-05	952	-2.62211e-05
ZBTB9	899	1	546	0.449718	913	1	1128	-2.64911e-06	429	0.000124854	917	-0.0302584	305	-2.17559	1463	-9.24589e-06	1418	-8.93329e-06	1619	-0.00767766	1619	-0.00767766
DCP1A	899	1	977	1	612	0.525129	1371	-1.80467e-05	527	6.82657e-05	982	-0.0305277	1823	-5.97403	453	7.90226e-07	1248	-1.65144e-06	980	-0.000121412	980	-0.000121412
ZNF791	899	1	977	1	913	1	396	2.83837e-05	496	8.27108e-05	1260	-0.0315568	1718	-5.12762	1525	-1.64797e-05	1487	-1.47474e-05	1722	-0.0107218	1722	-0.0107218
ZNF431	899	1	977	1	514	0.322985	1413	-2.45488e-05	1416	-2.36926e-05	1119	-0.0310555	1586	-4.68072	1197	-5.78781e-07	1115	-3.96631e-07	592	0.00172937	592	0.00172937
CERS6	899	1	977	1	913	1	343	4.13759e-05	1524	-7.89774e-05	1064	-0.0308417	1536	-4.53649	1557	-2.1385e-05	1579	-2.99137e-05	1327	-0.00254447	1327	-0.00254447
KDM3B	899	1	977	1	913	1	505	1.43587e-05	327	0.000268606	1214	-0.0314089	1609	-4.74999	1490	-1.16766e-05	1451	-1.14112e-05	1606	-0.00730637	1606	-0.00730637
CUX1	899	1	977	1	913	1	547	1.18332e-05	476	9.07038e-05	1714	-0.0332439	1335	-4.09532	1518	-1.56404e-05	1529	-2.11069e-05	1768	-0.0127614	1768	-0.0127614
SAFB2	899	1	977	1	423	0.165351	1469	-3.81388e-05	1647	-0.000239543	873	-0.0300872	1645	-4.83291	376	3.66989e-06	376	1.35981e-06	446	0.00361232	446	0.00361232
GLMP	899	1	977	1	693	0.661743	1210	-5.62709e-06	1606	-0.000164324	886	-0.0301446	182	-1.71148	1349	-3.32095e-06	1252	-1.75221e-06	1282	-0.00213119	1282	-0.00213119
ZNF556	899	1	240	0.0936535	913	1	189	0.000155359	224	0.000561452	762	-0.029575	744	-3.09594	1589	-2.59155e-05	1538	-2.16462e-05	1078	-0.000653019	1078	-0.000653019
NBN	899	1	977	1	913	1	1404	-2.34733e-05	1537	-8.73205e-05	841	-0.0299582	1038	-3.56261	1573	-2.31973e-05	1471	-1.32175e-05	1514	-0.00529341	1514	-0.00529341
POGZ	899	1	909	0.906988	913	1	173	0.000203855	446	0.000113113	930	-0.030308	1873	-6.58889	1599	-2.9014e-05	1575	-2.89844e-05	1744	-0.0118967	1744	-0.0118967
macroH2A2	899	1	268	0.114732	913	1	332	4.49664e-05	397	0.000160238	985	-0.0305338	243	-1.9663	1419	-6.07385e-06	1466	-1.28249e-05	1627	-0.00788985	1627	-0.00788985
ZNF816	899	1	476	0.37523	913	1	200	0.000135127	268	0.000405541	1488	-0.0322457	1255	-3.95154	1622	-3.25564e-05	1558	-2.51543e-05	1560	-0.00606062	1560	-0.00606062
GTF2H2	899	1	977	1	913	1	323	4.71931e-05	1619	-0.000189084	1018	-0.0306758	1383	-4.17326	1477	-1.06971e-05	1473	-1.32738e-05	471	0.00329347	471	0.00329347
ZNF142	899	1	977	1	626	0.554939	1425	-2.65737e-05	1485	-5.12507e-05	1705	-0.0331975	1803	-5.77755	394	2.73451e-06	1310	-2.98985e-06	598	0.00166839	598	0.00166839
GFI1B	899	1	743	0.705602	913	1	384	2.97879e-05	315	0.000289103	1528	-0.0323643	1872	-6.5747	1567	-2.25844e-05	1559	-2.54296e-05	1570	-0.00627164	1570	-0.00627164
ZHX3	899	1	977	1	913	1	1610	-0.000122875	1596	-0.000153466	1477	-0.0322119	1039	-3.56385	1751	-9.30394e-05	1680	-6.36465e-05	1838	-0.0172966	1838	-0.0172966
NFATC4	899	1	760	0.724914	913	1	1271	-8.14742e-06	448	0.000112972	818	-0.0298523	418	-2.47985	1636	-3.54485e-05	1623	-4.09859e-05	1789	-0.013928	1789	-0.013928
MLL-AF4	899	1	261	0.108745	913	1	388	2.91072e-05	465	9.91827e-05	791	-0.0297456	99	-1.16126	1444	-7.71296e-06	1459	-1.23609e-05	1562	-0.00611348	1562	-0.00611348
HOXC5	899	1	977	1	913	1	1443	-3.0277e-05	1312	-8.85345e-06	316	-0.0254657	479	-2.61748	1639	-3.65453e-05	1638	-4.66593e-05	1800	-0.0142572	1800	-0.0142572
H3K4ox	899	1	165	0.0450595	913	1	245	8.81934e-05	217	0.000634779	1923	-0.0388754	286	-2.1131	1585	-2.50544e-05	1561	-2.64407e-05	1749	-0.0119978	1749	-0.0119978
SPEN	899	1	977	1	913	1	268	7.29859e-05	1640	-0.000229653	1314	-0.0317156	1035	-3.55788	1745	-8.83834e-05	1695	-7.24359e-05	1766	-0.0126558	1766	-0.0126558
RFX2	899	1	965	0.985532	913	1	133	0.000295896	1851	-0.00237438	1695	-0.0331297	777	-3.15337	1862	-0.000279179	1835	-0.000231351	1431	-0.00387418	1431	-0.00387418
TCF21	899	1	977	1	913	1	1643	-0.000158051	1635	-0.000211858	1022	-0.0306879	1019	-3.52966	1655	-4.17842e-05	1630	-4.2721e-05	1476	-0.00452404	1476	-0.00452404
ZNF282	899	1	977	1	913	1	1262	-7.95065e-06	1482	-4.86983e-05	1234	-0.0314659	1343	-4.11231	1478	-1.07358e-05	1510	-1.74764e-05	1654	-0.00842117	1654	-0.00842117
SAP130	899	1	584	0.492681	913	1	422	2.43346e-05	478	9.02817e-05	1393	-0.0319337	675	-2.98771	1674	-4.79616e-05	1639	-4.71888e-05	737	0.000237019	737	0.000237019
ZNF426	899	1	670	0.61362	575	0.44744	313	5.20234e-05	354	0.00022633	1832	-0.0341635	1158	-3.76182	1716	-7.24733e-05	1523	-1.987e-05	1935	-0.035752	1935	-0.035752
KAT6A	899	1	367	0.240773	913	1	358	3.63861e-05	1458	-3.91684e-05	30	-0.00854927	1836	-6.11212	1670	-4.63454e-05	1504	-1.68038e-05	1738	-0.0114545	1738	-0.0114545
GABPB1	899	1	977	1	878	0.950797	1591	-0.00010574	249	0.000482831	1301	-0.0316539	707	-3.03197	1505	-1.38946e-05	1498	-1.62667e-05	365	0.00511041	365	0.00511041
E2F1	899	1	284	0.140811	913	1	427	2.39412e-05	341	0.000247976	351	-0.0260895	1059	-3.59876	1593	-2.76534e-05	1578	-2.96399e-05	1919	-0.0281355	1919	-0.0281355
NR2F2	899	1	977	1	913	1	1499	-4.66963e-05	1424	-2.82419e-05	1070	-0.0308803	275	-2.09071	1532	-1.75874e-05	1525	-2.0115e-05	1767	-0.0127313	1767	-0.0127313
SIPA1	899	1	977	1	913	1	1592	-0.000105828	1179	-2.12436e-06	1188	-0.0313304	823	-3.23384	1676	-4.89508e-05	1608	-3.60314e-05	1850	-0.0181051	1850	-0.0181051
ZMYM3	899	1	977	1	913	1	1642	-0.000156725	488	8.58746e-05	956	-0.0304084	1812	-5.8164	1466	-9.60049e-06	1460	-1.23738e-05	1672	-0.00893843	1672	-0.00893843
ZFP69B	899	1	977	1	913	1	1311	-1.15192e-05	1573	-0.000119351	415	-0.0269057	1012	-3.5228	1604	-2.9925e-05	1585	-3.13417e-05	1693	-0.00950718	1693	-0.00950718
ELL	899	1	113	0.0157537	913	1	295	6.16656e-05	272	0.000392653	429	-0.0270865	488	-2.63784	1347	-3.2432e-06	1387	-6.479e-06	1125	-0.000931821	1125	-0.000931821
SRPK1	899	1	542	0.445575	913	1	1480	-3.97895e-05	295	0.000321891	831	-0.0299086	279	-2.09925	1662	-4.31632e-05	1572	-2.87414e-05	1408	-0.00357135	1408	-0.00357135
FUBP1	899	1	977	1	913	1	1633	-0.000149703	1481	-4.84203e-05	573	-0.0284084	1876	-6.62736	1387	-4.67728e-06	1457	-1.22801e-05	1224	-0.00157965	1224	-0.00157965
H4K5K8K12K16ac	899	1	977	1	913	1	1327	-1.33686e-05	1667	-0.000298455	1068	-0.0308605	362	-2.34948	1691	-5.57694e-05	1607	-3.51116e-05	1709	-0.0100816	1709	-0.0100816
TRIM37	899	1	977	1	913	1	1459	-3.42599e-05	288	0.000331939	1576	-0.0325736	1495	-4.4237	383	3.22036e-06	1468	-1.29759e-05	1275	-0.00206366	1275	-0.00206366
GPS2	899	1	541	0.442891	913	1	294	6.22904e-05	245	0.000503663	1490	-0.0322524	1684	-4.96736	1558	-2.14671e-05	1544	-2.29676e-05	1708	-0.00995073	1708	-0.00995073
KDM4A	899	1	977	1	567	0.430093	1358	-1.56728e-05	593	4.36318e-05	735	-0.0294019	1604	-4.73797	1776	-0.000115974	1740	-9.99162e-05	1938	-0.038381	1938	-0.038381
DPF1	899	1	977	1	793	0.816199	1494	-4.62121e-05	1582	-0.000128653	1002	-0.0305934	355	-2.32587	1230	-8.44618e-07	1397	-7.14004e-06	1130	-0.000956081	1130	-0.000956081
MGMT	899	1	339	0.215957	913	1	279	6.65902e-05	467	9.6848e-05	881	-0.0301199	939	-3.41901	1653	-4.1022e-05	1605	-3.45304e-05	1778	-0.0134159	1778	-0.0134159
MLLT6	899	1	977	1	913	1	1521	-5.83287e-05	1427	-2.9737e-05	827	-0.0298936	850	-3.28657	1666	-4.44069e-05	187	2.83527e-05	1355	-0.00289095	1355	-0.00289095
NKX2-3	899	1	977	1	913	1	284	6.59535e-05	1567	-0.000111709	1010	-0.0306252	967	-3.46035	1469	-9.84121e-06	1311	-2.99873e-06	694	0.000626186	694	0.000626186
MSC	899	1	977	1	521	0.339517	247	8.78764e-05	1621	-0.000191613	928	-0.0303	1813	-5.85124	371	4.00338e-06	305	4.83723e-06	1026	-0.000354113	1026	-0.000354113
H3R2me2	899	1	977	1	913	1	1570	-8.7393e-05	503	7.98731e-05	1025	-0.0306974	1004	-3.51331	1471	-1.02258e-05	1464	-1.26077e-05	1555	-0.00598899	1555	-0.00598899
TLE3	899	1	859	0.857032	913	1	431	2.37338e-05	1561	-0.000106368	366	-0.0264315	1365	-4.14315	1547	-2.00365e-05	1518	-1.90885e-05	1729	-0.010985	1729	-0.010985
ZNF800	899	1	250	0.10021	913	1	109	0.000361443	211	0.000667112	549	-0.0282534	775	-3.15268	1699	-5.90879e-05	1661	-5.54481e-05	1821	-0.0159208	1821	-0.0159208
EMX1	899	1	264	0.110883	913	1	139	0.000276616	138	0.00190777	1866	-0.0348156	1234	-3.91191	1543	-1.94688e-05	1557	-2.51263e-05	1743	-0.0118255	1743	-0.0118255
MED16	899	1	934	0.947506	913	1	1070	-1.20521e-06	528	6.79476e-05	1359	-0.0318413	1003	-3.51242	1526	-1.663e-05	1515	-1.83841e-05	1734	-0.0113254	1734	-0.0113254
RBM34	899	1	977	1	403	0.145272	1569	-8.68176e-05	1655	-0.000264049	996	-0.0305711	1652	-4.85138	364	4.56079e-06	304	4.94132e-06	500	0.00277432	500	0.00277432
FOXF2	899	1	977	1	913	1	1245	-7.17565e-06	530	6.76585e-05	1790	-0.033821	668	-2.97083	1425	-6.37378e-06	1204	-9.52487e-07	988	-0.000165475	988	-0.000165475
ZNF565	899	1	450	0.340568	913	1	141	0.000271431	254	0.000468363	1595	-0.0326388	1773	-5.45139	1657	-4.25968e-05	1676	-6.14132e-05	1462	-0.00423151	1462	-0.00423151
FOSL1	899	1	928	0.942461	913	1	868	5.13053e-08	424	0.00013282	1585	-0.0325908	720	-3.0606	1459	-8.99324e-06	1427	-9.686e-06	1169	-0.00119289	1169	-0.00119289
STAT1	899	1	833	0.815573	913	1	1309	-1.14696e-05	633	3.29449e-05	1198	-0.0313791	1190	-3.83111	1602	-2.92982e-05	1563	-2.66652e-05	1802	-0.0143387	1802	-0.0143387
CDC45	899	1	977	1	913	1	1688	-0.000250099	1764	-0.000769639	943	-0.0303579	964	-3.45716	1631	-3.43543e-05	1599	-3.30789e-05	1261	-0.00190351	1261	-0.00190351
ZBTB42	899	1	977	1	913	1	1310	-1.15086e-05	1478	-4.74416e-05	672	-0.0291126	513	-2.68561	1661	-4.31363e-05	1634	-4.53868e-05	1854	-0.0187723	1854	-0.0187723
TEAD1	899	1	630	0.554623	913	1	1566	-8.63513e-05	1540	-8.9837e-05	334	-0.0257467	263	-2.02121	1688	-5.34504e-05	1703	-7.54811e-05	1823	-0.0160478	1823	-0.0160478
PRDM2	899	1	360	0.234136	913	1	207	0.000119157	102	0.0027697	1400	-0.0319534	1928	-8.64403	1630	-3.38773e-05	1598	-3.29573e-05	1572	-0.00629554	1572	-0.00629554
TEX10	899	1	977	1	913	1	1583	-9.46562e-05	309	0.000300618	1125	-0.0310754	712	-3.05145	1571	-2.31046e-05	1548	-2.42429e-05	1609	-0.00735226	1609	-0.00735226
BRD9	899	1	664	0.604647	913	1	198	0.000137039	351	0.000229646	1801	-0.0339034	1918	-8.05731	1621	-3.25454e-05	1604	-3.39611e-05	1564	-0.00613369	1564	-0.00613369
ZNF626	899	1	977	1	913	1	1619	-0.000128271	1834	-0.00192904	875	-0.0300878	1257	-3.96187	1732	-8.1184e-05	1646	-4.98172e-05	1021	-0.000322233	1021	-0.000322233
ZFP3	899	1	844	0.836697	695	0.672189	111	0.000359016	1808	-0.0012948	1208	-0.0313994	780	-3.15609	1702	-6.51758e-05	1493	-1.57768e-05	652	0.000986105	652	0.000986105
H3K79me2	899	1	640	0.572115	913	1	1553	-7.74695e-05	221	0.000591558	1096	-0.0309575	340	-2.2704	1829	-0.000183714	1847	-0.000290378	1779	-0.0134414	1779	-0.0134414
PDS5A	899	1	611	0.523032	913	1	175	0.0002012	323	0.000273017	924	-0.0302802	1238	-3.91557	1734	-8.18625e-05	1705	-7.64803e-05	1893	-0.0229526	1893	-0.0229526
MEF2B	899	1	977	1	913	1	1646	-0.000163964	1739	-0.000607039	1519	-0.0323485	1364	-4.14311	1802	-0.000147675	1775	-0.000131544	1872	-0.0209609	1872	-0.0209609
PAD2	899	1	440	0.329546	768	0.785049	212	0.000115486	435	0.000122239	1725	-0.0333041	581	-2.8103	1756	-9.79385e-05	1657	-5.49407e-05	1928	-0.0313114	1928	-0.0313114
SP140	899	1	977	1	913	1	373	3.24522e-05	1535	-8.66033e-05	1397	-0.0319446	1218	-3.88672	1667	-4.47529e-05	1665	-5.74564e-05	1812	-0.0152481	1812	-0.0152481
ZNF579	899	1	220	0.0837667	913	1	78	0.000612236	120	0.00246232	1922	-0.0387077	1850	-6.2779	1633	-3.45902e-05	1603	-3.37131e-05	1740	-0.011623	1740	-0.011623
BNC2	899	1	977	1	848	0.896421	1604	-0.0001182	1608	-0.000168681	724	-0.0293591	1293	-4.01379	1243	-9.94761e-07	1419	-8.95394e-06	625	0.00138942	625	0.00138942
PRDM14	899	1	977	1	299	0.0338726	1626	-0.000134048	1693	-0.000389332	1106	-0.0309958	1749	-5.27176	208	3.62539e-05	247	1.23387e-05	408	0.00416603	408	0.00416603
TFAP2B	899	1	977	1	913	1	1612	-0.00012576	1698	-0.000400947	1161	-0.0312201	1076	-3.62718	1659	-4.27859e-05	1556	-2.50803e-05	1903	-0.0251285	1903	-0.0251285
RELB	899	1	846	0.838235	913	1	534	1.23932e-05	1281	-6.81504e-06	1318	-0.0317373	447	-2.55565	1611	-3.09617e-05	1465	-1.27263e-05	1796	-0.0141372	1796	-0.0141372
TAZ	899	1	977	1	913	1	1637	-0.00015334	1571	-0.000116672	1648	-0.0328887	703	-3.02547	1681	-5.08255e-05	1570	-2.82327e-05	1613	-0.00751984	1613	-0.00751984
TFDP2	899	1	545	0.448126	913	1	1127	-2.58099e-06	330	0.000265632	741	-0.0294389	808	-3.20804	1583	-2.50255e-05	1381	-6.077e-06	1260	-0.00190331	1260	-0.00190331
CSTF3	899	1	977	1	913	1	1393	-2.16569e-05	358	0.000223832	1309	-0.0316755	1714	-5.11286	1216	-7.38831e-07	1379	-5.98224e-06	656	0.000933328	656	0.000933328
ZEB1	899	1	977	1	913	1	1644	-0.000161043	1675	-0.000323668	789	-0.0297444	475	-2.61134	1464	-9.38991e-06	341	2.44032e-06	1473	-0.00450365	1473	-0.00450365
PHF13	899	1	977	1	913	1	1605	-0.000118822	1493	-5.73901e-05	1220	-0.0314308	1151	-3.75118	1401	-5.47065e-06	1390	-6.53812e-06	1651	-0.00831044	1651	-0.00831044
TBPL1	899	1	322	0.196266	913	1	481	1.72097e-05	345	0.000236388	69	-0.0153237	1269	-3.98029	1551	-2.03702e-05	1446	-1.12849e-05	1104	-0.000792685	1104	-0.000792685
CBX3	899	1	977	1	913	1	1535	-6.66021e-05	1291	-7.10772e-06	340	-0.0258736	1306	-4.02781	1616	-3.19044e-05	1549	-2.42891e-05	1650	-0.00829025	1650	-0.00829025
ZBED5	899	1	977	1	913	1	1493	-4.59545e-05	1624	-0.000201856	1129	-0.0310847	711	-3.04848	1758	-9.82845e-05	1694	-7.16605e-05	1913	-0.0273478	1913	-0.0273478
SRSF7	899	1	977	1	913	1	1505	-5.1019e-05	1577	-0.000124162	446	-0.0272554	1381	-4.17193	1625	-3.27664e-05	1577	-2.91684e-05	1602	-0.00713172	1602	-0.00713172
H1.5	899	1	977	1	611	0.523952	1507	-5.1949e-05	1553	-0.000103057	1138	-0.0311224	1392	-4.19391	349	6.99692e-06	1388	-6.4874e-06	401	0.00429775	401	0.00429775
AR	899	1	977	1	807	0.834182	1658	-0.000185265	1700	-0.000405758	978	-0.0305161	216	-1.86548	1778	-0.000117127	1770	-0.000127323	1927	-0.0304581	1927	-0.0304581
ZNF695	899	1	977	1	913	1	1659	-0.000185762	1579	-0.000127273	1312	-0.0317019	1137	-3.72989	1458	-8.96885e-06	1426	-9.33781e-06	1332	-0.00259665	1332	-0.00259665
AHR	899	1	977	1	913	1	1414	-2.4641e-05	1453	-3.70689e-05	1075	-0.0308889	1849	-6.27332	1578	-2.36937e-05	1562	-2.65902e-05	1761	-0.0124206	1761	-0.0124206
ZNF396	899	1	977	1	913	1	1532	-6.52361e-05	313	0.000291794	1520	-0.0323492	1828	-6.0206	1507	-1.39825e-05	1519	-1.92029e-05	1008	-0.000233828	1008	-0.000233828
ZBTB44	899	1	592	0.503261	913	1	1550	-7.48428e-05	316	0.000284226	245	-0.0241706	1755	-5.30826	1683	-5.14295e-05	1689	-7.04015e-05	1657	-0.00849458	1657	-0.00849458
SUMO1	899	1	977	1	913	1	1002	-2.72597e-07	1580	-0.000127316	1322	-0.0317468	1614	-4.7597	218	3.38331e-05	1501	-1.65127e-05	1323	-0.00249668	1323	-0.00249668
ZNF232	899	1	846	0.838235	913	1	1318	-1.23367e-05	344	0.000237646	710	-0.0292765	942	-3.42356	1594	-2.84822e-05	1596	-3.24649e-05	696	0.000600248	696	0.000600248
PIAS4	899	1	238	0.0933007	832	0.873918	270	7.19794e-05	369	0.000207305	170	-0.0220802	1601	-4.72504	1378	-4.37014e-06	1413	-8.18708e-06	1322	-0.00249151	1322	-0.00249151
ZNF624	899	1	977	1	913	1	397	2.83036e-05	1729	-0.000541775	566	-0.0283612	1633	-4.8061	1626	-3.30253e-05	1611	-3.70033e-05	1759	-0.0123526	1759	-0.0123526
ZNF577	899	1	257	0.105984	913	1	179	0.000184355	384	0.00017942	386	-0.0266356	1131	-3.72023	1867	-0.000303907	1874	-0.000429773	1833	-0.0167703	1833	-0.0167703
RXRA	899	1	427	0.3119	913	1	205	0.000121809	242	0.000511446	862	-0.0300445	1674	-4.92777	1744	-8.66887e-05	1751	-0.000108123	1894	-0.0231704	1894	-0.0231704
CPSF2	899	1	977	1	852	0.911689	1158	-3.65252e-06	1614	-0.000181071	897	-0.0301715	898	-3.35965	1410	-5.7679e-06	1423	-9.14648e-06	1049	-0.000497796	1049	-0.000497796
TEF	899	1	424	0.309556	789	0.8127	241	9.08141e-05	184	0.000910467	1834	-0.0342077	1885	-6.95368	1396	-5.15575e-06	1380	-6.0467e-06	1058	-0.000576263	1058	-0.000576263
TRP47	899	1	977	1	913	1	1524	-5.9419e-05	287	0.000334369	1939	-0.0442681	1931	-9.33918	1813	-0.000159131	1795	-0.000159924	1859	-0.0190883	1859	-0.0190883
RBAK	899	1	977	1	913	1	1529	-6.43268e-05	1599	-0.000154689	682	-0.0291646	1278	-3.99782	1707	-6.89765e-05	1738	-9.74327e-05	1685	-0.00933616	1685	-0.00933616
ZNF219	899	1	977	1	913	1	1631	-0.000141607	1718	-0.000469668	1072	-0.0308857	658	-2.95182	1689	-5.36272e-05	1673	-6.01225e-05	1772	-0.0129155	1772	-0.0129155
ATF3	899	1	977	1	913	1	1683	-0.000241153	735	1.51908e-05	567	-0.0283634	1905	-7.51387	1682	-5.13099e-05	1613	-3.71718e-05	1701	-0.00981126	1701	-0.00981126
CASP3	899	1	977	1	574	0.446706	261	7.57256e-05	755	1.29145e-05	1492	-0.0322537	911	-3.37698	1574	-2.32298e-05	1631	-4.39928e-05	528	0.00242757	528	0.00242757
ZNF850	899	1	867	0.865391	913	1	283	6.60751e-05	1638	-0.000222465	839	-0.0299533	579	-2.80783	1514	-1.49735e-05	1540	-2.2009e-05	1485	-0.00482142	1485	-0.00482142
ZNF780A	899	1	230	0.0878201	913	1	123	0.000320116	99	0.0029149	1206	-0.0313937	1174	-3.80112	1591	-2.73895e-05	1576	-2.91107e-05	1495	-0.00495974	1495	-0.00495974
H3R26cit	899	1	977	1	913	1	1572	-8.8901e-05	1692	-0.000388533	808	-0.0298238	1429	-4.27397	1703	-6.5228e-05	1656	-5.39553e-05	1869	-0.020566	1869	-0.020566
CBFB	899	1	866	0.864159	913	1	1738	-0.000381917	1831	-0.00173101	115	-0.0196098	1672	-4.91622	1695	-5.66717e-05	1679	-6.32492e-05	1897	-0.0235856	1897	-0.0235856
ZNF157	899	1	977	1	913	1	1470	-3.81807e-05	234	0.000535224	804	-0.0298113	1414	-4.2374	1434	-6.78819e-06	1522	-1.96186e-05	1601	-0.00711121	1601	-0.00711121
GFI1	899	1	977	1	913	1	1461	-3.43891e-05	1277	-6.4444e-06	1031	-0.0307371	1422	-4.25057	1723	-7.70736e-05	1716	-8.13017e-05	1921	-0.0288907	1921	-0.0288907
TOP1	899	1	977	1	913	1	1639	-0.000154275	1533	-8.55999e-05	751	-0.0295097	864	-3.31315	1668	-4.49983e-05	1645	-4.94618e-05	1830	-0.0166797	1830	-0.0166797
RB1	899	1	977	1	913	1	1409	-2.40995e-05	1740	-0.000608154	1007	-0.0306179	1021	-3.53566	1529	-1.70995e-05	1534	-2.1334e-05	1290	-0.00222981	1290	-0.00222981
ADAR	899	1	977	1	913	1	1558	-8.2369e-05	637	3.2116e-05	532	-0.0281784	1117	-3.69526	1649	-3.94304e-05	1633	-4.45912e-05	1317	-0.00245997	1317	-0.00245997
TFDP1	899	1	977	1	913	1	192	0.000149209	535	6.45e-05	1744	-0.03341	897	-3.35871	1645	-3.82159e-05	1627	-4.19463e-05	1736	-0.0114073	1736	-0.0114073
ZBTB33	899	1	977	1	913	1	1422	-2.59118e-05	1439	-3.30686e-05	1681	-0.0330191	1521	-4.51398	1637	-3.60327e-05	1622	-4.06901e-05	1681	-0.00919442	1681	-0.00919442
ZNF317	899	1	414	0.298329	913	1	258	7.64399e-05	895	3.92408e-06	515	-0.0280345	1018	-3.52918	1696	-5.85044e-05	1729	-9.12356e-05	1905	-0.0253783	1905	-0.0253783
RBM22	899	1	977	1	335	0.058391	1684	-0.000242791	1704	-0.000418609	974	-0.030493	1481	-4.38255	264	2.00782e-05	246	1.245e-05	375	0.00480924	375	0.00480924
ZNF280B	899	1	977	1	913	1	1405	-2.35078e-05	1442	-3.38606e-05	1324	-0.0317487	1103	-3.66537	1768	-0.00010624	1754	-0.000110872	1826	-0.0161738	1826	-0.0161738
MEN1	899	1	977	1	913	1	1335	-1.3805e-05	1578	-0.000124665	1061	-0.0308352	662	-2.96007	1480	-1.10027e-05	1509	-1.73595e-05	1656	-0.00849393	1656	-0.00849393
ZBTB12	899	1	977	1	913	1	1582	-9.42521e-05	1755	-0.000673155	1162	-0.031222	1053	-3.58956	1818	-0.000164175	1799	-0.000164837	1790	-0.0139281	1790	-0.0139281
ZBTB49	899	1	977	1	913	1	1290	-1.00283e-05	1731	-0.000559841	1073	-0.0308872	1080	-3.63451	1519	-1.59533e-05	1550	-2.45255e-05	1534	-0.00563337	1534	-0.00563337
RBBP7	899	1	977	1	466	0.253833	1556	-8.05428e-05	525	7.0261e-05	1175	-0.0312852	826	-3.24716	258	2.14608e-05	196	2.54903e-05	1467	-0.00437631	1467	-0.00437631
TGIF2LX	899	1	977	1	913	1	639	6.45387e-06	1609	-0.000169144	948	-0.0303746	705	-3.02935	1749	-8.98736e-05	1722	-8.57584e-05	1847	-0.0180227	1847	-0.0180227
NFYA	899	1	977	1	913	1	1299	-1.0636e-05	1593	-0.000149831	1048	-0.0307934	1821	-5.94738	1380	-4.43472e-06	1450	-1.13789e-05	541	0.00225553	541	0.00225553
RARA	899	1	977	1	913	1	1628	-0.000135232	1495	-5.95394e-05	1221	-0.0314324	1658	-4.8751	1634	-3.49764e-05	1545	-2.34031e-05	1003	-0.000212327	1003	-0.000212327
GMEB2	899	1	571	0.480993	913	1	269	7.26394e-05	1695	-0.000398185	1255	-0.0315377	308	-2.18704	1632	-3.44532e-05	1615	-3.79328e-05	1697	-0.00963618	1697	-0.00963618
NLRP2	899	1	977	1	432	0.180134	1701	-0.000287191	155	0.0014151	931	-0.0303116	1670	-4.90923	251	2.30945e-05	245	1.25093e-05	1086	-0.000685971	1086	-0.000685971
ZNF583	899	1	977	1	913	1	1576	-9.05836e-05	1466	-4.09476e-05	1083	-0.030903	610	-2.87689	1523	-1.63824e-05	1521	-1.93211e-05	1258	-0.00189426	1258	-0.00189426
ZMAT4	899	1	298	0.162209	913	1	135	0.000292096	170	0.001141	630	-0.0287994	1509	-4.45903	1686	-5.31073e-05	1670	-5.93471e-05	1742	-0.0116844	1742	-0.0116844
MNX1	899	1	977	1	507	0.319098	1678	-0.000216849	1696	-0.000398794	1105	-0.0309957	1535	-4.53608	1453	-8.36167e-06	216	1.92815e-05	313	0.00629444	313	0.00629444
ZNF660	899	1	977	1	913	1	1567	-8.6576e-05	1677	-0.000333926	471	-0.0275866	1597	-4.711	1742	-8.66583e-05	1732	-9.24764e-05	1910	-0.0269687	1910	-0.0269687
CGGBP1	899	1	977	1	913	1	1491	-4.5136e-05	1668	-0.000299378	1109	-0.0310078	628	-2.90783	1493	-1.23695e-05	1547	-2.34602e-05	1129	-0.000940513	1129	-0.000940513
CREB3	899	1	725	0.679012	913	1	763	1.78713e-06	151	0.00150558	1497	-0.0322656	417	-2.47781	1548	-2.01504e-05	1697	-7.29674e-05	1575	-0.00633825	1575	-0.00633825
H3S10ph	899	1	336	0.21361	913	1	171	0.000206703	197	0.000781563	1146	-0.0311606	1442	-4.29694	1770	-0.000110665	1739	-9.77951e-05	1728	-0.0109337	1728	-0.0109337
C11orf53	899	1	977	1	913	1	244	8.97218e-05	1672	-0.000313038	582	-0.0284522	927	-3.40317	1403	-5.59429e-06	1470	-1.3212e-05	720	0.000386812	720	0.000386812
ZBED4	899	1	977	1	913	1	1758	-0.000489198	1822	-0.0016033	767	-0.0295936	547	-2.73741	1628	-3.36384e-05	1863	-0.000348945	1699	-0.00978276	1699	-0.00978276
ELK4	899	1	210	0.0734143	913	1	336	4.32389e-05	454	0.000110351	717	-0.0293269	249	-1.98651	1615	-3.18858e-05	1592	-3.21068e-05	1573	-0.00631189	1573	-0.00631189
ZNF576	899	1	977	1	913	1	1555	-7.90842e-05	1604	-0.000159779	891	-0.030157	1590	-4.69069	1544	-1.95267e-05	1503	-1.66532e-05	1584	-0.00665468	1584	-0.00665468
NR2C2	899	1	977	1	913	1	1557	-8.05899e-05	1752	-0.00066429	1092	-0.0309441	1627	-4.79448	1801	-0.000146906	1774	-0.000131057	1794	-0.0140759	1794	-0.0140759
ZMYM2	899	1	977	1	913	1	1577	-9.09939e-05	1637	-0.000220066	1049	-0.0307984	1532	-4.53083	1724	-7.77047e-05	1675	-6.07591e-05	1692	-0.00946413	1692	-0.00946413
TAF5L	899	1	977	1	913	1	1608	-0.00012156	1762	-0.000739536	787	-0.0297218	1595	-4.70151	1709	-6.91996e-05	1782	-0.000138593	1785	-0.0137137	1785	-0.0137137
NFKB1	899	1	977	1	394	0.131877	1503	-4.91147e-05	1687	-0.000375334	521	-0.0280687	1181	-3.81241	333	8.58435e-06	308	4.65126e-06	1031	-0.000387651	1031	-0.000387651
ZC3H11A	899	1	495	0.393035	913	1	1382	-1.94925e-05	275	0.000390479	244	-0.024145	1839	-6.1329	1521	-1.607e-05	1517	-1.87598e-05	1521	-0.00542764	1521	-0.00542764
OTX2	899	1	977	1	913	1	1447	-3.12709e-05	1659	-0.000270762	759	-0.0295713	1566	-4.61894	1871	-0.000324496	1833	-0.00021549	1908	-0.0259259	1908	-0.0259259
IRF2	899	1	977	1	913	1	1602	-0.00011443	1390	-1.77077e-05	824	-0.0298734	1644	-4.82813	1694	-5.66687e-05	1650	-5.23497e-05	1605	-0.00723048	1605	-0.00723048
CPSF1	899	1	699	0.644979	913	1	469	1.85706e-05	1763	-0.000745633	748	-0.0295024	637	-2.91928	1660	-4.28136e-05	1663	-5.59421e-05	1484	-0.00481253	1484	-0.00481253
NUFIP1	899	1	977	1	913	1	1584	-9.58765e-05	1634	-0.000211177	905	-0.0302044	228	-1.9078	1652	-4.01796e-05	1629	-4.22949e-05	1349	-0.00282348	1349	-0.00282348
MORC2	899	1	977	1	913	1	1565	-8.54043e-05	214	0.000646185	1901	-0.0367745	1847	-6.24449	1601	-2.92931e-05	1589	-3.1931e-05	1630	-0.00793373	1630	-0.00793373
TOX4	899	1	319	0.190026	913	1	185	0.000161437	150	0.00157081	1432	-0.032111	1888	-7.00637	1720	-7.446e-05	1666	-5.82112e-05	1587	-0.00676036	1587	-0.00676036
NFE2L1	899	1	429	0.31661	913	1	1445	-3.10929e-05	244	0.000504505	689	-0.0291953	159	-1.57078	1842	-0.00021951	1808	-0.000173181	1803	-0.0144097	1803	-0.0144097
FOXA3	899	1	977	1	913	1	1734	-0.000377435	1511	-6.75813e-05	857	-0.0300177	915	-3.38891	1613	-3.18031e-05	1700	-7.46742e-05	1898	-0.0237211	1898	-0.0237211
ZNF569	899	1	977	1	913	1	465	1.96781e-05	1686	-0.000374001	1265	-0.0315679	731	-3.07636	1878	-0.000357338	1859	-0.00032674	1517	-0.00533027	1517	-0.00533027
ERCC8	899	1	318	0.186209	913	1	108	0.000367137	183	0.000914462	1210	-0.0314019	1406	-4.22599	1595	-2.86111e-05	1593	-3.21478e-05	639	0.00122548	639	0.00122548
ZNF580	899	1	483	0.382823	913	1	191	0.000149913	1806	-0.00121472	740	-0.0294327	271	-2.0632	1618	-3.21825e-05	1583	-3.07969e-05	1430	-0.00386974	1430	-0.00386974
H2BK15ac	899	1	977	1	913	1	1423	-2.60042e-05	1681	-0.00033996	783	-0.029712	1476	-4.37041	1750	-9.14395e-05	1710	-7.91826e-05	1877	-0.0213975	1877	-0.0213975
GRHL2	899	1	977	1	913	1	1527	-6.36935e-05	1728	-0.000538577	744	-0.029477	318	-2.21386	1769	-0.000109924	1744	-0.000103301	1748	-0.0119738	1748	-0.0119738
PIAS1	899	1	977	1	913	1	1598	-0.000113012	1771	-0.000820242	923	-0.0302781	1008	-3.51655	1635	-3.51946e-05	1674	-6.06314e-05	1700	-0.00979948	1700	-0.00979948
H3K9me3	899	1	977	1	780	0.801469	1754	-0.000442445	1797	-0.00115048	563	-0.0283444	848	-3.2822	1875	-0.000342443	1849	-0.000298058	1929	-0.0324034	1929	-0.0324034
H3K9me2	899	1	977	1	913	1	1669	-0.000204789	1777	-0.000881232	815	-0.0298437	169	-1.63905	1812	-0.000158494	1780	-0.000133933	1827	-0.0162885	1827	-0.0162885
RBM25	899	1	977	1	913	1	346	4.00513e-05	1570	-0.000115675	1081	-0.0308997	1455	-4.31443	1827	-0.000181213	1800	-0.000165019	1776	-0.0133042	1776	-0.0133042
SCRT1	899	1	977	1	913	1	1601	-0.000114212	1597	-0.000153915	607	-0.0286681	1598	-4.71353	360	5.09017e-06	1507	-1.71828e-05	1706	-0.00993957	1706	-0.00993957
ARID4A	899	1	977	1	913	1	1728	-0.000362299	1736	-0.000586289	980	-0.0305247	1425	-4.26056	1775	-0.000115144	1755	-0.000112387	1604	-0.00722197	1604	-0.00722197
ZSCAN18	899	1	514	0.419002	913	1	285	6.58644e-05	1671	-0.000312738	161	-0.0218935	1112	-3.68543	1763	-0.000101908	1746	-0.000104588	1891	-0.022602	1891	-0.022602
HNF1B	899	1	977	1	913	1	1693	-0.000260047	1656	-0.000267916	871	-0.0300832	762	-3.12281	1822	-0.000172877	1831	-0.000214422	1906	-0.0257216	1906	-0.0257216
INTS13	899	1	977	1	913	1	1593	-0.000107757	1632	-0.000209321	723	-0.0293588	650	-2.94098	1731	-8.06332e-05	1719	-8.24636e-05	1886	-0.0221735	1886	-0.0221735
ZNF446	899	1	977	1	913	1	1640	-0.000154339	550	5.59898e-05	1277	-0.0315978	683	-2.99656	1693	-5.65877e-05	1671	-5.94897e-05	1446	-0.00410776	1446	-0.00410776
ZNF788	899	1	977	1	913	1	1614	-0.000126955	195	0.000794242	1030	-0.0307362	1895	-7.1227	1608	-3.08424e-05	1542	-2.25943e-05	1377	-0.0031777	1377	-0.0031777
GMEB1	899	1	977	1	913	1	1594	-0.000109189	540	6.12861e-05	753	-0.0295257	1363	-4.14245	1784	-0.000127148	1788	-0.000143722	1815	-0.0153692	1815	-0.0153692
L3MBTL3	899	1	663	0.603201	913	1	1485	-4.31096e-05	539	6.13158e-05	454	-0.027403	729	-3.07421	1669	-4.51631e-05	1651	-5.26332e-05	1509	-0.00524419	1509	-0.00524419
FOXO3	899	1	343	0.217653	913	1	150	0.000252788	199	0.000773648	1283	-0.0316116	622	-2.90085	1717	-7.28482e-05	1653	-5.3077e-05	1814	-0.015338	1814	-0.015338
ELF3	899	1	217	0.0789982	913	1	187	0.000158523	348	0.000233663	241	-0.0240664	1808	-5.78708	1687	-5.33412e-05	1662	-5.59406e-05	1620	-0.0076954	1620	-0.0076954
USP7	899	1	907	0.905016	913	1	1653	-0.000172283	1475	-4.61956e-05	121	-0.0199848	1572	-4.64663	1796	-0.000142749	1766	-0.000122672	1820	-0.015899	1820	-0.015899
ZNF772	899	1	977	1	913	1	1511	-5.2704e-05	1657	-0.000267934	840	-0.0299569	474	-2.60923	1623	-3.25954e-05	1566	-2.75998e-05	1308	-0.00235529	1308	-0.00235529
H2BK20ac	899	1	635	0.563346	913	1	197	0.000141013	337	0.000254275	1443	-0.0321546	1912	-7.78391	1793	-0.000138337	1752	-0.000108916	1883	-0.0220931	1883	-0.0220931
JMJD1C	899	1	977	1	753	0.752077	1672	-0.000209035	1727	-0.000521919	794	-0.0297537	605	-2.86509	1837	-0.000205001	1818	-0.000192781	1931	-0.0334219	1931	-0.0334219
H3.5	899	1	337	0.213681	913	1	145	0.000267268	218	0.00062223	496	-0.0278332	1829	-6.05044	1714	-7.1762e-05	1649	-5.22323e-05	1239	-0.00173794	1239	-0.00173794
OVOL3	899	1	977	1	913	1	1641	-0.000155278	227	0.000552664	1504	-0.0322993	1233	-3.91185	1362	-3.73729e-06	1524	-1.99123e-05	1662	-0.0085906	1662	-0.0085906
ZXDC	899	1	220	0.0837667	913	1	118	0.000348025	1689	-0.000380299	120	-0.0199628	959	-3.44886	1739	-8.54155e-05	1690	-7.04413e-05	1698	-0.00973333	1698	-0.00973333
ZNF792	899	1	977	1	913	1	286	6.54846e-05	1650	-0.000246766	705	-0.0292578	1649	-4.83948	1810	-0.000157318	1748	-0.000106927	1720	-0.0105878	1720	-0.0105878
ZMIZ1	899	1	235	0.0902593	913	1	755	1.96496e-06	208	0.000681202	540	-0.0282087	463	-2.59142	1830	-0.000183968	1776	-0.000131564	1770	-0.012819	1770	-0.012819
ZNF572	899	1	977	1	721	0.705213	1711	-0.000325426	283	0.000363449	1942	-0.0449767	1940	-10.9107	1183	-4.65371e-07	1496	-1.60388e-05	582	0.00182472	582	0.00182472
TWIST1	899	1	977	1	913	1	1723	-0.000352057	1712	-0.000444411	514	-0.0280313	583	-2.81537	1577	-2.3673e-05	1590	-3.20526e-05	1480	-0.00468665	1480	-0.00468665
TOP2A	899	1	825	0.802116	913	1	106	0.000386988	1581	-0.000127445	1747	-0.0334361	833	-3.26332	1679	-5.06278e-05	1711	-7.93344e-05	1381	-0.00327752	1381	-0.00327752
MBD6	899	1	977	1	913	1	1718	-0.000344554	1817	-0.00146458	697	-0.0292343	851	-3.28684	1658	-4.27029e-05	1771	-0.00012733	1694	-0.00952755	1694	-0.00952755
PCGF6	899	1	355	0.229127	913	1	186	0.000159312	450	0.000112326	788	-0.0297435	953	-3.44193	1596	-2.86662e-05	1640	-4.72048e-05	1690	-0.00945219	1690	-0.00945219
ZNF441	899	1	977	1	913	1	1648	-0.000167829	1747	-0.00063778	878	-0.0301066	1297	-4.02081	1553	-2.06203e-05	1681	-6.37467e-05	1447	-0.00411371	1447	-0.00411371
CLOCK	899	1	977	1	690	0.652996	1704	-0.000292462	390	0.000169223	714	-0.0292931	1474	-4.3604	1792	-0.000135763	1797	-0.000162535	331	0.00584589	331	0.00584589
PARP1	899	1	321	0.19386	913	1	316	5.04177e-05	577	4.87009e-05	914	-0.030245	441	-2.54217	1712	-7.11331e-05	1652	-5.26783e-05	1721	-0.0106375	1721	-0.0106375
H3K36ac	899	1	722	0.677592	913	1	1774	-0.000599911	1811	-0.0013363	375	-0.0265228	371	-2.37196	1873	-0.000329298	1842	-0.000256817	1881	-0.0217605	1881	-0.0217605
RNF219	899	1	487	0.385945	913	1	616	7.45243e-06	1584	-0.000132481	420	-0.0269545	545	-2.73471	1729	-8.01054e-05	1632	-4.41518e-05	1333	-0.00260185	1333	-0.00260185
MRE11A	899	1	977	1	913	1	1500	-4.84012e-05	1445	-3.57263e-05	700	-0.0292451	1224	-3.89917	1721	-7.51889e-05	1734	-9.33503e-05	1680	-0.00915119	1680	-0.00915119
ZBTB48	899	1	977	1	913	1	1671	-0.000208762	1788	-0.00102897	439	-0.0271313	1855	-6.30746	1808	-0.000155224	1802	-0.000167883	1664	-0.00863841	1664	-0.00863841
H4K91ac	899	1	977	1	913	1	1797	-0.000785789	1855	-0.00252748	390	-0.0266951	770	-3.1448	1727	-7.83725e-05	1725	-8.81082e-05	1530	-0.00560743	1530	-0.00560743
PTEN	899	1	977	1	913	1	1629	-0.000139401	1701	-0.000412156	593	-0.0284982	1443	-4.29819	1719	-7.3655e-05	1692	-7.06478e-05	1839	-0.0173411	1839	-0.0173411
SIRT7	899	1	146	0.0316526	913	1	398	2.8203e-05	113	0.00255176	581	-0.0284498	84	-0.774177	1755	-9.73881e-05	1709	-7.90527e-05	1216	-0.00152701	1216	-0.00152701
SMARCE1	899	1	977	1	913	1	1746	-0.000403853	1758	-0.000687992	558	-0.0283121	1295	-4.01944	1713	-7.14448e-05	1811	-0.000176736	1412	-0.00364184	1412	-0.00364184
Cas9	899	1	977	1	913	1	1647	-0.000167702	1818	-0.00147374	341	-0.0258864	1222	-3.89306	1704	-6.5554e-05	1706	-7.73599e-05	1683	-0.00920575	1683	-0.00920575
ZBTB38	899	1	977	1	913	1	1663	-0.000197216	1769	-0.000801197	370	-0.0264675	890	-3.35	1706	-6.73527e-05	1667	-5.82328e-05	1888	-0.0223151	1888	-0.0223151
RAG1	899	1	977	1	839	0.882928	1735	-0.000378553	1794	-0.00110126	556	-0.0282934	904	-3.37141	1887	-0.000432874	1880	-0.000471329	1926	-0.0303835	1926	-0.0303835
TSC22D2	899	1	977	1	559	0.412701	1552	-7.62733e-05	187	0.000865628	967	-0.0304462	1591	-4.69101	1743	-8.66641e-05	1909	-0.000938504	1912	-0.0271747	1912	-0.0271747
H4K8ac	899	1	977	1	913	1	1804	-0.000866065	1830	-0.00168671	631	-0.028816	1814	-5.86732	221	3.18081e-05	1601	-3.33737e-05	1640	-0.00812028	1640	-0.00812028
MTF2	899	1	977	1	913	1	1761	-0.000505925	1792	-0.00105924	589	-0.0284698	841	-3.27254	1895	-0.000517109	1868	-0.000397041	1842	-0.0176006	1842	-0.0176006
ELK3	899	1	952	0.972223	913	1	131	0.000297753	1583	-0.000129949	591	-0.0284837	1312	-4.04501	1826	-0.000180365	1801	-0.000165817	1421	-0.00372627	1421	-0.00372627
ZNF180	899	1	977	1	913	1	1665	-0.000200056	1734	-0.000576716	834	-0.0299262	796	-3.17727	1511	-1.41555e-05	1691	-7.04714e-05	1320	-0.00247421	1320	-0.00247421
ATXN7L3	899	1	290	0.151205	913	1	172	0.00020546	145	0.00177856	438	-0.0271309	1549	-4.56128	1737	-8.42484e-05	1678	-6.2599e-05	1199	-0.00142861	1199	-0.00142861
TP73	899	1	977	1	913	1	1713	-0.000330091	1721	-0.000506656	423	-0.0269927	1739	-5.20766	1848	-0.000229049	1812	-0.000177129	1735	-0.0113678	1735	-0.0113678
ZNF391	899	1	977	1	913	1	1696	-0.000272455	1625	-0.000202213	538	-0.0282072	638	-2.92319	1656	-4.18479e-05	1658	-5.5e-05	1576	-0.00633889	1576	-0.00633889
VDR	899	1	403	0.288106	913	1	239	9.19697e-05	317	0.000283535	553	-0.0282811	1362	-4.1424	1610	-3.09472e-05	1536	-2.13744e-05	1076	-0.000645151	1076	-0.000645151
PRKCQ	899	1	977	1	913	1	256	7.75727e-05	1891	-0.00461652	711	-0.029283	1412	-4.23589	1711	-7.0934e-05	1708	-7.8399e-05	1901	-0.0249321	1901	-0.0249321
HMGB2	899	1	977	1	913	1	1729	-0.000366732	1633	-0.000209758	317	-0.0254812	646	-2.93632	1673	-4.74902e-05	1683	-6.52233e-05	1475	-0.00451292	1475	-0.00451292
H3K122ac	899	1	977	1	913	1	1518	-5.65555e-05	1754	-0.000670865	554	-0.0282852	445	-2.54801	1733	-8.17647e-05	1758	-0.00011361	1757	-0.0123161	1757	-0.0123161
NR2E1	899	1	627	0.551725	913	1	1526	-6.06382e-05	333	0.000262879	332	-0.0257312	1159	-3.76215	1549	-2.01762e-05	1612	-3.71491e-05	1452	-0.00413622	1452	-0.00413622
SMAD5	899	1	977	1	913	1	1600	-0.000113861	1746	-0.000635011	267	-0.0246267	1640	-4.82359	1654	-4.11545e-05	1618	-3.91728e-05	1384	-0.00333109	1384	-0.00333109
ARNT	899	1	977	1	913	1	1726	-0.000358095	1782	-0.000918517	621	-0.028755	1142	-3.7376	1782	-0.000126148	1809	-0.000173921	1629	-0.00792093	1629	-0.00792093
H3K30ac	899	1	977	1	830	0.870213	1395	-2.23058e-05	1569	-0.000113322	449	-0.0272729	941	-3.42251	1412	-5.80537e-06	303	5.17145e-06	1315	-0.00241681	1315	-0.00241681
SP1	899	1	977	1	913	1	1512	-5.29156e-05	237	0.000523267	1551	-0.0324479	1488	-4.3983	1700	-6.14653e-05	1762	-0.000117954	1658	-0.00850665	1658	-0.00850665
RUNX3	899	1	948	0.967838	694	0.668889	1810	-0.000940841	1767	-0.000783441	315	-0.0254638	464	-2.59323	1897	-0.000568408	1890	-0.000562461	1934	-0.0352199	1934	-0.0352199
GATAD1	899	1	977	1	913	1	1580	-9.33917e-05	493	8.32497e-05	867	-0.0300602	1368	-4.1448	1845	-0.000224993	1824	-0.00020772	1902	-0.0250153	1902	-0.0250153
CTBP1	899	1	977	1	913	1	1773	-0.000598247	1776	-0.000869521	491	-0.0278027	1479	-4.37879	1788	-0.000134407	1726	-8.81338e-05	1546	-0.00588238	1546	-0.00588238
HSF4	899	1	338	0.215628	913	1	1611	-0.000124548	193	0.000814866	198	-0.0231192	968	-3.46122	1423	-6.36765e-06	1756	-0.000112616	1115	-0.000883635	1115	-0.000883635
ZNF266	899	1	977	1	913	1	1777	-0.00061341	1766	-0.000774236	542	-0.028214	1161	-3.76432	282	1.66752e-05	1737	-9.64647e-05	1442	-0.0040816	1442	-0.0040816
PHF20L1	899	1	977	1	385	0.119356	1479	-3.94765e-05	1660	-0.000271046	599	-0.0285862	1550	-4.56417	156	7.90669e-05	214	1.95452e-05	1014	-0.000257266	1014	-0.000257266
Hepatitis B Virus X antigen	899	1	887	0.88692	913	1	254	7.91597e-05	1719	-0.000478414	440	-0.0271521	1353	-4.12823	1773	-0.000113675	1779	-0.000133037	1646	-0.00818357	1646	-0.00818357
KDM6A	899	1	977	1	913	1	1689	-0.000255039	1845	-0.0022252	671	-0.0290965	1799	-5.74056	1627	-3.32578e-05	1620	-4.03756e-05	1553	-0.0059224	1553	-0.0059224
H3K4me	899	1	398	0.281047	913	1	485	1.65923e-05	1627	-0.000205413	548	-0.0282435	485	-2.631	1708	-6.89771e-05	1728	-8.90393e-05	1752	-0.0121792	1752	-0.0121792
ZNF296	899	1	977	1	913	1	1748	-0.000416603	1795	-0.00111645	899	-0.030175	382	-2.40537	1809	-0.000157117	1791	-0.000154052	489	0.00299867	489	0.00299867
HHV UL87	899	1	977	1	413	0.150035	1664	-0.000199568	1787	-0.000993761	806	-0.0298152	961	-3.45156	165	7.08234e-05	354	2.0315e-06	1626	-0.00786698	1626	-0.00786698
RAD51	899	1	977	1	913	1	1747	-0.00040495	1838	-0.00209315	353	-0.0261249	1351	-4.12607	1650	-3.94629e-05	1564	-2.67581e-05	1156	-0.00110633	1156	-0.00110633
H2Aub	899	1	977	1	760	0.77056	1739	-0.000391666	1630	-0.00020879	453	-0.0273579	529	-2.71005	1791	-0.000135565	1805	-0.000168827	611	0.00156735	611	0.00156735
ZNF432	899	1	620	0.543063	913	1	1762	-0.000511696	1779	-0.000889168	330	-0.025719	327	-2.23151	1685	-5.25573e-05	1637	-4.65569e-05	1183	-0.00133269	1183	-0.00133269
DOT1L	899	1	977	1	913	1	1682	-0.000230921	1803	-0.00118926	474	-0.0276207	1228	-3.90469	1889	-0.000460676	1875	-0.000429915	1857	-0.0188904	1857	-0.0188904
MAFB	899	1	893	0.890257	913	1	1813	-0.000976218	1861	-0.00280105	441	-0.027171	285	-2.1127	1901	-0.000624028	1892	-0.000597618	1828	-0.0164341	1828	-0.0164341
SFPQ	899	1	977	1	913	1	1625	-0.000133028	1878	-0.00355242	590	-0.0284806	287	-2.12536	1803	-0.000149182	1815	-0.000181591	1884	-0.0221525	1884	-0.0221525
HNRNPK	899	1	784	0.759414	877	0.947327	1756	-0.00047817	1497	-6.14613e-05	401	-0.026761	300	-2.16663	1915	-0.000823353	1882	-0.000481587	1916	-0.0278103	1916	-0.0278103
H3K9Kac	899	1	977	1	913	1	1703	-0.000292413	1789	-0.00104102	467	-0.0275677	1786	-5.56541	1894	-0.000506573	1871	-0.000418773	1642	-0.00813424	1642	-0.00813424
HNF4A	899	1	977	1	913	1	1744	-0.000402012	1814	-0.00141593	417	-0.0269365	1263	-3.97203	1777	-0.000116512	1759	-0.00011399	1799	-0.0142036	1799	-0.0142036
ZNF334	899	1	977	1	426	0.167578	1848	-0.00171354	1821	-0.00158181	381	-0.0265828	817	-3.22656	155	8.1145e-05	285	7.21918e-06	1073	-0.00062826	1073	-0.00062826
ZNF33A	899	1	922	0.932032	913	1	1861	-0.00203045	125	0.00235655	501	-0.0278874	1382	-4.17278	150	8.66349e-05	1768	-0.000125147	1140	-0.000986084	1140	-0.000986084
ZNF329	899	1	977	1	913	1	1454	-3.30694e-05	1674	-0.000321955	300	-0.0251604	1243	-3.91955	1701	-6.3851e-05	1641	-4.79975e-05	1557	-0.00601428	1557	-0.00601428
O-GlcNAc	899	1	977	1	464	0.251443	1771	-0.000581753	1772	-0.000834998	550	-0.0282542	1530	-4.52712	210	3.56012e-05	160	4.47619e-05	1404	-0.00350666	1404	-0.00350666
ZNF609	899	1	977	1	913	1	1695	-0.00026586	1820	-0.00155696	1785	-0.0338037	354	-2.32491	1664	-4.36877e-05	1720	-8.41719e-05	1321	-0.00247919	1321	-0.00247919
BCL11B	899	1	977	1	913	1	1793	-0.000758389	1510	-6.73202e-05	219	-0.0234981	1665	-4.89157	1846	-0.00022655	1763	-0.00012025	518	0.00258615	518	0.00258615
ETV6	899	1	977	1	913	1	1751	-0.000433461	1765	-0.000772044	533	-0.0281815	693	-3.00569	1893	-0.000505982	1878	-0.000452155	1875	-0.0213029	1875	-0.0213029
NKX2-2	899	1	977	1	913	1	1666	-0.000200939	1783	-0.000925486	473	-0.0275998	839	-3.27147	1858	-0.00026569	1844	-0.000271995	1458	-0.00419513	1458	-0.00419513
ERCC6	899	1	977	1	725	0.715304	1778	-0.000618624	1825	-0.00164012	214	-0.0234277	857	-3.30186	1759	-9.89182e-05	1860	-0.00033182	685	0.000721555	685	0.000721555
NPAS2	899	1	977	1	913	1	1546	-7.16481e-05	1694	-0.000391608	304	-0.0252253	1333	-4.09191	1856	-0.00025916	1827	-0.000209616	1867	-0.020078	1867	-0.020078
SMCHD1	899	1	445	0.333972	913	1	1795	-0.000769717	42	0.00917353	377	-0.0265413	589	-2.82426	1725	-7.78206e-05	1807	-0.000171501	1525	-0.0054565	1525	-0.0054565
EBV-ZEBRA	899	1	311	0.178674	913	1	1351	-1.50607e-05	72	0.00448456	1238	-0.0314769	179	-1.70472	1833	-0.000196577	1793	-0.000156047	1763	-0.0125487	1763	-0.0125487
CHD8	899	1	977	1	913	1	1712	-0.000328615	1791	-0.00105777	462	-0.0275229	1226	-3.90147	1790	-0.000135378	1816	-0.000184875	1644	-0.008155	1644	-0.008155
ZNF223	899	1	977	1	703	0.681997	1621	-0.000129242	1885	-0.0038955	318	-0.0254955	1010	-3.51833	1542	-1.92768e-05	1281	-2.33358e-06	673	0.000819474	673	0.000819474
ZNF687	899	1	977	1	865	0.928724	1849	-0.00172874	1896	-0.00512997	413	-0.0268779	1138	-3.7306	1684	-5.16247e-05	1664	-5.70374e-05	1781	-0.0135387	1781	-0.0135387
KAT7	899	1	262	0.109116	913	1	1838	-0.00150827	41	0.00930699	270	-0.024668	390	-2.41942	1876	-0.000356402	1888	-0.000553947	1655	-0.0084553	1655	-0.0084553
ZBTB26	899	1	977	1	874	0.944651	1775	-0.000609383	1781	-0.00091341	364	-0.0264184	1209	-3.86504	1572	-2.3178e-05	320	3.90171e-06	1668	-0.00882725	1668	-0.00882725
FXR2	899	1	632	0.560433	913	1	1885	-0.00273916	1893	-0.00494232	336	-0.0258172	148	-1.51867	1843	-0.000221539	1838	-0.000240284	1164	-0.00117038	1164	-0.00117038
EHMT2	899	1	977	1	913	1	1757	-0.000480359	1833	-0.00186958	359	-0.0262316	806	-3.20382	1819	-0.000168271	1765	-0.000122211	1379	-0.00322092	1379	-0.00322092
GTF2A2	899	1	790	0.762615	913	1	1787	-0.000692626	402	0.000152828	323	-0.025597	1513	-4.47336	1851	-0.000241442	1865	-0.000369513	1429	-0.00385753	1429	-0.00385753
SKI	899	1	977	1	827	0.856497	1833	-0.00138992	1863	-0.0028216	428	-0.0270812	1526	-4.52457	1834	-0.000198411	1794	-0.00015854	1831	-0.0167285	1831	-0.0167285
NOTCH1	899	1	759	0.721308	913	1	160	0.000221447	1586	-0.000141179	389	-0.0266891	997	-3.50242	1883	-0.000377838	1866	-0.000379307	1783	-0.0135854	1783	-0.0135854
Crotonyllysine	899	1	977	1	763	0.773365	1874	-0.00238786	545	5.7898e-05	237	-0.0240371	1322	-4.06517	1931	-0.00130071	1922	-0.00112864	1856	-0.0188868	1856	-0.0188868
JUNB	899	1	977	1	754	0.754547	1776	-0.000611609	1824	-0.00162688	259	-0.0244562	1712	-5.0999	1798	-0.00014482	1392	-6.75764e-06	1837	-0.0171184	1837	-0.0171184
MECOM	899	1	977	1	901	0.982249	1853	-0.00180155	1898	-0.00545834	331	-0.0257237	1247	-3.93357	1710	-6.92785e-05	1864	-0.000365825	1754	-0.0122522	1754	-0.0122522
MITF	899	1	977	1	913	1	1800	-0.000805417	1875	-0.00326114	411	-0.026865	1782	-5.51021	1841	-0.000217809	1834	-0.000229463	1428	-0.00383093	1428	-0.00383093
REC8	899	1	314	0.181889	913	1	152	0.000245618	1839	-0.0021135	468	-0.027569	458	-2.58725	1757	-9.80484e-05	1506	-1.69187e-05	1535	-0.00563894	1535	-0.00563894
CTCFL	899	1	977	1	664	0.59981	1805	-0.000901218	1780	-0.000891764	303	-0.0252198	1751	-5.28203	300	1.23769e-05	1595	-3.2209e-05	649	0.00104915	649	0.00104915
KLF17	899	1	977	1	913	1	1806	-0.000902349	206	0.000697702	619	-0.0287462	992	-3.4881	1852	-0.000251366	1654	-5.35588e-05	609	0.00158478	609	0.00158478
ZSCAN26	899	1	834	0.817601	913	1	265	7.35186e-05	1691	-0.000383835	419	-0.0269508	1090	-3.64964	1541	-1.91327e-05	1337	-4.01344e-06	1331	-0.00258982	1331	-0.00258982
FOXH1	899	1	977	1	913	1	1791	-0.000749654	1874	-0.00320247	222	-0.0236524	1325	-4.07728	1550	-2.02042e-05	1647	-5.01829e-05	727	0.000310762	727	0.000310762
H2A.ZK4K7K11ac	899	1	977	1	673	0.621148	1844	-0.00165884	1823	-0.00161676	555	-0.0282913	1273	-3.98717	1900	-0.00059163	1900	-0.00071667	1218	-0.00154624	1218	-0.00154624
DEK	899	1	526	0.432969	913	1	110	0.000359859	1778	-0.000887641	410	-0.0268349	643	-2.93268	1892	-0.00049889	1876	-0.000443611	1756	-0.0122976	1756	-0.0122976
SMARCA5	899	1	977	1	439	0.189902	1864	-0.00209931	1859	-0.00274047	311	-0.0253469	1220	-3.8885	116	0.000144886	1843	-0.000266568	736	0.000251598	736	0.000251598
8-Hydroxydeoxyguanosine	899	1	977	1	913	1	1843	-0.00165842	1865	-0.00283061	174	-0.0223827	935	-3.41306	1861	-0.000278883	1845	-0.000286613	1122	-0.000909271	1122	-0.000909271
H3K9K14ac	899	1	977	1	913	1	1823	-0.00113943	1666	-0.000298258	279	-0.0248373	1662	-4.88325	1341	-2.98627e-06	1648	-5.15532e-05	1737	-0.0114477	1737	-0.0114477
POLR2G	899	1	367	0.240773	913	1	1832	-0.00137218	30	0.0126797	243	-0.0241405	617	-2.88867	1680	-5.07931e-05	1803	-0.000167989	1435	-0.003916	1435	-0.003916
NR2F1	899	1	977	1	665	0.602398	1882	-0.00261215	1884	-0.00383404	328	-0.0256872	1028	-3.54722	392	2.78517e-06	1810	-0.000175686	1723	-0.0107222	1723	-0.0107222
NFIC	899	1	977	1	835	0.876031	1741	-0.000396236	1843	-0.00217598	229	-0.0238465	1180	-3.80612	1926	-0.00112692	1921	-0.00109983	1853	-0.0184624	1853	-0.0184624
C7orf26	899	1	977	1	913	1	1818	-0.00108996	1801	-0.0011806	313	-0.0253541	766	-3.13846	1835	-0.000199568	1837	-0.000236764	1299	-0.00228454	1299	-0.00228454
INTS10	899	1	743	0.705602	913	1	1870	-0.00222294	1919	-0.00957815	208	-0.0232944	384	-2.40538	1797	-0.000143093	1848	-0.000291446	1468	-0.00440258	1468	-0.00440258
EOMES	899	1	977	1	913	1	1873	-0.0023432	1867	-0.00293005	232	-0.0239098	1555	-4.57792	1787	-0.000131691	1741	-0.000101959	1647	-0.0082442	1647	-0.0082442
H3K36me3	899	1	977	1	913	1	1814	-0.000997564	1829	-0.00167993	348	-0.0260369	1628	-4.79546	1891	-0.000478503	1901	-0.00072214	1787	-0.0138406	1787	-0.0138406
TAF9B	899	1	977	1	913	1	1847	-0.00169941	1900	-0.00570144	212	-0.0233961	1118	-3.69628	1820	-0.000172222	1856	-0.000317903	1506	-0.00517421	1506	-0.00517421
EHF	899	1	452	0.343001	913	1	1780	-0.00065248	1807	-0.00129294	141	-0.0210831	255	-1.99861	1896	-0.000533173	1867	-0.000387528	1410	-0.00363463	1410	-0.00363463
IRF4	899	1	977	1	913	1	1857	-0.00192958	1912	-0.00767452	193	-0.0229927	584	-2.81745	1882	-0.000375633	1851	-0.000299231	577	0.00189297	577	0.00189297
MBD2	899	1	932	0.945473	913	1	1876	-0.00246333	1902	-0.00579258	127	-0.0203988	1394	-4.20516	1917	-0.000861846	1923	-0.00118264	1391	-0.00337334	1391	-0.00337334
BRD4	899	1	977	1	913	1	1875	-0.00243321	1888	-0.00434942	185	-0.0227212	1737	-5.2027	1902	-0.0006366	1887	-0.000523944	1460	-0.00420481	1460	-0.00420481
MCPV ST	899	1	977	1	913	1	1889	-0.00289531	1915	-0.00817216	156	-0.0216656	1407	-4.22872	1869	-0.000315063	1861	-0.000337365	1519	-0.00537976	1519	-0.00537976

## Sheet: k-mers ranking
feature	gnn_RRA_rank	gnn_RRA_score	gnn_GuidedBackprop_rank	gnn_GuidedBackprop	gnn_IG_rank	gnn_IG	gnn_IxG_rank	gnn_IxG	gnn_Deconvolution_rank	gnn_Deconvolution
CGCG	1	4.78921e-09	1	0.621695	2	0.220644	2	0.108352	1	0.621695
GCGC	1	4.78921e-09	2	0.563226	1	0.222624	1	0.110209	2	0.563226
CGTG	3	7.66274e-08	3	0.547236	4	0.0688577	4	0.0378567	3	0.547236
GTGC	4	1.87079e-07	5	0.505842	3	0.0705924	3	0.0392435	5	0.505842
CACG	5	3.87926e-07	4	0.510283	5	0.064767	6	0.035101	4	0.510283
GCAC	5	3.87926e-07	6	0.496806	6	0.0642033	5	0.037456	6	0.496806
CGCA	7	1.96388e-06	7	0.369624	9	0.0405622	9	0.0218119	7	0.369624
GCCC	8	4.38243e-06	8	0.313223	11	0.0287042	10	0.0155343	8	0.313223
GCGT	8	4.38243e-06	10	0.305278	10	0.0311058	11	0.015361	10	0.305278
CCCG	10	8.54905e-06	12	0.286797	13	0.026926	13	0.0147288	12	0.286797
GGGC	10	8.54905e-06	13	0.285669	12	0.0282795	12	0.0150029	13	0.285669
CGGG	12	1.96166e-05	11	0.29143	15	0.0218704	16	0.0122707	11	0.29143
GTGT	13	3.1422e-05	14	0.20907	18	0.019279	15	0.0125126	14	0.20907
CACA	13	3.1422e-05	18	0.18352	14	0.021952	14	0.0125913	18	0.18352
ACGC	15	3.90085e-05	16	0.196204	16	0.0217771	19	0.00917084	16	0.196204
TGCG	16	4.78921e-05	20	0.169669	17	0.0206077	18	0.00917577	20	0.169669
CGCC	17	5.82132e-05	19	0.174703	21	0.0159827	20	0.00910564	19	0.174703
CGC	18	8.37637e-05	23	0.12837	7	0.0621235	7	0.0349262	23	0.12837
ACAC	19	0.000116924	25	0.125536	22	0.0151716	23	0.00749032	25	0.125536
GCG	20	0.000159074	27	0.122327	8	0.0545753	8	0.0306019	27	0.122327
TGTG	21	0.000211708	29	0.115915	20	0.0169875	25	0.00686365	29	0.115915
CATG	22	0.000242454	9	0.308931	30	0.010599	24	0.00729842	9	0.308931
GCGG	23	0.000276434	24	0.127094	31	0.0089145	27	0.00464484	24	0.127094
CAGG	24	0.000354977	17	0.189419	33	0.0070936	32	0.00255343	17	0.189419
CCTG	25	0.000449176	21	0.168034	35	0.00608605	33	0.00209373	21	0.168034
ATG	26	0.000845824	41	0.0770802	37	0.00482758	34	0.00204119	41	0.0770802
CCCA	27	0.000931411	33	0.0917914	42	0.00304654	38	0.00119575	33	0.0917914
GGGT	28	0.00102334	26	0.125229	43	0.00290803	37	0.00124103	26	0.125229
GTG	28	0.00102334	43	0.071972	38	0.00448473	22	0.00803689	43	0.071972
GCAT	30	0.0011219	32	0.107659	44	0.00276009	36	0.00175248	32	0.107659
ACCC	31	0.00134022	39	0.08077	46	0.00241893	42	0.000930311	39	0.08077
CAC	32	0.00146061	47	0.0668212	24	0.0135147	17	0.00977005	47	0.0668212
CACC	33	0.00158895	48	0.0621269	48	0.00234564	47	0.000753919	48	0.0621269
GTCC	34	0.00172555	22	0.138712	49	0.00229158	45	0.00080031	22	0.138712
GCAG	35	0.00187079	40	0.0777335	50	0.00226519	44	0.000866524	40	0.0777335
AG	35	0.00187079	44	0.0714075	34	0.00629064	50	0.000531674	44	0.0714075
ACG	35	0.00187079	50	0.0610341	27	0.0121843	29	0.0041075	50	0.0610341
GTGG	38	0.002025	38	0.0820372	51	0.0022555	41	0.00094192	38	0.0820372
CCC	38	0.002025	51	0.0600358	23	0.0136261	21	0.00813273	51	0.0600358
CGCT	40	0.00236183	36	0.0865477	53	0.00190877	46	0.000794379	36	0.0865477
GCTC	41	0.00254519	28	0.120809	54	0.00180826	48	0.000707258	28	0.120809
GCCT	42	0.00273902	45	0.0689971	55	0.00178785	49	0.000556729	45	0.0689971
CGT	42	0.00273902	55	0.0564452	41	0.00312399	35	0.00191493	55	0.0564452
GCA	44	0.00338732	58	0.0541303	28	0.0108987	30	0.00385434	58	0.0541303
TA	45	0.00362704	34	0.0917166	59	0.00165199	51	0.000525696	34	0.0917166
GTAC	46	0.00387926	15	0.201805	60	0.0015996	39	0.00103066	15	0.201805
ACA	46	0.00387926	60	0.0508576	32	0.00757043	31	0.00279657	60	0.0508576
CGAG	48	0.00414442	30	0.114992	61	0.00157077	52	0.000508138	30	0.114992
TGC	48	0.00414442	61	0.0487772	19	0.0174273	28	0.00454756	61	0.0487772
CGTC	50	0.00442294	35	0.0900657	62	0.00156224	56	0.000431457	35	0.0900657
GGG	51	0.00471527	63	0.0421525	25	0.0133926	26	0.00651044	63	0.0421525
TGGG	52	0.00502186	59	0.0515361	64	0.00141676	60	0.000378845	59	0.0515361
GGAC	53	0.0064	31	0.111009	68	0.0012276	53	0.000461096	31	0.111009
GAGC	53	0.0064	52	0.058988	65	0.00140846	68	0.000258717	52	0.058988
CTCG	55	0.00678486	42	0.077025	69	0.0012037	59	0.000403196	42	0.077025
ATGC	56	0.00718682	70	0.0263492	52	0.00214675	64	0.000319879	70	0.0263492
TC	57	0.00760637	53	0.0585878	47	0.00235856	71	0.000187603	53	0.0585878
GTA	57	0.00760637	54	0.0585325	71	0.00110628	58	0.000420148	54	0.0585325
CAT	57	0.00760637	71	0.026015	57	0.00177114	54	0.00045677	71	0.026015
GCGA	60	0.00850033	49	0.0619311	73	0.000932617	69	0.000246619	49	0.0619311
CGGA	61	0.00897576	46	0.0687428	74	0.000753285	61	0.000360279	46	0.0687428
TGT	61	0.00897576	74	0.0203658	39	0.00393391	40	0.00100585	74	0.0203658
TAC	63	0.00947086	65	0.041537	75	0.000660841	66	0.000279471	65	0.041537
GA	64	0.00998616	64	0.0419185	45	0.00270092	76	9.21884e-05	64	0.0419185
CGTA	65	0.0110796	37	0.0846699	78	0.000591047	65	0.000296358	37	0.0846699
AT	66	0.012885	81	0.0144186	76	0.000646937	63	0.000322696	81	0.0144186
AGG	67	0.0142055	83	0.0118604	40	0.00355026	43	0.000924121	83	0.0118604
AGGC	68	0.0149026	84	0.0101684	67	0.0013144	55	0.000446125	84	0.0101684
TGAG	69	0.0196388	78	0.0167493	85	0.00018916	90	4.04368e-05	78	0.0167493
GTCT	70	0.0214435	56	0.0542586	82	0.000272471	92	3.78144e-05	56	0.0542586
GAG	70	0.0214435	92	0.00371411	70	0.00117668	72	0.00018342	92	0.00371411
AGAC	72	0.0233698	72	0.025086	87	0.00016771	94	3.38144e-05	72	0.025086
GAGT	73	0.0243803	67	0.0318957	84	0.000205438	95	3.33932e-05	67	0.0318957
TCC	74	0.0264991	97	0.00212696	79	0.000584558	67	0.000268635	97	0.00212696
ATAC	75	0.0299326	75	0.0186678	100	6.74223e-05	82	5.61874e-05	75	0.0186678
ATCC	76	0.0336894	57	0.0541837	88	0.000163828	103	2.78729e-05	57	0.0541837
CTT	76	0.0336894	103	-0.000584206	83	0.000229038	91	3.87211e-05	103	-0.000584206
CAGA	78	0.0377892	87	0.00711035	93	0.000126701	106	2.72905e-05	87	0.00711035
TT	78	0.0377892	106	-0.00320262	89	0.000151573	88	4.21795e-05	106	-0.00320262
TCCG	80	0.040723	80	0.0160973	80	0.000533004	108	2.58328e-05	80	0.0160973
CCT	81	0.0422523	109	-0.00443789	56	0.00178451	62	0.000346495	109	-0.00443789
GGAT	82	0.0454398	68	0.0318579	94	0.000116968	111	2.448e-05	68	0.0318579
TCCA	83	0.0488043	96	0.0021902	95	0.000116886	113	2.11918e-05	96	0.0021902
ACTC	84	0.0541971	116	-0.00806435	96	0.000108006	101	2.81122e-05	116	-0.00806435
CTC	85	0.0560903	117	-0.00828874	86	0.000174443	70	0.00024118	117	-0.00828874
CGAA	86	0.0641632	62	0.044957	99	7.53716e-05	121	1.83397e-05	62	0.044957
TCT	87	0.0754443	126	-0.0127437	81	0.000272649	78	7.87203e-05	126	-0.0127437
AAG	88	0.0803497	128	-0.0129641	112	1.56317e-05	98	3.09268e-05	128	-0.0129641
TAGG	89	0.0854905	95	0.00305285	107	2.87173e-05	130	1.34239e-05	95	0.00305285
CTCA	90	0.0936593	104	-0.000737122	98	9.39761e-05	133	1.21521e-05	104	-0.000737122
CT	91	0.0999959	66	0.0360705	36	0.00530514	248	-5.15565e-05	66	0.0360705
TTCT	92	0.105445	115	-0.00789402	109	2.28094e-05	137	9.8611e-06	115	-0.00789402
GG	93	0.113376	69	0.0289361	26	0.0125192	249	-5.37649e-05	69	0.0289361
GAA	94	0.11831	119	-0.00845435	111	1.71604e-05	141	8.87001e-06	119	-0.00845435
CTTG	95	0.132317	73	0.0238928	97	0.0001029	145	7.63732e-06	73	0.0238928
AAAG	96	0.136005	113	-0.00653003	125	1.63825e-06	146	7.28746e-06	113	-0.00653003
CAAG	97	0.13977	112	-0.00573789	103	5.09394e-05	147	6.97552e-06	112	-0.00573789
GTTC	97	0.13977	147	-0.0268698	143	-3.43341e-06	129	1.38521e-05	147	-0.0268698
ATTC	99	0.143612	127	-0.012832	131	-1.93283e-07	148	6.07187e-06	127	-0.012832
ACTT	100	0.147533	91	0.00386137	106	3.6265e-05	149	5.77253e-06	91	0.00386137
AAGA	101	0.151534	139	-0.0206159	148	-5.29067e-06	150	5.40318e-06	139	-0.0206159
CC	102	0.15428	77	0.0173393	29	0.0106916	300	-0.000687041	77	0.0173393
CTTA	103	0.155615	121	-0.0104806	117	5.88803e-06	151	4.96873e-06	121	-0.0104806
GTC	103	0.155615	151	-0.0287384	77	0.000612473	97	3.09881e-05	151	-0.0287384
CTAG	105	0.164025	153	-0.0288487	147	-5.06752e-06	134	1.13081e-05	153	-0.0288487
TTGA	106	0.172771	148	-0.0269881	137	-2.15274e-06	155	3.65255e-06	148	-0.0269881
AGTT	107	0.177273	122	-0.0108947	122	2.08613e-06	156	3.64014e-06	122	-0.0108947
TTAT	108	0.181862	144	-0.0239836	128	8.86847e-07	157	3.39371e-06	144	-0.0239836
A	109	0.183853	82	0.0133867	329	-0.0117148	57	0.000425489	82	0.0133867
GAAC	110	0.18654	76	0.0177383	104	4.88129e-05	158	3.06776e-06	76	0.0177383
ACGT	111	0.203125	85	0.00900372	72	0.00105931	292	-0.000357031	85	0.00900372
AAGC	112	0.20616	94	0.00313959	101	6.42212e-05	162	2.5489e-06	94	0.00313959
CTG	113	0.209808	86	0.00788517	66	0.00131739	266	-0.00010333	86	0.00788517
TCGA	114	0.211298	154	-0.0288503	156	-1.01801e-05	163	2.51598e-06	154	-0.0288503
CCTT	114	0.211298	163	-0.0350532	159	-1.11326e-05	80	5.66903e-05	163	-0.0350532
AGAT	116	0.221861	165	-0.0362213	138	-2.2702e-06	136	9.90355e-06	165	-0.0362213
TACT	117	0.227288	140	-0.0210381	160	-1.14554e-05	166	2.09725e-06	140	-0.0210381
TTTG	117	0.227288	160	-0.0327236	166	-1.57544e-05	110	2.49338e-05	160	-0.0327236
TTAG	119	0.232815	107	-0.00409479	118	4.43214e-06	167	1.93331e-06	107	-0.00409479
TCTT	119	0.232815	166	-0.0366094	167	-1.62951e-05	116	2.07769e-05	166	-0.0366094
AAAA	119	0.232815	167	-0.0376909	134	-1.43183e-06	152	4.54222e-06	167	-0.0376909
CACT	122	0.237847	88	0.00667872	90	0.00014756	262	-7.68707e-05	88	0.00667872
TAGA	123	0.244169	152	-0.0287579	155	-9.31381e-06	169	1.81835e-06	152	-0.0287579
CATA	124	0.245187	79	0.0166264	91	0.000145628	250	-5.38322e-05	79	0.0166264
GATT	125	0.25	118	-0.00840006	130	3.5888e-07	170	1.56393e-06	118	-0.00840006
AATT	126	0.255934	137	-0.018476	124	1.76102e-06	171	1.0331e-06	137	-0.018476
TAAA	127	0.261974	155	-0.0305545	132	-3.49904e-07	172	8.65809e-07	155	-0.0305545
AATC	128	0.280735	93	0.00329046	119	4.16704e-06	175	1.6336e-07	93	0.00329046
ACCT	129	0.300317	98	0.0018569	92	0.000135125	235	-2.94875e-05	98	0.0018569
TAAG	130	0.300486	142	-0.0234181	142	-3.43263e-06	178	-1.47996e-07	142	-0.0234181
GGTT	130	0.300486	178	-0.0432428	178	-2.27611e-05	143	8.02409e-06	178	-0.0432428
TAAC	132	0.307296	120	-0.00852316	139	-2.35061e-06	179	-1.83294e-07	120	-0.00852316
TTA	132	0.307296	179	-0.0435899	123	1.96835e-06	105	2.73819e-05	179	-0.0435899
TTAA	134	0.31422	146	-0.0244894	135	-1.46711e-06	180	-2.86396e-07	146	-0.0244894
AAA	134	0.31422	180	-0.0442114	168	-1.66816e-05	119	1.88889e-05	180	-0.0442114
ATTG	136	0.321261	138	-0.0188326	161	-1.15922e-05	181	-2.89267e-07	138	-0.0188326
GAAA	137	0.32842	182	-0.0446252	176	-2.11567e-05	177	-8.44321e-09	182	-0.0446252
CAAT	138	0.343096	100	0.000894328	121	2.56999e-06	184	-7.65898e-07	100	0.000894328
TTTC	138	0.343096	184	-0.0451561	113	1.46041e-05	123	1.68603e-05	184	-0.0451561
AAAT	140	0.350616	185	-0.04594	150	-6.11307e-06	182	-7.56691e-07	185	-0.04594
CGTT	141	0.3621	102	-7.91075e-05	105	3.68208e-05	227	-1.8925e-05	102	-7.91075e-05
TCTG	141	0.3621	105	-0.00205199	102	5.60362e-05	212	-7.44092e-06	105	-0.00205199
TCTA	143	0.366025	123	-0.0116705	126	1.56468e-06	187	-1.07093e-06	123	-0.0116705
AACC	144	0.373917	169	-0.03796	180	-2.6364e-05	188	-1.26217e-06	169	-0.03796
GTTA	145	0.381937	131	-0.0147682	140	-2.92489e-06	189	-1.26837e-06	131	-0.0147682
TGAA	145	0.381937	189	-0.0478864	162	-1.16203e-05	160	2.64039e-06	189	-0.0478864
AAGT	147	0.390085	186	-0.0466159	190	-3.67227e-05	185	-9.24828e-07	186	-0.0466159
TATG	148	0.390639	89	0.00634664	108	2.43145e-05	243	-4.08113e-05	89	0.00634664
GAAG	149	0.398362	173	-0.0410634	191	-3.67347e-05	183	-7.61779e-07	173	-0.0410634
ATTA	150	0.40677	175	-0.0420719	127	1.346e-06	192	-1.64986e-06	175	-0.0420719
TTT	150	0.40677	192	-0.0507613	110	1.92828e-05	77	9.06696e-05	192	-0.0507613
AATA	152	0.415311	174	-0.0415652	151	-6.30285e-06	193	-1.93945e-06	174	-0.0415652
AA	153	0.423986	125	-0.0120532	194	-4.2474e-05	118	1.93637e-05	125	-0.0120532
TTTA	153	0.423986	136	-0.0179788	152	-6.65465e-06	194	-2.04717e-06	136	-0.0179788
CTTC	155	0.432796	193	-0.0516159	186	-3.02646e-05	195	-2.09985e-06	193	-0.0516159
ATCT	156	0.441742	176	-0.042466	171	-1.93643e-05	196	-2.26548e-06	176	-0.042466
TCAG	156	0.441742	196	-0.05339	188	-3.0728e-05	114	2.11793e-05	196	-0.05339
GACT	158	0.450826	158	-0.031443	179	-2.55468e-05	197	-2.38457e-06	158	-0.031443
GCAA	159	0.451447	111	-0.00485239	114	8.67458e-06	255	-5.98806e-05	111	-0.00485239
AGAA	160	0.46005	198	-0.0535499	164	-1.36358e-05	138	9.82306e-06	198	-0.0535499
CTAT	161	0.469415	156	-0.0307726	145	-4.43644e-06	199	-2.55215e-06	156	-0.0307726
CAAA	162	0.478921	110	-0.00478355	120	2.74498e-06	200	-2.56523e-06	110	-0.00478355
ATA	162	0.478921	161	-0.0331625	200	-5.0736e-05	117	2.04287e-05	161	-0.0331625
AGCT	162	0.478921	200	-0.0540075	182	-2.77235e-05	93	3.38462e-05	200	-0.0540075
GAAT	165	0.498368	143	-0.0234352	154	-9.21491e-06	202	-2.62597e-06	143	-0.0234352
ATTT	166	0.50831	203	-0.0558786	165	-1.56394e-05	198	-2.41609e-06	203	-0.0558786
AACT	167	0.5184	162	-0.0338802	129	7.65949e-07	204	-2.83634e-06	162	-0.0338802
CCAA	167	0.5184	177	-0.042986	204	-5.84264e-05	191	-1.61449e-06	177	-0.042986
CTTT	167	0.5184	204	-0.0573764	174	-2.06003e-05	128	1.40298e-05	204	-0.0573764
ATAT	170	0.52864	205	-0.0582056	141	-3.242e-06	144	7.96673e-06	205	-0.0582056
ATAA	171	0.53903	168	-0.0377345	144	-3.83692e-06	206	-3.40224e-06	168	-0.0377345
ATC	171	0.53903	206	-0.058217	203	-5.79475e-05	115	2.08996e-05	206	-0.058217
CTAA	173	0.549573	145	-0.0241692	149	-5.40753e-06	207	-3.65582e-06	145	-0.0241692
TCAA	173	0.549573	207	-0.0590084	115	8.28845e-06	135	1.12467e-05	207	-0.0590084
TTCA	175	0.56027	208	-0.0591985	170	-1.86009e-05	126	1.56124e-05	208	-0.0591985
TATT	176	0.571123	209	-0.0595261	153	-8.69069e-06	176	1.01725e-07	209	-0.0595261
TTTT	177	0.582132	210	-0.0601042	133	-4.57782e-07	131	1.23914e-05	210	-0.0601042
TAAT	178	0.604627	212	-0.060677	136	-1.76757e-06	173	8.13479e-07	212	-0.060677
TTCG	179	0.616116	157	-0.0308624	185	-2.93605e-05	213	-8.00657e-06	157	-0.0308624
TTC	179	0.616116	190	-0.0486835	213	-7.7918e-05	86	4.67671e-05	190	-0.0486835
AAAC	181	0.627768	171	-0.0394736	195	-4.31539e-05	214	-8.81312e-06	171	-0.0394736
CGAT	181	0.627768	194	-0.0517677	214	-8.30996e-05	100	2.86942e-05	194	-0.0517677
GTTG	183	0.639585	215	-0.0622583	201	-5.17956e-05	139	9.08846e-06	215	-0.0622583
GTAG	184	0.651567	134	-0.0169028	183	-2.79732e-05	216	-9.15944e-06	134	-0.0169028
CTGA	184	0.651567	216	-0.0622606	211	-7.46415e-05	99	2.89719e-05	216	-0.0622606
TTAC	186	0.663717	217	-0.062323	184	-2.88631e-05	154	3.75413e-06	217	-0.062323
TATC	187	0.676037	218	-0.0628089	172	-1.95205e-05	203	-2.68697e-06	218	-0.0628089
GTTT	188	0.688527	90	0.00476037	146	-4.86566e-06	219	-1.03127e-05	90	0.00476037
ACTA	189	0.701189	172	-0.039875	157	-1.04376e-05	220	-1.04493e-05	172	-0.039875
TAGT	189	0.701189	220	-0.0645153	181	-2.65478e-05	208	-4.01247e-06	220	-0.0645153
GCTT	191	0.703314	135	-0.0179786	116	7.38201e-06	245	-4.5179e-05	135	-0.0179786
GGAA	192	0.714025	221	-0.0645857	208	-6.60532e-05	211	-6.61786e-06	221	-0.0645857
AGTC	193	0.727037	199	-0.0538847	193	-4.16669e-05	222	-1.20384e-05	199	-0.0538847
TAG	193	0.727037	222	-0.066652	209	-6.65479e-05	112	2.34432e-05	222	-0.066652
CCTA	195	0.740225	183	-0.0449583	198	-4.52284e-05	223	-1.23683e-05	183	-0.0449583
GATA	196	0.753592	224	-0.0678541	158	-1.10653e-05	164	2.28018e-06	224	-0.0678541
ATCG	197	0.780869	201	-0.0541205	192	-3.71834e-05	226	-1.82829e-05	201	-0.0541205
TAT	198	0.808879	114	-0.00725294	189	-3.43678e-05	228	-1.92753e-05	114	-0.00725294
TGAC	198	0.808879	219	-0.0643166	228	-0.000147442	221	-1.08519e-05	219	-0.0643166
TTGG	198	0.808879	228	-0.0707464	205	-6.39897e-05	122	1.78352e-05	228	-0.0707464
CTAC	201	0.823164	223	-0.0675822	216	-9.21627e-05	229	-1.92775e-05	223	-0.0675822
GAT	202	0.837637	211	-0.0602749	230	-0.000153413	210	-6.43978e-06	211	-0.0602749
AGA	202	0.837637	230	-0.0712078	227	-0.000146097	73	0.00015855	230	-0.0712078
AAT	204	0.867154	232	-0.0712609	163	-1.1851e-05	186	-9.83603e-07	232	-0.0712609
ATCA	205	0.882202	233	-0.0723441	173	-2.03028e-05	217	-9.30398e-06	233	-0.0723441
TACC	206	0.897445	213	-0.0613574	210	-7.42575e-05	234	-2.87315e-05	213	-0.0613574
GGC	207	0.919305	150	-0.0284601	58	0.00168256	330	-0.00357656	150	-0.0284601
TACG	208	0.928522	141	-0.0222306	220	-0.000100799	236	-3.09638e-05	141	-0.0222306
TATA	208	0.928522	236	-0.0796826	175	-2.08978e-05	161	2.58189e-06	236	-0.0796826
CATC	210	0.94436	132	-0.015215	196	-4.35773e-05	237	-3.25254e-05	132	-0.015215
TTG	211	0.9604	229	-0.0711415	238	-0.000204202	74	0.000125652	229	-0.0711415
GCTA	211	0.9604	235	-0.079201	221	-0.000110174	238	-3.25532e-05	235	-0.079201
CTA	211	0.9604	238	-0.0805065	234	-0.000171822	81	5.63303e-05	238	-0.0805065
TAA	214	0.976643	239	-0.0813785	169	-1.70967e-05	201	-2.58686e-06	239	-0.0813785
GATC	215	0.993092	240	-0.0824252	199	-4.86495e-05	159	3.06254e-06	240	-0.0824252
CGGC	216	1	99	0.000899093	263	-0.00039146	297	-0.000482519	99	0.000899093
T	216	1	101	0.000448279	333	-0.0169928	329	-0.00344581	101	0.000448279
AC	216	1	108	-0.00429941	332	-0.0169419	328	-0.00340008	108	-0.00429941
TGCA	216	1	124	-0.0118214	267	-0.000449091	318	-0.00155705	124	-0.0118214
GTAT	216	1	129	-0.0136105	212	-7.63743e-05	247	-4.94893e-05	129	-0.0136105
TG	216	1	130	-0.0147184	330	-0.0140493	327	-0.00315025	130	-0.0147184
GTGA	216	1	133	-0.0163897	222	-0.000116806	254	-5.72568e-05	133	-0.0163897
ACGG	216	1	149	-0.0281075	271	-0.000493546	284	-0.000216997	149	-0.0281075
TGCC	216	1	159	-0.0316463	291	-0.00107718	302	-0.000747159	159	-0.0316463
CAG	216	1	164	-0.0357864	290	-0.00105731	288	-0.000268066	164	-0.0357864
GAC	216	1	170	-0.039161	252	-0.000338845	281	-0.000199956	170	-0.039161
GT	216	1	181	-0.0443479	335	-0.0208648	333	-0.00795519	181	-0.0443479
CGG	216	1	187	-0.0468702	306	-0.0018933	326	-0.0029345	187	-0.0468702
GCCG	216	1	188	-0.0472295	303	-0.00160398	311	-0.00112701	188	-0.0472295
CTGG	216	1	191	-0.0497842	244	-0.000251074	127	1.4285e-05	191	-0.0497842
CCG	216	1	195	-0.0530761	63	0.00149696	331	-0.00505172	195	-0.0530761
GCC	216	1	197	-0.0534476	328	-0.00626551	332	-0.00582197	197	-0.0534476
GGA	216	1	202	-0.054273	269	-0.000475441	241	-3.55482e-05	202	-0.054273
ACAT	216	1	214	-0.0615749	283	-0.000799593	299	-0.000681226	214	-0.0615749
CAA	216	1	225	-0.0684145	240	-0.00021849	256	-6.20622e-05	225	-0.0684145
AGGT	216	1	226	-0.0699832	266	-0.000448432	283	-0.000212274	226	-0.0699832
G	216	1	227	-0.0707184	337	-0.145707	337	-0.0325089	227	-0.0707184
C	216	1	231	-0.0712427	338	-0.178443	338	-0.0372347	231	-0.0712427
ATGG	216	1	234	-0.0763581	239	-0.00021811	270	-0.000126873	234	-0.0763581
CA	216	1	237	-0.0805019	336	-0.0401275	336	-0.0158236	237	-0.0805019
AAGG	216	1	241	-0.0828703	218	-9.49005e-05	124	1.66071e-05	241	-0.0828703
TGCT	216	1	242	-0.0830119	285	-0.000817465	257	-6.5354e-05	242	-0.0830119
GTCG	216	1	243	-0.0833991	237	-0.000201077	251	-5.47659e-05	243	-0.0833991
ATAG	216	1	244	-0.0836768	177	-2.14859e-05	190	-1.48911e-06	244	-0.0836768
ATGT	216	1	245	-0.0844252	293	-0.0011323	306	-0.000851668	245	-0.0844252
ATGA	216	1	246	-0.0845858	202	-5.24046e-05	174	7.33761e-07	246	-0.0845858
GATG	216	1	247	-0.0856893	236	-0.000185306	260	-7.23649e-05	247	-0.0856893
GTT	216	1	248	-0.0862293	243	-0.000248154	87	4.55356e-05	248	-0.0862293
TGGA	216	1	249	-0.0867148	248	-0.000303058	276	-0.000175865	249	-0.0867148
CGAC	216	1	250	-0.0885211	251	-0.000330961	267	-0.000112728	250	-0.0885211
CGA	216	1	251	-0.0891575	288	-0.000934557	294	-0.000393764	251	-0.0891575
TGAT	216	1	252	-0.0916979	207	-6.49648e-05	224	-1.3525e-05	252	-0.0916979
CAGT	216	1	253	-0.0931862	242	-0.000237624	261	-7.45232e-05	253	-0.0931862
ATT	216	1	254	-0.0942004	219	-9.64896e-05	140	9.04739e-06	254	-0.0942004
ACTG	216	1	255	-0.0972905	247	-0.000291094	272	-0.000135546	255	-0.0972905
TGTC	216	1	256	-0.0983638	270	-0.000486885	271	-0.000133574	256	-0.0983638
CG	216	1	257	-0.0985686	339	-0.182793	339	-0.051092	257	-0.0985686
CAAC	216	1	258	-0.0986282	223	-0.00012266	240	-3.52039e-05	258	-0.0986282
ACAG	216	1	259	-0.0992427	275	-0.000577532	275	-0.000170604	259	-0.0992427
GTAA	216	1	260	-0.102324	187	-3.05494e-05	205	-3.04886e-06	260	-0.102324
CATT	216	1	261	-0.10334	231	-0.000157741	246	-4.5524e-05	261	-0.10334
TAGC	216	1	262	-0.103576	206	-6.48021e-05	231	-2.64066e-05	262	-0.103576
GGTC	216	1	263	-0.105121	241	-0.000222698	168	1.90632e-06	263	-0.105121
CCAG	216	1	264	-0.105772	273	-0.000538751	75	0.000109223	264	-0.105772
TTCC	216	1	265	-0.106137	226	-0.000130949	96	3.18476e-05	265	-0.106137
CCTC	216	1	266	-0.107039	284	-0.000806434	268	-0.000114855	266	-0.107039
TGTT	216	1	267	-0.10714	235	-0.000182002	209	-4.45701e-06	267	-0.10714
ACT	216	1	268	-0.107444	277	-0.000667025	285	-0.000244009	268	-0.107444
TGG	216	1	269	-0.109751	319	-0.00303114	317	-0.00147599	269	-0.109751
AAC	216	1	270	-0.112224	254	-0.000339764	253	-5.6058e-05	270	-0.112224
CCAC	216	1	271	-0.113493	315	-0.00247258	322	-0.00209024	271	-0.113493
TCTC	216	1	272	-0.114332	225	-0.000128375	102	2.80599e-05	272	-0.114332
TCAT	216	1	273	-0.115039	217	-9.3186e-05	125	1.60512e-05	273	-0.115039
CTCC	216	1	274	-0.115989	286	-0.00085462	120	1.87042e-05	274	-0.115989
AGTA	216	1	275	-0.116268	197	-4.44885e-05	153	4.26767e-06	275	-0.116268
AATG	216	1	276	-0.116857	215	-8.47586e-05	239	-3.39565e-05	276	-0.116857
GTCA	216	1	277	-0.117082	233	-0.000167438	215	-9.05874e-06	277	-0.117082
TACA	216	1	278	-0.118478	264	-0.000394025	286	-0.000248816	278	-0.118478
GCTG	216	1	279	-0.118928	310	-0.00207113	290	-0.000326545	279	-0.118928
GAGG	216	1	280	-0.119073	268	-0.000460269	142	8.09909e-06	280	-0.119073
CCA	216	1	281	-0.120915	321	-0.00336825	305	-0.000846632	281	-0.120915
CGGT	216	1	282	-0.122597	289	-0.000940848	295	-0.000408626	282	-0.122597
TGTA	216	1	283	-0.123804	276	-0.000614315	291	-0.000328903	283	-0.123804
CTGC	216	1	284	-0.125415	324	-0.00402784	323	-0.0021877	284	-0.125415
ACC	216	1	285	-0.125428	311	-0.00214695	310	-0.00101787	285	-0.125428
GGT	216	1	286	-0.128089	322	-0.00348676	319	-0.00161273	286	-0.128089
CCGA	216	1	287	-0.128404	262	-0.000383531	165	2.15249e-06	287	-0.128404
AGC	216	1	288	-0.128859	309	-0.00204829	313	-0.00115039	288	-0.128859
AGAG	216	1	289	-0.128915	245	-0.000269244	132	1.22287e-05	289	-0.128915
ACGA	216	1	290	-0.129485	255	-0.000362301	287	-0.000262079	290	-0.129485
AGT	216	1	291	-0.129958	281	-0.00075865	258	-6.79173e-05	291	-0.129958
TTGC	216	1	292	-0.130782	261	-0.000378321	263	-7.73591e-05	292	-0.130782
CCAT	216	1	293	-0.13102	258	-0.000376129	230	-2.18083e-05	293	-0.13102
CTCT	216	1	294	-0.132875	256	-0.000367016	232	-2.67844e-05	294	-0.132875
GC	216	1	295	-0.13315	340	-0.206926	340	-0.0690694	295	-0.13315
GGTG	216	1	296	-0.134037	325	-0.00409853	324	-0.0021946	296	-0.134037
GGCC	216	1	297	-0.134085	307	-0.00190521	303	-0.000755804	297	-0.134085
GACG	216	1	298	-0.13551	300	-0.00145084	307	-0.000855508	298	-0.13551
GGGG	216	1	299	-0.135741	317	-0.00264748	316	-0.0014294	299	-0.135741
GCT	216	1	300	-0.137475	323	-0.00360603	315	-0.00142055	300	-0.137475
ACCG	216	1	301	-0.139302	278	-0.000682641	279	-0.000194151	301	-0.139302
TGA	216	1	302	-0.139623	287	-0.000859953	269	-0.000125897	302	-0.139623
CCCC	216	1	303	-0.142886	320	-0.00334851	320	-0.0016231	303	-0.142886
GACA	216	1	304	-0.143195	280	-0.00074418	278	-0.000188916	304	-0.143195
GAGA	216	1	305	-0.143256	232	-0.000161399	83	5.5585e-05	305	-0.143256
CAGC	216	1	306	-0.145005	312	-0.00216575	298	-0.000542173	306	-0.145005
GGTA	216	1	307	-0.145775	229	-0.000149323	233	-2.8123e-05	307	-0.145775
CCGC	216	1	308	-0.147349	331	-0.0160279	335	-0.0105866	308	-0.147349
TCG	216	1	309	-0.15161	294	-0.00115583	309	-0.000863459	309	-0.15161
ACAA	216	1	310	-0.151931	246	-0.000283344	259	-6.97954e-05	310	-0.151931
GACC	216	1	311	-0.152418	260	-0.000377979	218	-9.38479e-06	311	-0.152418
TGGC	216	1	312	-0.154605	295	-0.0011855	277	-0.000176677	312	-0.154605
CCGT	216	1	313	-0.156816	318	-0.00283729	312	-0.00113466	313	-0.156816
TCGG	216	1	314	-0.158807	249	-0.000306938	85	5.07834e-05	314	-0.158807
CCCT	216	1	315	-0.160608	302	-0.00155923	225	-1.58941e-05	315	-0.160608
GGGA	216	1	316	-0.164755	296	-0.00123067	244	-4.10664e-05	316	-0.164755
AGGA	216	1	317	-0.165102	253	-0.000339398	84	5.1196e-05	317	-0.165102
TCAC	216	1	318	-0.16562	279	-0.000743803	289	-0.000305169	318	-0.16562
AACA	216	1	319	-0.167086	250	-0.000308351	242	-3.60711e-05	319	-0.167086
GGCG	216	1	320	-0.167437	334	-0.0172542	334	-0.0102675	320	-0.167437
TCA	216	1	321	-0.169415	282	-0.000785036	89	4.18197e-05	321	-0.169415
AACG	216	1	322	-0.170829	265	-0.000422392	280	-0.000199554	322	-0.170829
TGGT	216	1	323	-0.174472	257	-0.000367806	79	5.77392e-05	323	-0.174472
TCCT	216	1	324	-0.174475	272	-0.00050932	107	2.62799e-05	324	-0.174475
TTGT	216	1	325	-0.17823	224	-0.000125674	109	2.49874e-05	325	-0.17823
AGTG	216	1	326	-0.179605	301	-0.0015253	296	-0.000409743	326	-0.179605
ACCA	216	1	327	-0.180597	274	-0.000545692	264	-8.57649e-05	327	-0.180597
CCGG	216	1	328	-0.183092	316	-0.00255404	308	-0.000861586	328	-0.183092
GGCT	216	1	329	-0.190269	298	-0.0012788	274	-0.000147364	329	-0.190269
GGAG	216	1	330	-0.19072	297	-0.00124371	252	-5.58664e-05	330	-0.19072
TCGC	216	1	331	-0.193802	313	-0.00217486	314	-0.00135741	331	-0.193802
GGCA	216	1	332	-0.199539	326	-0.00460143	321	-0.00201545	332	-0.199539
TCGT	216	1	333	-0.202853	259	-0.000376288	104	2.78296e-05	333	-0.202853
AGCG	216	1	334	-0.206184	327	-0.00492412	325	-0.00238299	334	-0.206184
AGCC	216	1	335	-0.208686	292	-0.0010995	273	-0.000146239	335	-0.208686
TCCC	216	1	336	-0.209883	299	-0.00130426	282	-0.000205834	336	-0.209883
AGGG	216	1	337	-0.21599	304	-0.00160471	265	-9.35176e-05	337	-0.21599
GCCA	216	1	338	-0.219152	308	-0.00192051	293	-0.000362737	338	-0.219152
AGCA	216	1	339	-0.225499	305	-0.00184648	301	-0.000734982	339	-0.225499
CTGT	216	1	340	-0.264576	314	-0.00218639	304	-0.000791145	340	-0.264576

## Sheet: Gene Ontology Analysis
	GO:0006357 (negative regulation of transcription by RNA polymerase II)				GO:0045944 (positive regulation of transcription by RNA polymerase II)				KW-0863 (zinc finger)
	ID	Gene Name	Species		ID	Gene Name	Species		ID	Gene Name	Species			Key
	CTCF	CCCTC-binding factor(CTCF)	Homo sapiens		CTCF	CCCTC-binding factor(CTCF)	Homo sapiens		CTCF	CCCTC-binding factor(CTCF)	Homo sapiens				negative regulators present in other lists
	CTR9	CTR9 homolog, Paf1/RNA polymerase II complex component(CTR9)	Homo sapiens		CTR9	CTR9 homolog, Paf1/RNA polymerase II complex component(CTR9)	Homo sapiens		KLF4	KLF transcription factor 4(KLF4)	Homo sapiens				positive regulaots in other lists
	JUN	Jun proto-oncogene, AP-1 transcription factor subunit(JUN)	Homo sapiens		JUN	Jun proto-oncogene, AP-1 transcription factor subunit(JUN)	Homo sapiens		ESR1	estrogen receptor 1(ESR1)	Homo sapiens
	KLF4	KLF transcription factor 4(KLF4)	Homo sapiens		KLF4	KLF transcription factor 4(KLF4)	Homo sapiens		NR2E3	nuclear receptor subfamily 2 group E member 3(NR2E3)	Homo sapiens
	MAX	MYC associated factor X(MAX)	Homo sapiens		MAX	MYC associated factor X(MAX)	Homo sapiens		ZBTB17	zinc finger and BTB domain containing 17(ZBTB17)	Homo sapiens
	RUNX1	RUNX family transcription factor 1(RUNX1)	Homo sapiens		RUNX1	RUNX family transcription factor 1(RUNX1)	Homo sapiens		BMI1	BMI1 proto-oncogene, polycomb ring finger(BMI1)	Homo sapiens
	SOX2	SRY-box transcription factor 2(SOX2)	Homo sapiens		SOX2	SRY-box transcription factor 2(SOX2)	Homo sapiens		DNMT3B	DNA methyltransferase 3 beta(DNMT3B)	Homo sapiens
	SMARCA2	SWI/SNF related BAF chromatin remodeling complex subunit ATPase 2(SMARCA2)	Homo sapiens		SMARCA2	SWI/SNF related BAF chromatin remodeling complex subunit ATPase 2(SMARCA2)	Homo sapiens		KLF11	KLF transcription factor 11(KLF11)	Homo sapiens
	ASCL1	achaete-scute family bHLH transcription factor 1(ASCL1)	Homo sapiens		ASCL1	achaete-scute family bHLH transcription factor 1(ASCL1)	Homo sapiens		KLF8	KLF transcription factor 8(KLF8)	Homo sapiens
	ESR1	estrogen receptor 1(ESR1)	Homo sapiens		ESR1	estrogen receptor 1(ESR1)	Homo sapiens		RYBP	RING1 and YY1 binding protein(RYBP)	Homo sapiens
	FOXA1	forkhead box A1(FOXA1)	Homo sapiens		FOXA1	forkhead box A1(FOXA1)	Homo sapiens		SUZ12	SUZ12 polycomb repressive complex 2 subunit(SUZ12)	Homo sapiens
	FOXK2	forkhead box K2(FOXK2)	Homo sapiens		FOXK2	forkhead box K2(FOXK2)	Homo sapiens		ZFP36	ZFP36 ring finger protein(ZFP36)	Homo sapiens
	HDAC3	histone deacetylase 3(HDAC3)	Homo sapiens		HDAC3	histone deacetylase 3(HDAC3)	Homo sapiens		CHD4	chromodomain helicase DNA binding protein 4(CHD4)	Homo sapiens
	MYOCD	myocardin(MYOCD)	Homo sapiens		MYOCD	myocardin(MYOCD)	Homo sapiens		FOXP1	forkhead box P1(FOXP1)	Homo sapiens
	NR2E3	nuclear receptor subfamily 2 group E member 3(NR2E3)	Homo sapiens		NR2E3	nuclear receptor subfamily 2 group E member 3(NR2E3)	Homo sapiens		ING2	inhibitor of growth family member 2(ING2)	Homo sapiens
	SREBF2	sterol regulatory element binding transcription factor 2(SREBF2)	Homo sapiens		SREBF2	sterol regulatory element binding transcription factor 2(SREBF2)	Homo sapiens		KDM2B	lysine demethylase 2B(KDM2B)	Homo sapiens
	ZBTB17	zinc finger and BTB domain containing 17(ZBTB17)	Homo sapiens		ZBTB17	zinc finger and BTB domain containing 17(ZBTB17)	Homo sapiens		TRPS1	transcriptional repressor GATA binding 1(TRPS1)	Homo sapiens
	BMI1	BMI1 proto-oncogene, polycomb ring finger(BMI1)	Homo sapiens		ATRX	ATRX chromatin remodeler(ATRX)	Homo sapiens		ZBTB14	zinc finger and BTB domain containing 14(ZBTB14)	Homo sapiens
	DDX5	DEAD-box helicase 5(DDX5)	Homo sapiens		E2F4	E2F transcription factor 4(E2F4)	Homo sapiens		ZBTB46	zinc finger and BTB domain containing 46(ZBTB46)	Homo sapiens
	DMAP1	DNA methyltransferase 1 associated protein 1(DMAP1)	Homo sapiens		ETS1	ETS proto-oncogene 1, transcription factor(ETS1)	Homo sapiens		ZNF217	zinc finger protein 217(ZNF217)	Homo sapiens
	DNMT3B	DNA methyltransferase 3 beta(DNMT3B)	Homo sapiens		MYCN	MYCN proto-oncogene, bHLH transcription factor(MYCN)	Homo sapiens		ZNF354C	zinc finger protein 354C(ZNF354C)	Homo sapiens
	KLF11	KLF transcription factor 11(KLF11)	Homo sapiens		NKRF	NFKB repressing factor(NKRF)	Homo sapiens		ZNF692	zinc finger protein 692(ZNF692)	Homo sapiens
	KLF8	KLF transcription factor 8(KLF8)	Homo sapiens		PPARGC1A	PPARG coactivator 1 alpha(PPARGC1A)	Homo sapiens		ATRX	ATRX chromatin remodeler(ATRX)	Homo sapiens
	POU6F1	POU class 6 homeobox 1(POU6F1)	Homo sapiens		S100A10	S100 calcium binding protein A10(S100A10)	Homo sapiens		KAT6B	lysine acetyltransferase 6B(KAT6B)	Homo sapiens
	RYBP	RING1 and YY1 binding protein(RYBP)	Homo sapiens		SIX2	SIX homeobox 2(SIX2)	Homo sapiens		KDM3A	lysine demethylase 3A(KDM3A)	Homo sapiens
	SUZ12	SUZ12 polycomb repressive complex 2 subunit(SUZ12)	Homo sapiens		SOX17	SRY-box transcription factor 17(SOX17)	Homo sapiens		KMT2A	lysine methyltransferase 2A(KMT2A)	Homo sapiens
	ZFP36	ZFP36 ring finger protein(ZFP36)	Homo sapiens		WAS	WASP actin nucleation promoting factor(WAS)	Homo sapiens		NR4A1	nuclear receptor subfamily 4 group A member 1(NR4A1)	Homo sapiens
	CHD4	chromodomain helicase DNA binding protein 4(CHD4)	Homo sapiens		CDC5L	cell division cycle 5 like(CDC5L)	Homo sapiens		NR5A2	nuclear receptor subfamily 5 group A member 2(NR5A2)	Homo sapiens
	DACH1	dachshund family transcription factor 1(DACH1)	Homo sapiens		CHD6	chromodomain helicase DNA binding protein 6(CHD6)	Homo sapiens		ZNF300	zinc finger protein 300(ZNF300)	Homo sapiens
	EZH2	enhancer of zeste 2 polycomb repressive complex 2 subunit(EZH2)	Homo sapiens		CHD7	chromodomain helicase DNA binding protein 7(CHD7)	Homo sapiens		ZFP82	ZFP82 zinc finger protein(ZFP82)	Homo sapiens
	FOXP1	forkhead box P1(FOXP1)	Homo sapiens		GTF2I	general transcription factor IIi(GTF2I)	Homo sapiens		ADNP	activity dependent neuroprotector homeobox(ADNP)	Homo sapiens
	ING2	inhibitor of growth family member 2(ING2)	Homo sapiens		HOXC11	homeobox C11(HOXC11)	Homo sapiens		EEA1	early endosome antigen 1(EEA1)	Homo sapiens
	JARID2	jumonji and AT-rich interaction domain containing 2(JARID2)	Homo sapiens		HIF1A	hypoxia inducible factor 1 subunit alpha(HIF1A)	Homo sapiens		KMT2B	lysine methyltransferase 2B(KMT2B)	Homo sapiens
	KDM2B	lysine demethylase 2B(KDM2B)	Homo sapiens		KAT6B	lysine acetyltransferase 6B(KAT6B)	Homo sapiens		NR3C2	nuclear receptor subfamily 3 group C member 2(NR3C2)	Homo sapiens
	macroH2A1	macroH2A.1 histone(MACROH2A1)	Homo sapiens		KDM3A	lysine demethylase 3A(KDM3A)	Homo sapiens		ZSCAN23	zinc finger and SCAN domain containing 23(ZSCAN23)	Homo sapiens
	MSX2	msh homeobox 2(MSX2)	Homo sapiens		KMT2A	lysine methyltransferase 2A(KMT2A)	Homo sapiens		ZNF207	zinc finger protein 207(ZNF207)	Homo sapiens
	NCOR1	nuclear receptor corepressor 1(NCOR1)	Homo sapiens		NELFA	negative elongation factor complex member A(NELFA)	Homo sapiens		ZNF227	zinc finger protein 227(ZNF227)	Homo sapiens
	TRPS1	transcriptional repressor GATA binding 1(TRPS1)	Homo sapiens		NR4A1	nuclear receptor subfamily 4 group A member 1(NR4A1)	Homo sapiens		ZNF384	zinc finger protein 384(ZNF384)	Homo sapiens
	TRIB3	tribbles pseudokinase 3(TRIB3)	Homo sapiens		NR5A2	nuclear receptor subfamily 5 group A member 2(NR5A2)	Homo sapiens		ZNF417	zinc finger protein 417(ZNF417)	Homo sapiens
	ZBTB14	zinc finger and BTB domain containing 14(ZBTB14)	Homo sapiens		SLC30A9	solute carrier family 30 member 9(SLC30A9)	Homo sapiens		ZNF574	zinc finger protein 574(ZNF574)	Homo sapiens
	ZBTB46	zinc finger and BTB domain containing 46(ZBTB46)	Homo sapiens		TET2	tet methylcytosine dioxygenase 2(TET2)	Homo sapiens		ZNF610	zinc finger protein 610(ZNF610)	Homo sapiens
	ZNF217	zinc finger protein 217(ZNF217)	Homo sapiens		USF3	upstream transcription factor family member 3(USF3)	Homo sapiens		ZNF641	zinc finger protein 641(ZNF641)	Homo sapiens
	ZNF354C	zinc finger protein 354C(ZNF354C)	Homo sapiens		ZNF300	zinc finger protein 300(ZNF300)	Homo sapiens		ZNF768	zinc finger protein 768(ZNF768)	Homo sapiens
	ZNF692	zinc finger protein 692(ZNF692)	Homo sapiens						ZNF770	zinc finger protein 770(ZNF770)	Homo sapiens
									7+5	17+5
